# Supplementary material for: Failures of nerve regeneration caused by aging or chronic denervation are rescued by restoring Schwann cell c-Jun
Source: eLife. 2021 Jan 21;10:e62232. doi: 10.7554/eLife.62232 (PMC7819709; doi:10.7554/eLife.62232)
Supplement: Supplementary file 1. — The data compare (A) uncut nerves, (B) 3-day cut nerves, and (C) the injury response. In (A) and (B), genes expressed at higher levels in aged mice under the conditions indicated are in blue (top), while genes with reduced expression in aged mice are in red (bottom). In (C), genes that respond more strongly to injury in aged mice are in blue (top), while genes with weaker injury response in aged mice are in red (bottom). [file elife-62232-supp1.xlsx]

## Sheet: Supplementary File 1
Experimental Condition	Gene	Fold Change	log Fold Change	Adjusted p value
	Igkv3-5	1028.58	10.0064	0.0228091
	Gm2619	704.381	9.46021	3.46302e-12
	Igkv3-10	574.388	9.16588	0.0444565
	Ighv1-26	413.012	8.69004	0.00601157
	Igkv4-55	283.205	8.1457	0.0216128
	Igkv14-126	212.566	7.73177	0.00336079
(A) Uninjured nerves; aged vs young	Tph2	177.042	7.46795	0.00144503
	Ighv1-53	166.42	7.37869	0.0246916
	Il13ra2	164.662	7.36336	2.79068e-06
	Lipf	146.644	7.19617	0.00685619
	Gm34973	142.829	7.15815	3.9906e-05
	Cfi	139.672	7.1259	3.05644e-05
	Gm9696	115.974	6.85766	0.0065664
	Ighv11-2	111.941	6.80659	0.0149165
	Gpr50	109.896	6.77999	0.00941424
	Lipf	165.411	7.36991	0.00332524
	Igkv14-126	150.535	7.23395	0.0120091
	Gm36827	84.5414	6.40159	0.000401892
	Ighv11-2	72.5	6.17991	0.0488163
	5033425B01Rik	65.305	6.02912	1.38842e-06
	Gsg1l	63.5134	5.98899	0.00414998
(B) 3 day cut nerves; aged vs young	1700047G03Rik	51.085	5.67483	0.00174553
	Prr32	43.4856	5.44247	4.38187e-05
	Igha	42.8116	5.41993	0.000869521
	Slc5a7	40.6143	5.34391	0.00652918
	Tafa1	28.0535	4.81011	0.00207533
	A330094K24Rik	26.7616	4.74209	0.0382114
	Gm7609	22.5728	4.49651	0.00299089
	Mup22	0.0293274	-5.09161	0.000709208
	Mup11	0.0353278	-4.82305	0.00908724
	Npy6r	359.286	8.48899	2.39433e-05
	Il1f9	142.336	7.15316	0.000933593
	Ttll6	38.622	5.27135	0.0223416
	Tafa1	38.3184	5.25997	0.000710196
	Ighv1-26	0.00289916	-8.43015	0.0323984
	Ighv5-17	0.00529795	-7.56035	0.025636
(C) 3 day cut compare to uninjured: aged vs young	Cfi	0.00802624	-6.96106	0.000445207
	Pla2g2e	0.0111184	-6.4909	7.50908e-10
	Spns3	0.0114039	-6.45433	5.28493e-05
	Tcerg1l	0.0142336	-6.13455	0.00372055
	Apoc4	0.0159999	-5.9658	0.00384729
	Gm2619	0.0202553	-5.62556	0.0397752
	Saa3	0.0221763	-5.49484	6.54904e-06
	Olig1	0.0263447	-5.24635	0.0480525
	Il13ra2	0.0270058	-5.21059	0.00473209
