# Supplementary material for: Failures of nerve regeneration caused by aging or chronic denervation are rescued by restoring Schwann cell c-Jun
Source: eLife. 2021 Jan 21;10:e62232. doi: 10.7554/eLife.62232 (PMC7819709; doi:10.7554/eLife.62232)
Supplement: Supplementary file 2. — (A, B) Genes expressed at higher levels in aged mice under the conditions indicated are in blue (top), while genes with reduced expression in aged mice are in red (bottom). (C) Genes that respond more strongly to injury (3-day cut vs UI) in aged mice are in blue (top), while genes with weaker injury response are in red (bottom). (D) The 303 genes that are significantly expressed in young WT vs UI and aged c-Jun OE/+ vs UI 3 days after injury. (E) Genes expressed at higher levels after chronic denervation are in blue (top), while genes with reduced expression are in red (bottom). (F) The 227 genes that are significantly expressed in WT 1 week vs UI and c-Jun OE/+ 10 week vs UI. [file elife-62232-supp2.xlsx]

## Sheet: A
	Supplementary File 2
(A) The 1477 genes differentially expressed between uninjured nerves in aged and young WT mice (WT UI aged vs young)
Gene		Fold Change	log Fold Change	Adjusted p value
Igkv3-5	immunoglobulin kappa chain variable 3-5 [Source:MGI Symbol;Acc:MGI:1330854]	1028.58	10.0064	0.0228091
Gm2619	predicted gene 2619 [Source:MGI Symbol;Acc:MGI:3780787]	704.381	9.46021	3.46302e-12
Igkv3-10	immunoglobulin kappa variable 3-10 [Source:MGI Symbol;Acc:MGI:1330821]	574.388	9.16588	0.0444565
Ighv1-26	immunoglobulin heavy variable 1-26 [Source:MGI Symbol;Acc:MGI:4439641]	413.012	8.69004	0.00601157
Igkv4-55	immunoglobulin kappa variable 4-55 [Source:MGI Symbol;Acc:MGI:2686370]	283.205	8.1457	0.0216128
Igkv14-126	immunoglobulin kappa variable 14-126 [Source:MGI Symbol;Acc:MGI:3643131]	212.566	7.73177	0.00336079
Tph2	tryptophan hydroxylase 2 [Source:MGI Symbol;Acc:MGI:2651811]	177.042	7.46795	0.00144503
Ighv1-53	immunoglobulin heavy variable 1-53 [Source:MGI Symbol;Acc:MGI:3576502]	166.42	7.37869	0.0246916
Il13ra2	interleukin 13 receptor, alpha 2 [Source:MGI Symbol;Acc:MGI:1277954]	164.662	7.36336	2.79068e-06
Lipf	lipase, gastric [Source:MGI Symbol;Acc:MGI:1914967]	146.644	7.19617	0.00685619
Gm34973	predicted gene, 34973 [Source:MGI Symbol;Acc:MGI:5594132]	142.829	7.15815	3.9906e-05
Cfi	complement component factor i [Source:MGI Symbol;Acc:MGI:105937]	139.672	7.1259	3.05644e-05
Gm9696	predicted gene 9696 [Source:MGI Symbol;Acc:MGI:3819177]	115.974	6.85766	0.0065664
Ighv11-2	immunoglobulin heavy variable V11-2 [Source:MGI Symbol;Acc:MGI:4947968]	111.941	6.80659	0.0149165
Gpr50	G-protein-coupled receptor 50 [Source:MGI Symbol;Acc:MGI:1333877]	109.896	6.77999	0.00941424
Ighg2c	immunoglobulin heavy constant gamma 2C [Source:MGI Symbol;Acc:MGI:2686979]	104.911	6.71303	0.00816414
Ighv1-76	immunoglobulin heavy variable 1-76 [Source:MGI Symbol;Acc:MGI:4439737]	103.218	6.68955	0.0116692
Slc5a7	solute carrier family 5 (choline transporter), member 7 [Source:MGI Symbol;Acc:MGI:1927126]	100.19	6.6466	0.000228151
1700047G03Rik	RIKEN cDNA 1700047G03 gene [Source:MGI Symbol;Acc:MGI:1920589]	94.5467	6.56296	0.000623442
Saa3	serum amyloid A 3 [Source:MGI Symbol;Acc:MGI:98223]	93.7467	6.5507	8.54661e-06
Gm2666	predicted gene 2666 [Source:MGI Symbol;Acc:MGI:3780835]	93.5472	6.54762	0.000256284
Ighv1-11	immunoglobulin heavy variable V1-11 [Source:MGI Symbol;Acc:MGI:5009835]	89.4457	6.48294	0.0383127
Mmp12	matrix metallopeptidase 12 [Source:MGI Symbol;Acc:MGI:97005]	85.8758	6.42418	0.000203919
Tcerg1l	transcription elongation regulator 1-like [Source:MGI Symbol;Acc:MGI:1917821]	84.3583	6.39846	5.14463e-05
Ighg3	Immunoglobulin heavy constant gamma 3 [Source:MGI Symbol;Acc:MGI:2144790]	75.3353	6.23525	0.0220194
Gm7592	predicted gene 7592 [Source:MGI Symbol;Acc:MGI:3644077]	74.1389	6.21216	0.000941378
Itgad	integrin, alpha D [Source:MGI Symbol;Acc:MGI:3578624]	69.6672	6.12241	0.0222356
Hesx1	homeobox gene expressed in ES cells [Source:MGI Symbol;Acc:MGI:96071]	64.4275	6.0096	0.000341597
Tmem132b	transmembrane protein 132B [Source:MGI Symbol;Acc:MGI:3609245]	60.5769	5.9207	0.0127032
Jchain	immunoglobulin joining chain [Source:MGI Symbol;Acc:MGI:96493]	59.5212	5.89533	0.00562987
Pkp1	plakophilin 1 [Source:MGI Symbol;Acc:MGI:1328359]	57.4727	5.84481	1.05449e-08
Dsg1a	desmoglein 1 alpha [Source:MGI Symbol;Acc:MGI:94930]	57.0169	5.83332	0.00794845
Spns3	spinster homolog 3 [Source:MGI Symbol;Acc:MGI:1924827]	52.4489	5.71284	0.000268801
Igkc	immunoglobulin kappa constant [Source:MGI Symbol;Acc:MGI:96495]	51.2599	5.67976	0.00503586
Lep	leptin [Source:MGI Symbol;Acc:MGI:104663]	50.1213	5.64735	1.35748e-05
Gm36816	predicted gene, 36816 [Source:MGI Symbol;Acc:MGI:5595975]	48.6241	5.6036	2.80373e-06
Mup-ps21	major urinary protein, pseudogene 21 [Source:MGI Symbol;Acc:MGI:3652151]	47.5073	5.57008	0.00808396
Ubd	ubiquitin D [Source:MGI Symbol;Acc:MGI:1344410]	46.9282	5.55238	0.00100882
Il12b	interleukin 12b [Source:MGI Symbol;Acc:MGI:96540]	46.76	5.5472	0.0070983
Igkv8-16	immunoglobulin kappa variable 8-16 [Source:MGI Symbol;Acc:MGI:1330843]	46.7119	5.54572	0.0360358
Gm4912	predicted pseudogene 4912 [Source:MGI Symbol;Acc:MGI:3643140]	45.4001	5.50462	0.00264558
Tfr2	transferrin receptor 2 [Source:MGI Symbol;Acc:MGI:1354956]	44.9215	5.48933	3.42955e-05
Prr32	proline rich 32 [Source:MGI Symbol;Acc:MGI:1916050]	44.8582	5.4873	1.23645e-05
Apoc4	apolipoprotein C-IV [Source:MGI Symbol;Acc:MGI:87878]	44.6397	5.48025	0.00162842
Cdkl4	cyclin-dependent kinase-like 4 [Source:MGI Symbol;Acc:MGI:3587025]	44.358	5.47112	0.000292985
Gm24074	predicted gene, 24074 [Source:MGI Symbol;Acc:MGI:5453851]	42.7483	5.4178	0.00433332
Gm7609	predicted pseudogene 7609 [Source:MGI Symbol;Acc:MGI:3644536]	42.3614	5.40468	2.7109e-05
C6	complement component 6 [Source:MGI Symbol;Acc:MGI:88233]	41.0038	5.35769	1.21092e-05
B930092H01Rik	RIKEN cDNA B930092H01 gene [Source:MGI Symbol;Acc:MGI:4437738]	40.8741	5.35311	1.66028e-06
Pla2g2e	phospholipase A2, group IIE [Source:MGI Symbol;Acc:MGI:1349660]	40.7873	5.35005	4.03311e-05
C130026I21Rik	RIKEN cDNA C130026I21 gene [Source:MGI Symbol;Acc:MGI:3612702]	40.142	5.32704	3.42243e-10
Gm15433	predicted pseudogene 15433 [Source:MGI Symbol;Acc:MGI:3705860]	39.085	5.28854	0.00264914
Gm36827	predicted gene, 36827 [Source:MGI Symbol;Acc:MGI:5595986]	38.4453	5.26474	0.000523696
Vsig8	V-set and immunoglobulin domain containing 8 [Source:MGI Symbol;Acc:MGI:3642995]	38.3794	5.26226	0.0134408
Gm12236	predicted gene 12236 [Source:MGI Symbol;Acc:MGI:3651548]	38.3229	5.26013	0.000597116
Sez6l	seizure related 6 homolog like [Source:MGI Symbol;Acc:MGI:1935121]	38.2857	5.25873	9.65464e-10
Kcnj15	potassium inwardly-rectifying channel, subfamily J, member 15 [Source:MGI Symbol;Acc:MGI:1310000]	36.5103	5.19023	2.27058e-09
Nmrk2	nicotinamide riboside kinase 2 [Source:MGI Symbol;Acc:MGI:1916814]	35.4352	5.14711	0.0472899
Nepn	nephrocan [Source:MGI Symbol;Acc:MGI:1913900]	34.518	5.10928	0.00102432
Acan	aggrecan [Source:MGI Symbol;Acc:MGI:99602]	33.112	5.04928	0.0291224
Ncan	neurocan [Source:MGI Symbol;Acc:MGI:104694]	33.0489	5.04653	0.00119631
Cngb3	cyclic nucleotide gated channel beta 3 [Source:MGI Symbol;Acc:MGI:1353562]	32.6583	5.02938	0.0169858
4930502E18Rik	RIKEN cDNA 4930502E18 gene [Source:MGI Symbol;Acc:MGI:1922263]	31.7473	4.98856	0.00041828
Gm5627	predicted gene 5627 [Source:MGI Symbol;Acc:MGI:3645308]	31.743	4.98837	0.00134291
Bpifb6	BPI fold containing family B, member 6 [Source:MGI Symbol;Acc:MGI:2684965]	31.0492	4.95648	0.0101934
Gm13709	predicted gene 13709 [Source:MGI Symbol;Acc:MGI:3651118]	28.0806	4.8115	0.0126609
Kcnj14	potassium inwardly-rectifying channel, subfamily J, member 14 [Source:MGI Symbol;Acc:MGI:2384820]	26.4036	4.72266	0.00220878
Pdcd1lg2	programmed cell death 1 ligand 2 [Source:MGI Symbol;Acc:MGI:1930125]	26.2733	4.71553	0.0390499
Gm20056	predicted gene, 20056 [Source:MGI Symbol;Acc:MGI:5012241]	25.4785	4.67121	3.05813e-05
Mageb18	melanoma antigen family B, 18 [Source:MGI Symbol;Acc:MGI:3045344]	25.1301	4.65134	0.00197485
Iglv1	immunoglobulin lambda variable 1 [Source:MGI Symbol;Acc:MGI:96530]	24.9836	4.64291	0.0423872
Ptchd4	patched domain containing 4 [Source:MGI Symbol;Acc:MGI:1920485]	24.8011	4.63233	4.52922e-07
Aqp4	aquaporin 4 [Source:MGI Symbol;Acc:MGI:107387]	24.6225	4.6219	0.0383776
Trim67	tripartite motif-containing 67 [Source:MGI Symbol;Acc:MGI:3045323]	24.4954	4.61444	0.000172117
Igha	immunoglobulin heavy constant alpha [Source:MGI Symbol;Acc:MGI:96444]	23.858	4.5764	0.00487738
Crtac1	cartilage acidic protein 1 [Source:MGI Symbol;Acc:MGI:1920082]	23.5502	4.55767	8.99601e-06
Dusp9	dual specificity phosphatase 9 [Source:MGI Symbol;Acc:MGI:2387107]	23.5207	4.55586	2.33671e-07
Gm28802	predicted gene 28802 [Source:MGI Symbol;Acc:MGI:5579508]	22.66	4.50207	0.000463843
Ankdd1a	ankyrin repeat and death domain containing 1A [Source:MGI Symbol;Acc:MGI:2686319]	22.363	4.48304	0.0075094
Tm4sf19	transmembrane 4 L six family member 19 [Source:MGI Symbol;Acc:MGI:3645933]	22.2322	4.47458	0.00054502
Gm13703	predicted gene 13703 [Source:MGI Symbol;Acc:MGI:3651307]	21.7743	4.44456	0.00781243
Tshr	thyroid stimulating hormone receptor [Source:MGI Symbol;Acc:MGI:98849]	21.5649	4.43061	4.88431e-07
Atp1a4	ATPase, Na+/K+ transporting, alpha 4 polypeptide [Source:MGI Symbol;Acc:MGI:1351335]	21.2623	4.41023	0.00288152
Nnat	neuronatin [Source:MGI Symbol;Acc:MGI:104716]	20.3039	4.34368	2.73501e-09
Hydin	HYDIN, axonemal central pair apparatus protein [Source:MGI Symbol;Acc:MGI:2389007]	20.0694	4.32692	0.00253622
Chrm4	cholinergic receptor, muscarinic 4 [Source:MGI Symbol;Acc:MGI:88399]	19.6424	4.2959	0.0116239
Gsg1l	GSG1-like [Source:MGI Symbol;Acc:MGI:2685483]	19.6127	4.29371	0.0261972
Ighm	immunoglobulin heavy constant mu [Source:MGI Symbol;Acc:MGI:96448]	19.4948	4.28502	0.00794414
Rgs1	regulator of G-protein signaling 1 [Source:MGI Symbol;Acc:MGI:1354694]	18.897	4.24008	0.000106117
Prr16	proline rich 16 [Source:MGI Symbol;Acc:MGI:1918623]	18.6795	4.22338	1.88869e-06
Gm15519	predicted gene 15519 [Source:MGI Symbol;Acc:MGI:3782965]	18.3904	4.20088	5.22193e-08
Gm16026	predicted pseudogene 16026 [Source:MGI Symbol;Acc:MGI:3783243]	18.3389	4.19683	0.00198836
Cdsn	corneodesmosin [Source:MGI Symbol;Acc:MGI:3505689]	18.1923	4.18526	1.65317e-08
Tenm4	teneurin transmembrane protein 4 [Source:MGI Symbol;Acc:MGI:2447063]	17.9666	4.16725	2.44104e-12
Plppr4	phospholipid phosphatase related 4 [Source:MGI Symbol;Acc:MGI:106530]	17.9433	4.16537	0.00356683
Hp	haptoglobin [Source:MGI Symbol;Acc:MGI:96211]	17.5512	4.1335	0.000741938
Unc80	unc-80, NALCN activator [Source:MGI Symbol;Acc:MGI:2652882]	17.5473	4.13317	0.0103612
Car6	carbonic anhydrase 6 [Source:MGI Symbol;Acc:MGI:1333786]	16.8357	4.07345	0.00261696
Tmem52	transmembrane protein 52 [Source:MGI Symbol;Acc:MGI:1916921]	16.666	4.05883	0.0220194
St18	suppression of tumorigenicity 18 [Source:MGI Symbol;Acc:MGI:2446700]	16.5605	4.04968	0.00783174
Chst13	carbohydrate sulfotransferase 13 [Source:MGI Symbol;Acc:MGI:1919047]	16.5034	4.04469	0.00240946
A530040E14Rik	RIKEN cDNA A530040E14 gene [Source:MGI Symbol;Acc:MGI:3612703]	16.492	4.04369	0.00259057
Tinag	tubulointerstitial nephritis antigen [Source:MGI Symbol;Acc:MGI:1349477]	16.3632	4.03238	0.0498632
Zfp345	zinc finger protein 345 [Source:MGI Symbol;Acc:MGI:3652219]	16.2422	4.02168	0.0012071
Oxtr	oxytocin receptor [Source:MGI Symbol;Acc:MGI:109147]	16.1255	4.01127	0.00207175
Ocstamp	osteoclast stimulatory transmembrane protein [Source:MGI Symbol;Acc:MGI:1921864]	15.7063	3.97327	0.00729048
Gm10851	predicted gene 10851 [Source:MGI Symbol;Acc:MGI:3641824]	15.6721	3.97013	6.5186e-05
Klhl14	kelch-like 14 [Source:MGI Symbol;Acc:MGI:1921249]	15.5649	3.96023	0.00136465
Crisp2	cysteine-rich secretory protein 2 [Source:MGI Symbol;Acc:MGI:98815]	15.2281	3.92866	0.000943004
Dmrt2	doublesex and mab-3 related transcription factor 2 [Source:MGI Symbol;Acc:MGI:1330307]	15.2079	3.92675	2.70956e-08
Pramef12	PRAME family member 12 [Source:MGI Symbol;Acc:MGI:1924882]	14.6007	3.86797	6.03637e-05
Klf14	Kruppel-like factor 14 [Source:MGI Symbol;Acc:MGI:3577024]	14.355	3.84348	0.000858003
Gm5150	predicted gene 5150 [Source:MGI Symbol;Acc:MGI:3779469]	14.2832	3.83624	0.00221685
Mogat2	monoacylglycerol O-acyltransferase 2 [Source:MGI Symbol;Acc:MGI:2663253]	14.112	3.81885	0.000543388
Themis	thymocyte selection associated [Source:MGI Symbol;Acc:MGI:2443552]	13.8214	3.78883	0.00646379
Mc2r	melanocortin 2 receptor [Source:MGI Symbol;Acc:MGI:96928]	13.8003	3.78663	3.86501e-07
Gm45705	predicted gene 45705 [Source:MGI Symbol;Acc:MGI:5804820]	13.5453	3.75972	0.00781026
Gm15851	predicted gene 15851 [Source:MGI Symbol;Acc:MGI:3801734]	13.3756	3.74154	7.53622e-07
Got1l1	glutamic-oxaloacetic transaminase 1-like 1 [Source:MGI Symbol;Acc:MGI:1923865]	13.2368	3.72649	0.0082462
Ffar2	free fatty acid receptor 2 [Source:MGI Symbol;Acc:MGI:2441731]	13.0539	3.70641	3.43833e-07
Adh6b	alcohol dehydrogenase 6B (class V) [Source:MGI Symbol;Acc:MGI:2446626]	12.7569	3.6732	0.00495139
Gm14409	predicted gene 14409 [Source:MGI Symbol;Acc:MGI:3649811]	12.6926	3.66592	0.000251586
Slc16a12	solute carrier family 16 (monocarboxylic acid transporters), member 12 [Source:MGI Symbol;Acc:MGI:2147716]	12.5116	3.64519	7.13567e-05
Nat1	N-acetyl transferase 1 [Source:MGI Symbol;Acc:MGI:97279]	12.4744	3.6409	0.00511617
Gpr156	G protein-coupled receptor 156 [Source:MGI Symbol;Acc:MGI:2653880]	12.3725	3.62907	1.03391e-05
Npr3	natriuretic peptide receptor 3 [Source:MGI Symbol;Acc:MGI:97373]	12.2399	3.61351	1.29191e-06
Fam110c	family with sequence similarity 110, member C [Source:MGI Symbol;Acc:MGI:1918813]	12.1873	3.6073	0.00423166
Klra3	killer cell lectin-like receptor, subfamily A, member 3 [Source:MGI Symbol;Acc:MGI:101905]	12.1662	3.6048	0.0298106
Ctcflos	CCCTC-binding factor (zinc finger protein)-like, opposite strand [Source:MGI Symbol;Acc:MGI:1921411]	12.0752	3.59398	3.55004e-08
Dcstamp	dendrocyte expressed seven transmembrane protein [Source:MGI Symbol;Acc:MGI:1923016]	11.7207	3.55099	0.0108829
F7	coagulation factor VII [Source:MGI Symbol;Acc:MGI:109325]	11.6818	3.5462	0.00639661
Angptl3	angiopoietin-like 3 [Source:MGI Symbol;Acc:MGI:1353627]	11.6095	3.53723	0.000226165
Paqr9	progestin and adipoQ receptor family member IX [Source:MGI Symbol;Acc:MGI:1922802]	11.4814	3.52123	0.000590605
Gm37829	predicted gene, 37829 [Source:MGI Symbol;Acc:MGI:5611057]	11.4621	3.5188	0.0333087
Gm26708	predicted gene, 26708 [Source:MGI Symbol;Acc:MGI:5477202]	11.441	3.51614	0.000172994
Il5ra	interleukin 5 receptor, alpha [Source:MGI Symbol;Acc:MGI:96558]	11.4252	3.51415	0.0292024
Tbx5	T-box 5 [Source:MGI Symbol;Acc:MGI:102541]	11.3951	3.51034	0.00920179
Mmd	monocyte to macrophage differentiation-associated [Source:MGI Symbol;Acc:MGI:1914718]	11.131	3.47651	3.35693e-07
Lpgat1	lysophosphatidylglycerol acyltransferase 1 [Source:MGI Symbol;Acc:MGI:2446186]	11.0717	3.4688	1.27759e-07
Apol7c	apolipoprotein L 7c [Source:MGI Symbol;Acc:MGI:1920912]	11.0713	3.46875	0.00278453
Mest	mesoderm specific transcript [Source:MGI Symbol;Acc:MGI:96968]	10.8183	3.4354	0.000251717
Gas2l2	growth arrest-specific 2 like 2 [Source:MGI Symbol;Acc:MGI:3652048]	10.7967	3.43253	0.047981
Chrna5	cholinergic receptor, nicotinic, alpha polypeptide 5 [Source:MGI Symbol;Acc:MGI:87889]	10.7604	3.42766	0.0402323
Plin4	perilipin 4 [Source:MGI Symbol;Acc:MGI:1929709]	10.7235	3.42271	1.83238e-10
Plch2	phospholipase C, eta 2 [Source:MGI Symbol;Acc:MGI:2443078]	10.673	3.4159	0.00378879
2610016A17Rik	RIKEN cDNA 2610016A17 gene [Source:MGI Symbol;Acc:MGI:1919653]	10.5904	3.40468	1.33221e-06
Cd27	CD27 antigen [Source:MGI Symbol;Acc:MGI:88326]	10.5198	3.39503	0.0116923
Prokr2	prokineticin receptor 2 [Source:MGI Symbol;Acc:MGI:2181363]	10.501	3.39246	0.0472349
Cldn23	claudin 23 [Source:MGI Symbol;Acc:MGI:1919158]	10.4686	3.38799	0.0226257
NA	NA	10.4169	3.38085	0.000751228
Sycp3	synaptonemal complex protein 3 [Source:MGI Symbol;Acc:MGI:109542]	10.3935	3.37761	0.0292121
Timp4	tissue inhibitor of metalloproteinase 4 [Source:MGI Symbol;Acc:MGI:109125]	10.2442	3.35673	0.000160596
Thsd7b	thrombospondin, type I, domain containing 7B [Source:MGI Symbol;Acc:MGI:2443925]	10.23	3.35473	0.00848384
Aqp7	aquaporin 7 [Source:MGI Symbol;Acc:MGI:1314647]	10.2138	3.35244	7.58298e-05
Flacc1	flagellum associated containing coiled-coil domains 1 [Source:MGI Symbol;Acc:MGI:1918359]	10.0715	3.3322	2.60578e-05
Cd1d1	CD1d1 antigen [Source:MGI Symbol;Acc:MGI:107674]	9.90772	3.30855	1.09317e-05
Nos2	nitric oxide synthase 2, inducible [Source:MGI Symbol;Acc:MGI:97361]	9.87056	3.30313	9.3233e-05
Cxcl9	chemokine (C-X-C motif) ligand 9 [Source:MGI Symbol;Acc:MGI:1352449]	9.84995	3.30012	0.00724819
Cxcl2	chemokine (C-X-C motif) ligand 2 [Source:MGI Symbol;Acc:MGI:1340094]	9.84496	3.29938	0.0235748
Gm5460	predicted gene 5460 [Source:MGI Symbol;Acc:MGI:3643519]	9.7721	3.28867	0.000811551
Gm36640	predicted gene, 36640 [Source:MGI Symbol;Acc:MGI:5595799]	9.75279	3.28582	0.0378813
Kcne1l	potassium voltage-gated channel, Isk-related family, member 1-like, pseudogene [Source:MGI Symbol;Acc:MGI:1913490]	9.73029	3.28248	0.000736779
Itgax	integrin alpha X [Source:MGI Symbol;Acc:MGI:96609]	9.71144	3.27969	2.53895e-05
Dnajb13	DnaJ heat shock protein family (Hsp40) member B13 [Source:MGI Symbol;Acc:MGI:1916637]	9.6488	3.27035	0.000311518
Serpina3f	serine (or cysteine) peptidase inhibitor, clade A, member 3F [Source:MGI Symbol;Acc:MGI:2182838]	9.64014	3.26905	0.0404984
Alb	albumin [Source:MGI Symbol;Acc:MGI:87991]	9.57349	3.25905	3.85581e-07
Ugt1a6b	UDP glucuronosyltransferase 1 family, polypeptide A6B [Source:MGI Symbol;Acc:MGI:3580629]	9.49702	3.24747	0.000971837
Atp6v0d2	ATPase, H+ transporting, lysosomal V0 subunit D2 [Source:MGI Symbol;Acc:MGI:1924415]	9.49427	3.24706	0.000118841
Gm47815	predicted gene, 47815 [Source:MGI Symbol;Acc:MGI:6097001]	9.46507	3.24261	0.012301
Igfals	insulin-like growth factor binding protein, acid labile subunit [Source:MGI Symbol;Acc:MGI:107973]	9.46312	3.24232	0.000817676
Arl14epl	ADP-ribosylation factor-like 14 effector protein-like [Source:MGI Symbol;Acc:MGI:2685795]	9.444	3.2394	0.00449334
Klhdc7a	kelch domain containing 7A [Source:MGI Symbol;Acc:MGI:2444612]	9.44339	3.2393	1.67688e-08
Slc8a1	solute carrier family 8 (sodium/calcium exchanger), member 1 [Source:MGI Symbol;Acc:MGI:107956]	9.36812	3.22776	2.46699e-07
Klb	klotho beta [Source:MGI Symbol;Acc:MGI:1932466]	9.36552	3.22736	0.000178932
Wfdc21	WAP four-disulfide core domain 21 [Source:MGI Symbol;Acc:MGI:1913357]	9.35504	3.22574	0.0103661
Gm22482	predicted gene, 22482 [Source:MGI Symbol;Acc:MGI:5452259]	9.1664	3.19636	1.80012e-05
Acaa1b	acetyl-Coenzyme A acyltransferase 1B [Source:MGI Symbol;Acc:MGI:3605455]	9.1098	3.18742	0.000647054
Trhde	TRH-degrading enzyme [Source:MGI Symbol;Acc:MGI:2384311]	9.0271	3.17426	0.000366806
Serpina3h	serine (or cysteine) peptidase inhibitor, clade A, member 3H [Source:MGI Symbol;Acc:MGI:2182839]	9.00395	3.17056	0.0396347
Apol6	apolipoprotein L 6 [Source:MGI Symbol;Acc:MGI:1919189]	8.98142	3.16694	3.5083e-06
Gm5547	predicted gene 5547 [Source:MGI Symbol;Acc:MGI:3648206]	8.96183	3.16379	0.00211281
2001-03-01	mitochondrial amidoxime reducing component 1 [Source:MGI Symbol;Acc:MGI:1913362]	8.93607	3.15964	0.000608738
Serpina3i	serine (or cysteine) peptidase inhibitor, clade A, member 3I [Source:MGI Symbol;Acc:MGI:2182841]	8.92465	3.1578	0.0391106
Cd36	CD36 molecule [Source:MGI Symbol;Acc:MGI:107899]	8.89609	3.15317	6.03423e-05
A530032D15Rik	RIKEN cDNA A530032D15Rik gene [Source:MGI Symbol;Acc:MGI:3037746]	8.83919	3.14391	0.0214853
B430212C06Rik	RIKEN cDNA B430212C06 gene [Source:MGI Symbol;Acc:MGI:2442134]	8.80629	3.13853	0.0218067
Trim29	tripartite motif-containing 29 [Source:MGI Symbol;Acc:MGI:1919419]	8.80327	3.13804	0.000951479
Eya1	EYA transcriptional coactivator and phosphatase 1 [Source:MGI Symbol;Acc:MGI:109344]	8.75405	3.12995	0.00124002
Ccl8	chemokine (C-C motif) ligand 8 [Source:MGI Symbol;Acc:MGI:101878]	8.72871	3.12577	0.00355132
Asic2	acid-sensing (proton-gated) ion channel 2 [Source:MGI Symbol;Acc:MGI:1100867]	8.64467	3.11181	5.46825e-05
Gm26588	predicted gene, 26588 [Source:MGI Symbol;Acc:MGI:5477082]	8.64081	3.11117	0.000113405
Serpine1	serine (or cysteine) peptidase inhibitor, clade E, member 1 [Source:MGI Symbol;Acc:MGI:97608]	8.55794	3.09726	1.83311e-10
Plekhg6	pleckstrin homology domain containing, family G (with RhoGef domain) member 6 [Source:MGI Symbol;Acc:MGI:2682298]	8.50807	3.08883	0.00198289
Mal2	mal, T cell differentiation protein 2 [Source:MGI Symbol;Acc:MGI:2146021]	8.48663	3.08519	0.00191399
Cacna1e	calcium channel, voltage-dependent, R type, alpha 1E subunit [Source:MGI Symbol;Acc:MGI:106217]	8.45168	3.07924	7.96173e-06
Cpa2	carboxypeptidase A2, pancreatic [Source:MGI Symbol;Acc:MGI:3617840]	8.44021	3.07728	0.000278975
Fgf13	fibroblast growth factor 13 [Source:MGI Symbol;Acc:MGI:109178]	8.33736	3.05959	5.21806e-05
Dnajc6	DnaJ heat shock protein family (Hsp40) member C6 [Source:MGI Symbol;Acc:MGI:1919935]	8.33014	3.05834	0.000251717
Lpl	lipoprotein lipase [Source:MGI Symbol;Acc:MGI:96820]	8.30331	3.05369	0.000311518
Btnl9	butyrophilin-like 9 [Source:MGI Symbol;Acc:MGI:2442439]	8.27334	3.04847	0.00106177
Tmem45b	transmembrane protein 45b [Source:MGI Symbol;Acc:MGI:2384574]	8.24687	3.04385	6.95458e-05
Fam89a	family with sequence similarity 89, member A [Source:MGI Symbol;Acc:MGI:1916877]	8.1326	3.02372	6.01152e-05
A530053G22Rik	RIKEN cDNA A530053G22 gene [Source:MGI Symbol;Acc:MGI:2443347]	8.12024	3.02152	0.000200228
Sirpb1c	signal-regulatory protein beta 1C [Source:MGI Symbol;Acc:MGI:3807521]	8.09012	3.01616	9.77596e-06
8030423F21Rik	RIKEN cDNA 8030423F21 gene [Source:MGI Symbol;Acc:MGI:2443206]	8.07563	3.01357	0.0043107
Barx2	BarH-like homeobox 2 [Source:MGI Symbol;Acc:MGI:109617]	8.0062	3.00112	0.00482706
Angptl8	angiopoietin-like 8 [Source:MGI Symbol;Acc:MGI:3643534]	7.99344	2.99882	0.0324655
Aoc3	amine oxidase, copper containing 3 [Source:MGI Symbol;Acc:MGI:1306797]	7.9729	2.9951	7.88202e-12
B430119L08Rik	RIKEN cDNA B430119L08 gene [Source:MGI Symbol;Acc:MGI:2441857]	7.91556	2.98469	0.000762038
F2rl3	coagulation factor II (thrombin) receptor-like 3 [Source:MGI Symbol;Acc:MGI:1298207]	7.91153	2.98396	0.0091002
Dgat2	diacylglycerol O-acyltransferase 2 [Source:MGI Symbol;Acc:MGI:1915050]	7.894	2.98076	0.00249347
Hsd11b2	hydroxysteroid 11-beta dehydrogenase 2 [Source:MGI Symbol;Acc:MGI:104720]	7.88538	2.97918	0.00660967
Gm45104	predicted gene 45104 [Source:MGI Symbol;Acc:MGI:5753680]	7.88033	2.97826	0.000333806
Krt79	keratin 79 [Source:MGI Symbol;Acc:MGI:2385030]	7.84992	2.97268	0.0170957
Gm9951	predicted gene 9951 [Source:MGI Symbol;Acc:MGI:3641827]	7.82308	2.96774	0.000698634
Il1rn	interleukin 1 receptor antagonist [Source:MGI Symbol;Acc:MGI:96547]	7.711	2.94692	0.00203869
4930474H06Rik	RIKEN cDNA 4930474H06 gene [Source:MGI Symbol;Acc:MGI:3697432]	7.71012	2.94675	0.00696867
Trarg1	trafficking regulator of GLUT4 (SLC2A4) 1 [Source:MGI Symbol;Acc:MGI:3029307]	7.70802	2.94636	4.51174e-06
Fyb2	FYN binding protein 2 [Source:MGI Symbol;Acc:MGI:2685466]	7.66956	2.93914	0.0282846
Il1r2	interleukin 1 receptor, type II [Source:MGI Symbol;Acc:MGI:96546]	7.61497	2.92884	8.92064e-05
Ces1a	carboxylesterase 1A [Source:MGI Symbol;Acc:MGI:3648919]	7.59655	2.92534	0.0461037
Gm45716	predicted gene 45716 [Source:MGI Symbol;Acc:MGI:5804831]	7.58141	2.92247	1.00196e-06
Gdf5	growth differentiation factor 5 [Source:MGI Symbol;Acc:MGI:95688]	7.55591	2.9176	0.0449907
Fsd2	fibronectin type III and SPRY domain containing 2 [Source:MGI Symbol;Acc:MGI:2444310]	7.55537	2.9175	0.0447053
Synpo2	synaptopodin 2 [Source:MGI Symbol;Acc:MGI:2153070]	7.55111	2.91669	7.62322e-08
Gm4316	predicted gene 4316 [Source:MGI Symbol;Acc:MGI:3782497]	7.52102	2.91093	0.0399015
Ctcfl	CCCTC-binding factor (zinc finger protein)-like [Source:MGI Symbol;Acc:MGI:3652571]	7.50593	2.90803	0.00850033
Ugt3a2	UDP glycosyltransferases 3 family, polypeptide A2 [Source:MGI Symbol;Acc:MGI:2145969]	7.48741	2.90447	0.000462164
Hsf2bp	heat shock transcription factor 2 binding protein [Source:MGI Symbol;Acc:MGI:1921627]	7.43731	2.89478	0.035847
Hspd1-ps4	heat shock protein 1 (chaperonin), pseudogene 4 [Source:MGI Symbol;Acc:MGI:3649750]	7.32705	2.87323	2.85957e-05
Irx3	Iroquois related homeobox 3 [Source:MGI Symbol;Acc:MGI:1197522]	7.31712	2.87128	0.00294937
Fcor	Foxo1 corepressor [Source:MGI Symbol;Acc:MGI:1915484]	7.31392	2.87064	0.000958849
Car12	carbonic anhydrase 12 [Source:MGI Symbol;Acc:MGI:1923709]	7.28002	2.86394	0.00629787
Gm40761	predicted gene, 40761 [Source:MGI Symbol;Acc:MGI:5623646]	7.19508	2.84701	0.0035908
Gm10240	predicted gene 10240 [Source:MGI Symbol;Acc:MGI:3704454]	7.15037	2.83802	0.00762329
Pakap	paralemmin A kinase anchor protein [Source:MGI Symbol;Acc:MGI:5141924]	7.06788	2.82128	0.00321168
Eepd1	endonuclease/exonuclease/phosphatase family domain containing 1 [Source:MGI Symbol;Acc:MGI:1914734]	7.06608	2.82091	2.20092e-08
BC035947	cDNA sequence BC035947 [Source:MGI Symbol;Acc:MGI:2652858]	7.04041	2.81566	3.33712e-05
Gimap7	GTPase, IMAP family member 7 [Source:MGI Symbol;Acc:MGI:1349657]	7.01095	2.80961	0.0376331
Rasd1	RAS, dexamethasone-induced 1 [Source:MGI Symbol;Acc:MGI:1270848]	6.96642	2.80042	0.000129133
Gimap1os	GTPase, IMAP family member 1, opposite strand [Source:MGI Symbol;Acc:MGI:3781523]	6.94823	2.79665	0.0177415
Gipr	gastric inhibitory polypeptide receptor [Source:MGI Symbol;Acc:MGI:1352753]	6.89338	2.78521	0.0232831
Ina	internexin neuronal intermediate filament protein, alpha [Source:MGI Symbol;Acc:MGI:96568]	6.84369	2.77477	0.0144748
Orm1	orosomucoid 1 [Source:MGI Symbol;Acc:MGI:97443]	6.82699	2.77125	0.0237156
Cd209e	CD209e antigen [Source:MGI Symbol;Acc:MGI:2157948]	6.81331	2.76836	0.0017116
Tmem182	transmembrane protein 182 [Source:MGI Symbol;Acc:MGI:1923725]	6.75414	2.75577	0.0220194
Adipoq	adiponectin, C1Q and collagen domain containing [Source:MGI Symbol;Acc:MGI:106675]	6.73395	2.75145	0.000278975
Fam83a	family with sequence similarity 83, member A [Source:MGI Symbol;Acc:MGI:2447773]	6.69901	2.74395	6.18441e-05
Gm14221	predicted gene 14221 [Source:MGI Symbol;Acc:MGI:3650696]	6.65545	2.73454	0.00532626
Iqsec3	IQ motif and Sec7 domain 3 [Source:MGI Symbol;Acc:MGI:2677208]	6.63525	2.73015	0.00990109
Topaz1	testis and ovary specific PAZ domain containing 1 [Source:MGI Symbol;Acc:MGI:3779933]	6.63442	2.72997	0.0393613
Gdf3	growth differentiation factor 3 [Source:MGI Symbol;Acc:MGI:95686]	6.57538	2.71708	0.0322131
Bdnf	brain derived neurotrophic factor [Source:MGI Symbol;Acc:MGI:88145]	6.5554	2.71268	0.0124734
Gldc	glycine decarboxylase [Source:MGI Symbol;Acc:MGI:1341155]	6.55117	2.71175	0.000247649
Abcc2	ATP-binding cassette, sub-family C (CFTR/MRP), member 2 [Source:MGI Symbol;Acc:MGI:1352447]	6.54092	2.70949	0.0198516
Unc79	unc-79 homolog [Source:MGI Symbol;Acc:MGI:2684729]	6.53673	2.70857	4.19986e-05
Hsf3	heat shock transcription factor 3 [Source:MGI Symbol;Acc:MGI:3045337]	6.52746	2.70652	0.00641419
Gm12068	predicted gene 12068 [Source:MGI Symbol;Acc:MGI:3649823]	6.47044	2.69386	0.000544291
Stra6l	STRA6-like [Source:MGI Symbol;Acc:MGI:1921402]	6.25787	2.64567	0.00426701
Hapln4	hyaluronan and proteoglycan link protein 4 [Source:MGI Symbol;Acc:MGI:2679531]	6.18323	2.62836	0.0214853
Plin1	perilipin 1 [Source:MGI Symbol;Acc:MGI:1890505]	6.12782	2.61537	1.87221e-05
Ffar4	free fatty acid receptor 4 [Source:MGI Symbol;Acc:MGI:2147577]	6.11212	2.61167	0.000437357
Lrg1	leucine-rich alpha-2-glycoprotein 1 [Source:MGI Symbol;Acc:MGI:1924155]	6.09251	2.60704	1.03882e-07
Cfb	complement factor B [Source:MGI Symbol;Acc:MGI:105975]	6.06652	2.60087	2.25696e-06
Asb4	ankyrin repeat and SOCS box-containing 4 [Source:MGI Symbol;Acc:MGI:1929751]	6.04492	2.59572	0.00896229
Smoc1	SPARC related modular calcium binding 1 [Source:MGI Symbol;Acc:MGI:1929878]	6.01248	2.58796	3.6571e-16
Rpl39l	ribosomal protein L39-like [Source:MGI Symbol;Acc:MGI:1915422]	5.9746	2.57884	0.00742619
Abcd2	ATP-binding cassette, sub-family D (ALD), member 2 [Source:MGI Symbol;Acc:MGI:1349467]	5.91855	2.56524	5.10147e-05
Dock8	dedicator of cytokinesis 8 [Source:MGI Symbol;Acc:MGI:1921396]	5.87315	2.55413	1.26473e-08
Heph	hephaestin [Source:MGI Symbol;Acc:MGI:1332240]	5.84312	2.54674	0.000259066
Ccr3	chemokine (C-C motif) receptor 3 [Source:MGI Symbol;Acc:MGI:104616]	5.82953	2.54338	0.0295346
Aldh1a2	aldehyde dehydrogenase family 1, subfamily A2 [Source:MGI Symbol;Acc:MGI:107928]	5.77323	2.52938	3.57567e-05
Dpt	dermatopontin [Source:MGI Symbol;Acc:MGI:1928392]	5.75393	2.52455	0.000336497
Tnip3	TNFAIP3 interacting protein 3 [Source:MGI Symbol;Acc:MGI:3041165]	5.72562	2.51743	0.00198289
Cd8a	CD8 antigen, alpha chain [Source:MGI Symbol;Acc:MGI:88346]	5.71823	2.51557	0.00996785
Kcnk3	potassium channel, subfamily K, member 3 [Source:MGI Symbol;Acc:MGI:1100509]	5.6897	2.50835	3.59469e-06
Gm44956	predicted gene 44956 [Source:MGI Symbol;Acc:MGI:5753532]	5.68107	2.50616	0.00714084
Ghr	growth hormone receptor [Source:MGI Symbol;Acc:MGI:95708]	5.67843	2.50549	5.68674e-06
Rprml	reprimo-like [Source:MGI Symbol;Acc:MGI:2144486]	5.66015	2.50084	0.00274639
Cela1	chymotrypsin-like elastase family, member 1 [Source:MGI Symbol;Acc:MGI:95314]	5.64449	2.49684	1.04661e-05
Stc2	stanniocalcin 2 [Source:MGI Symbol;Acc:MGI:1316731]	5.63136	2.49348	1.40148e-08
Grhl1	grainyhead like transcription factor 1 [Source:MGI Symbol;Acc:MGI:2182540]	5.5961	2.48442	4.9397e-05
Scel	sciellin [Source:MGI Symbol;Acc:MGI:1891228]	5.58175	2.48072	1.19105e-06
Rasgrf1	RAS protein-specific guanine nucleotide-releasing factor 1 [Source:MGI Symbol;Acc:MGI:99694]	5.57997	2.48026	0.0418193
Lratd1	LRAT domain containing 1 [Source:MGI Symbol;Acc:MGI:2145011]	5.57752	2.47962	0.00139314
Dnase1l3	deoxyribonuclease 1-like 3 [Source:MGI Symbol;Acc:MGI:1314633]	5.56533	2.47647	0.0052378
Ranbp3l	RAN binding protein 3-like [Source:MGI Symbol;Acc:MGI:2444654]	5.56164	2.47551	0.0219539
Syt12	synaptotagmin XII [Source:MGI Symbol;Acc:MGI:2159601]	5.55399	2.47352	0.000225093
Ptger3	prostaglandin E receptor 3 (subtype EP3) [Source:MGI Symbol;Acc:MGI:97795]	5.54076	2.47008	0.00177052
Grid1	glutamate receptor, ionotropic, delta 1 [Source:MGI Symbol;Acc:MGI:95812]	5.53399	2.46832	1.30692e-05
Rhbdl2	rhomboid like 2 [Source:MGI Symbol;Acc:MGI:3608413]	5.53336	2.46816	0.0396142
Cd28	CD28 antigen [Source:MGI Symbol;Acc:MGI:88327]	5.48626	2.45582	0.000665185
BB218582	expressed sequence BB218582 [Source:MGI Symbol;Acc:MGI:2139448]	5.45941	2.44875	0.0120631
Dnmt3l	DNA (cytosine-5-)-methyltransferase 3-like [Source:MGI Symbol;Acc:MGI:1859287]	5.45235	2.44688	0.0399383
Nphs2	nephrosis 2, podocin [Source:MGI Symbol;Acc:MGI:2157018]	5.45197	2.44678	0.031915
Lipe	lipase, hormone sensitive [Source:MGI Symbol;Acc:MGI:96790]	5.42097	2.43855	8.12e-06
Gm16163	predicted gene 16163 [Source:MGI Symbol;Acc:MGI:3833836]	5.41515	2.437	0.00979061
Dct	dopachrome tautomerase [Source:MGI Symbol;Acc:MGI:102563]	5.40028	2.43303	0.0445293
Bcl11b	B cell leukemia/lymphoma 11B [Source:MGI Symbol;Acc:MGI:1929913]	5.35272	2.42027	0.0423457
Serpina3c	serine (or cysteine) peptidase inhibitor, clade A, member 3C [Source:MGI Symbol;Acc:MGI:102848]	5.34407	2.41794	0.00495139
Sdsl	serine dehydratase-like [Source:MGI Symbol;Acc:MGI:2182607]	5.34335	2.41774	0.00170917
Cib2	calcium and integrin binding family member 2 [Source:MGI Symbol;Acc:MGI:1929293]	5.31788	2.41085	0.00385737
5033425B01Rik	RIKEN cDNA 5033425B01 gene [Source:MGI Symbol;Acc:MGI:1921983]	5.30405	2.40709	0.000102961
Cidec	cell death-inducing DFFA-like effector c [Source:MGI Symbol;Acc:MGI:95585]	5.2994	2.40583	0.00349532
Gm31522	predicted gene, 31522 [Source:MGI Symbol;Acc:MGI:5590681]	5.29596	2.40489	0.0103111
Cd200r1	CD200 receptor 1 [Source:MGI Symbol;Acc:MGI:1889024]	5.2904	2.40338	0.000159877
Fgf10	fibroblast growth factor 10 [Source:MGI Symbol;Acc:MGI:1099809]	5.25707	2.39426	0.00375936
Gm42778	predicted gene 42778 [Source:MGI Symbol;Acc:MGI:5662915]	5.25561	2.39386	0.000566393
Gm12758	predicted gene 12758 [Source:MGI Symbol;Acc:MGI:3702543]	5.23382	2.38786	0.00508935
Cdh23	cadherin 23 (otocadherin) [Source:MGI Symbol;Acc:MGI:1890219]	5.19533	2.37722	0.000441475
Pnpla3	patatin-like phospholipase domain containing 3 [Source:MGI Symbol;Acc:MGI:2151796]	5.15753	2.36668	0.0214853
Dram1	DNA-damage regulated autophagy modulator 1 [Source:MGI Symbol;Acc:MGI:1918962]	5.11912	2.3559	1.52633e-06
Phex	phosphate regulating endopeptidase homolog, X-linked [Source:MGI Symbol;Acc:MGI:107489]	5.10592	2.35217	0.00110513
Cd247	CD247 antigen [Source:MGI Symbol;Acc:MGI:88334]	5.07321	2.3429	0.00630969
Pparg	peroxisome proliferator activated receptor gamma [Source:MGI Symbol;Acc:MGI:97747]	5.06303	2.34	0.000295858
Slc1a1	solute carrier family 1 (neuronal/epithelial high affinity glutamate transporter, system Xag), member 1 [Source:MGI Symbol;Acc:MGI:105083]	5.0566	2.33817	0.0365333
Adam8	a disintegrin and metallopeptidase domain 8 [Source:MGI Symbol;Acc:MGI:107825]	5.04563	2.33503	0.00187248
Gm3289	predicted gene 3289 [Source:MGI Symbol;Acc:MGI:3781467]	5.04	2.33342	0.000707044
Cxcr6	chemokine (C-X-C motif) receptor 6 [Source:MGI Symbol;Acc:MGI:1934582]	5.03326	2.33149	0.00058803
Lnx1	ligand of numb-protein X 1 [Source:MGI Symbol;Acc:MGI:1278335]	5.00916	2.32457	0.00151986
Fabp4	fatty acid binding protein 4, adipocyte [Source:MGI Symbol;Acc:MGI:88038]	4.97372	2.31433	0.00139998
Pcdh12	protocadherin 12 [Source:MGI Symbol;Acc:MGI:1855700]	4.97356	2.31428	0.000125829
Ltc4s	leukotriene C4 synthase [Source:MGI Symbol;Acc:MGI:107498]	4.9674	2.31249	1.82071e-08
Dnah3	dynein, axonemal, heavy chain 3 [Source:MGI Symbol;Acc:MGI:2683040]	4.94553	2.30613	0.00811515
Gabbr2	gamma-aminobutyric acid (GABA) B receptor, 2 [Source:MGI Symbol;Acc:MGI:2386030]	4.91987	2.29862	0.0401144
Gm8162	predicted gene 8162 [Source:MGI Symbol;Acc:MGI:3644710]	4.91301	2.29661	0.000546514
Ikzf3	IKAROS family zinc finger 3 [Source:MGI Symbol;Acc:MGI:1342542]	4.89622	2.29167	0.0301686
Slc44a3	solute carrier family 44, member 3 [Source:MGI Symbol;Acc:MGI:2384860]	4.89051	2.28998	0.00105255
Gata3	GATA binding protein 3 [Source:MGI Symbol;Acc:MGI:95663]	4.8134	2.26706	5.76661e-05
Pkp2	plakophilin 2 [Source:MGI Symbol;Acc:MGI:1914701]	4.81258	2.26681	4.47203e-09
Myom3	myomesin family, member 3 [Source:MGI Symbol;Acc:MGI:2685280]	4.80021	2.2631	0.000437357
Alox15	arachidonate 15-lipoxygenase [Source:MGI Symbol;Acc:MGI:87997]	4.79245	2.26076	0.0480161
Trbc1	T cell receptor beta, constant region 1 [Source:MGI Symbol;Acc:MGI:4439726]	4.79181	2.26057	0.0295648
Dusp10	dual specificity phosphatase 10 [Source:MGI Symbol;Acc:MGI:1927070]	4.78587	2.25878	6.09842e-14
Rasl10b	RAS-like, family 10, member B [Source:MGI Symbol;Acc:MGI:2685575]	4.78545	2.25865	0.0117977
Pmaip1	phorbol-12-myristate-13-acetate-induced protein 1 [Source:MGI Symbol;Acc:MGI:1930146]	4.77988	2.25697	0.00296065
Gm5424	predicted gene 5424 [Source:MGI Symbol;Acc:MGI:3643173]	4.77839	2.25652	0.00506715
Podnl1	podocan-like 1 [Source:MGI Symbol;Acc:MGI:2685352]	4.77496	2.25549	0.0063732
En1	engrailed 1 [Source:MGI Symbol;Acc:MGI:95389]	4.77309	2.25492	0.0272475
Il7r	interleukin 7 receptor [Source:MGI Symbol;Acc:MGI:96562]	4.77303	2.25491	0.00123984
Slc7a10	solute carrier family 7 (cationic amino acid transporter, y+ system), member 10 [Source:MGI Symbol;Acc:MGI:1858261]	4.75438	2.24926	0.000729603
C130021I20Rik	Riken cDNA C130021I20 gene [Source:MGI Symbol;Acc:MGI:3639863]	4.72109	2.23912	0.0487896
NA	NA	4.71143	2.23616	0.00428647
Hdac9	histone deacetylase 9 [Source:MGI Symbol;Acc:MGI:1931221]	4.70083	2.23291	2.30295e-07
Dhrs9	dehydrogenase/reductase (SDR family) member 9 [Source:MGI Symbol;Acc:MGI:2442798]	4.69127	2.22998	0.0327267
A530016L24Rik	RIKEN cDNA A530016L24 gene [Source:MGI Symbol;Acc:MGI:2443020]	4.6803	2.2266	0.00536307
Tmem82	transmembrane protein 82 [Source:MGI Symbol;Acc:MGI:2384869]	4.66733	2.2226	0.0291616
Tnfrsf18	tumor necrosis factor receptor superfamily, member 18 [Source:MGI Symbol;Acc:MGI:894675]	4.66579	2.22212	0.0140872
Slc16a10	solute carrier family 16 (monocarboxylic acid transporters), member 10 [Source:MGI Symbol;Acc:MGI:1919722]	4.65748	2.21955	1.05562e-07
Gm16263	predicted gene 16263 [Source:MGI Symbol;Acc:MGI:3826536]	4.65677	2.21933	0.0177942
Clec9a	C-type lectin domain family 9, member a [Source:MGI Symbol;Acc:MGI:2444608]	4.65371	2.21838	0.000225675
Sim2	single-minded family bHLH transcription factor 2 [Source:MGI Symbol;Acc:MGI:98307]	4.65084	2.21749	0.000858003
A530020G20Rik	RIKEN cDNA A530020G20 gene [Source:MGI Symbol;Acc:MGI:2442825]	4.6239	2.20911	3.09888e-06
Klhl32	kelch-like 32 [Source:MGI Symbol;Acc:MGI:3612790]	4.61519	2.20639	0.0147566
Pira2	paired-Ig-like receptor A2 [Source:MGI Symbol;Acc:MGI:1195970]	4.60827	2.20423	0.0370758
Glb1l2	galactosidase, beta 1-like 2 [Source:MGI Symbol;Acc:MGI:2388283]	4.6074	2.20395	0.000522049
Rspo2	R-spondin 2 [Source:MGI Symbol;Acc:MGI:1922667]	4.59025	2.19857	0.0467008
Spaca1	sperm acrosome associated 1 [Source:MGI Symbol;Acc:MGI:1914902]	4.58147	2.19581	0.00164672
Nxpe5	neurexophilin and PC-esterase domain family, member 5 [Source:MGI Symbol;Acc:MGI:3584036]	4.57303	2.19315	0.00088046
Vwa3a	von Willebrand factor A domain containing 3A [Source:MGI Symbol;Acc:MGI:3041229]	4.55639	2.18789	0.00236158
Btc	betacellulin, epidermal growth factor family member [Source:MGI Symbol;Acc:MGI:99439]	4.51415	2.17445	3.33384e-11
Pm20d1	peptidase M20 domain containing 1 [Source:MGI Symbol;Acc:MGI:2442939]	4.50907	2.17283	0.000437357
Pianp	PILR alpha associated neural protein [Source:MGI Symbol;Acc:MGI:2441908]	4.49319	2.16774	9.45332e-05
Nnmt	nicotinamide N-methyltransferase [Source:MGI Symbol;Acc:MGI:1099443]	4.47342	2.16138	5.62072e-05
Drd1	dopamine receptor D1 [Source:MGI Symbol;Acc:MGI:99578]	4.45911	2.15676	0.00871313
Slc9a2	solute carrier family 9 (sodium/hydrogen exchanger), member 2 [Source:MGI Symbol;Acc:MGI:105075]	4.43528	2.14902	0.0317442
Pfkfb3	6-phosphofructo-2-kinase/fructose-2,6-biphosphatase 3 [Source:MGI Symbol;Acc:MGI:2181202]	4.42692	2.1463	3.74361e-06
Gm37125	predicted gene, 37125 [Source:MGI Symbol;Acc:MGI:5610353]	4.40483	2.13909	0.0170614
Ankef1	ankyrin repeat and EF-hand domain containing 1 [Source:MGI Symbol;Acc:MGI:2441685]	4.39221	2.13495	0.00316426
Hebp1	heme binding protein 1 [Source:MGI Symbol;Acc:MGI:1333880]	4.36737	2.12676	0.000132199
Gadl1	glutamate decarboxylase-like 1 [Source:MGI Symbol;Acc:MGI:1920998]	4.35934	2.12411	0.00883305
Cdk18	cyclin-dependent kinase 18 [Source:MGI Symbol;Acc:MGI:97518]	4.35581	2.12294	0.000390936
Npas2	neuronal PAS domain protein 2 [Source:MGI Symbol;Acc:MGI:109232]	4.33504	2.11605	2.41164e-05
Rai2	retinoic acid induced 2 [Source:MGI Symbol;Acc:MGI:1344378]	4.31636	2.10982	6.95898e-17
Ccdc125	coiled-coil domain containing 125 [Source:MGI Symbol;Acc:MGI:1923291]	4.29778	2.10359	0.000212097
Gm42706	predicted gene 42706 [Source:MGI Symbol;Acc:MGI:5662843]	4.29248	2.10181	0.0117972
Ap1s3	adaptor-related protein complex AP-1, sigma 3 [Source:MGI Symbol;Acc:MGI:1891304]	4.29163	2.10153	0.0284578
Tjp3	tight junction protein 3 [Source:MGI Symbol;Acc:MGI:1351650]	4.28677	2.09989	0.030063
Rbp4	retinol binding protein 4, plasma [Source:MGI Symbol;Acc:MGI:97879]	4.26644	2.09303	2.39683e-05
Sez6	seizure related gene 6 [Source:MGI Symbol;Acc:MGI:104745]	4.26596	2.09287	0.000237375
Atp1a3	ATPase, Na+/K+ transporting, alpha 3 polypeptide [Source:MGI Symbol;Acc:MGI:88107]	4.25311	2.08852	0.000274729
Slc22a3	solute carrier family 22 (organic cation transporter), member 3 [Source:MGI Symbol;Acc:MGI:1333817]	4.24969	2.08736	0.000112245
Akr1c13	aldo-keto reductase family 1, member C13 [Source:MGI Symbol;Acc:MGI:1351662]	4.24836	2.08691	7.60956e-05
Pde2a	phosphodiesterase 2A, cGMP-stimulated [Source:MGI Symbol;Acc:MGI:2446107]	4.24334	2.0852	0.000279648
Ms4a4b	membrane-spanning 4-domains, subfamily A, member 4B [Source:MGI Symbol;Acc:MGI:1913083]	4.24126	2.08449	0.0368637
Alcam	activated leukocyte cell adhesion molecule [Source:MGI Symbol;Acc:MGI:1313266]	4.22297	2.07826	3.43926e-07
Slc28a2	solute carrier family 28 (sodium-coupled nucleoside transporter), member 2 [Source:MGI Symbol;Acc:MGI:1913105]	4.21995	2.07722	0.00060004
Fetub	fetuin beta [Source:MGI Symbol;Acc:MGI:1890221]	4.21105	2.07418	3.4352e-11
Srd5a2	steroid 5 alpha-reductase 2 [Source:MGI Symbol;Acc:MGI:2150380]	4.20484	2.07205	0.00195497
Card11	caspase recruitment domain family, member 11 [Source:MGI Symbol;Acc:MGI:1916978]	4.19591	2.06898	0.00920179
Col6a6	collagen, type VI, alpha 6 [Source:MGI Symbol;Acc:MGI:2444259]	4.19557	2.06887	0.0116923
Hgf	hepatocyte growth factor [Source:MGI Symbol;Acc:MGI:96079]	4.18156	2.06404	9.80986e-05
Il4i1	interleukin 4 induced 1 [Source:MGI Symbol;Acc:MGI:109552]	4.16199	2.05727	0.00871572
Ryr2	ryanodine receptor 2, cardiac [Source:MGI Symbol;Acc:MGI:99685]	4.14946	2.05292	0.017516
Gpihbp1	GPI-anchored HDL-binding protein 1 [Source:MGI Symbol;Acc:MGI:1915703]	4.14555	2.05156	0.0066777
Hist1h1e	histone cluster 1, H1e [Source:MGI Symbol;Acc:MGI:1931527]	4.1413	2.05008	0.0358919
Il7	interleukin 7 [Source:MGI Symbol;Acc:MGI:96561]	4.13504	2.0479	0.00349758
Il12rb2	interleukin 12 receptor, beta 2 [Source:MGI Symbol;Acc:MGI:1270861]	4.13081	2.04642	0.0249633
Mcoln2	mucolipin 2 [Source:MGI Symbol;Acc:MGI:1915529]	4.12272	2.04359	0.00421026
Pck1	phosphoenolpyruvate carboxykinase 1, cytosolic [Source:MGI Symbol;Acc:MGI:97501]	4.10957	2.03899	0.0248069
Svep1	sushi, von Willebrand factor type A, EGF and pentraxin domain containing 1 [Source:MGI Symbol;Acc:MGI:1928849]	4.09127	2.03255	1.37657e-07
Clec4n	C-type lectin domain family 4, member n [Source:MGI Symbol;Acc:MGI:1861231]	4.09088	2.03241	0.00535156
Cth	cystathionase (cystathionine gamma-lyase) [Source:MGI Symbol;Acc:MGI:1339968]	4.08446	2.03014	0.0210438
Mettl7a3	methyltransferase like 7A3 [Source:MGI Symbol;Acc:MGI:3710670]	4.07646	2.02732	0.0386913
Wdr93	WD repeat domain 93 [Source:MGI Symbol;Acc:MGI:3646885]	4.06713	2.02401	0.0406745
Cd209d	CD209d antigen [Source:MGI Symbol;Acc:MGI:2157947]	4.06553	2.02344	0.00423221
Acp5	acid phosphatase 5, tartrate resistant [Source:MGI Symbol;Acc:MGI:87883]	4.05324	2.01907	0.000696359
Kcnq1	potassium voltage-gated channel, subfamily Q, member 1 [Source:MGI Symbol;Acc:MGI:108083]	4.03948	2.01417	1.14456e-08
Cacna2d3	calcium channel, voltage-dependent, alpha2/delta subunit 3 [Source:MGI Symbol;Acc:MGI:1338890]	4.03355	2.01205	8.99601e-06
Sucnr1	succinate receptor 1 [Source:MGI Symbol;Acc:MGI:1934135]	4.03323	2.01193	0.000665848
Tcf15	transcription factor 15 [Source:MGI Symbol;Acc:MGI:104664]	4.03313	2.0119	0.00282716
Baiap3	BAI1-associated protein 3 [Source:MGI Symbol;Acc:MGI:2685783]	4.01114	2.00401	0.0284356
Unc119	unc-119 lipid binding chaperone [Source:MGI Symbol;Acc:MGI:1328357]	4.00931	2.00335	1.29191e-06
1700013H16Rik	RIKEN cDNA 1700013H16 gene [Source:MGI Symbol;Acc:MGI:1922764]	4.00794	2.00286	0.0126054
Cd209b	CD209b antigen [Source:MGI Symbol;Acc:MGI:1916415]	4.00392	2.00141	0.00147666
Cux2	cut-like homeobox 2 [Source:MGI Symbol;Acc:MGI:107321]	3.99266	1.99735	0.0048817
Nt5c1a	5'-nucleotidase, cytosolic IA [Source:MGI Symbol;Acc:MGI:2155700]	3.98479	1.9945	0.0354169
Frrs1	ferric-chelate reductase 1 [Source:MGI Symbol;Acc:MGI:108076]	3.96927	1.98887	4.38653e-06
Alkal2	ALK and LTK ligand 2 [Source:MGI Symbol;Acc:MGI:3697448]	3.96201	1.98623	0.000183715
Treml4	triggering receptor expressed on myeloid cells-like 4 [Source:MGI Symbol;Acc:MGI:1923239]	3.94796	1.98111	0.00963227
Adgre4	adhesion G protein-coupled receptor E4 [Source:MGI Symbol;Acc:MGI:1196464]	3.94778	1.98104	0.011056
Nrg4	neuregulin 4 [Source:MGI Symbol;Acc:MGI:1933833]	3.94329	1.9794	0.00297505
Myl4	myosin, light polypeptide 4 [Source:MGI Symbol;Acc:MGI:97267]	3.92739	1.97357	0.00297993
Stk32b	serine/threonine kinase 32B [Source:MGI Symbol;Acc:MGI:1927552]	3.92627	1.97316	1.48605e-06
Akr1c12	aldo-keto reductase family 1, member C12 [Source:MGI Symbol;Acc:MGI:1351661]	3.92476	1.9726	0.0289462
Ear2	eosinophil-associated, ribonuclease A family, member 2 [Source:MGI Symbol;Acc:MGI:108020]	3.92092	1.97119	0.0200218
Sec14l4	SEC14-like lipid binding 4 [Source:MGI Symbol;Acc:MGI:2144095]	3.90816	1.96649	0.0150523
Krt222	keratin 222 [Source:MGI Symbol;Acc:MGI:2442728]	3.9041	1.96499	0.0376331
Slc2a13	solute carrier family 2 (facilitated glucose transporter), member 13 [Source:MGI Symbol;Acc:MGI:2146030]	3.90397	1.96494	4.8801e-07
Dcst1	DC-STAMP domain containing 1 [Source:MGI Symbol;Acc:MGI:1925022]	3.89415	1.96131	0.0115955
Gm26648	predicted gene, 26648 [Source:MGI Symbol;Acc:MGI:5477142]	3.88554	1.95811	0.000256284
Gprin3	GPRIN family member 3 [Source:MGI Symbol;Acc:MGI:1924785]	3.8802	1.95613	0.00454542
Pon3	paraoxonase 3 [Source:MGI Symbol;Acc:MGI:106686]	3.87248	1.95326	0.000200893
Sirpb1a	signal-regulatory protein beta 1A [Source:MGI Symbol;Acc:MGI:2444824]	3.87113	1.95276	0.0162407
Nlrp10	NLR family, pyrin domain containing 10 [Source:MGI Symbol;Acc:MGI:2444084]	3.87107	1.95273	0.0139874
B430219N15Rik	RIKEN cDNA B430219N15 gene [Source:MGI Symbol;Acc:MGI:3697426]	3.83581	1.93953	0.016473
Fzd4	frizzled class receptor 4 [Source:MGI Symbol;Acc:MGI:108520]	3.83271	1.93836	1.05011e-06
Pstpip2	proline-serine-threonine phosphatase-interacting protein 2 [Source:MGI Symbol;Acc:MGI:1335088]	3.82953	1.93717	0.000510196
Adra2b	adrenergic receptor, alpha 2b [Source:MGI Symbol;Acc:MGI:87935]	3.81359	1.93115	0.0413692
Clybl	citrate lyase beta like [Source:MGI Symbol;Acc:MGI:1916884]	3.81239	1.9307	0.000171267
Plbd1	phospholipase B domain containing 1 [Source:MGI Symbol;Acc:MGI:1914107]	3.80044	1.92617	7.47853e-05
Adra1a	adrenergic receptor, alpha 1a [Source:MGI Symbol;Acc:MGI:104773]	3.7998	1.92592	0.00058803
Fmr1	fragile X mental retardation 1 [Source:MGI Symbol;Acc:MGI:95564]	3.79552	1.9243	6.88379e-05
Pde3b	phosphodiesterase 3B, cGMP-inhibited [Source:MGI Symbol;Acc:MGI:1333863]	3.791	1.92258	1.89249e-07
Cebpa	CCAAT/enhancer binding protein (C/EBP), alpha [Source:MGI Symbol;Acc:MGI:99480]	3.77493	1.91645	2.41025e-07
Hvcn1	hydrogen voltage-gated channel 1 [Source:MGI Symbol;Acc:MGI:1921346]	3.76142	1.91128	0.00492624
Dpf3	D4, zinc and double PHD fingers, family 3 [Source:MGI Symbol;Acc:MGI:1917377]	3.75855	1.91018	0.0136805
Sh3tc1	SH3 domain and tetratricopeptide repeats 1 [Source:MGI Symbol;Acc:MGI:2678949]	3.75223	1.90775	4.09021e-10
Trabd2b	TraB domain containing 2B [Source:MGI Symbol;Acc:MGI:3650152]	3.73602	1.9015	1.46506e-17
Gm36283	predicted gene, 36283 [Source:MGI Symbol;Acc:MGI:5595442]	3.72823	1.89849	0.0175764
Agt	angiotensinogen (serpin peptidase inhibitor, clade A, member 8) [Source:MGI Symbol;Acc:MGI:87963]	3.72652	1.89783	1.52633e-06
Cnr1	cannabinoid receptor 1 (brain) [Source:MGI Symbol;Acc:MGI:104615]	3.72329	1.89658	0.00247727
Lrrc9	leucine rich repeat containing 9 [Source:MGI Symbol;Acc:MGI:1925507]	3.71915	1.89497	0.00080647
Tnk1	tyrosine kinase, non-receptor, 1 [Source:MGI Symbol;Acc:MGI:1930958]	3.70995	1.8914	0.00059419
Rap1gap2	RAP1 GTPase activating protein 2 [Source:MGI Symbol;Acc:MGI:3028623]	3.70164	1.88817	6.511e-10
Lgals12	lectin, galactose binding, soluble 12 [Source:MGI Symbol;Acc:MGI:1929094]	3.69938	1.88728	0.000693067
Grtp1	GH regulated TBC protein 1 [Source:MGI Symbol;Acc:MGI:1914040]	3.69802	1.88675	8.34039e-06
Sel1l3	sel-1 suppressor of lin-12-like 3 (C. elegans) [Source:MGI Symbol;Acc:MGI:1916941]	3.68753	1.88265	0.0457348
Scd1	stearoyl-Coenzyme A desaturase 1 [Source:MGI Symbol;Acc:MGI:98239]	3.67909	1.87935	0.00262283
Cd209c	CD209c antigen [Source:MGI Symbol;Acc:MGI:2157945]	3.67317	1.87702	0.000654992
Tmem135	transmembrane protein 135 [Source:MGI Symbol;Acc:MGI:1920009]	3.66654	1.87442	4.50361e-06
Mfge8	milk fat globule-EGF factor 8 protein [Source:MGI Symbol;Acc:MGI:102768]	3.66203	1.87264	4.64096e-05
Krt4	keratin 4 [Source:MGI Symbol;Acc:MGI:96701]	3.65369	1.86935	0.0283504
Acvr1c	activin A receptor, type IC [Source:MGI Symbol;Acc:MGI:2661081]	3.64418	1.86559	0.00905183
Astn1	astrotactin 1 [Source:MGI Symbol;Acc:MGI:1098567]	3.63503	1.86197	0.0142218
Insl6	insulin-like 6 [Source:MGI Symbol;Acc:MGI:1351595]	3.63351	1.86136	0.00240316
Syt17	synaptotagmin XVII [Source:MGI Symbol;Acc:MGI:104966]	3.62507	1.85801	0.0428611
Car3	carbonic anhydrase 3 [Source:MGI Symbol;Acc:MGI:88270]	3.61972	1.85588	0.00985167
Sik2	salt inducible kinase 2 [Source:MGI Symbol;Acc:MGI:2445031]	3.61107	1.85243	2.65734e-11
Gm44250	predicted gene, 44250 [Source:MGI Symbol;Acc:MGI:5690642]	3.60945	1.85178	5.36106e-05
Cxcr3	chemokine (C-X-C motif) receptor 3 [Source:MGI Symbol;Acc:MGI:1277207]	3.60871	1.85149	0.0291423
Abhd15	abhydrolase domain containing 15 [Source:MGI Symbol;Acc:MGI:1914727]	3.60653	1.85061	1.11282e-06
Plin2	perilipin 2 [Source:MGI Symbol;Acc:MGI:87920]	3.59116	1.84445	0.000259728
P2ry10b	purinergic receptor P2Y, G-protein coupled 10B [Source:MGI Symbol;Acc:MGI:2441814]	3.58159	1.8406	0.027143
Ttpa	tocopherol (alpha) transfer protein [Source:MGI Symbol;Acc:MGI:1354168]	3.57802	1.83916	0.00287811
Tmem37	transmembrane protein 37 [Source:MGI Symbol;Acc:MGI:2157899]	3.57274	1.83703	0.000902843
Ccl22	chemokine (C-C motif) ligand 22 [Source:MGI Symbol;Acc:MGI:1306779]	3.56805	1.83514	0.0116239
Cd300lg	CD300 molecule like family member G [Source:MGI Symbol;Acc:MGI:1289168]	3.56135	1.83242	0.00119527
Jakmip3	janus kinase and microtubule interacting protein 3 [Source:MGI Symbol;Acc:MGI:1921254]	3.55551	1.83006	0.0479077
Cct6b	chaperonin containing Tcp1, subunit 6b (zeta) [Source:MGI Symbol;Acc:MGI:1329013]	3.55111	1.82827	0.00691743
Aff2	AF4/FMR2 family, member 2 [Source:MGI Symbol;Acc:MGI:1202294]	3.551	1.82822	2.62079e-06
Slc22a4	solute carrier family 22 (organic cation transporter), member 4 [Source:MGI Symbol;Acc:MGI:1353479]	3.55028	1.82793	0.000453962
Fry	FRY microtubule binding protein [Source:MGI Symbol;Acc:MGI:2443895]	3.53284	1.82083	2.99182e-11
Slamf8	SLAM family member 8 [Source:MGI Symbol;Acc:MGI:1921998]	3.53217	1.82056	0.00337435
Pik3ap1	phosphoinositide-3-kinase adaptor protein 1 [Source:MGI Symbol;Acc:MGI:1933177]	3.52956	1.81949	7.39565e-05
Gtse1	G two S phase expressed protein 1 [Source:MGI Symbol;Acc:MGI:1352755]	3.51867	1.81503	5.36106e-05
Tspan12	tetraspanin 12 [Source:MGI Symbol;Acc:MGI:1889818]	3.51556	1.81375	0.00029642
Gm20544	predicted gene 20544 [Source:MGI Symbol;Acc:MGI:5142009]	3.51293	1.81268	0.0115868
Acsl1	acyl-CoA synthetase long-chain family member 1 [Source:MGI Symbol;Acc:MGI:102797]	3.50096	1.80775	0.0183061
Prelp	proline arginine-rich end leucine-rich repeat [Source:MGI Symbol;Acc:MGI:2151110]	3.4923	1.80418	1.88811e-08
Gm9899	predicted gene 9899 [Source:MGI Symbol;Acc:MGI:3708711]	3.48307	1.80036	0.0270655
Nup210	nucleoporin 210 [Source:MGI Symbol;Acc:MGI:1859555]	3.48043	1.79927	0.000643325
Vnn3	vanin 3 [Source:MGI Symbol;Acc:MGI:1347055]	3.48005	1.79911	0.00924095
Myocd	myocardin [Source:MGI Symbol;Acc:MGI:2137495]	3.47976	1.79899	0.0107559
Angptl4	angiopoietin-like 4 [Source:MGI Symbol;Acc:MGI:1888999]	3.46842	1.79428	5.68674e-06
2310040G07Rik	RIKEN cDNA 2310040G07 gene [Source:MGI Symbol;Acc:MGI:1917534]	3.46514	1.79291	0.0236494
Irak2	interleukin-1 receptor-associated kinase 2 [Source:MGI Symbol;Acc:MGI:2429603]	3.46119	1.79127	8.39646e-13
Gda	guanine deaminase [Source:MGI Symbol;Acc:MGI:95678]	3.45521	1.78877	0.00244472
Retn	resistin [Source:MGI Symbol;Acc:MGI:1888506]	3.44457	1.78433	0.00456173
Tomt	transmembrane O-methyltransferase [Source:MGI Symbol;Acc:MGI:3769724]	3.44305	1.78369	0.0344949
Slc7a8	solute carrier family 7 (cationic amino acid transporter, y+ system), member 8 [Source:MGI Symbol;Acc:MGI:1355323]	3.43603	1.78074	1.02869e-10
Diras2	DIRAS family, GTP-binding RAS-like 2 [Source:MGI Symbol;Acc:MGI:1915453]	3.4286	1.77762	0.0137096
G0s2	G0/G1 switch gene 2 [Source:MGI Symbol;Acc:MGI:1316737]	3.42624	1.77663	0.00127882
Trp53inp2	transformation related protein 53 inducible nuclear protein 2 [Source:MGI Symbol;Acc:MGI:1915978]	3.42069	1.77429	1.16087e-05
Bcl6b	B cell CLL/lymphoma 6, member B [Source:MGI Symbol;Acc:MGI:1278332]	3.41804	1.77317	0.000374196
Naip2	NLR family, apoptosis inhibitory protein 2 [Source:MGI Symbol;Acc:MGI:1298226]	3.41279	1.77095	0.000461985
Prss23os	protease, serine 23, opposite strand [Source:MGI Symbol;Acc:MGI:1916654]	3.40644	1.76826	0.0218965
Olfm2	olfactomedin 2 [Source:MGI Symbol;Acc:MGI:3045350]	3.39667	1.76412	0.0377172
C920009B18Rik	RIKEN cDNA C920009B18 gene [Source:MGI Symbol;Acc:MGI:3583961]	3.39623	1.76393	0.0154126
Cysltr2	cysteinyl leukotriene receptor 2 [Source:MGI Symbol;Acc:MGI:1917336]	3.38714	1.76007	0.0415154
Rbm47	RNA binding motif protein 47 [Source:MGI Symbol;Acc:MGI:2384294]	3.35853	1.74783	9.5567e-07
Duoxa1	dual oxidase maturation factor 1 [Source:MGI Symbol;Acc:MGI:2384861]	3.34023	1.73995	6.01152e-05
Rbp7	retinol binding protein 7, cellular [Source:MGI Symbol;Acc:MGI:1890409]	3.33924	1.73952	0.012343
Ccdc69	coiled-coil domain containing 69 [Source:MGI Symbol;Acc:MGI:1196234]	3.33453	1.73748	0.00139417
Mfng	MFNG O-fucosylpeptide 3-beta-N-acetylglucosaminyltransferase [Source:MGI Symbol;Acc:MGI:1095404]	3.33347	1.73703	2.42661e-08
Amy1	amylase 1, salivary [Source:MGI Symbol;Acc:MGI:88019]	3.32859	1.73491	0.000294407
Bche	butyrylcholinesterase [Source:MGI Symbol;Acc:MGI:894278]	3.32693	1.73419	0.0140231
Tmc5	transmembrane channel-like gene family 5 [Source:MGI Symbol;Acc:MGI:1921674]	3.32186	1.73199	0.00203869
Slc40a1	solute carrier family 40 (iron-regulated transporter), member 1 [Source:MGI Symbol;Acc:MGI:1315204]	3.31761	1.73015	0.00346715
Ass1	argininosuccinate synthetase 1 [Source:MGI Symbol;Acc:MGI:88090]	3.31731	1.73002	2.60996e-06
Gm16537	predicted gene 16537 [Source:MGI Symbol;Acc:MGI:4414957]	3.31186	1.72764	0.0457348
Apob	apolipoprotein B [Source:MGI Symbol;Acc:MGI:88052]	3.31098	1.72726	0.0100513
Slc9a4	solute carrier family 9 (sodium/hydrogen exchanger), member 4 [Source:MGI Symbol;Acc:MGI:105074]	3.31057	1.72708	0.0352086
Srpx2	sushi-repeat-containing protein, X-linked 2 [Source:MGI Symbol;Acc:MGI:1916042]	3.30781	1.72588	0.000120428
Cdh9	cadherin 9 [Source:MGI Symbol;Acc:MGI:107433]	3.30171	1.72321	0.00736917
Cd200r4	CD200 receptor 4 [Source:MGI Symbol;Acc:MGI:3036289]	3.3006	1.72273	0.00352904
Strip2	striatin interacting protein 2 [Source:MGI Symbol;Acc:MGI:2444363]	3.29915	1.72209	0.000387684
Ptk2b	PTK2 protein tyrosine kinase 2 beta [Source:MGI Symbol;Acc:MGI:104908]	3.29912	1.72208	2.71102e-09
Sesn2	sestrin 2 [Source:MGI Symbol;Acc:MGI:2651874]	3.28993	1.71806	1.90639e-11
Ces1d	carboxylesterase 1D [Source:MGI Symbol;Acc:MGI:2148202]	3.2853	1.71603	0.0329603
Map4k1	mitogen-activated protein kinase kinase kinase kinase 1 [Source:MGI Symbol;Acc:MGI:1346882]	3.28259	1.71483	0.00274963
Steap4	STEAP family member 4 [Source:MGI Symbol;Acc:MGI:1923560]	3.27954	1.7135	0.000311518
Tmem273	transmembrane protein 273 [Source:MGI Symbol;Acc:MGI:1916319]	3.27896	1.71324	0.000226303
Ppp2r1b	protein phosphatase 2, regulatory subunit A, beta [Source:MGI Symbol;Acc:MGI:1920949]	3.27163	1.71001	6.24115e-05
Gm10521	predicted gene 10521 [Source:MGI Symbol;Acc:MGI:3642358]	3.26959	1.70911	0.030063
Tmem72	transmembrane protein 72 [Source:MGI Symbol;Acc:MGI:2442707]	3.26879	1.70876	0.0248069
Lilr4b	leukocyte immunoglobulin-like receptor, subfamily B, member 4B [Source:MGI Symbol;Acc:MGI:102702]	3.26376	1.70654	0.00161558
1110018N20Rik	RIKEN cDNA 1110018N20 gene [Source:MGI Symbol;Acc:MGI:1915753]	3.26266	1.70605	0.00152517
Klrk1	killer cell lectin-like receptor subfamily K, member 1 [Source:MGI Symbol;Acc:MGI:1196250]	3.26056	1.70512	0.0424304
NA	NA	3.26037	1.70504	0.00280307
Vwa7	von Willebrand factor A domain containing 7 [Source:MGI Symbol;Acc:MGI:1306798]	3.25641	1.70328	0.0138016
Abcc3	ATP-binding cassette, sub-family C (CFTR/MRP), member 3 [Source:MGI Symbol;Acc:MGI:1923658]	3.25169	1.70119	6.511e-10
Adcy5	adenylate cyclase 5 [Source:MGI Symbol;Acc:MGI:99673]	3.25154	1.70112	2.90798e-05
Ccl5	chemokine (C-C motif) ligand 5 [Source:MGI Symbol;Acc:MGI:98262]	3.24949	1.70021	0.0302337
Rtn4rl1	reticulon 4 receptor-like 1 [Source:MGI Symbol;Acc:MGI:2661375]	3.24756	1.69936	2.80373e-06
Cdca7l	cell division cycle associated 7 like [Source:MGI Symbol;Acc:MGI:2384982]	3.23573	1.69409	0.000860722
Hspb8	heat shock protein 8 [Source:MGI Symbol;Acc:MGI:2135756]	3.23386	1.69326	0.00181766
C130012C08Rik	RIKEN cDNA C130012C08 gene [Source:MGI Symbol;Acc:MGI:2145684]	3.21879	1.68652	0.0110369
Lamb3	laminin, beta 3 [Source:MGI Symbol;Acc:MGI:99915]	3.20812	1.68173	0.00138098
NA	NA	3.20547	1.68053	0.000419659
Ptger2	prostaglandin E receptor 2 (subtype EP2) [Source:MGI Symbol;Acc:MGI:97794]	3.20455	1.68012	0.00731899
Cd300a	CD300A molecule [Source:MGI Symbol;Acc:MGI:2443411]	3.20278	1.67933	0.000456776
Adhfe1	alcohol dehydrogenase, iron containing, 1 [Source:MGI Symbol;Acc:MGI:1923437]	3.18423	1.67094	0.00896333
Fmn1	formin 1 [Source:MGI Symbol;Acc:MGI:101815]	3.18247	1.67015	2.13914e-06
Slc24a3	solute carrier family 24 (sodium/potassium/calcium exchanger), member 3 [Source:MGI Symbol;Acc:MGI:2137513]	3.18013	1.66908	1.92552e-05
Tmem108	transmembrane protein 108 [Source:MGI Symbol;Acc:MGI:1932411]	3.1798	1.66893	0.040709
Arhgap36	Rho GTPase activating protein 36 [Source:MGI Symbol;Acc:MGI:1922654]	3.17752	1.6679	0.032525
F2r	coagulation factor II (thrombin) receptor [Source:MGI Symbol;Acc:MGI:101802]	3.16725	1.66323	0.00373279
9930014A18Rik	RIKEN cDNA 9930014A18 gene [Source:MGI Symbol;Acc:MGI:2444091]	3.16349	1.66152	0.000120428
Gm4876	predicted gene 4876 [Source:MGI Symbol;Acc:MGI:3647654]	3.16157	1.66064	0.00378879
Cenpw	centromere protein W [Source:MGI Symbol;Acc:MGI:1913561]	3.16117	1.66046	0.00253315
Ptprd	protein tyrosine phosphatase, receptor type, D [Source:MGI Symbol;Acc:MGI:97812]	3.15925	1.65958	0.000212432
Gstz1	glutathione transferase zeta 1 (maleylacetoacetate isomerase) [Source:MGI Symbol;Acc:MGI:1341859]	3.15782	1.65893	0.00414761
Gipc2	GIPC PDZ domain containing family, member 2 [Source:MGI Symbol;Acc:MGI:1889209]	3.15093	1.65578	0.000415509
Prg4	proteoglycan 4 (megakaryocyte stimulating factor, articular superficial zone protein) [Source:MGI Symbol;Acc:MGI:1891344]	3.14937	1.65506	0.0210591
Ccdc80	coiled-coil domain containing 80 [Source:MGI Symbol;Acc:MGI:1915146]	3.14923	1.655	0.000204009
Hk2	hexokinase 2 [Source:MGI Symbol;Acc:MGI:1315197]	3.13984	1.65069	5.88952e-06
P2rx6	purinergic receptor P2X, ligand-gated ion channel, 6 [Source:MGI Symbol;Acc:MGI:1337113]	3.13414	1.64807	0.0107951
Trdc	T cell receptor delta, constant region [Source:MGI Symbol;Acc:MGI:98612]	3.13233	1.64723	0.044182
Ppp1r3d	protein phosphatase 1, regulatory subunit 3D [Source:MGI Symbol;Acc:MGI:1917664]	3.12488	1.6438	3.26114e-07
Cd209f	CD209f antigen [Source:MGI Symbol;Acc:MGI:1916392]	3.11876	1.64097	0.00421026
Gm26671	predicted gene, 26671 [Source:MGI Symbol;Acc:MGI:5477165]	3.11418	1.63885	0.0402323
Ppp1r3c	protein phosphatase 1, regulatory subunit 3C [Source:MGI Symbol;Acc:MGI:1858229]	3.11167	1.63769	0.0177013
Stac2	SH3 and cysteine rich domain 2 [Source:MGI Symbol;Acc:MGI:2144518]	3.1091	1.6365	0.00105246
Tnfaip2	tumor necrosis factor, alpha-induced protein 2 [Source:MGI Symbol;Acc:MGI:104960]	3.10736	1.63569	4.29576e-06
Folh1	folate hydrolase 1 [Source:MGI Symbol;Acc:MGI:1858193]	3.10708	1.63556	0.0452021
Cdo1	cysteine dioxygenase 1, cytosolic [Source:MGI Symbol;Acc:MGI:105925]	3.10703	1.63554	0.0307847
Enpep	glutamyl aminopeptidase [Source:MGI Symbol;Acc:MGI:106645]	3.1056	1.63487	0.00096066
Six1	sine oculis-related homeobox 1 [Source:MGI Symbol;Acc:MGI:102780]	3.10544	1.6348	0.000795024
Mmp3	matrix metallopeptidase 3 [Source:MGI Symbol;Acc:MGI:97010]	3.10106	1.63276	0.0156791
Vdr	vitamin D (1,25-dihydroxyvitamin D3) receptor [Source:MGI Symbol;Acc:MGI:103076]	3.09922	1.6319	0.00220623
Rab27b	RAB27B, member RAS oncogene family [Source:MGI Symbol;Acc:MGI:1931295]	3.08467	1.62511	0.0173506
Cd209a	CD209a antigen [Source:MGI Symbol;Acc:MGI:2157942]	3.08311	1.62438	0.00199941
Rflnb	refilin B [Source:MGI Symbol;Acc:MGI:1923816]	3.07937	1.62264	0.000291869
Sctr	secretin receptor [Source:MGI Symbol;Acc:MGI:2441720]	3.07936	1.62263	0.0131734
Poln	DNA polymerase N [Source:MGI Symbol;Acc:MGI:2675617]	3.07901	1.62247	0.023878
Pde1b	phosphodiesterase 1B, Ca2+-calmodulin dependent [Source:MGI Symbol;Acc:MGI:97523]	3.07827	1.62212	2.02874e-07
Slc35g1	solute carrier family 35, member G1 [Source:MGI Symbol;Acc:MGI:2444789]	3.07391	1.62008	0.000102961
Ifi205	interferon activated gene 205 [Source:MGI Symbol;Acc:MGI:101847]	3.07347	1.61987	0.0282574
Prlr	prolactin receptor [Source:MGI Symbol;Acc:MGI:97763]	3.07089	1.61865	0.0263675
Map3k7cl	Map3k7 C-terminal like [Source:MGI Symbol;Acc:MGI:2446584]	3.06862	1.61759	1.76346e-05
Mrc2	mannose receptor, C type 2 [Source:MGI Symbol;Acc:MGI:107818]	3.06312	1.615	1.18432e-07
Popdc2	popeye domain containing 2 [Source:MGI Symbol;Acc:MGI:1930150]	3.05859	1.61287	0.0331008
Abca1	ATP-binding cassette, sub-family A (ABC1), member 1 [Source:MGI Symbol;Acc:MGI:99607]	3.05812	1.61265	6.8697e-09
Xdh	xanthine dehydrogenase [Source:MGI Symbol;Acc:MGI:98973]	3.05616	1.61172	4.00068e-07
Cd274	CD274 antigen [Source:MGI Symbol;Acc:MGI:1926446]	3.05323	1.61034	0.00164608
Serpina3n	serine (or cysteine) peptidase inhibitor, clade A, member 3N [Source:MGI Symbol;Acc:MGI:105045]	3.05162	1.60958	0.00413858
Gpat3	glycerol-3-phosphate acyltransferase 3 [Source:MGI Symbol;Acc:MGI:3603816]	3.05019	1.6089	0.00378879
Gpr68	G protein-coupled receptor 68 [Source:MGI Symbol;Acc:MGI:2441763]	3.04473	1.60631	0.00280022
Tfpi2	tissue factor pathway inhibitor 2 [Source:MGI Symbol;Acc:MGI:108543]	3.04215	1.60509	0.00377633
Clic5	chloride intracellular channel 5 [Source:MGI Symbol;Acc:MGI:1917912]	3.03953	1.60385	0.00124002
Tdrp	testis development related protein [Source:MGI Symbol;Acc:MGI:1919398]	3.03886	1.60353	0.000364604
Htatip2	HIV-1 Tat interactive protein 2 [Source:MGI Symbol;Acc:MGI:1859271]	3.03571	1.60203	5.65135e-06
Cd163l1	CD163 molecule-like 1 [Source:MGI Symbol;Acc:MGI:2443796]	3.02987	1.59925	0.0171533
Mogat1	monoacylglycerol O-acyltransferase 1 [Source:MGI Symbol;Acc:MGI:1915643]	3.02807	1.5984	0.0478744
Zfp423	zinc finger protein 423 [Source:MGI Symbol;Acc:MGI:1891217]	3.01857	1.59387	2.72846e-07
Sox7	SRY (sex determining region Y)-box 7 [Source:MGI Symbol;Acc:MGI:98369]	3.01542	1.59236	4.03412e-06
Slc4a7	solute carrier family 4, sodium bicarbonate cotransporter, member 7 [Source:MGI Symbol;Acc:MGI:2443878]	3.0117	1.59058	0.000123244
Dpep2	dipeptidase 2 [Source:MGI Symbol;Acc:MGI:2442042]	3.00957	1.58956	0.023878
Sh2d1b1	SH2 domain containing 1B1 [Source:MGI Symbol;Acc:MGI:1349420]	3.00695	1.5883	0.0403532
Ulbp1	UL16 binding protein 1 [Source:MGI Symbol;Acc:MGI:1925027]	3.00193	1.58589	0.0032513
Kcnb1	potassium voltage gated channel, Shab-related subfamily, member 1 [Source:MGI Symbol;Acc:MGI:96666]	2.9995	1.58472	2.23289e-05
Gm14964	predicted gene 14964 [Source:MGI Symbol;Acc:MGI:3641621]	2.99698	1.58351	0.0358476
Hist1h4h	histone cluster 1, H4h [Source:MGI Symbol;Acc:MGI:2448427]	2.99477	1.58244	0.00592466
Ano9	anoctamin 9 [Source:MGI Symbol;Acc:MGI:1918595]	2.99434	1.58224	0.00601157
Mrpl48-ps	mitochondrial ribosomal protein L48 pseudogene [Source:MGI Symbol;Acc:MGI:3050089]	2.99267	1.58143	0.0488594
Col6a4	collagen, type VI, alpha 4 [Source:MGI Symbol;Acc:MGI:1915803]	2.98437	1.57743	0.00530153
Aifm2	apoptosis-inducing factor, mitochondrion-associated 2 [Source:MGI Symbol;Acc:MGI:1918611]	2.98222	1.57639	4.03311e-05
Aplnr	apelin receptor [Source:MGI Symbol;Acc:MGI:1346086]	2.98105	1.57582	0.00574201
Tnnt1	troponin T1, skeletal, slow [Source:MGI Symbol;Acc:MGI:1333868]	2.97402	1.57242	0.0014196
Ptprk	protein tyrosine phosphatase, receptor type, K [Source:MGI Symbol;Acc:MGI:103310]	2.97266	1.57176	1.41627e-05
Bcl2a1b	B cell leukemia/lymphoma 2 related protein A1b [Source:MGI Symbol;Acc:MGI:1278326]	2.97064	1.57078	0.00425413
Ntf3	neurotrophin 3 [Source:MGI Symbol;Acc:MGI:97380]	2.96075	1.56596	0.012343
Vegfa	vascular endothelial growth factor A [Source:MGI Symbol;Acc:MGI:103178]	2.94996	1.56069	2.84027e-07
Slamf7	SLAM family member 7 [Source:MGI Symbol;Acc:MGI:1922595]	2.94846	1.55996	0.0144748
Papln	papilin, proteoglycan-like sulfated glycoprotein [Source:MGI Symbol;Acc:MGI:2386139]	2.93791	1.55479	0.0272741
Lgals3bp	lectin, galactoside-binding, soluble, 3 binding protein [Source:MGI Symbol;Acc:MGI:99554]	2.93613	1.55391	6.92801e-05
Tlr8	toll-like receptor 8 [Source:MGI Symbol;Acc:MGI:2176887]	2.93486	1.55329	0.00704388
Slc30a2	solute carrier family 30 (zinc transporter), member 2 [Source:MGI Symbol;Acc:MGI:106637]	2.92882	1.55032	0.00386974
4930486L24Rik	RIKEN cDNA 4930486L24 gene [Source:MGI Symbol;Acc:MGI:1922258]	2.92836	1.55009	0.00153041
Ano3	anoctamin 3 [Source:MGI Symbol;Acc:MGI:3613666]	2.92622	1.54904	0.00658273
Kif21b	kinesin family member 21B [Source:MGI Symbol;Acc:MGI:109234]	2.92406	1.54798	0.000147127
Dipk1a	divergent protein kinase domain 1A [Source:MGI Symbol;Acc:MGI:1914516]	2.91535	1.54367	0.00245282
Lzts1	leucine zipper, putative tumor suppressor 1 [Source:MGI Symbol;Acc:MGI:2684762]	2.91414	1.54307	0.00202336
Selp	selectin, platelet [Source:MGI Symbol;Acc:MGI:98280]	2.91232	1.54217	2.92467e-10
Slc26a10	solute carrier family 26, member 10 [Source:MGI Symbol;Acc:MGI:2143920]	2.90802	1.54004	0.0260077
Gm15441	predicted gene 15441 [Source:MGI Symbol;Acc:MGI:3641753]	2.90344	1.53776	0.00151285
Ablim3	actin binding LIM protein family, member 3 [Source:MGI Symbol;Acc:MGI:2442582]	2.9012	1.53665	0.00169068
Pcdh20	protocadherin 20 [Source:MGI Symbol;Acc:MGI:2443376]	2.90017	1.53614	0.00897683
Ugt1a7c	UDP glucuronosyltransferase 1 family, polypeptide A7C [Source:MGI Symbol;Acc:MGI:3032636]	2.89204	1.53209	0.000399654
Ccl6	chemokine (C-C motif) ligand 6 [Source:MGI Symbol;Acc:MGI:98263]	2.89164	1.53189	0.00604071
Fam217b	family with sequence similarity 217, member B [Source:MGI Symbol;Acc:MGI:1918782]	2.88811	1.53013	6.8697e-09
Rnasel	ribonuclease L (2', 5'-oligoisoadenylate synthetase-dependent) [Source:MGI Symbol;Acc:MGI:1098272]	2.87877	1.52545	9.21472e-06
Unc5a	unc-5 netrin receptor A [Source:MGI Symbol;Acc:MGI:894682]	2.87635	1.52424	0.0189069
Rnd1	Rho family GTPase 1 [Source:MGI Symbol;Acc:MGI:2444878]	2.8742	1.52316	0.00116442
Slc9b2	solute carrier family 9, subfamily B (NHA2, cation proton antiporter 2), member 2 [Source:MGI Symbol;Acc:MGI:2140077]	2.86901	1.52055	2.49773e-05
Ptpn22	protein tyrosine phosphatase, non-receptor type 22 (lymphoid) [Source:MGI Symbol;Acc:MGI:107170]	2.86582	1.51895	0.0241202
Mrap	melanocortin 2 receptor accessory protein [Source:MGI Symbol;Acc:MGI:1924287]	2.86055	1.51629	0.0313019
Dock2	dedicator of cyto-kinesis 2 [Source:MGI Symbol;Acc:MGI:2149010]	2.85395	1.51296	0.00643188
Kcnc2	potassium voltage gated channel, Shaw-related subfamily, member 2 [Source:MGI Symbol;Acc:MGI:96668]	2.85103	1.51148	0.0485347
Gm10451	predicted gene 10451 [Source:MGI Symbol;Acc:MGI:3641898]	2.84604	1.50896	0.0264883
Carmn	cardiac mesoderm enhancer-associated non-coding RNA [Source:MGI Symbol;Acc:MGI:4439832]	2.84127	1.50654	0.00030709
Slc25a25	solute carrier family 25 (mitochondrial carrier, phosphate carrier), member 25 [Source:MGI Symbol;Acc:MGI:1915913]	2.83724	1.50449	5.95786e-08
Pla2g2d	phospholipase A2, group IID [Source:MGI Symbol;Acc:MGI:1341796]	2.8346	1.50315	0.0112536
Gm17745	predicted gene, 17745 [Source:MGI Symbol;Acc:MGI:5009823]	2.83384	1.50276	0.0409345
Mst1r	macrophage stimulating 1 receptor (c-met-related tyrosine kinase) [Source:MGI Symbol;Acc:MGI:99614]	2.83149	1.50156	1.47202e-07
Fam217a	family with sequence similarity 217, member A [Source:MGI Symbol;Acc:MGI:1919114]	2.82492	1.49821	0.0111544
Gm29100	predicted gene 29100 [Source:MGI Symbol;Acc:MGI:5579806]	2.81898	1.49518	0.0270859
Gpt	glutamic pyruvic transaminase, soluble [Source:MGI Symbol;Acc:MGI:95802]	2.81669	1.494	0.0338116
Gm14418	predicted gene 14418 [Source:MGI Symbol;Acc:MGI:3702408]	2.80763	1.48935	0.00608563
Gm15972	predicted gene 15972 [Source:MGI Symbol;Acc:MGI:3801965]	2.80696	1.48901	0.0397139
Car8	carbonic anhydrase 8 [Source:MGI Symbol;Acc:MGI:88253]	2.80157	1.48624	0.0360986
Rassf9	Ras association (RalGDS/AF-6) domain family (N-terminal) member 9 [Source:MGI Symbol;Acc:MGI:2384307]	2.79864	1.48473	0.00239825
Ccdc85a	coiled-coil domain containing 85A [Source:MGI Symbol;Acc:MGI:2445069]	2.79805	1.48442	0.0196298
Cmklr1	chemokine-like receptor 1 [Source:MGI Symbol;Acc:MGI:109603]	2.79773	1.48426	3.40784e-09
Itgb2	integrin beta 2 [Source:MGI Symbol;Acc:MGI:96611]	2.79674	1.48375	0.0165933
Clstn3	calsyntenin 3 [Source:MGI Symbol;Acc:MGI:2178323]	2.79663	1.48369	0.0022899
Smad6	SMAD family member 6 [Source:MGI Symbol;Acc:MGI:1336883]	2.79151	1.48104	0.0213114
Itgal	integrin alpha L [Source:MGI Symbol;Acc:MGI:96606]	2.79079	1.48068	0.0463267
Gpr1	G protein-coupled receptor 1 [Source:MGI Symbol;Acc:MGI:2385324]	2.78879	1.47964	0.039508
Ccbe1	collagen and calcium binding EGF domains 1 [Source:MGI Symbol;Acc:MGI:2445053]	2.78305	1.47666	0.000396829
Spef2	sperm flagellar 2 [Source:MGI Symbol;Acc:MGI:2443727]	2.78232	1.47629	0.00214693
Shh	sonic hedgehog [Source:MGI Symbol;Acc:MGI:98297]	2.78205	1.47615	0.00178692
Rab37	RAB37, member RAS oncogene family [Source:MGI Symbol;Acc:MGI:1929945]	2.78149	1.47586	0.000505226
Kif27	kinesin family member 27 [Source:MGI Symbol;Acc:MGI:1922300]	2.77925	1.4747	0.0183775
Glyctk	glycerate kinase [Source:MGI Symbol;Acc:MGI:2444085]	2.77385	1.47189	0.023497
Arntl	aryl hydrocarbon receptor nuclear translocator-like [Source:MGI Symbol;Acc:MGI:1096381]	2.77289	1.47139	0.00059419
Mcam	melanoma cell adhesion molecule [Source:MGI Symbol;Acc:MGI:1933966]	2.77181	1.47083	1.17977e-08
Mgmt	O-6-methylguanine-DNA methyltransferase [Source:MGI Symbol;Acc:MGI:96977]	2.77092	1.47037	0.000839258
Abcc9	ATP-binding cassette, sub-family C (CFTR/MRP), member 9 [Source:MGI Symbol;Acc:MGI:1352630]	2.75698	1.46309	4.13665e-05
Dcst2	DC-STAMP domain containing 2 [Source:MGI Symbol;Acc:MGI:2685606]	2.75615	1.46265	0.0115928
Mctp2	multiple C2 domains, transmembrane 2 [Source:MGI Symbol;Acc:MGI:2685335]	2.75429	1.46168	0.0407757
Pm20d2	peptidase M20 domain containing 2 [Source:MGI Symbol;Acc:MGI:2685270]	2.75418	1.46162	0.0413717
Cd180	CD180 antigen [Source:MGI Symbol;Acc:MGI:1194924]	2.74777	1.45826	0.0113394
Ly75	lymphocyte antigen 75 [Source:MGI Symbol;Acc:MGI:106662]	2.74699	1.45785	0.0173191
Inpp5j	inositol polyphosphate 5-phosphatase J [Source:MGI Symbol;Acc:MGI:2158663]	2.74571	1.45718	0.0205843
Mmp9	matrix metallopeptidase 9 [Source:MGI Symbol;Acc:MGI:97011]	2.74521	1.45692	0.000831405
Rasl11a	RAS-like, family 11, member A [Source:MGI Symbol;Acc:MGI:1916145]	2.74197	1.45521	7.91715e-05
C1rl	complement component 1, r subcomponent-like [Source:MGI Symbol;Acc:MGI:2660692]	2.74195	1.4552	9.78458e-05
Gm45053	predicted gene 45053 [Source:MGI Symbol;Acc:MGI:5753629]	2.73082	1.44933	0.0180971
Arhgap25	Rho GTPase activating protein 25 [Source:MGI Symbol;Acc:MGI:2443687]	2.72985	1.44882	0.0153558
Trf	transferrin [Source:MGI Symbol;Acc:MGI:98821]	2.72578	1.44667	3.22786e-08
Adap2	ArfGAP with dual PH domains 2 [Source:MGI Symbol;Acc:MGI:2663075]	2.72316	1.44528	1.41161e-05
Anpep	alanyl (membrane) aminopeptidase [Source:MGI Symbol;Acc:MGI:5000466]	2.71946	1.44332	0.000149132
Clstn2	calsyntenin 2 [Source:MGI Symbol;Acc:MGI:1929897]	2.71753	1.44229	0.000259786
Trps1	transcriptional repressor GATA binding 1 [Source:MGI Symbol;Acc:MGI:1927616]	2.71525	1.44108	0.000206783
Gm6277	predicted gene 6277 [Source:MGI Symbol;Acc:MGI:3779583]	2.71479	1.44084	0.0070753
Map7d3	MAP7 domain containing 3 [Source:MGI Symbol;Acc:MGI:2445051]	2.70813	1.4373	0.00202042
Ormdl3	ORM1-like 3 (S. cerevisiae) [Source:MGI Symbol;Acc:MGI:1913862]	2.70691	1.43665	0.000195003
Mycbp2	MYC binding protein 2, E3 ubiquitin protein ligase [Source:MGI Symbol;Acc:MGI:2179432]	2.70101	1.4335	3.86501e-07
Cavin2	caveolae associated 2 [Source:MGI Symbol;Acc:MGI:99513]	2.69632	1.43099	0.00177958
Slc2a4	solute carrier family 2 (facilitated glucose transporter), member 4 [Source:MGI Symbol;Acc:MGI:95758]	2.6939	1.4297	0.0400087
Igf1	insulin-like growth factor 1 [Source:MGI Symbol;Acc:MGI:96432]	2.69028	1.42776	0.00115732
Rps6ka3	ribosomal protein S6 kinase polypeptide 3 [Source:MGI Symbol;Acc:MGI:104557]	2.68796	1.42651	8.92064e-05
Gm35315	predicted gene, 35315 [Source:MGI Symbol;Acc:MGI:5594474]	2.68745	1.42624	0.0226998
Vegfd	vascular endothelial growth factor D [Source:MGI Symbol;Acc:MGI:108037]	2.68702	1.42601	0.000233198
Slc15a3	solute carrier family 15, member 3 [Source:MGI Symbol;Acc:MGI:1929691]	2.68633	1.42564	0.00417138
Aox3	aldehyde oxidase 3 [Source:MGI Symbol;Acc:MGI:1918974]	2.68545	1.42516	0.0149587
Rasgrp1	RAS guanyl releasing protein 1 [Source:MGI Symbol;Acc:MGI:1314635]	2.6852	1.42503	0.0454398
Prkcz	protein kinase C, zeta [Source:MGI Symbol;Acc:MGI:97602]	2.68303	1.42386	0.000586952
Cxcl14	chemokine (C-X-C motif) ligand 14 [Source:MGI Symbol;Acc:MGI:1888514]	2.68161	1.4231	0.00137699
Gm28187	predicted gene 28187 [Source:MGI Symbol;Acc:MGI:5578893]	2.66985	1.41676	0.00922197
Ccl9	chemokine (C-C motif) ligand 9 [Source:MGI Symbol;Acc:MGI:104533]	2.66006	1.41146	0.0123393
Cnnm2	cyclin M2 [Source:MGI Symbol;Acc:MGI:2151054]	2.65763	1.41014	1.28202e-08
Wnt2b	wingless-type MMTV integration site family, member 2B [Source:MGI Symbol;Acc:MGI:1261834]	2.6556	1.40904	0.0376331
Sh2b2	SH2B adaptor protein 2 [Source:MGI Symbol;Acc:MGI:1345171]	2.65548	1.40897	5.07466e-06
Cyfip2	cytoplasmic FMR1 interacting protein 2 [Source:MGI Symbol;Acc:MGI:1924134]	2.64976	1.40586	0.00102908
Ctss	cathepsin S [Source:MGI Symbol;Acc:MGI:107341]	2.64776	1.40477	0.013671
Vipr1	vasoactive intestinal peptide receptor 1 [Source:MGI Symbol;Acc:MGI:109272]	2.63815	1.39953	0.01872
Afdn	afadin, adherens junction formation factor [Source:MGI Symbol;Acc:MGI:1314653]	2.63678	1.39878	9.8713e-07
Fam167a	family with sequence similarity 167, member A [Source:MGI Symbol;Acc:MGI:3606565]	2.63164	1.39596	0.00820525
Wipf3	WAS/WASL interacting protein family, member 3 [Source:MGI Symbol;Acc:MGI:3044681]	2.63133	1.39579	0.0228715
Fam174b	family with sequence similarity 174, member B [Source:MGI Symbol;Acc:MGI:3698178]	2.62962	1.39485	0.00467903
Coch	cochlin [Source:MGI Symbol;Acc:MGI:1278313]	2.62396	1.39174	0.00223555
Palld	palladin, cytoskeletal associated protein [Source:MGI Symbol;Acc:MGI:1919583]	2.62385	1.39169	5.66895e-07
Pmepa1	prostate transmembrane protein, androgen induced 1 [Source:MGI Symbol;Acc:MGI:1929600]	2.62181	1.39056	1.17977e-08
Cluh	clustered mitochondria (cluA/CLU1) homolog [Source:MGI Symbol;Acc:MGI:1921398]	2.62076	1.38999	3.34944e-13
Ifi27l2a	interferon, alpha-inducible protein 27 like 2A [Source:MGI Symbol;Acc:MGI:1924183]	2.61469	1.38664	0.0427076
Lcp2	lymphocyte cytosolic protein 2 [Source:MGI Symbol;Acc:MGI:1321402]	2.61076	1.38447	0.00684273
Dapk1	death associated protein kinase 1 [Source:MGI Symbol;Acc:MGI:1916885]	2.60973	1.3839	3.86501e-07
Ifitm10	interferon induced transmembrane protein 10 [Source:MGI Symbol;Acc:MGI:2444776]	2.60607	1.38188	0.00862247
Six4	sine oculis-related homeobox 4 [Source:MGI Symbol;Acc:MGI:106034]	2.60393	1.38069	0.00505065
Mrgprb2	MAS-related GPR, member B2 [Source:MGI Symbol;Acc:MGI:2441674]	2.6029	1.38012	0.0432014
Slc6a13	solute carrier family 6 (neurotransmitter transporter, GABA), member 13 [Source:MGI Symbol;Acc:MGI:95629]	2.60179	1.3795	0.0056024
Cep55	centrosomal protein 55 [Source:MGI Symbol;Acc:MGI:1921357]	2.5962	1.3764	0.0148542
Ptprg	protein tyrosine phosphatase, receptor type, G [Source:MGI Symbol;Acc:MGI:97814]	2.59006	1.37298	9.15024e-17
Lgals3	lectin, galactose binding, soluble 3 [Source:MGI Symbol;Acc:MGI:96778]	2.58948	1.37266	0.00133041
Slit3	slit guidance ligand 3 [Source:MGI Symbol;Acc:MGI:1315202]	2.58879	1.37228	0.00349702
Gcsam	germinal center associated, signaling and motility [Source:MGI Symbol;Acc:MGI:102969]	2.58871	1.37223	0.0219857
Bmper	BMP-binding endothelial regulator [Source:MGI Symbol;Acc:MGI:1920480]	2.5881	1.3719	0.0220315
H2-Q5	histocompatibility 2, Q region locus 5 [Source:MGI Symbol;Acc:MGI:95934]	2.58775	1.3717	0.0165385
Nlrc5	NLR family, CARD domain containing 5 [Source:MGI Symbol;Acc:MGI:3612191]	2.58772	1.37168	1.47107e-05
Aqp1	aquaporin 1 [Source:MGI Symbol;Acc:MGI:103201]	2.58679	1.37116	0.00659952
Prkar2b	protein kinase, cAMP dependent regulatory, type II beta [Source:MGI Symbol;Acc:MGI:97760]	2.58607	1.37076	0.00956997
Ahsg	alpha-2-HS-glycoprotein [Source:MGI Symbol;Acc:MGI:107189]	2.5851	1.37022	0.0178043
Pxdn	peroxidasin [Source:MGI Symbol;Acc:MGI:1916925]	2.58204	1.36851	8.84481e-09
Enc1	ectodermal-neural cortex 1 [Source:MGI Symbol;Acc:MGI:109610]	2.57897	1.36679	4.52732e-06
Lag3	lymphocyte-activation gene 3 [Source:MGI Symbol;Acc:MGI:106588]	2.57626	1.36528	0.00688126
Klhl30	kelch-like 30 [Source:MGI Symbol;Acc:MGI:1918038]	2.57331	1.36363	0.00362986
Syn2	synapsin II [Source:MGI Symbol;Acc:MGI:103020]	2.56582	1.35942	0.0160861
Mef2c	myocyte enhancer factor 2C [Source:MGI Symbol;Acc:MGI:99458]	2.56536	1.35916	0.0236325
Gm7694	predicted gene 7694 [Source:MGI Symbol;Acc:MGI:3649135]	2.56516	1.35905	3.77405e-08
Pkd1l2	polycystic kidney disease 1 like 2 [Source:MGI Symbol;Acc:MGI:2664668]	2.5629	1.35778	0.0491445
Rgs7bp	regulator of G-protein signalling 7 binding protein [Source:MGI Symbol;Acc:MGI:106334]	2.56047	1.35641	0.0143016
Tlr5	toll-like receptor 5 [Source:MGI Symbol;Acc:MGI:1858171]	2.5603	1.35631	3.62834e-06
Mgll	monoglyceride lipase [Source:MGI Symbol;Acc:MGI:1346042]	2.55845	1.35527	0.00107713
Cdh5	cadherin 5 [Source:MGI Symbol;Acc:MGI:105057]	2.55584	1.3538	1.77839e-07
Wfdc17	WAP four-disulfide core domain 17 [Source:MGI Symbol;Acc:MGI:3649773]	2.55402	1.35277	0.0165385
Gprc5c	G protein-coupled receptor, family C, group 5, member C [Source:MGI Symbol;Acc:MGI:1917605]	2.55301	1.3522	0.000186251
Upb1	ureidopropionase, beta [Source:MGI Symbol;Acc:MGI:2143535]	2.55227	1.35178	0.0174238
C9orf72	C9orf72, member of C9orf72-SMCR8 complex [Source:MGI Symbol;Acc:MGI:1920455]	2.55175	1.35149	0.000724167
Mrgprx2	MAS-related GPR, member X2 [Source:MGI Symbol;Acc:MGI:3588270]	2.55173	1.35147	0.0347737
Wnt5a	wingless-type MMTV integration site family, member 5A [Source:MGI Symbol;Acc:MGI:98958]	2.54628	1.34839	9.10973e-06
Gulo	gulonolactone (L-) oxidase [Source:MGI Symbol;Acc:MGI:1353434]	2.54479	1.34755	0.0481411
Unc5c	unc-5 netrin receptor C [Source:MGI Symbol;Acc:MGI:1095412]	2.54197	1.34594	0.00234449
Cxxc4	CXXC finger 4 [Source:MGI Symbol;Acc:MGI:2442112]	2.5373	1.3433	0.00799532
Gm14412	predicted gene 14412 [Source:MGI Symbol;Acc:MGI:3652251]	2.53502	1.342	0.00185508
Ptgdr	prostaglandin D receptor [Source:MGI Symbol;Acc:MGI:102966]	2.53273	1.34069	0.0236575
Lratd2	LRAT domain containing 1 [Source:MGI Symbol;Acc:MGI:3026924]	2.53156	1.34002	3.2861e-05
AI427809	expressed sequence AI427809 [Source:MGI Symbol;Acc:MGI:2140270]	2.52885	1.33848	0.00238898
4930539E08Rik	RIKEN cDNA 4930539E08 gene [Source:MGI Symbol;Acc:MGI:1925441]	2.52883	1.33847	0.0289462
Htra3	HtrA serine peptidase 3 [Source:MGI Symbol;Acc:MGI:1925808]	2.52388	1.33565	8.95907e-05
Tmem120a	transmembrane protein 120A [Source:MGI Symbol;Acc:MGI:2686991]	2.52208	1.33462	3.36612e-05
Mpeg1	macrophage expressed gene 1 [Source:MGI Symbol;Acc:MGI:1333743]	2.51773	1.33212	0.00648173
Pnpla2	patatin-like phospholipase domain containing 2 [Source:MGI Symbol;Acc:MGI:1914103]	2.51616	1.33123	0.000622048
Ampd3	adenosine monophosphate deaminase 3 [Source:MGI Symbol;Acc:MGI:1096344]	2.51589	1.33107	3.63878e-12
Gys1	glycogen synthase 1, muscle [Source:MGI Symbol;Acc:MGI:101805]	2.51259	1.32917	0.00132013
Glis3	GLIS family zinc finger 3 [Source:MGI Symbol;Acc:MGI:2444289]	2.51056	1.32801	0.00623151
Epha1	Eph receptor A1 [Source:MGI Symbol;Acc:MGI:107381]	2.5105	1.32798	0.0378538
Cd300ld	CD300 molecule like family member d [Source:MGI Symbol;Acc:MGI:2442358]	2.50874	1.32696	0.00295287
Map3k9	mitogen-activated protein kinase kinase kinase 9 [Source:MGI Symbol;Acc:MGI:2449952]	2.50795	1.32651	0.0273488
Rufy4	RUN and FYVE domain containing 4 [Source:MGI Symbol;Acc:MGI:3588214]	2.50582	1.32529	0.0112606
Zfpm2	zinc finger protein, multitype 2 [Source:MGI Symbol;Acc:MGI:1334444]	2.50575	1.32524	0.00923806
Trp53i11	transformation related protein 53 inducible protein 11 [Source:MGI Symbol;Acc:MGI:2670995]	2.50521	1.32493	0.00012109
Cd302	CD302 antigen [Source:MGI Symbol;Acc:MGI:1913455]	2.50516	1.3249	0.00086539
Ar	androgen receptor [Source:MGI Symbol;Acc:MGI:88064]	2.50361	1.32401	9.59621e-05
Sorl1	sortilin-related receptor, LDLR class A repeats-containing [Source:MGI Symbol;Acc:MGI:1202296]	2.50349	1.32394	4.98846e-05
Gm12655	predicted gene 12655 [Source:MGI Symbol;Acc:MGI:3651648]	2.50134	1.3227	0.00688652
Mafb	v-maf musculoaponeurotic fibrosarcoma oncogene family, protein B (avian) [Source:MGI Symbol;Acc:MGI:104555]	2.50065	1.3223	4.3959e-06
Apba2	amyloid beta (A4) precursor protein-binding, family A, member 2 [Source:MGI Symbol;Acc:MGI:1261791]	2.49099	1.31672	0.00942424
Epsti1	epithelial stromal interaction 1 (breast) [Source:MGI Symbol;Acc:MGI:1915168]	2.48658	1.31416	0.0275021
Adcy3	adenylate cyclase 3 [Source:MGI Symbol;Acc:MGI:99675]	2.48484	1.31316	2.43393e-05
Pde4d	phosphodiesterase 4D, cAMP specific [Source:MGI Symbol;Acc:MGI:99555]	2.48404	1.31269	0.000702398
Ms4a2	membrane-spanning 4-domains, subfamily A, member 2 [Source:MGI Symbol;Acc:MGI:95495]	2.48195	1.31147	0.0445293
Tpsab1	tryptase alpha/beta 1 [Source:MGI Symbol;Acc:MGI:96943]	2.47913	1.30983	0.0377148
Krt80	keratin 80 [Source:MGI Symbol;Acc:MGI:1921377]	2.47904	1.30978	0.0011511
Rnf150	ring finger protein 150 [Source:MGI Symbol;Acc:MGI:2443860]	2.47879	1.30963	0.000171726
Nrp1	neuropilin 1 [Source:MGI Symbol;Acc:MGI:106206]	2.47857	1.30951	0.000113788
Twist1	twist basic helix-loop-helix transcription factor 1 [Source:MGI Symbol;Acc:MGI:98872]	2.47675	1.30845	5.69343e-06
Irf8	interferon regulatory factor 8 [Source:MGI Symbol;Acc:MGI:96395]	2.47413	1.30692	0.0069682
Mylk	myosin, light polypeptide kinase [Source:MGI Symbol;Acc:MGI:894806]	2.47346	1.30653	0.000202853
Fblim1	filamin binding LIM protein 1 [Source:MGI Symbol;Acc:MGI:1921452]	2.47339	1.30649	3.69688e-09
Ptprc	protein tyrosine phosphatase, receptor type, C [Source:MGI Symbol;Acc:MGI:97810]	2.47319	1.30637	0.0463571
Eva1a	eva-1 homolog A (C. elegans) [Source:MGI Symbol;Acc:MGI:2385247]	2.46985	1.30442	0.0386468
Mcpt4	mast cell protease 4 [Source:MGI Symbol;Acc:MGI:96940]	2.46833	1.30354	0.0462933
Kctd12b	potassium channel tetramerisation domain containing 12b [Source:MGI Symbol;Acc:MGI:2444667]	2.46135	1.29945	0.00480781
Thbs1	thrombospondin 1 [Source:MGI Symbol;Acc:MGI:98737]	2.45822	1.29761	0.00570514
Gm20257	predicted gene, 20257 [Source:MGI Symbol;Acc:MGI:5012442]	2.45588	1.29624	0.0114676
Pirb	paired Ig-like receptor B [Source:MGI Symbol;Acc:MGI:894311]	2.44921	1.29231	0.0162407
Grk3	G protein-coupled receptor kinase 3 [Source:MGI Symbol;Acc:MGI:87941]	2.44828	1.29177	0.000498143
Clec10a	C-type lectin domain family 10, member A [Source:MGI Symbol;Acc:MGI:96975]	2.44795	1.29158	0.012421
9630013D21Rik	RIKEN cDNA 9630013D21 gene [Source:MGI Symbol;Acc:MGI:2442649]	2.44501	1.28984	0.0466532
Gm1840	predicted gene 1840 [Source:MGI Symbol;Acc:MGI:3037698]	2.443	1.28865	0.0139848
Slc37a2	solute carrier family 37 (glycerol-3-phosphate transporter), member 2 [Source:MGI Symbol;Acc:MGI:1929693]	2.44181	1.28795	0.00520446
Unc5b	unc-5 netrin receptor B [Source:MGI Symbol;Acc:MGI:894703]	2.44159	1.28782	0.00134291
C1qtnf1	C1q and tumor necrosis factor related protein 1 [Source:MGI Symbol;Acc:MGI:1919254]	2.43967	1.28669	3.05813e-05
Il17re	interleukin 17 receptor E [Source:MGI Symbol;Acc:MGI:1889371]	2.4382	1.28582	0.00390439
Nlrp1a	NLR family, pyrin domain containing 1A [Source:MGI Symbol;Acc:MGI:2684861]	2.43435	1.28354	0.0232867
Fgfrl1	fibroblast growth factor receptor-like 1 [Source:MGI Symbol;Acc:MGI:2150920]	2.43246	1.28242	0.000251717
Mn1	meningioma 1 [Source:MGI Symbol;Acc:MGI:1261813]	2.43045	1.28122	0.048042
Pakap	paralemmin A kinase anchor protein [Source:MGI Symbol;Acc:MGI:5141924]	2.42818	1.27987	0.00207567
Atp2a3	ATPase, Ca++ transporting, ubiquitous [Source:MGI Symbol;Acc:MGI:1194503]	2.42714	1.27926	1.90794e-07
Hpse	heparanase [Source:MGI Symbol;Acc:MGI:1343124]	2.42534	1.27819	0.0121339
D830024N08Rik	RIKEN cDNA D830024N08 gene [Source:MGI Symbol;Acc:MGI:2442966]	2.42388	1.27732	0.0369064
Hoxc8	homeobox C8 [Source:MGI Symbol;Acc:MGI:96198]	2.42137	1.27582	2.39158e-05
Acss3	acyl-CoA synthetase short-chain family member 3 [Source:MGI Symbol;Acc:MGI:2685720]	2.42001	1.27501	0.0134241
Mgst1	microsomal glutathione S-transferase 1 [Source:MGI Symbol;Acc:MGI:1913850]	2.4197	1.27483	0.0431549
Hsd11b1	hydroxysteroid 11-beta dehydrogenase 1 [Source:MGI Symbol;Acc:MGI:103562]	2.41933	1.2746	0.0115551
Acad11	acyl-Coenzyme A dehydrogenase family, member 11 [Source:MGI Symbol;Acc:MGI:2143169]	2.41793	1.27377	0.000139145
Gapt	Grb2-binding adaptor, transmembrane [Source:MGI Symbol;Acc:MGI:3608341]	2.4169	1.27316	0.0434122
Peg3	paternally expressed 3 [Source:MGI Symbol;Acc:MGI:104748]	2.41572	1.27246	8.87152e-06
Ldha	lactate dehydrogenase A [Source:MGI Symbol;Acc:MGI:96759]	2.41317	1.27093	0.0463267
Cd68	CD68 antigen [Source:MGI Symbol;Acc:MGI:88342]	2.41028	1.2692	0.00214788
Pcbd1	pterin 4 alpha carbinolamine dehydratase/dimerization cofactor of hepatocyte nuclear factor 1 alpha (TCF1) 1 [Source:MGI Symbol;Acc:MGI:94873]	2.40477	1.2659	0.0113562
H2-D1	histocompatibility 2, D region locus 1 [Source:MGI Symbol;Acc:MGI:95896]	2.40428	1.26561	7.2919e-05
Trim16	tripartite motif-containing 16 [Source:MGI Symbol;Acc:MGI:2137356]	2.40405	1.26547	9.9512e-06
Isoc1	isochorismatase domain containing 1 [Source:MGI Symbol;Acc:MGI:1913557]	2.39973	1.26287	9.5825e-05
Hpn	hepsin [Source:MGI Symbol;Acc:MGI:1196620]	2.39512	1.2601	0.00995024
Emp1	epithelial membrane protein 1 [Source:MGI Symbol;Acc:MGI:107941]	2.39453	1.25974	0.000200228
Mgst2	microsomal glutathione S-transferase 2 [Source:MGI Symbol;Acc:MGI:2448481]	2.38999	1.25701	0.0455319
Tmem106a	transmembrane protein 106A [Source:MGI Symbol;Acc:MGI:1922056]	2.38811	1.25587	5.52239e-05
Cd84	CD84 antigen [Source:MGI Symbol;Acc:MGI:1336885]	2.38752	1.25551	0.02993
Tes	testis derived transcript [Source:MGI Symbol;Acc:MGI:105081]	2.38745	1.25547	0.00223555
Maob	monoamine oxidase B [Source:MGI Symbol;Acc:MGI:96916]	2.38681	1.25508	0.00220623
Dach1	dachshund family transcription factor 1 [Source:MGI Symbol;Acc:MGI:1277991]	2.38459	1.25374	0.000729603
Dhx32	DEAH (Asp-Glu-Ala-His) box polypeptide 32 [Source:MGI Symbol;Acc:MGI:2141813]	2.38308	1.25283	0.00469491
Vnn1	vanin 1 [Source:MGI Symbol;Acc:MGI:108395]	2.38268	1.25258	0.0371298
Smpdl3a	sphingomyelin phosphodiesterase, acid-like 3A [Source:MGI Symbol;Acc:MGI:1931437]	2.38022	1.2511	0.0053428
Chst15	carbohydrate sulfotransferase 15 [Source:MGI Symbol;Acc:MGI:1924840]	2.37639	1.24877	2.97356e-06
4930458D05Rik	RIKEN cDNA 4930458D05 gene [Source:MGI Symbol;Acc:MGI:1923052]	2.37518	1.24804	0.0138016
Cd80	CD80 antigen [Source:MGI Symbol;Acc:MGI:101775]	2.37518	1.24804	0.0312026
Cacng7	calcium channel, voltage-dependent, gamma subunit 7 [Source:MGI Symbol;Acc:MGI:1932374]	2.37332	1.2469	0.0115278
Blvra	biliverdin reductase A [Source:MGI Symbol;Acc:MGI:88170]	2.36882	1.24417	0.000487696
Lbp	lipopolysaccharide binding protein [Source:MGI Symbol;Acc:MGI:1098776]	2.36875	1.24413	0.000544291
Znrf2	zinc and ring finger 2 [Source:MGI Symbol;Acc:MGI:1196246]	2.36704	1.24308	2.95366e-08
Sulf2	sulfatase 2 [Source:MGI Symbol;Acc:MGI:1919293]	2.36617	1.24255	7.53622e-07
Ctsl	cathepsin L [Source:MGI Symbol;Acc:MGI:88564]	2.36594	1.24242	0.00116324
H6pd	hexose-6-phosphate dehydrogenase (glucose 1-dehydrogenase) [Source:MGI Symbol;Acc:MGI:2140356]	2.36576	1.2423	5.03197e-11
Pde4b	phosphodiesterase 4B, cAMP specific [Source:MGI Symbol;Acc:MGI:99557]	2.36431	1.24142	0.0128753
Tmem154	transmembrane protein 154 [Source:MGI Symbol;Acc:MGI:2444725]	2.36405	1.24126	0.0087232
Ccdc88c	coiled-coil domain containing 88C [Source:MGI Symbol;Acc:MGI:1915589]	2.3636	1.24099	0.000294407
Camsap3	calmodulin regulated spectrin-associated protein family, member 3 [Source:MGI Symbol;Acc:MGI:1916947]	2.36228	1.24018	0.0347189
Atp2b4	ATPase, Ca++ transporting, plasma membrane 4 [Source:MGI Symbol;Acc:MGI:88111]	2.3616	1.23976	1.27869e-06
Mkx	mohawk homeobox [Source:MGI Symbol;Acc:MGI:2687286]	2.36033	1.23899	0.0113769
Gfod1	glucose-fructose oxidoreductase domain containing 1 [Source:MGI Symbol;Acc:MGI:2145304]	2.35849	1.23786	0.000120428
Gm5578	predicted pseudogene 5578 [Source:MGI Symbol;Acc:MGI:3645010]	2.3565	1.23664	0.0142691
Cdk14	cyclin-dependent kinase 14 [Source:MGI Symbol;Acc:MGI:894318]	2.35567	1.23614	2.75085e-06
Nos1ap	nitric oxide synthase 1 (neuronal) adaptor protein [Source:MGI Symbol;Acc:MGI:1917979]	2.35356	1.23484	0.00137989
Snhg11	small nucleolar RNA host gene 11 [Source:MGI Symbol;Acc:MGI:2441845]	2.35301	1.23451	0.000992734
Ltbp3	latent transforming growth factor beta binding protein 3 [Source:MGI Symbol;Acc:MGI:1101355]	2.34487	1.22951	0.00560299
Car5b	carbonic anhydrase 5b, mitochondrial [Source:MGI Symbol;Acc:MGI:1926249]	2.34451	1.22929	0.00162842
Jak3	Janus kinase 3 [Source:MGI Symbol;Acc:MGI:99928]	2.34435	1.22919	0.000420587
Pcca	propionyl-Coenzyme A carboxylase, alpha polypeptide [Source:MGI Symbol;Acc:MGI:97499]	2.34365	1.22876	0.000731021
Elmo3	engulfment and cell motility 3 [Source:MGI Symbol;Acc:MGI:2679007]	2.34038	1.22674	0.0182742
Cd37	CD37 antigen [Source:MGI Symbol;Acc:MGI:88330]	2.3384	1.22552	0.041367
5033406O09Rik	RIKEN cDNA 5033406O09 gene [Source:MGI Symbol;Acc:MGI:1923205]	2.33543	1.22369	0.00602684
Slc45a3	solute carrier family 45, member 3 [Source:MGI Symbol;Acc:MGI:1922082]	2.33537	1.22365	0.0397509
Mpp7	membrane protein, palmitoylated 7 (MAGUK p55 subfamily member 7) [Source:MGI Symbol;Acc:MGI:1922989]	2.33334	1.2224	0.00232638
Tbx3	T-box 3 [Source:MGI Symbol;Acc:MGI:98495]	2.33196	1.22154	0.000216748
Plau	plasminogen activator, urokinase [Source:MGI Symbol;Acc:MGI:97611]	2.33089	1.22088	0.00172733
Aox1	aldehyde oxidase 1 [Source:MGI Symbol;Acc:MGI:88035]	2.33086	1.22086	0.00200984
Mettl7b	methyltransferase like 7B [Source:MGI Symbol;Acc:MGI:1918914]	2.32966	1.22012	0.0151659
Arhgap18	Rho GTPase activating protein 18 [Source:MGI Symbol;Acc:MGI:1921160]	2.32855	1.21943	0.00108206
Vldlr	very low density lipoprotein receptor [Source:MGI Symbol;Acc:MGI:98935]	2.32464	1.21701	0.00794414
Itih3	inter-alpha trypsin inhibitor, heavy chain 3 [Source:MGI Symbol;Acc:MGI:96620]	2.32393	1.21657	0.0199592
Scube3	signal peptide, CUB domain, EGF-like 3 [Source:MGI Symbol;Acc:MGI:3045253]	2.32391	1.21656	0.00736917
Gm20721	predicted gene, 20721 [Source:MGI Symbol;Acc:MGI:5313030]	2.32345	1.21627	0.00522134
Pik3r5	phosphoinositide-3-kinase regulatory subunit 5 [Source:MGI Symbol;Acc:MGI:2443588]	2.32165	1.21515	0.0121098
Emb	embigin [Source:MGI Symbol;Acc:MGI:95321]	2.32155	1.21509	0.023497
Hilpda	hypoxia inducible lipid droplet associated [Source:MGI Symbol;Acc:MGI:1916823]	2.32134	1.21496	0.00851073
Pfkp	phosphofructokinase, platelet [Source:MGI Symbol;Acc:MGI:1891833]	2.3202	1.21425	1.21133e-05
Mpp1	membrane protein, palmitoylated [Source:MGI Symbol;Acc:MGI:105941]	2.31854	1.21321	0.0029384
C3	complement component 3 [Source:MGI Symbol;Acc:MGI:88227]	2.31827	1.21305	0.0097123
Adgrl2	adhesion G protein-coupled receptor L2 [Source:MGI Symbol;Acc:MGI:2139714]	2.31646	1.21192	1.8574e-06
Adgre1	adhesion G protein-coupled receptor E1 [Source:MGI Symbol;Acc:MGI:106912]	2.31554	1.21135	0.0111278
Gsto1	glutathione S-transferase omega 1 [Source:MGI Symbol;Acc:MGI:1342273]	2.3146	1.21076	0.00216012
Crlf2	cytokine receptor-like factor 2 [Source:MGI Symbol;Acc:MGI:1889506]	2.31363	1.21016	9.85811e-05
Fads3	fatty acid desaturase 3 [Source:MGI Symbol;Acc:MGI:1928740]	2.31213	1.20922	2.12032e-07
Acta2	actin, alpha 2, smooth muscle, aorta [Source:MGI Symbol;Acc:MGI:87909]	2.31078	1.20838	0.0141526
Blnk	B cell linker [Source:MGI Symbol;Acc:MGI:96878]	2.30888	1.20719	0.0161851
Gm14325	predicted gene 14325 [Source:MGI Symbol;Acc:MGI:3702875]	2.30776	1.20649	0.00428256
Kcna5	potassium voltage-gated channel, shaker-related subfamily, member 5 [Source:MGI Symbol;Acc:MGI:96662]	2.30388	1.20407	0.0344949
Ttc28	tetratricopeptide repeat domain 28 [Source:MGI Symbol;Acc:MGI:2140873]	2.30152	1.20258	0.00115732
Stac	src homology three (SH3) and cysteine rich domain [Source:MGI Symbol;Acc:MGI:1201400]	2.29848	1.20068	0.0172451
Syk	spleen tyrosine kinase [Source:MGI Symbol;Acc:MGI:99515]	2.29774	1.20021	0.013657
Gm14403	predicted gene 14403 [Source:MGI Symbol;Acc:MGI:3649813]	2.29774	1.20021	0.000278975
Gm28876	predicted gene 28876 [Source:MGI Symbol;Acc:MGI:5579582]	2.29618	1.19924	0.020692
Ms4a7	membrane-spanning 4-domains, subfamily A, member 7 [Source:MGI Symbol;Acc:MGI:1918846]	2.29453	1.1982	0.00780649
Gpr141b	G protein-coupled receptor 141B [Source:MGI Symbol;Acc:MGI:2441809]	2.29373	1.19769	0.0475988
Matk	megakaryocyte-associated tyrosine kinase [Source:MGI Symbol;Acc:MGI:99259]	2.29252	1.19694	0.0153852
Thsd4	thrombospondin, type I, domain containing 4 [Source:MGI Symbol;Acc:MGI:2672033]	2.29186	1.19652	0.0128822
Ptx3	pentraxin related gene [Source:MGI Symbol;Acc:MGI:104641]	2.29128	1.19615	0.0149447
Gm10687	predicted gene 10687 [Source:MGI Symbol;Acc:MGI:3642689]	2.28932	1.19492	0.000192904
Ret	ret proto-oncogene [Source:MGI Symbol;Acc:MGI:97902]	2.28853	1.19442	0.00666636
Casz1	castor zinc finger 1 [Source:MGI Symbol;Acc:MGI:1196251]	2.28709	1.19351	0.00334797
Angpt1	angiopoietin 1 [Source:MGI Symbol;Acc:MGI:108448]	2.28651	1.19315	0.0210438
Casp1	caspase 1 [Source:MGI Symbol;Acc:MGI:96544]	2.28571	1.19265	0.00509645
Inhbb	inhibin beta-B [Source:MGI Symbol;Acc:MGI:96571]	2.28471	1.19201	0.00114364
Shank3	SH3 and multiple ankyrin repeat domains 3 [Source:MGI Symbol;Acc:MGI:1930016]	2.28381	1.19144	0.0189704
Ticam2	toll-like receptor adaptor molecule 2 [Source:MGI Symbol;Acc:MGI:3040056]	2.28247	1.1906	0.0214853
Vsir	V-set immunoregulatory receptor [Source:MGI Symbol;Acc:MGI:1921298]	2.2801	1.1891	0.000681205
Gm26703	predicted gene, 26703 [Source:MGI Symbol;Acc:MGI:5477197]	2.27966	1.18882	0.0379434
Pcolce2	procollagen C-endopeptidase enhancer 2 [Source:MGI Symbol;Acc:MGI:1923727]	2.27934	1.18862	0.00413858
Samsn1	SAM domain, SH3 domain and nuclear localization signals, 1 [Source:MGI Symbol;Acc:MGI:1914992]	2.27759	1.18751	0.0139275
Pawr	PRKC, apoptosis, WT1, regulator [Source:MGI Symbol;Acc:MGI:2149961]	2.27748	1.18744	0.00149872
A730046J19Rik	RIKEN cDNA A730046J19 gene [Source:MGI Symbol;Acc:MGI:2442684]	2.27514	1.18596	0.0329603
Tstd3	thiosulfate sulfurtransferase (rhodanese)-like domain containing 3 [Source:MGI Symbol;Acc:MGI:1924282]	2.27431	1.18543	0.00320013
H2-Q7	histocompatibility 2, Q region locus 7 [Source:MGI Symbol;Acc:MGI:95936]	2.27402	1.18524	0.00682805
Wdfy4	WD repeat and FYVE domain containing 4 [Source:MGI Symbol;Acc:MGI:3584510]	2.27397	1.18522	0.00905043
H2-Q6	histocompatibility 2, Q region locus 6 [Source:MGI Symbol;Acc:MGI:95935]	2.27275	1.18444	0.0083459
Hacd2	3-hydroxyacyl-CoA dehydratase 2 [Source:MGI Symbol;Acc:MGI:1918007]	2.27257	1.18433	0.00843691
Zfp827	zinc finger protein 827 [Source:MGI Symbol;Acc:MGI:2444807]	2.26894	1.18202	0.0174034
Slc6a20a	solute carrier family 6 (neurotransmitter transporter), member 20A [Source:MGI Symbol;Acc:MGI:2143217]	2.26814	1.18151	0.0348642
Tcaf2	TRPM8 channel-associated factor 2 [Source:MGI Symbol;Acc:MGI:2385258]	2.26712	1.18086	0.000186251
Fah	fumarylacetoacetate hydrolase [Source:MGI Symbol;Acc:MGI:95482]	2.26591	1.18009	8.32722e-05
Esr1	estrogen receptor 1 (alpha) [Source:MGI Symbol;Acc:MGI:1352467]	2.26392	1.17882	0.00276265
Cdyl2	chromodomain protein, Y chromosome-like 2 [Source:MGI Symbol;Acc:MGI:1923046]	2.26255	1.17795	0.000180565
Oip5	Opa interacting protein 5 [Source:MGI Symbol;Acc:MGI:1917895]	2.26127	1.17713	0.0236453
Actn1	actinin, alpha 1 [Source:MGI Symbol;Acc:MGI:2137706]	2.25933	1.17589	0.000151806
Ms4a6d	membrane-spanning 4-domains, subfamily A, member 6D [Source:MGI Symbol;Acc:MGI:1916024]	2.25787	1.17496	0.00891572
Ankrd29	ankyrin repeat domain 29 [Source:MGI Symbol;Acc:MGI:2687055]	2.25656	1.17412	0.000348489
Rab11fip1	RAB11 family interacting protein 1 (class I) [Source:MGI Symbol;Acc:MGI:1923017]	2.25635	1.17399	1.28012e-05
H2-K1	histocompatibility 2, K1, K region [Source:MGI Symbol;Acc:MGI:95904]	2.25586	1.17368	0.00335888
Pla1a	phospholipase A1 member A [Source:MGI Symbol;Acc:MGI:1934677]	2.25502	1.17314	0.0022893
Spint2	serine protease inhibitor, Kunitz type 2 [Source:MGI Symbol;Acc:MGI:1338031]	2.25442	1.17275	5.66169e-05
Trib3	tribbles pseudokinase 3 [Source:MGI Symbol;Acc:MGI:1345675]	2.25038	1.17017	0.00127209
Bicdl1	BICD family like cargo adaptor 1 [Source:MGI Symbol;Acc:MGI:1922915]	2.25034	1.17014	0.00731638
Lgi2	leucine-rich repeat LGI family, member 2 [Source:MGI Symbol;Acc:MGI:2180196]	2.24739	1.16825	0.00102908
Crim1	cysteine rich transmembrane BMP regulator 1 (chordin like) [Source:MGI Symbol;Acc:MGI:1354756]	2.24719	1.16812	0.00106518
Piezo1	piezo-type mechanosensitive ion channel component 1 [Source:MGI Symbol;Acc:MGI:3603204]	2.24624	1.16751	0.00125198
Pde7a	phosphodiesterase 7A [Source:MGI Symbol;Acc:MGI:1202402]	2.24602	1.16737	8.47288e-05
Ikzf1	IKAROS family zinc finger 1 [Source:MGI Symbol;Acc:MGI:1342540]	2.24565	1.16713	0.0238156
Sod3	superoxide dismutase 3, extracellular [Source:MGI Symbol;Acc:MGI:103181]	2.24514	1.1668	0.0148334
Selenbp1	selenium binding protein 1 [Source:MGI Symbol;Acc:MGI:96825]	2.24484	1.16661	0.00253062
Slco2a1	solute carrier organic anion transporter family, member 2a1 [Source:MGI Symbol;Acc:MGI:1346021]	2.24327	1.1656	0.0123651
Gpr160	G protein-coupled receptor 160 [Source:MGI Symbol;Acc:MGI:1919112]	2.24099	1.16414	0.0122358
Kcnj8	potassium inwardly-rectifying channel, subfamily J, member 8 [Source:MGI Symbol;Acc:MGI:1100508]	2.24024	1.16365	0.00154235
Gpr132	G protein-coupled receptor 132 [Source:MGI Symbol;Acc:MGI:1890220]	2.23862	1.16261	0.0385416
Lpar5	lysophosphatidic acid receptor 5 [Source:MGI Symbol;Acc:MGI:2685918]	2.23832	1.16242	0.0386172
Pik3r6	phosphoinositide-3-kinase regulatory subunit 5 [Source:MGI Symbol;Acc:MGI:2144613]	2.2368	1.16144	0.00127209
Otop1	otopetrin 1 [Source:MGI Symbol;Acc:MGI:2388363]	2.23623	1.16107	0.0200218
Arhgap20	Rho GTPase activating protein 20 [Source:MGI Symbol;Acc:MGI:2445175]	2.23543	1.16055	0.00403754
Apcdd1	adenomatosis polyposis coli down-regulated 1 [Source:MGI Symbol;Acc:MGI:3513977]	2.23328	1.15916	0.000159877
Ccrl2	chemokine (C-C motif) receptor-like 2 [Source:MGI Symbol;Acc:MGI:1920904]	2.23253	1.15868	0.00214294
Pdgfc	platelet-derived growth factor, C polypeptide [Source:MGI Symbol;Acc:MGI:1859631]	2.23079	1.15756	4.67143e-05
Rasgrf2	RAS protein-specific guanine nucleotide-releasing factor 2 [Source:MGI Symbol;Acc:MGI:109137]	2.23048	1.15735	0.001425
Ada	adenosine deaminase [Source:MGI Symbol;Acc:MGI:87916]	2.23004	1.15707	0.0156211
Csf2rb	colony stimulating factor 2 receptor, beta, low-affinity (granulocyte-macrophage) [Source:MGI Symbol;Acc:MGI:1339759]	2.22846	1.15605	9.45857e-05
Dennd4a	DENN/MADD domain containing 4A [Source:MGI Symbol;Acc:MGI:2142979]	2.22764	1.15551	0.00224085
Tmed5	transmembrane p24 trafficking protein 5 [Source:MGI Symbol;Acc:MGI:1921586]	2.22599	1.15444	0.0191489
Fitm2	fat storage-inducing transmembrane protein 2 [Source:MGI Symbol;Acc:MGI:2444508]	2.22594	1.15441	8.90168e-05
Dact2	dishevelled-binding antagonist of beta-catenin 2 [Source:MGI Symbol;Acc:MGI:1920347]	2.22514	1.1539	0.0173506
Dcaf12l1	DDB1 and CUL4 associated factor 12-like 1 [Source:MGI Symbol;Acc:MGI:2444462]	2.22426	1.15332	0.0213958
Mlxipl	MLX interacting protein-like [Source:MGI Symbol;Acc:MGI:1927999]	2.22422	1.1533	0.000456776
St6galnac5	ST6 (alpha-N-acetyl-neuraminyl-2,3-beta-galactosyl-1,3)-N-acetylgalactosaminide alpha-2,6-sialyltransferase 5 [Source:MGI Symbol;Acc:MGI:1349471]	2.22221	1.15199	0.000439306
Fas	Fas (TNF receptor superfamily member 6) [Source:MGI Symbol;Acc:MGI:95484]	2.21981	1.15044	9.94645e-05
Tgm2	transglutaminase 2, C polypeptide [Source:MGI Symbol;Acc:MGI:98731]	2.21945	1.1502	8.005e-05
Trim14	tripartite motif-containing 14 [Source:MGI Symbol;Acc:MGI:1921985]	2.21564	1.14772	0.00295694
Etl4	enhancer trap locus 4 [Source:MGI Symbol;Acc:MGI:95454]	2.21524	1.14746	9.54226e-05
Ccng1	cyclin G1 [Source:MGI Symbol;Acc:MGI:102890]	2.21492	1.14725	0.0440089
Pth1r	parathyroid hormone 1 receptor [Source:MGI Symbol;Acc:MGI:97801]	2.21273	1.14583	0.00577207
Ttc39b	tetratricopeptide repeat domain 39B [Source:MGI Symbol;Acc:MGI:1917113]	2.21228	1.14553	0.00050927
Bid	BH3 interacting domain death agonist [Source:MGI Symbol;Acc:MGI:108093]	2.21123	1.14485	0.00417138
2810032G03Rik	RIKEN cDNA 2810032G03 gene [Source:MGI Symbol;Acc:MGI:1919919]	2.21122	1.14484	0.00774062
Bnip3	BCL2/adenovirus E1B interacting protein 3 [Source:MGI Symbol;Acc:MGI:109326]	2.21093	1.14465	0.00837313
Rbpms2	RNA binding protein with multiple splicing 2 [Source:MGI Symbol;Acc:MGI:1919223]	2.20981	1.14392	8.38908e-07
Zbtb16	zinc finger and BTB domain containing 16 [Source:MGI Symbol;Acc:MGI:103222]	2.20927	1.14357	0.00854962
Zfp185	zinc finger protein 185 [Source:MGI Symbol;Acc:MGI:108095]	2.20895	1.14336	3.54287e-06
Hipk2	homeodomain interacting protein kinase 2 [Source:MGI Symbol;Acc:MGI:1314872]	2.20863	1.14315	4.90725e-06
Crybg1	crystallin beta-gamma domain containing 1 [Source:MGI Symbol;Acc:MGI:109544]	2.20732	1.14229	2.68253e-06
Sec31b	Sec31 homolog B (S. cerevisiae) [Source:MGI Symbol;Acc:MGI:2685187]	2.2051	1.14084	0.000209891
L3hypdh	L-3-hydroxyproline dehydratase (trans-) [Source:MGI Symbol;Acc:MGI:1914467]	2.2024	1.13908	0.00111977
Pik3cb	phosphatidylinositol-4,5-bisphosphate 3-kinase catalytic subunit beta [Source:MGI Symbol;Acc:MGI:1922019]	2.20148	1.13847	0.000169029
Htr7	5-hydroxytryptamine (serotonin) receptor 7 [Source:MGI Symbol;Acc:MGI:99841]	2.20136	1.13839	0.0430119
Fam160a1	family with sequence similarity 160, member A1 [Source:MGI Symbol;Acc:MGI:2444746]	2.19939	1.13711	0.000483955
Cpeb3	cytoplasmic polyadenylation element binding protein 3 [Source:MGI Symbol;Acc:MGI:2443075]	2.19504	1.13425	3.99403e-08
Prps1	phosphoribosyl pyrophosphate synthetase 1 [Source:MGI Symbol;Acc:MGI:97775]	2.19482	1.1341	0.000425886
Alas1	aminolevulinic acid synthase 1 [Source:MGI Symbol;Acc:MGI:87989]	2.1939	1.13349	0.00127585
Psma8	proteasome (prosome, macropain) subunit, alpha type, 8 [Source:MGI Symbol;Acc:MGI:1920927]	2.19109	1.13165	0.0407305
Gja4	gap junction protein, alpha 4 [Source:MGI Symbol;Acc:MGI:95715]	2.189	1.13027	5.61631e-06
Ablim2	actin-binding LIM protein 2 [Source:MGI Symbol;Acc:MGI:2385758]	2.18895	1.13024	0.0108306
Slc18a2	solute carrier family 18 (vesicular monoamine), member 2 [Source:MGI Symbol;Acc:MGI:106677]	2.18781	1.12949	0.0454398
Pltp	phospholipid transfer protein [Source:MGI Symbol;Acc:MGI:103151]	2.18519	1.12776	2.56632e-05
Adamts12	a disintegrin-like and metallopeptidase (reprolysin type) with thrombospondin type 1 motif, 12 [Source:MGI Symbol;Acc:MGI:2146046]	2.18517	1.12774	0.0214853
Epb41l1	erythrocyte membrane protein band 4.1 like 1 [Source:MGI Symbol;Acc:MGI:103010]	2.1828	1.12618	7.32914e-08
Esyt1	extended synaptotagmin-like protein 1 [Source:MGI Symbol;Acc:MGI:1344426]	2.18199	1.12565	1.0439e-07
Vstm2b	V-set and transmembrane domain containing 2B [Source:MGI Symbol;Acc:MGI:1914525]	2.17943	1.12395	0.0496395
Col4a6	collagen, type IV, alpha 6 [Source:MGI Symbol;Acc:MGI:2152695]	2.17919	1.12379	0.00448905
Kit	KIT proto-oncogene receptor tyrosine kinase [Source:MGI Symbol;Acc:MGI:96677]	2.17903	1.12368	0.000918109
Cxcl1	chemokine (C-X-C motif) ligand 1 [Source:MGI Symbol;Acc:MGI:108068]	2.1787	1.12347	0.0184612
Asns	asparagine synthetase [Source:MGI Symbol;Acc:MGI:1350929]	2.1784	1.12327	0.00291215
Il15ra	interleukin 15 receptor, alpha chain [Source:MGI Symbol;Acc:MGI:104644]	2.17664	1.1221	0.000432305
Prkch	protein kinase C, eta [Source:MGI Symbol;Acc:MGI:97600]	2.17091	1.1183	2.94175e-06
Slfn10-ps	schlafen 10, pseudogene [Source:MGI Symbol;Acc:MGI:3512288]	2.16818	1.11649	0.00956997
Sfxn5	sideroflexin 5 [Source:MGI Symbol;Acc:MGI:2137681]	2.16808	1.11642	0.000123244
Fli1	Friend leukemia integration 1 [Source:MGI Symbol;Acc:MGI:95554]	2.16718	1.11582	0.00417133
Ptgir	prostaglandin I receptor (IP) [Source:MGI Symbol;Acc:MGI:99535]	2.167	1.1157	0.000180155
Mrc1	mannose receptor, C type 1 [Source:MGI Symbol;Acc:MGI:97142]	2.16669	1.11549	0.00458958
Ehbp1l1	EH domain binding protein 1-like 1 [Source:MGI Symbol;Acc:MGI:3612340]	2.16664	1.11546	2.2298e-07
Bmp3	bone morphogenetic protein 3 [Source:MGI Symbol;Acc:MGI:88179]	2.1651	1.11443	0.0331982
Btk	Bruton agammaglobulinemia tyrosine kinase [Source:MGI Symbol;Acc:MGI:88216]	2.16484	1.11426	0.0275021
Sox18	SRY (sex determining region Y)-box 18 [Source:MGI Symbol;Acc:MGI:103559]	2.16375	1.11353	0.0351183
Tnfrsf1b	tumor necrosis factor receptor superfamily, member 1b [Source:MGI Symbol;Acc:MGI:1314883]	2.16155	1.11207	0.01231
Ttc7b	tetratricopeptide repeat domain 7B [Source:MGI Symbol;Acc:MGI:2144724]	2.16019	1.11116	6.02673e-05
Anxa1	annexin A1 [Source:MGI Symbol;Acc:MGI:96819]	2.1601	1.1111	9.15222e-05
Hoxc10	homeobox C10 [Source:MGI Symbol;Acc:MGI:96192]	2.15994	1.11099	8.02015e-06
Rbm28	RNA binding motif protein 28 [Source:MGI Symbol;Acc:MGI:2655711]	2.15954	1.11073	0.00106623
Siglec1	sialic acid binding Ig-like lectin 1, sialoadhesin [Source:MGI Symbol;Acc:MGI:99668]	2.15942	1.11064	0.00704388
Rtp3	receptor transporter protein 3 [Source:MGI Symbol;Acc:MGI:2446841]	2.15737	1.10927	0.0122424
Ccr2	chemokine (C-C motif) receptor 2 [Source:MGI Symbol;Acc:MGI:106185]	2.15004	1.10437	0.0328868
Abcg3	ATP binding cassette subfamily G member 3 [Source:MGI Symbol;Acc:MGI:1351624]	2.14948	1.10399	0.0391067
Tbc1d4	TBC1 domain family, member 4 [Source:MGI Symbol;Acc:MGI:2429660]	2.14868	1.10345	4.1467e-05
Dgkh	diacylglycerol kinase, eta [Source:MGI Symbol;Acc:MGI:2444188]	2.1459	1.10158	0.00239753
Robo1	roundabout guidance receptor 1 [Source:MGI Symbol;Acc:MGI:1274781]	2.14556	1.10135	0.00136941
Vav3	vav 3 oncogene [Source:MGI Symbol;Acc:MGI:1888518]	2.14535	1.10121	0.00387614
Edem1	ER degradation enhancer, mannosidase alpha-like 1 [Source:MGI Symbol;Acc:MGI:2180139]	2.14468	1.10076	1.04661e-05
Myo1f	myosin IF [Source:MGI Symbol;Acc:MGI:107711]	2.14266	1.0994	0.0304724
Atp8b5	ATPase, class I, type 8B, member 5 [Source:MGI Symbol;Acc:MGI:2444287]	2.13972	1.09742	0.0229233
Lpin1	lipin 1 [Source:MGI Symbol;Acc:MGI:1891340]	2.13963	1.09736	0.00356594
B3galt1	UDP-Gal:betaGlcNAc beta 1,3-galactosyltransferase, polypeptide 1 [Source:MGI Symbol;Acc:MGI:1349403]	2.13864	1.09669	0.0455951
Zfp971	zinc finger protein 971 [Source:MGI Symbol;Acc:MGI:1261426]	2.13832	1.09648	0.00058803
Arap2	ArfGAP with RhoGAP domain, ankyrin repeat and PH domain 2 [Source:MGI Symbol;Acc:MGI:2684416]	2.13752	1.09594	0.000938582
Rftn1	raftlin lipid raft linker 1 [Source:MGI Symbol;Acc:MGI:1923688]	2.13722	1.09574	0.000103109
Agpat2	1-acylglycerol-3-phosphate O-acyltransferase 2 (lysophosphatidic acid acyltransferase, beta) [Source:MGI Symbol;Acc:MGI:1914762]	2.13636	1.09516	0.0480142
Alpl	alkaline phosphatase, liver/bone/kidney [Source:MGI Symbol;Acc:MGI:87983]	2.1336	1.09329	5.52239e-05
Epas1	endothelial PAS domain protein 1 [Source:MGI Symbol;Acc:MGI:109169]	2.13201	1.09221	1.81588e-07
Slc1a4	solute carrier family 1 (glutamate/neutral amino acid transporter), member 4 [Source:MGI Symbol;Acc:MGI:2135601]	2.13167	1.09198	0.0123184
Enpp3	ectonucleotide pyrophosphatase/phosphodiesterase 3 [Source:MGI Symbol;Acc:MGI:2143702]	2.1276	1.08923	0.0246916
Pcdh17	protocadherin 17 [Source:MGI Symbol;Acc:MGI:2684924]	2.12463	1.08721	0.00298601
Slc2a9	solute carrier family 2 (facilitated glucose transporter), member 9 [Source:MGI Symbol;Acc:MGI:2152844]	2.12451	1.08713	0.0166834
Slc18b1	solute carrier family 18, subfamily B, member 1 [Source:MGI Symbol;Acc:MGI:1923556]	2.12291	1.08604	2.30349e-05
Adamts5	a disintegrin-like and metallopeptidase (reprolysin type) with thrombospondin type 1 motif, 5 (aggrecanase-2) [Source:MGI Symbol;Acc:MGI:1346321]	2.1213	1.08495	0.0033051
Ptafr	platelet-activating factor receptor [Source:MGI Symbol;Acc:MGI:106066]	2.11869	1.08317	0.0243094
Sp140	Sp140 nuclear body protein [Source:MGI Symbol;Acc:MGI:3702467]	2.11831	1.08291	0.00850033
Impdh1	inosine monophosphate dehydrogenase 1 [Source:MGI Symbol;Acc:MGI:96567]	2.11762	1.08245	4.64569e-05
Mnd1	meiotic nuclear divisions 1 [Source:MGI Symbol;Acc:MGI:1924165]	2.11494	1.08062	0.0383579
Kif26a	kinesin family member 26A [Source:MGI Symbol;Acc:MGI:2447072]	2.11329	1.07949	0.04388
Thrb	thyroid hormone receptor beta [Source:MGI Symbol;Acc:MGI:98743]	2.10988	1.07716	0.000372946
Lcp1	lymphocyte cytosolic protein 1 [Source:MGI Symbol;Acc:MGI:104808]	2.10947	1.07688	0.0246325
Moxd1	monooxygenase, DBH-like 1 [Source:MGI Symbol;Acc:MGI:1921582]	2.10808	1.07593	0.00238452
Nme4	NME/NM23 nucleoside diphosphate kinase 4 [Source:MGI Symbol;Acc:MGI:1931148]	2.10741	1.07547	0.00153041
Atl2	atlastin GTPase 2 [Source:MGI Symbol;Acc:MGI:1929492]	2.10685	1.07509	0.015759
Zfp970	zinc finger protein 970 [Source:MGI Symbol;Acc:MGI:3652255]	2.10675	1.07502	5.35667e-05
Tpd52l1	tumor protein D52-like 1 [Source:MGI Symbol;Acc:MGI:1298386]	2.10619	1.07463	0.00271907
Myo1g	myosin IG [Source:MGI Symbol;Acc:MGI:1927091]	2.10583	1.07439	0.0414274
Apmap	adipocyte plasma membrane associated protein [Source:MGI Symbol;Acc:MGI:1919131]	2.10333	1.07268	0.00123297
Msrb2	methionine sulfoxide reductase B2 [Source:MGI Symbol;Acc:MGI:1923717]	2.10058	1.07079	0.00483246
Anxa6	annexin A6 [Source:MGI Symbol;Acc:MGI:88255]	2.09775	1.06884	1.47816e-05
Ifi207	interferon activated gene 207 [Source:MGI Symbol;Acc:MGI:2138302]	2.09772	1.06882	0.00393036
Boc	biregional cell adhesion molecule-related/down-regulated by oncogenes (Cdon) binding protein [Source:MGI Symbol;Acc:MGI:2151153]	2.0957	1.06743	0.00229682
Gale	galactose-4-epimerase, UDP [Source:MGI Symbol;Acc:MGI:1921496]	2.09568	1.06742	0.00826018
Gm26797	predicted gene, 26797 [Source:MGI Symbol;Acc:MGI:5477291]	2.09508	1.06701	0.0069617
Rasgrp3	RAS, guanyl releasing protein 3 [Source:MGI Symbol;Acc:MGI:3028579]	2.0937	1.06605	0.00941424
Tnfrsf21	tumor necrosis factor receptor superfamily, member 21 [Source:MGI Symbol;Acc:MGI:2151075]	2.09365	1.06602	0.000491694
Pitpnm3	PITPNM family member 3 [Source:MGI Symbol;Acc:MGI:2685726]	2.09345	1.06588	0.0391114
Gsdme	gasdermin E [Source:MGI Symbol;Acc:MGI:1889850]	2.09181	1.06475	0.000441475
Mdga1	MAM domain containing glycosylphosphatidylinositol anchor 1 [Source:MGI Symbol;Acc:MGI:1922012]	2.09174	1.0647	0.0336625
Pex16	peroxisomal biogenesis factor 16 [Source:MGI Symbol;Acc:MGI:1338829]	2.0903	1.06371	0.00827598
Sync	syncoilin [Source:MGI Symbol;Acc:MGI:1916078]	2.08821	1.06227	0.0497847
Osr1	odd-skipped related transcription factor 1 [Source:MGI Symbol;Acc:MGI:1344424]	2.0872	1.06157	0.0138341
Nek2	NIMA (never in mitosis gene a)-related expressed kinase 2 [Source:MGI Symbol;Acc:MGI:109359]	2.08605	1.06077	0.0084954
Chst11	carbohydrate sulfotransferase 11 [Source:MGI Symbol;Acc:MGI:1927166]	2.08591	1.06067	2.22033e-05
Map3k20	mitogen-activated protein kinase kinase kinase 20 [Source:MGI Symbol;Acc:MGI:2443258]	2.08546	1.06037	0.00685619
Irs3	insulin receptor substrate 3 [Source:MGI Symbol;Acc:MGI:1194882]	2.08544	1.06035	0.0133962
Fcna	ficolin A [Source:MGI Symbol;Acc:MGI:1340905]	2.08498	1.06004	0.0452164
Pcx	pyruvate carboxylase [Source:MGI Symbol;Acc:MGI:97520]	2.08466	1.05981	0.0400087
Comp	cartilage oligomeric matrix protein [Source:MGI Symbol;Acc:MGI:88469]	2.08422	1.05951	0.0284629
Myct1	myc target 1 [Source:MGI Symbol;Acc:MGI:1915882]	2.08209	1.05803	0.00245159
Klhdc9	kelch domain containing 9 [Source:MGI Symbol;Acc:MGI:1916124]	2.08168	1.05775	0.0477943
Psd4	pleckstrin and Sec7 domain containing 4 [Source:MGI Symbol;Acc:MGI:2674093]	2.08154	1.05765	0.0473454
Ak2	adenylate kinase 2 [Source:MGI Symbol;Acc:MGI:87978]	2.08148	1.05761	0.00189658
Ric3	RIC3 acetylcholine receptor chaperone [Source:MGI Symbol;Acc:MGI:2443887]	2.08125	1.05745	0.00331257
Junos	jun proto-oncogene, opposite strand [Source:MGI Symbol;Acc:MGI:2652837]	2.07982	1.05646	0.0217533
Slc1a5	solute carrier family 1 (neutral amino acid transporter), member 5 [Source:MGI Symbol;Acc:MGI:105305]	2.07836	1.05544	0.000268123
Syap1	synapse associated protein 1 [Source:MGI Symbol;Acc:MGI:1914293]	2.0778	1.05506	0.00250216
Adh1	alcohol dehydrogenase 1 (class I) [Source:MGI Symbol;Acc:MGI:87921]	2.07645	1.05412	0.0249604
Cpq	carboxypeptidase Q [Source:MGI Symbol;Acc:MGI:1889205]	2.07635	1.05405	0.00449306
Cpt2	carnitine palmitoyltransferase 2 [Source:MGI Symbol;Acc:MGI:109176]	2.07495	1.05308	0.00258104
Dnm3os	dynamin 3, opposite strand [Source:MGI Symbol;Acc:MGI:3052332]	2.07366	1.05218	0.0406745
Dse	dermatan sulfate epimerase [Source:MGI Symbol;Acc:MGI:2443455]	2.07319	1.05186	0.00379109
1600014C10Rik	RIKEN cDNA 1600014C10 gene [Source:MGI Symbol;Acc:MGI:1919494]	2.0719	1.05095	0.000795024
Nckap5	NCK-associated protein 5 [Source:MGI Symbol;Acc:MGI:2686394]	2.07169	1.05081	0.0084954
Zim1	zinc finger, imprinted 1 [Source:MGI Symbol;Acc:MGI:1341879]	2.07022	1.04979	0.0177853
Pctp	phosphatidylcholine transfer protein [Source:MGI Symbol;Acc:MGI:107375]	2.06738	1.0478	0.00145825
Pim1	proviral integration site 1 [Source:MGI Symbol;Acc:MGI:97584]	2.06738	1.0478	0.000239418
Dock4	dedicator of cytokinesis 4 [Source:MGI Symbol;Acc:MGI:1918006]	2.06314	1.04484	1.87439e-08
Igfbp4	insulin-like growth factor binding protein 4 [Source:MGI Symbol;Acc:MGI:96439]	2.06069	1.04313	0.0159875
Man2b1	mannosidase 2, alpha B1 [Source:MGI Symbol;Acc:MGI:107286]	2.05864	1.04169	0.000311518
Slc11a1	solute carrier family 11 (proton-coupled divalent metal ion transporters), member 1 [Source:MGI Symbol;Acc:MGI:1345275]	2.05851	1.0416	0.0117083
Msrb3	methionine sulfoxide reductase B3 [Source:MGI Symbol;Acc:MGI:2443538]	2.05787	1.04115	0.000256284
AW112010	expressed sequence AW112010 [Source:MGI Symbol;Acc:MGI:2147706]	2.05686	1.04044	0.0329875
Rgs5	regulator of G-protein signaling 5 [Source:MGI Symbol;Acc:MGI:1098434]	2.05518	1.03926	0.00898318
Fzd5	frizzled class receptor 5 [Source:MGI Symbol;Acc:MGI:108571]	2.05464	1.03889	0.000939386
Hfe	homeostatic iron regulator [Source:MGI Symbol;Acc:MGI:109191]	2.04259	1.0304	0.0277457
Ces2g	carboxylesterase 2G [Source:MGI Symbol;Acc:MGI:1919611]	2.04246	1.03031	0.0229886
1110008P14Rik	RIKEN cDNA 1110008P14 gene [Source:MGI Symbol;Acc:MGI:1920987]	2.04244	1.03029	0.0205607
Tbxas1	thromboxane A synthase 1, platelet [Source:MGI Symbol;Acc:MGI:98497]	2.04094	1.02924	0.00596795
Gm14295	predicted gene 14295 [Source:MGI Symbol;Acc:MGI:3709624]	2.04071	1.02907	0.000432305
Colca2	COLCA2 homolog [Source:MGI Symbol;Acc:MGI:2685530]	2.03975	1.0284	0.0140076
Pgd	phosphogluconate dehydrogenase [Source:MGI Symbol;Acc:MGI:97553]	2.03662	1.02617	0.00428256
Ebf3	early B cell factor 3 [Source:MGI Symbol;Acc:MGI:894289]	2.03649	1.02608	0.0028101
Il17ra	interleukin 17 receptor A [Source:MGI Symbol;Acc:MGI:107399]	2.03466	1.02479	0.000621164
Nr1h4	nuclear receptor subfamily 1, group H, member 4 [Source:MGI Symbol;Acc:MGI:1352464]	2.03216	1.02302	0.0246442
Tmem216	transmembrane protein 216 [Source:MGI Symbol;Acc:MGI:1920020]	2.03213	1.02299	0.0132398
Peg10	paternally expressed 10 [Source:MGI Symbol;Acc:MGI:2157785]	2.0304	1.02176	0.00123109
Acox1	acyl-Coenzyme A oxidase 1, palmitoyl [Source:MGI Symbol;Acc:MGI:1330812]	2.02962	1.02121	0.00145895
Gm37233	predicted gene, 37233 [Source:MGI Symbol;Acc:MGI:5610461]	2.02936	1.02103	0.00516779
Pfkl	phosphofructokinase, liver, B-type [Source:MGI Symbol;Acc:MGI:97547]	2.02914	1.02087	0.000341597
Elk3	ELK3, member of ETS oncogene family [Source:MGI Symbol;Acc:MGI:101762]	2.02775	1.01988	6.50878e-06
Hoxa10	homeobox A10 [Source:MGI Symbol;Acc:MGI:96171]	2.02758	1.01976	0.000254049
Tanc1	tetratricopeptide repeat, ankyrin repeat and coiled-coil containing 1 [Source:MGI Symbol;Acc:MGI:1914110]	2.02612	1.01872	2.41151e-13
Pak3	p21 (RAC1) activated kinase 3 [Source:MGI Symbol;Acc:MGI:1339656]	2.02513	1.01801	4.85017e-06
Etfa	electron transferring flavoprotein, alpha polypeptide [Source:MGI Symbol;Acc:MGI:106092]	2.02335	1.01674	0.00182855
Ppp2r5a	protein phosphatase 2, regulatory subunit B', alpha [Source:MGI Symbol;Acc:MGI:2388479]	2.02187	1.01569	8.91365e-08
Pex11a	peroxisomal biogenesis factor 11 alpha [Source:MGI Symbol;Acc:MGI:1338788]	2.02174	1.0156	0.00683016
Zfp697	zinc finger protein 697 [Source:MGI Symbol;Acc:MGI:2139736]	2.02149	1.01542	4.64808e-06
Map7	microtubule-associated protein 7 [Source:MGI Symbol;Acc:MGI:1328328]	2.02018	1.01448	0.0171862
Slc22a18	solute carrier family 22 (organic cation transporter), member 18 [Source:MGI Symbol;Acc:MGI:1336884]	2.01923	1.01381	0.00115732
Igfbp3	insulin-like growth factor binding protein 3 [Source:MGI Symbol;Acc:MGI:96438]	2.01857	1.01333	0.0279782
Lpxn	leupaxin [Source:MGI Symbol;Acc:MGI:2147677]	2.01705	1.01224	0.0360838
Slc41a3	solute carrier family 41, member 3 [Source:MGI Symbol;Acc:MGI:1918949]	2.01522	1.01094	0.000106549
Mdfic	MyoD family inhibitor domain containing [Source:MGI Symbol;Acc:MGI:104611]	2.01152	1.00829	0.00226882
Cyyr1	cysteine and tyrosine-rich protein 1 [Source:MGI Symbol;Acc:MGI:2152187]	2.0108	1.00777	6.19311e-13
Diaph1	diaphanous related formin 1 [Source:MGI Symbol;Acc:MGI:1194490]	2.01056	1.00759	3.28683e-06
Hrh2	histamine receptor H2 [Source:MGI Symbol;Acc:MGI:108482]	2.01015	1.0073	0.0486803
Gadd45g	growth arrest and DNA-damage-inducible 45 gamma [Source:MGI Symbol;Acc:MGI:1346325]	2.00888	1.00639	0.0158522
Dera	deoxyribose-phosphate aldolase (putative) [Source:MGI Symbol;Acc:MGI:1913762]	2.00777	1.00559	0.0372503
Ppargc1b	peroxisome proliferative activated receptor, gamma, coactivator 1 beta [Source:MGI Symbol;Acc:MGI:2444934]	2.00626	1.00451	0.01944
Kng2	kininogen 2 [Source:MGI Symbol;Acc:MGI:3027157]	2.00567	1.00408	0.00284561
Ets1	E26 avian leukemia oncogene 1, 5' domain [Source:MGI Symbol;Acc:MGI:95455]	2.00526	1.00379	0.00250228
Gm15326	predicted gene 15326 [Source:MGI Symbol;Acc:MGI:3705205]	2.00413	1.00298	0.0389872
Loxl4	lysyl oxidase-like 4 [Source:MGI Symbol;Acc:MGI:1914823]	2.00232	1.00168	0.0159729
Idh3a	isocitrate dehydrogenase 3 (NAD+) alpha [Source:MGI Symbol;Acc:MGI:1915084]	2.00118	1.00085	0.0233984
Cubn	cubilin (intrinsic factor-cobalamin receptor) [Source:MGI Symbol;Acc:MGI:1931256]	2.00074	1.00053	0.0333339
NA	NA	0.499859	-1.00041	0.00841459
Calhm5	calcium homeostasis modulator family member 5 [Source:MGI Symbol;Acc:MGI:2143897]	0.498865	-1.00328	1.65393e-05
St6gal1	beta galactoside alpha 2,6 sialyltransferase 1 [Source:MGI Symbol;Acc:MGI:108470]	0.498272	-1.00499	3.91661e-05
Metrnl	meteorin, glial cell differentiation regulator-like [Source:MGI Symbol;Acc:MGI:2384806]	0.497771	-1.00645	9.16984e-07
Ecscr	endothelial cell surface expressed chemotaxis and apoptosis regulator [Source:MGI Symbol;Acc:MGI:1915795]	0.49676	-1.00938	1.11282e-06
Klrb1a	killer cell lectin-like receptor subfamily B member 1A [Source:MGI Symbol;Acc:MGI:107540]	0.49668	-1.00961	0.00100755
S100b	S100 protein, beta polypeptide, neural [Source:MGI Symbol;Acc:MGI:98217]	0.496354	-1.01056	0.0148664
Cadm4	cell adhesion molecule 4 [Source:MGI Symbol;Acc:MGI:2449088]	0.495734	-1.01236	0.0411427
Trp53cor1	tumor protein p53 pathway corepressor 1 [Source:MGI Symbol;Acc:MGI:3801771]	0.494433	-1.01615	0.0124087
Chn2	chimerin 2 [Source:MGI Symbol;Acc:MGI:1917243]	0.494358	-1.01637	0.000447512
Cnp	2',3'-cyclic nucleotide 3' phosphodiesterase [Source:MGI Symbol;Acc:MGI:88437]	0.492946	-1.0205	0.00309933
Bri3bp	Bri3 binding protein [Source:MGI Symbol;Acc:MGI:1924059]	0.492707	-1.0212	0.000259066
Itgae	integrin alpha E, epithelial-associated [Source:MGI Symbol;Acc:MGI:1298377]	0.492645	-1.02138	0.0186803
Frmd3	FERM domain containing 3 [Source:MGI Symbol;Acc:MGI:2442466]	0.491989	-1.0233	2.67837e-05
Ddah1	dimethylarginine dimethylaminohydrolase 1 [Source:MGI Symbol;Acc:MGI:1916469]	0.491337	-1.02522	0.00227918
Nek1	NIMA (never in mitosis gene a)-related expressed kinase 1 [Source:MGI Symbol;Acc:MGI:97303]	0.490024	-1.02908	3.91661e-05
Ccdc40	coiled-coil domain containing 40 [Source:MGI Symbol;Acc:MGI:2443893]	0.488103	-1.03474	0.00650432
Itga2b	integrin alpha 2b [Source:MGI Symbol;Acc:MGI:96601]	0.484425	-1.04565	0.00137819
Mfap5	microfibrillar associated protein 5 [Source:MGI Symbol;Acc:MGI:1354387]	0.484365	-1.04583	1.50678e-05
Gm4117	predicted gene 4117 [Source:MGI Symbol;Acc:MGI:3782293]	0.483992	-1.04695	0.00357665
Art4	ADP-ribosyltransferase 4 [Source:MGI Symbol;Acc:MGI:1202710]	0.483303	-1.049	0.0110122
Ppp1r16b	protein phosphatase 1, regulatory subunit 16B [Source:MGI Symbol;Acc:MGI:2151841]	0.481152	-1.05544	6.27282e-05
Tet1	tet methylcytosine dioxygenase 1 [Source:MGI Symbol;Acc:MGI:1098693]	0.480568	-1.05719	5.66169e-05
Kctd11	potassium channel tetramerisation domain containing 11 [Source:MGI Symbol;Acc:MGI:2448712]	0.480232	-1.0582	0.00030403
Ttc9	tetratricopeptide repeat domain 9 [Source:MGI Symbol;Acc:MGI:1916730]	0.480082	-1.05865	0.00736917
Serpinb6b	serine (or cysteine) peptidase inhibitor, clade B, member 6b [Source:MGI Symbol;Acc:MGI:894688]	0.479467	-1.0605	4.88431e-07
Ndp	Norrie disease (pseudoglioma) (human) [Source:MGI Symbol;Acc:MGI:102570]	0.478962	-1.06202	0.0105798
Magix	MAGI family member, X-linked [Source:MGI Symbol;Acc:MGI:1859644]	0.478754	-1.06264	0.00127209
Nkain2	Na+/K+ transporting ATPase interacting 2 [Source:MGI Symbol;Acc:MGI:1923447]	0.478627	-1.06302	0.000226699
Epyc	epiphycan [Source:MGI Symbol;Acc:MGI:107942]	0.477051	-1.06778	0.00210502
Prr15	proline rich 15 [Source:MGI Symbol;Acc:MGI:1925254]	0.476794	-1.06856	0.0234077
Bicd1	BICD cargo adaptor 1 [Source:MGI Symbol;Acc:MGI:1101760]	0.475928	-1.07118	0.000469058
Nrcam	neuronal cell adhesion molecule [Source:MGI Symbol;Acc:MGI:104750]	0.475273	-1.07317	0.00192333
Mfap4	microfibrillar-associated protein 4 [Source:MGI Symbol;Acc:MGI:1342276]	0.4744	-1.07583	0.00535156
Rasgef1c	RasGEF domain family, member 1C [Source:MGI Symbol;Acc:MGI:1921813]	0.474396	-1.07584	0.0122372
E230001N04Rik	RIKEN cDNA E230001N04 gene [Source:MGI Symbol;Acc:MGI:2443549]	0.474043	-1.07691	0.0421615
Gldn	gliomedin [Source:MGI Symbol;Acc:MGI:2388361]	0.473881	-1.0774	0.018046
Nr4a1	nuclear receptor subfamily 4, group A, member 1 [Source:MGI Symbol;Acc:MGI:1352454]	0.473473	-1.07865	0.00535156
Fxyd3	FXYD domain-containing ion transport regulator 3 [Source:MGI Symbol;Acc:MGI:107497]	0.472432	-1.08182	0.000466464
Cers2	ceramide synthase 2 [Source:MGI Symbol;Acc:MGI:1924143]	0.47226	-1.08235	8.21944e-07
Tll1	tolloid-like [Source:MGI Symbol;Acc:MGI:106923]	0.471706	-1.08404	5.26225e-05
Tsc22d4	TSC22 domain family, member 4 [Source:MGI Symbol;Acc:MGI:1926079]	0.471566	-1.08447	0.00850033
Secisbp2l	SECIS binding protein 2-like [Source:MGI Symbol;Acc:MGI:1917604]	0.471141	-1.08577	0.00101679
Gm37033	predicted gene, 37033 [Source:MGI Symbol;Acc:MGI:5610261]	0.471094	-1.08591	0.0284546
Ptprn	protein tyrosine phosphatase, receptor type, N [Source:MGI Symbol;Acc:MGI:102765]	0.471007	-1.08618	0.0299859
Tmem117	transmembrane protein 117 [Source:MGI Symbol;Acc:MGI:2444580]	0.47024	-1.08853	0.00378879
Arfgef3	ARFGEF family member 3 [Source:MGI Symbol;Acc:MGI:106387]	0.4684	-1.09419	0.000341597
Slc2a6	solute carrier family 2 (facilitated glucose transporter), member 6 [Source:MGI Symbol;Acc:MGI:2443286]	0.467044	-1.09837	0.0303967
Aldh1a3	aldehyde dehydrogenase family 1, subfamily A3 [Source:MGI Symbol;Acc:MGI:1861722]	0.466158	-1.10111	0.0075094
Ndfip2	Nedd4 family interacting protein 2 [Source:MGI Symbol;Acc:MGI:1923523]	0.465138	-1.10427	2.23838e-07
Adamts17	a disintegrin-like and metallopeptidase (reprolysin type) with thrombospondin type 1 motif, 17 [Source:MGI Symbol;Acc:MGI:3588195]	0.465016	-1.10465	0.0313139
Tmprss5	transmembrane protease, serine 5 (spinesin) [Source:MGI Symbol;Acc:MGI:1933407]	0.4642	-1.10718	0.0280498
Cfap47	cilia and flagella associated protein 47 [Source:MGI Symbol;Acc:MGI:3781475]	0.462241	-1.11328	0.0343674
Prkcq	protein kinase C, theta [Source:MGI Symbol;Acc:MGI:97601]	0.462029	-1.11395	4.70447e-06
Fez1	fasciculation and elongation protein zeta 1 (zygin I) [Source:MGI Symbol;Acc:MGI:2670976]	0.461323	-1.11615	5.48359e-06
Bfsp2	beaded filament structural protein 2, phakinin [Source:MGI Symbol;Acc:MGI:1333828]	0.460835	-1.11768	0.0164981
Lrrc75b	leucine rich repeat containing 75B [Source:MGI Symbol;Acc:MGI:2143657]	0.460052	-1.12013	0.043098
Gjc3	gap junction protein, gamma 3 [Source:MGI Symbol;Acc:MGI:2153041]	0.46002	-1.12023	0.00128568
Gm5637	predicted pseudogene 5637 [Source:MGI Symbol;Acc:MGI:3648120]	0.459903	-1.1206	0.0405827
Ly6g6d	lymphocyte antigen 6 complex, locus G6D [Source:MGI Symbol;Acc:MGI:2148931]	0.4599	-1.12061	0.00505065
C130071C03Rik	RIKEN cDNA C130071C03 gene [Source:MGI Symbol;Acc:MGI:2443574]	0.459208	-1.12278	0.024622
Pcyt1b	phosphate cytidylyltransferase 1, choline, beta isoform [Source:MGI Symbol;Acc:MGI:2147987]	0.458037	-1.12647	0.00190456
Crygs	crystallin, gamma S [Source:MGI Symbol;Acc:MGI:1298216]	0.457333	-1.12868	0.0422367
Gm9403	predicted gene 9403 [Source:MGI Symbol;Acc:MGI:3648825]	0.454906	-1.13636	0.0288209
Cyp7b1	cytochrome P450, family 7, subfamily b, polypeptide 1 [Source:MGI Symbol;Acc:MGI:104978]	0.454813	-1.13666	1.69819e-06
B630019K06Rik	RIKEN cDNA B630019K06 gene [Source:MGI Symbol;Acc:MGI:2147918]	0.45426	-1.13841	0.0400201
Pmvk	phosphomevalonate kinase [Source:MGI Symbol;Acc:MGI:1915853]	0.454001	-1.13923	2.66865e-12
Itga2	integrin alpha 2 [Source:MGI Symbol;Acc:MGI:96600]	0.453916	-1.1395	0.000278975
Dok6	docking protein 6 [Source:MGI Symbol;Acc:MGI:3639495]	0.453914	-1.13951	0.0397669
Mmp16	matrix metallopeptidase 16 [Source:MGI Symbol;Acc:MGI:1276107]	0.453487	-1.14087	0.0406701
Rab39b	RAB39B, member RAS oncogene family [Source:MGI Symbol;Acc:MGI:1915040]	0.453452	-1.14098	0.00289835
Lcat	lecithin cholesterol acyltransferase [Source:MGI Symbol;Acc:MGI:96755]	0.453348	-1.14131	0.0351972
Acat2	acetyl-Coenzyme A acetyltransferase 2 [Source:MGI Symbol;Acc:MGI:87871]	0.452517	-1.14395	1.33088e-05
Sema5a	sema domain, seven thrombospondin repeats (type 1 and type 1-like), transmembrane domain (TM) and short cytoplasmic domain, (semaphorin) 5A [Source:MGI Symbol;Acc:MGI:107556]	0.451057	-1.14862	0.00433332
Papolb	poly (A) polymerase beta (testis specific) [Source:MGI Symbol;Acc:MGI:1932115]	0.450752	-1.14959	0.0313998
Dhcr7	7-dehydrocholesterol reductase [Source:MGI Symbol;Acc:MGI:1298378]	0.45021	-1.15133	1.4572e-05
Gpr37l1	G protein-coupled receptor 37-like 1 [Source:MGI Symbol;Acc:MGI:1928503]	0.449262	-1.15437	0.00296879
Slitrk1	SLIT and NTRK-like family, member 1 [Source:MGI Symbol;Acc:MGI:2679446]	0.448956	-1.15535	0.0485091
Gm8378	predicted gene 8378 [Source:MGI Symbol;Acc:MGI:3646777]	0.445634	-1.16607	0.0493811
Rtkn	rhotekin [Source:MGI Symbol;Acc:MGI:107371]	0.444255	-1.17054	0.0151245
Gm44164	predicted gene, 44164 [Source:MGI Symbol;Acc:MGI:5690556]	0.443592	-1.17269	0.0319279
Gm20939	predicted gene, 20939 [Source:MGI Symbol;Acc:MGI:5434295]	0.442654	-1.17575	0.00548445
Sbspon	somatomedin B and thrombospondin, type 1 domain containing [Source:MGI Symbol;Acc:MGI:2684952]	0.441875	-1.17829	0.000487035
Mlip	muscular LMNA-interacting protein [Source:MGI Symbol;Acc:MGI:1916892]	0.441657	-1.179	0.000951479
Crym	crystallin, mu [Source:MGI Symbol;Acc:MGI:102675]	0.441651	-1.17902	0.0407213
Gm42788	predicted gene 42788 [Source:MGI Symbol;Acc:MGI:5662925]	0.441633	-1.17908	0.000259178
Col11a1	collagen, type XI, alpha 1 [Source:MGI Symbol;Acc:MGI:88446]	0.441029	-1.18105	0.00221098
Arg1	arginase, liver [Source:MGI Symbol;Acc:MGI:88070]	0.440009	-1.18439	0.0229944
Adcy1	adenylate cyclase 1 [Source:MGI Symbol;Acc:MGI:99677]	0.436567	-1.19573	0.0494799
Cd9	CD9 antigen [Source:MGI Symbol;Acc:MGI:88348]	0.436473	-1.19604	5.32839e-07
Tmem121	transmembrane protein 121 [Source:MGI Symbol;Acc:MGI:1916445]	0.436181	-1.197	0.0126133
5330439K02Rik	RIKEN cDNA 5330439K02 gene [Source:MGI Symbol;Acc:MGI:1925532]	0.436113	-1.19723	0.0258176
Mirg	miRNA containing gene [Source:MGI Symbol;Acc:MGI:3781106]	0.43532	-1.19985	0.00680772
Crybb1	crystallin, beta B1 [Source:MGI Symbol;Acc:MGI:104992]	0.43507	-1.20068	0.0220194
Map6d1	MAP6 domain containing 1 [Source:MGI Symbol;Acc:MGI:3607784]	0.434807	-1.20155	0.0479164
Gm13054	predicted gene 13054 [Source:MGI Symbol;Acc:MGI:3702728]	0.434795	-1.20159	0.0386468
Cltrn	collectrin, amino acid transport regulator [Source:MGI Symbol;Acc:MGI:1926234]	0.434685	-1.20196	0.0122094
1700113A16Rik	RIKEN cDNA 1700113A16 gene [Source:MGI Symbol;Acc:MGI:1923892]	0.433278	-1.20664	0.00280068
Gm12504	predicted pseudogene 12504 [Source:MGI Symbol;Acc:MGI:3651567]	0.432993	-1.20758	0.0134214
Nek11	NIMA (never in mitosis gene a)-related expressed kinase 11 [Source:MGI Symbol;Acc:MGI:2442276]	0.432476	-1.20931	0.0014076
B230206L02Rik	RIKEN cDNA B230206L02 gene [Source:MGI Symbol;Acc:MGI:1924598]	0.430101	-1.21725	0.00357665
Gm19935	predicted gene, 19935 [Source:MGI Symbol;Acc:MGI:5012120]	0.429856	-1.21808	0.014329
Elovl1	elongation of very long chain fatty acids (FEN1/Elo2, SUR4/Elo3, yeast)-like 1 [Source:MGI Symbol;Acc:MGI:1858959]	0.429142	-1.22047	2.16762e-06
Utp14b	UTP14B small subunit processome component [Source:MGI Symbol;Acc:MGI:2445092]	0.428582	-1.22236	9.82136e-11
Slc27a6	solute carrier family 27 (fatty acid transporter), member 6 [Source:MGI Symbol;Acc:MGI:3036230]	0.428533	-1.22252	0.000947877
Adamts20	a disintegrin-like and metallopeptidase (reprolysin type) with thrombospondin type 1 motif, 20 [Source:MGI Symbol;Acc:MGI:2660628]	0.427441	-1.2262	0.0140076
Gjb1	gap junction protein, beta 1 [Source:MGI Symbol;Acc:MGI:95719]	0.426335	-1.22994	0.00036982
Mag	myelin-associated glycoprotein [Source:MGI Symbol;Acc:MGI:96912]	0.426247	-1.23024	0.0113769
Itm2a	integral membrane protein 2A [Source:MGI Symbol;Acc:MGI:107706]	0.424896	-1.23482	9.09491e-10
Gm45447	predicted gene 45447 [Source:MGI Symbol;Acc:MGI:5791283]	0.424407	-1.23648	0.0174034
Ccdc74a	coiled-coil domain containing 74A [Source:MGI Symbol;Acc:MGI:1919565]	0.424155	-1.23734	0.00933471
Soga3	SOGA family member 3 [Source:MGI Symbol;Acc:MGI:1914662]	0.424115	-1.23747	0.0323466
Gm10478	predicted gene 10478 [Source:MGI Symbol;Acc:MGI:3714531]	0.42398	-1.23793	0.0061559
Inka2	inka box actin regulator 2 [Source:MGI Symbol;Acc:MGI:1923497]	0.422696	-1.24231	1.28012e-05
Cd9-ps	Cd9 antigen, pseudogene [Source:MGI Symbol;Acc:MGI:3645134]	0.421961	-1.24482	0.0082462
St8sia5	ST8 alpha-N-acetyl-neuraminide alpha-2,8-sialyltransferase 5 [Source:MGI Symbol;Acc:MGI:109243]	0.421307	-1.24706	0.00784003
Fgf16	fibroblast growth factor 16 [Source:MGI Symbol;Acc:MGI:1931627]	0.417764	-1.25924	0.0459763
Ctnnal1	catenin (cadherin associated protein), alpha-like 1 [Source:MGI Symbol;Acc:MGI:1859649]	0.417085	-1.26159	0.000111512
Bean1	brain expressed, associated with Nedd4, 1 [Source:MGI Symbol;Acc:MGI:1929597]	0.41684	-1.26244	0.0362073
Nfe2	nuclear factor, erythroid derived 2 [Source:MGI Symbol;Acc:MGI:97308]	0.416534	-1.26349	0.0376575
Rnf128	ring finger protein 128 [Source:MGI Symbol;Acc:MGI:1914139]	0.414998	-1.26882	0.00423166
Dusp18	dual specificity phosphatase 18 [Source:MGI Symbol;Acc:MGI:1922469]	0.413651	-1.27351	1.435e-06
Zswim5	zinc finger SWIM-type containing 5 [Source:MGI Symbol;Acc:MGI:1921714]	0.412527	-1.27744	0.0370592
Rdh11	retinol dehydrogenase 11 [Source:MGI Symbol;Acc:MGI:102581]	0.412441	-1.27774	2.86065e-20
Pllp	plasma membrane proteolipid [Source:MGI Symbol;Acc:MGI:1915051]	0.411051	-1.28261	0.00687711
Tesk2	testis-specific kinase 2 [Source:MGI Symbol;Acc:MGI:2385204]	0.410982	-1.28285	0.000341415
Nrk	Nik related kinase [Source:MGI Symbol;Acc:MGI:1351326]	0.409921	-1.28658	0.00182004
Hipk4	homeodomain interacting protein kinase 4 [Source:MGI Symbol;Acc:MGI:2685008]	0.406529	-1.29857	0.0313748
Dusp14	dual specificity phosphatase 14 [Source:MGI Symbol;Acc:MGI:1927168]	0.405458	-1.30238	0.00012109
Mt3	metallothionein 3 [Source:MGI Symbol;Acc:MGI:97173]	0.404541	-1.30564	0.00198289
Gal3st1	galactose-3-O-sulfotransferase 1 [Source:MGI Symbol;Acc:MGI:1858277]	0.402563	-1.31271	0.00781243
Emp2	epithelial membrane protein 2 [Source:MGI Symbol;Acc:MGI:1098726]	0.402108	-1.31434	5.40085e-07
Kcnk1	potassium channel, subfamily K, member 1 [Source:MGI Symbol;Acc:MGI:109322]	0.401087	-1.31801	0.00145895
Faah	fatty acid amide hydrolase [Source:MGI Symbol;Acc:MGI:109609]	0.398815	-1.32621	0.00285597
Lox	lysyl oxidase [Source:MGI Symbol;Acc:MGI:96817]	0.398323	-1.32799	0.00886157
Fndc5	fibronectin type III domain containing 5 [Source:MGI Symbol;Acc:MGI:1917614]	0.398247	-1.32826	3.9803e-06
Cldn19	claudin 19 [Source:MGI Symbol;Acc:MGI:3033992]	0.397216	-1.332	0.00901837
	proteasome (prosome, macropain) subunit, alpha type 6 (Psma6) pseudogene	0.397167	-1.33218	0.0214853
Rian	RNA imprinted and accumulated in nucleus [Source:MGI Symbol;Acc:MGI:1922995]	0.397076	-1.33251	4.32727e-07
Tmem74	transmembrane protein 74 [Source:MGI Symbol;Acc:MGI:2443417]	0.395993	-1.33645	0.0136779
Nsdhl	NAD(P) dependent steroid dehydrogenase-like [Source:MGI Symbol;Acc:MGI:1099438]	0.395839	-1.33701	3.8005e-09
Lrrc8e	leucine rich repeat containing 8 family, member E [Source:MGI Symbol;Acc:MGI:1919517]	0.395337	-1.33885	0.000536499
Mboat1	membrane bound O-acyltransferase domain containing 1 [Source:MGI Symbol;Acc:MGI:2387184]	0.394509	-1.34187	8.29748e-05
Prrg3	proline rich Gla (G-carboxyglutamic acid) 3 (transmembrane) [Source:MGI Symbol;Acc:MGI:2685214]	0.394479	-1.34198	2.79219e-06
Cthrc1	collagen triple helix repeat containing 1 [Source:MGI Symbol;Acc:MGI:1915838]	0.393625	-1.34511	0.000157321
Tnfrsf25	tumor necrosis factor receptor superfamily, member 25 [Source:MGI Symbol;Acc:MGI:1934667]	0.392208	-1.35031	0.00905183
Cgref1	cell growth regulator with EF hand domain 1 [Source:MGI Symbol;Acc:MGI:1915817]	0.391925	-1.35135	1.47202e-07
6330403K07Rik	RIKEN cDNA 6330403K07 gene [Source:MGI Symbol;Acc:MGI:1918001]	0.391626	-1.35245	0.0265481
Vat1l	vesicle amine transport protein 1 like [Source:MGI Symbol;Acc:MGI:2142534]	0.390086	-1.35814	0.00145895
Fads2	fatty acid desaturase 2 [Source:MGI Symbol;Acc:MGI:1930079]	0.389952	-1.35863	2.67874e-07
Diaph3	diaphanous related formin 3 [Source:MGI Symbol;Acc:MGI:1927222]	0.389059	-1.36194	3.46302e-12
Gm37474	predicted gene, 37474 [Source:MGI Symbol;Acc:MGI:5610702]	0.388788	-1.36295	0.0415154
B4galnt3	beta-1,4-N-acetyl-galactosaminyl transferase 3 [Source:MGI Symbol;Acc:MGI:3041155]	0.388406	-1.36436	0.0202797
Gm43423	predicted gene 43423 [Source:MGI Symbol;Acc:MGI:5663560]	0.388068	-1.36562	0.0318921
Ciart	circadian associated repressor of transcription [Source:MGI Symbol;Acc:MGI:2684975]	0.387199	-1.36885	0.0223952
NA	NA	0.385851	-1.37388	0.00216012
Meg3	maternally expressed 3 [Source:MGI Symbol;Acc:MGI:1202886]	0.384946	-1.37727	0.0014076
Pank1	pantothenate kinase 1 [Source:MGI Symbol;Acc:MGI:1922985]	0.383389	-1.38312	6.97513e-08
Mfsd2a	major facilitator superfamily domain containing 2A [Source:MGI Symbol;Acc:MGI:1923824]	0.383208	-1.3838	0.00336086
Cdh20	cadherin 20 [Source:MGI Symbol;Acc:MGI:1346069]	0.382846	-1.38516	0.0361514
Lrrtm2	leucine rich repeat transmembrane neuronal 2 [Source:MGI Symbol;Acc:MGI:2389174]	0.382745	-1.38554	0.000852328
Gm37452	predicted gene, 37452 [Source:MGI Symbol;Acc:MGI:5610680]	0.379527	-1.39772	0.0478902
Shcbp1l	Shc SH2-domain binding protein 1-like [Source:MGI Symbol;Acc:MGI:1919086]	0.378474	-1.40173	0.0354739
Sc5d	sterol-C5-desaturase [Source:MGI Symbol;Acc:MGI:1353611]	0.37752	-1.40538	2.52301e-16
Mbp	myelin basic protein [Source:MGI Symbol;Acc:MGI:96925]	0.377165	-1.40673	0.00037318
Stard4	StAR-related lipid transfer (START) domain containing 4 [Source:MGI Symbol;Acc:MGI:2156764]	0.37541	-1.41346	9.98268e-23
Aacs	acetoacetyl-CoA synthetase [Source:MGI Symbol;Acc:MGI:1926144]	0.371841	-1.42724	2.65734e-11
4933408N05Rik	RIKEN cDNA 4933408N05 gene [Source:MGI Symbol;Acc:MGI:1918372]	0.371495	-1.42859	0.0468566
Elovl7	ELOVL family member 7, elongation of long chain fatty acids (yeast) [Source:MGI Symbol;Acc:MGI:1921809]	0.371442	-1.42879	0.000357262
Gm19744	predicted gene, 19744 [Source:MGI Symbol;Acc:MGI:5011929]	0.371214	-1.42968	0.00290598
Yjefn3	YjeF N-terminal domain containing 3 [Source:MGI Symbol;Acc:MGI:2681845]	0.37092	-1.43082	0.0248546
Gm32352	predicted gene, 32352 [Source:MGI Symbol;Acc:MGI:5591511]	0.370828	-1.43118	0.0435199
Snap91	synaptosomal-associated protein 91 [Source:MGI Symbol;Acc:MGI:109132]	0.369136	-1.43778	0.00365239
Spon2	spondin 2, extracellular matrix protein [Source:MGI Symbol;Acc:MGI:1923724]	0.368384	-1.44072	0.000144789
Crabp1	cellular retinoic acid binding protein I [Source:MGI Symbol;Acc:MGI:88490]	0.368363	-1.4408	0.0210413
Gm43627	predicted gene 43627 [Source:MGI Symbol;Acc:MGI:5663764]	0.36624	-1.44914	0.0276053
Gm42970	predicted gene 42970 [Source:MGI Symbol;Acc:MGI:5663107]	0.366165	-1.44943	0.032627
Gm36944	predicted gene, 36944 [Source:MGI Symbol;Acc:MGI:5610172]	0.363534	-1.45984	0.0294753
9630010A21Rik	RIKEN cDNA 9630010A21 gene [Source:MGI Symbol;Acc:MGI:2442787]	0.363416	-1.46031	0.035847
Egfl8	EGF-like domain 8 [Source:MGI Symbol;Acc:MGI:1932094]	0.362241	-1.46498	4.52922e-07
Gm47445	predicted gene, 47445 [Source:MGI Symbol;Acc:MGI:6096399]	0.360351	-1.47252	0.0147159
Cfap70	cilia and flagella associated protein 70 [Source:MGI Symbol;Acc:MGI:1923920]	0.360198	-1.47314	0.0070753
1500009C09Rik	RIKEN cDNA 1500009C09 gene [Source:MGI Symbol;Acc:MGI:1923755]	0.358858	-1.47851	0.014159
Fbn2	fibrillin 2 [Source:MGI Symbol;Acc:MGI:95490]	0.358791	-1.47878	0.000302316
Dynlt1a	dynein light chain Tctex-type 1A [Source:MGI Symbol;Acc:MGI:3807506]	0.358699	-1.47915	8.10567e-06
Ttc25	tetratricopeptide repeat domain 25 [Source:MGI Symbol;Acc:MGI:1921657]	0.358473	-1.48006	0.0275101
Gas2l3	growth arrest-specific 2 like 3 [Source:MGI Symbol;Acc:MGI:1918780]	0.357971	-1.48209	2.005e-05
Dhrs2	dehydrogenase/reductase member 2 [Source:MGI Symbol;Acc:MGI:1918662]	0.356749	-1.48702	0.000318447
Tmem189	transmembrane protein 189 [Source:MGI Symbol;Acc:MGI:2142624]	0.356737	-1.48707	4.0615e-05
Dmc1	DNA meiotic recombinase 1 [Source:MGI Symbol;Acc:MGI:105393]	0.356088	-1.48969	0.00261696
3110045C21Rik	RIKEN cDNA 3110045C21 gene [Source:MGI Symbol;Acc:MGI:1914553]	0.353343	-1.50086	0.00206226
Gm31812	predicted gene, 31812 [Source:MGI Symbol;Acc:MGI:5590971]	0.352684	-1.50355	0.00523743
Myrfl	myelin regulatory factor-like [Source:MGI Symbol;Acc:MGI:2685085]	0.352678	-1.50358	0.00013085
Foxi2	forkhead box I2 [Source:MGI Symbol;Acc:MGI:3028075]	0.350986	-1.51052	0.0379434
D430036J16Rik	RIKEN cDNA D430036J16 gene [Source:MGI Symbol;Acc:MGI:2441977]	0.348776	-1.51963	0.00691743
Adgb	androglobin [Source:MGI Symbol;Acc:MGI:3605549]	0.348759	-1.5197	0.000505501
Cmtm5	CKLF-like MARVEL transmembrane domain containing 5 [Source:MGI Symbol;Acc:MGI:2447164]	0.346894	-1.52743	0.00116442
Bdh1	3-hydroxybutyrate dehydrogenase, type 1 [Source:MGI Symbol;Acc:MGI:1919161]	0.346286	-1.52997	3.54287e-06
Epha5	Eph receptor A5 [Source:MGI Symbol;Acc:MGI:99654]	0.346266	-1.53005	0.00064267
Mal	myelin and lymphocyte protein, T cell differentiation protein [Source:MGI Symbol;Acc:MGI:892970]	0.344935	-1.5356	4.30379e-05
Gm15728	predicted gene 15728 [Source:MGI Symbol;Acc:MGI:3783171]	0.344471	-1.53755	0.0383159
A330069K06Rik	RIKEN cDNA A330069K06 gene [Source:MGI Symbol;Acc:MGI:2685464]	0.343337	-1.5423	7.8574e-05
Sh3gl3	SH3-domain GRB2-like 3 [Source:MGI Symbol;Acc:MGI:700011]	0.343231	-1.54275	1.02869e-10
Col7a1	collagen, type VII, alpha 1 [Source:MGI Symbol;Acc:MGI:88462]	0.341875	-1.54846	0.0225219
Fam178b	family with sequence similarity 178, member B [Source:MGI Symbol;Acc:MGI:3026913]	0.341808	-1.54874	0.00925528
Adamdec1	ADAM-like, decysin 1 [Source:MGI Symbol;Acc:MGI:1917650]	0.341693	-1.54923	0.0388178
Chst2	carbohydrate sulfotransferase 2 [Source:MGI Symbol;Acc:MGI:1891160]	0.341217	-1.55124	0.0172118
Ccn4	cellular communication network factor 4 [Source:MGI Symbol;Acc:MGI:1197008]	0.337745	-1.56599	6.15851e-06
Acsl3	acyl-CoA synthetase long-chain family member 3 [Source:MGI Symbol;Acc:MGI:1921455]	0.336676	-1.57057	3.17985e-15
Ildr1	immunoglobulin-like domain containing receptor 1 [Source:MGI Symbol;Acc:MGI:2146574]	0.33608	-1.57312	0.00513771
Dnali1	dynein, axonemal, light intermediate polypeptide 1 [Source:MGI Symbol;Acc:MGI:1922813]	0.335999	-1.57347	0.00821054
Ldlr	low density lipoprotein receptor [Source:MGI Symbol;Acc:MGI:96765]	0.334711	-1.57901	0.000231745
Fam107a	family with sequence similarity 107, member A [Source:MGI Symbol;Acc:MGI:3041256]	0.333964	-1.58223	0.000171366
Pcyt2	phosphate cytidylyltransferase 2, ethanolamine [Source:MGI Symbol;Acc:MGI:1915921]	0.332756	-1.58746	3.54687e-12
Bmerb1	bMERB domain containing 1 [Source:MGI Symbol;Acc:MGI:1914504]	0.33223	-1.58975	0.0326229
Tmem179	transmembrane protein 179 [Source:MGI Symbol;Acc:MGI:2144891]	0.331886	-1.59124	0.0028437
Gm4468	predicted gene 4468 [Source:MGI Symbol;Acc:MGI:3782652]	0.331166	-1.59438	0.0417781
Ly6g6f	lymphocyte antigen 6 complex, locus G6F [Source:MGI Symbol;Acc:MGI:3616082]	0.330063	-1.59919	0.00270463
Cnih3	cornichon family AMPA receptor auxiliary protein 3 [Source:MGI Symbol;Acc:MGI:1920228]	0.329715	-1.60071	0.0205873
Hsd17b7	hydroxysteroid (17-beta) dehydrogenase 7 [Source:MGI Symbol;Acc:MGI:1330808]	0.328501	-1.60603	2.86065e-20
Gm43322	predicted gene 43322 [Source:MGI Symbol;Acc:MGI:5663459]	0.328349	-1.6067	0.0173356
Serpind1	serine (or cysteine) peptidase inhibitor, clade D, member 1 [Source:MGI Symbol;Acc:MGI:96051]	0.326889	-1.61313	0.0029491
Cspg5	chondroitin sulfate proteoglycan 5 [Source:MGI Symbol;Acc:MGI:1352747]	0.326751	-1.61374	0.000280026
E030026E10Rik	RIKEN cDNA E030026E10 gene [Source:MGI Symbol;Acc:MGI:2444788]	0.323718	-1.62719	0.0329603
Gm11295	predicted gene 11295 [Source:MGI Symbol;Acc:MGI:3651595]	0.321907	-1.63528	0.0175181
Frrs1l	ferric-chelate reductase 1 like [Source:MGI Symbol;Acc:MGI:2442704]	0.32038	-1.64215	0.00704388
Atp10b	ATPase, class V, type 10B [Source:MGI Symbol;Acc:MGI:2442688]	0.320113	-1.64335	0.00057606
Lrrtm3	leucine rich repeat transmembrane neuronal 3 [Source:MGI Symbol;Acc:MGI:2389177]	0.319072	-1.64805	1.57028e-05
Elovl4	elongation of very long chain fatty acids (FEN1/Elo2, SUR4/Elo3, yeast)-like 4 [Source:MGI Symbol;Acc:MGI:1933331]	0.317288	-1.65614	0.000109617
Piwil1	piwi-like RNA-mediated gene silencing 1 [Source:MGI Symbol;Acc:MGI:1928897]	0.310862	-1.68565	0.0280424
Krt28	keratin 28 [Source:MGI Symbol;Acc:MGI:1918093]	0.308546	-1.69644	0.00895978
	novel transcript	0.308071	-1.69867	0.00258367
Dab1	disabled 1 [Source:MGI Symbol;Acc:MGI:108554]	0.307333	-1.70213	0.0244785
Pgbd5	piggyBac transposable element derived 5 [Source:MGI Symbol;Acc:MGI:2429955]	0.304921	-1.71349	0.0065664
Cyp4f14	cytochrome P450, family 4, subfamily f, polypeptide 14 [Source:MGI Symbol;Acc:MGI:1927669]	0.303631	-1.71961	0.00922197
Lrtm2	leucine-rich repeats and transmembrane domains 2 [Source:MGI Symbol;Acc:MGI:2141485]	0.30295	-1.72285	0.00337662
Gm1992	predicted gene 1992 [Source:MGI Symbol;Acc:MGI:3780162]	0.302655	-1.72426	0.0400087
Gjb6	gap junction protein, beta 6 [Source:MGI Symbol;Acc:MGI:107588]	0.299178	-1.74092	0.014936
9130024F11Rik	RIKEN cDNA 9130024F11 gene [Source:MGI Symbol;Acc:MGI:1926150]	0.298992	-1.74182	0.00137152
Srsf12	serine/arginine-rich splicing factor 12 [Source:MGI Symbol;Acc:MGI:2661424]	0.29757	-1.7487	0.0198939
NA	NA	0.297443	-1.74931	0.00119445
Gm12530	predicted gene 12530 [Source:MGI Symbol;Acc:MGI:3651546]	0.295354	-1.75949	8.01842e-05
Gpr37	G protein-coupled receptor 37 [Source:MGI Symbol;Acc:MGI:1313297]	0.294065	-1.7658	0.0139848
Rundc3a	RUN domain containing 3A [Source:MGI Symbol;Acc:MGI:1858752]	0.293157	-1.77025	7.42141e-05
Cdrt4os1	CMT1A duplicated region transcript 4, opposite strand 1 [Source:MGI Symbol;Acc:MGI:1922134]	0.291874	-1.77658	0.0252047
Ermap	erythroblast membrane-associated protein [Source:MGI Symbol;Acc:MGI:1349816]	0.289472	-1.78851	0.0173471
Hmgcs1	3-hydroxy-3-methylglutaryl-Coenzyme A synthase 1 [Source:MGI Symbol;Acc:MGI:107592]	0.289422	-1.78875	7.11128e-14
Ucn2	urocortin 2 [Source:MGI Symbol;Acc:MGI:2176375]	0.285673	-1.80756	0.0416507
Ndst4	N-deacetylase/N-sulfotransferase (heparin glucosaminyl) 4 [Source:MGI Symbol;Acc:MGI:1932545]	0.285653	-1.80766	0.0378538
Slc15a2	solute carrier family 15 (H+/peptide transporter), member 2 [Source:MGI Symbol;Acc:MGI:1890457]	0.285513	-1.80837	0.00162955
Gm13166	predicted gene 13166 [Source:MGI Symbol;Acc:MGI:3705130]	0.283565	-1.81825	0.0388263
Gm43813	predicted gene 43813 [Source:MGI Symbol;Acc:MGI:5663950]	0.282687	-1.82272	0.0282846
Col28a1	collagen, type XXVIII, alpha 1 [Source:MGI Symbol;Acc:MGI:2685312]	0.28219	-1.82526	6.14291e-10
Them5	thioesterase superfamily member 5 [Source:MGI Symbol;Acc:MGI:1913448]	0.280557	-1.83363	0.00983483
Fa2h	fatty acid 2-hydroxylase [Source:MGI Symbol;Acc:MGI:2443327]	0.278325	-1.84516	0.0286557
Col9a1	collagen, type IX, alpha 1 [Source:MGI Symbol;Acc:MGI:88465]	0.274232	-1.86653	0.0444565
Slc26a1	solute carrier family 26 (sulfate transporter), member 1 [Source:MGI Symbol;Acc:MGI:2385894]	0.272411	-1.87614	0.00378879
2210011C24Rik	RIKEN cDNA 2210011C24 gene [Source:MGI Symbol;Acc:MGI:1917384]	0.270165	-1.88809	0.00386974
Gm14808	predicted gene 14808 [Source:MGI Symbol;Acc:MGI:3705252]	0.269326	-1.89258	0.00187769
Lss	lanosterol synthase [Source:MGI Symbol;Acc:MGI:1336155]	0.265828	-1.91143	2.52301e-16
Srd5a1	steroid 5 alpha-reductase 1 [Source:MGI Symbol;Acc:MGI:98400]	0.256247	-1.96439	6.8697e-09
1110015O18Rik	RIKEN cDNA 1110015O18 gene [Source:MGI Symbol;Acc:MGI:1915766]	0.255146	-1.9706	0.000613794
Radx	RPA1 related single stranded DNA binding protein, X-linked [Source:MGI Symbol;Acc:MGI:2147848]	0.253782	-1.97834	2.85957e-05
Cntn1	contactin 1 [Source:MGI Symbol;Acc:MGI:105980]	0.250403	-1.99767	2.58688e-05
Pcdh8	protocadherin 8 [Source:MGI Symbol;Acc:MGI:1306800]	0.245492	-2.02625	0.027284
Sqle	squalene epoxidase [Source:MGI Symbol;Acc:MGI:109296]	0.244323	-2.03314	5.6271e-21
Calcoco2	calcium binding and coiled-coil domain 2 [Source:MGI Symbol;Acc:MGI:1343177]	0.242994	-2.04101	0.00897683
Elovl6	ELOVL family member 6, elongation of long chain fatty acids (yeast) [Source:MGI Symbol;Acc:MGI:2156528]	0.241832	-2.04792	2.5815e-10
Syt4	synaptotagmin IV [Source:MGI Symbol;Acc:MGI:101759]	0.240952	-2.05318	3.19695e-11
Cdrt4os2	CMT1A duplicated region transcript 4, opposite strand 2 [Source:MGI Symbol;Acc:MGI:3705321]	0.239889	-2.05956	0.010975
Fam57a	family with sequence similarity 57, member A [Source:MGI Symbol;Acc:MGI:2151840]	0.238363	-2.06877	8.91365e-08
Kcnh8	potassium voltage-gated channel, subfamily H (eag-related), member 8 [Source:MGI Symbol;Acc:MGI:2445160]	0.237814	-2.0721	0.000419865
Slc22a22	solute carrier family 22 (organic cation transporter), member 22 [Source:MGI Symbol;Acc:MGI:2446114]	0.23692	-2.07753	0.0037008
Scn3b	sodium channel, voltage-gated, type III, beta [Source:MGI Symbol;Acc:MGI:1918882]	0.231403	-2.11152	1.77545e-10
Mpz	myelin protein zero [Source:MGI Symbol;Acc:MGI:103177]	0.229876	-2.12107	0.000834222
Pmp22	peripheral myelin protein 22 [Source:MGI Symbol;Acc:MGI:97631]	0.229864	-2.12115	5.36158e-08
Fdft1	farnesyl diphosphate farnesyl transferase 1 [Source:MGI Symbol;Acc:MGI:102706]	0.229756	-2.12182	8.66949e-32
Aldoc	aldolase C, fructose-bisphosphate [Source:MGI Symbol;Acc:MGI:101863]	0.225212	-2.15065	0.000117936
Cnmd	chondromodulin [Source:MGI Symbol;Acc:MGI:1341171]	0.222662	-2.16707	7.38597e-08
Dbil5	diazepam binding inhibitor-like 5 [Source:MGI Symbol;Acc:MGI:108039]	0.221478	-2.17476	0.00173663
Msmo1	methylsterol monoxygenase 1 [Source:MGI Symbol;Acc:MGI:1913484]	0.219541	-2.18744	3.74854e-26
Ugt8a	UDP galactosyltransferase 8A [Source:MGI Symbol;Acc:MGI:109522]	0.21559	-2.21364	2.96167e-07
Pmp2	peripheral myelin protein 2 [Source:MGI Symbol;Acc:MGI:102667]	0.211219	-2.24319	3.15574e-12
Gm19445	predicted gene, 19445 [Source:MGI Symbol;Acc:MGI:5011630]	0.207988	-2.26542	0.0126348
Fdps	farnesyl diphosphate synthetase [Source:MGI Symbol;Acc:MGI:104888]	0.205724	-2.28122	8.43526e-18
Dhcr24	24-dehydrocholesterol reductase [Source:MGI Symbol;Acc:MGI:1922004]	0.205025	-2.28613	1.30883e-07
Mvd	mevalonate (diphospho) decarboxylase [Source:MGI Symbol;Acc:MGI:2179327]	0.204774	-2.28789	3.06016e-10
Col26a1	collagen, type XXVI, alpha 1 [Source:MGI Symbol;Acc:MGI:2155345]	0.204364	-2.29078	0.000126737
Cyp51	cytochrome P450, family 51 [Source:MGI Symbol;Acc:MGI:106040]	0.203135	-2.29949	3.10374e-38
Tmsb15b2	thymosin beta 15b2 [Source:MGI Symbol;Acc:MGI:3843061]	0.201304	-2.31256	0.00456173
Scg5	secretogranin V [Source:MGI Symbol;Acc:MGI:98289]	0.200212	-2.3204	1.48316e-06
Idi1	isopentenyl-diphosphate delta isomerase [Source:MGI Symbol;Acc:MGI:2442264]	0.200058	-2.32151	8.21231e-17
Tm7sf2	transmembrane 7 superfamily member 2 [Source:MGI Symbol;Acc:MGI:1920416]	0.196632	-2.34643	7.65665e-10
Gm35940	predicted gene, 35940 [Source:MGI Symbol;Acc:MGI:5595099]	0.195506	-2.35471	0.0340037
Hapln2	hyaluronan and proteoglycan link protein 2 [Source:MGI Symbol;Acc:MGI:2137300]	0.192483	-2.3772	0.0101889
Car10	carbonic anhydrase 10 [Source:MGI Symbol;Acc:MGI:1919855]	0.186543	-2.42242	0.000286788
Insyn2a	inhibitory synaptic factor 2A [Source:MGI Symbol;Acc:MGI:3605068]	0.179705	-2.47629	0.00435751
Hmga2	high mobility group AT-hook 2 [Source:MGI Symbol;Acc:MGI:101761]	0.172676	-2.53386	1.31473e-05
Tmprss7	transmembrane serine protease 7 [Source:MGI Symbol;Acc:MGI:2686594]	0.172045	-2.53915	0.00080647
Cyp2j13	cytochrome P450, family 2, subfamily j, polypeptide 13 [Source:MGI Symbol;Acc:MGI:2385197]	0.170871	-2.54902	0.00237839
Epb42	erythrocyte membrane protein band 4.2 [Source:MGI Symbol;Acc:MGI:95402]	0.166733	-2.58439	0.0368034
Slco4c1	solute carrier organic anion transporter family, member 4C1 [Source:MGI Symbol;Acc:MGI:2442784]	0.159227	-2.65084	1.29191e-06
Hmgcr	3-hydroxy-3-methylglutaryl-Coenzyme A reductase [Source:MGI Symbol;Acc:MGI:96159]	0.149705	-2.73981	9.58953e-38
Panct2	pluripotency-associated noncoding transcript 2 [Source:MGI Symbol;Acc:MGI:3643517]	0.144417	-2.79169	3.66366e-12
Tekt5	tektin 5 [Source:MGI Symbol;Acc:MGI:1917676]	0.142632	-2.80963	0.00128241
Gm29811	predicted gene, 29811 [Source:MGI Symbol;Acc:MGI:5588970]	0.140917	-2.82709	2.7238e-09
Fam163a	family with sequence similarity 163, member A [Source:MGI Symbol;Acc:MGI:3618859]	0.140407	-2.83231	0.00489884
Rnf207	ring finger protein 207 [Source:MGI Symbol;Acc:MGI:2684989]	0.139059	-2.84623	0.000771743
Nrxn3	neurexin III [Source:MGI Symbol;Acc:MGI:1096389]	0.134867	-2.89039	5.52239e-05
Gm42875	predicted gene 42875 [Source:MGI Symbol;Acc:MGI:5663012]	0.125191	-2.9978	0.0153445
Ninj2	ninjurin 2 [Source:MGI Symbol;Acc:MGI:1352751]	0.117067	-3.0946	0.0382869
Ccer2	coiled-coil glutamate-rich protein 2 [Source:MGI Symbol;Acc:MGI:3645242]	0.106885	-3.22587	2.92881e-07
Adgrg7	adhesion G protein-coupled receptor G7 [Source:MGI Symbol;Acc:MGI:2441732]	0.105354	-3.24669	0.000159877
Gramd2	GRAM domain containing 2 [Source:MGI Symbol;Acc:MGI:3528937]	0.102	-3.29336	1.04661e-05
Gm10941	predicted gene 10941 [Source:MGI Symbol;Acc:MGI:3779151]	0.0963586	-3.37544	0.000467463
Il1f9	interleukin 1 family, member 9 [Source:MGI Symbol;Acc:MGI:2449929]	0.0763196	-3.7118	0.0109449
Mgam	maltase-glucoamylase [Source:MGI Symbol;Acc:MGI:1203495]	0.0697577	-3.8415	0.00041828
Mobp	myelin-associated oligodendrocytic basic protein [Source:MGI Symbol;Acc:MGI:108511]	0.0674545	-3.88994	0.00093804
Garem2	GRB2 associated regulator of MAPK1 subtype 2 [Source:MGI Symbol;Acc:MGI:2685290]	0.0671481	-3.89651	0.0438321
Mup22	major urinary protein 22 [Source:MGI Symbol;Acc:MGI:5434675]	0.0541879	-4.20589	0.0146278
Gm3571	predicted gene 3571 [Source:MGI Symbol;Acc:MGI:3781748]	0.0541469	-4.20698	4.13665e-05
Cplx3	complexin 3 [Source:MGI Symbol;Acc:MGI:2384571]	0.051497	-4.27937	0.0191648
Npy6r	neuropeptide Y receptor Y6 [Source:MGI Symbol;Acc:MGI:1098590]	0.0225906	-5.46814	3.97345e-06

## Sheet: B
(B) The 398 genes differentially expressed between 3 day cut nerves in aged and young WT mice (WT 3 day cut aged vs young)
Gene		Fold Change	log Fold Change	Adjusted p Value
Lipf	lipase, gastric [Source:MGI Symbol;Acc:MGI:1914967]	165.411	7.36991	0.00332524
Igkv14-126	immunoglobulin kappa variable 14-126 [Source:MGI Symbol;Acc:MGI:3643131]	150.535	7.23395	0.0120091
Gm36827	predicted gene, 36827 [Source:MGI Symbol;Acc:MGI:5595986]	84.5414	6.40159	0.000401892
Ighv11-2	immunoglobulin heavy variable V11-2 [Source:MGI Symbol;Acc:MGI:4947968]	72.5	6.17991	0.0488163
5033425B01Rik	RIKEN cDNA 5033425B01 gene [Source:MGI Symbol;Acc:MGI:1921983]	65.305	6.02912	1.38842e-06
Gsg1l	GSG1-like [Source:MGI Symbol;Acc:MGI:2685483]	63.5134	5.98899	0.00414998
1700047G03Rik	RIKEN cDNA 1700047G03 gene [Source:MGI Symbol;Acc:MGI:1920589]	51.085	5.67483	0.00174553
Prr32	proline rich 32 [Source:MGI Symbol;Acc:MGI:1916050]	43.4856	5.44247	4.38187e-05
Igha	immunoglobulin heavy constant alpha [Source:MGI Symbol;Acc:MGI:96444]	42.8116	5.41993	0.000869521
Slc5a7	solute carrier family 5 (choline transporter), member 7 [Source:MGI Symbol;Acc:MGI:1927126]	40.6143	5.34391	0.00652918
Tafa1	TAFA chemokine like family member 1 [Source:MGI Symbol;Acc:MGI:2443695]	28.0535	4.81011	0.00207533
A330094K24Rik	RIKEN cDNA A330094K24 gene [Source:MGI Symbol;Acc:MGI:1924343]	26.7616	4.74209	0.0382114
Gm7609	predicted pseudogene 7609 [Source:MGI Symbol;Acc:MGI:3644536]	22.5728	4.49651	0.00299089
Gm5627	predicted gene 5627 [Source:MGI Symbol;Acc:MGI:3645308]	18.8538	4.23678	0.00552488
Cxcl3	chemokine (C-X-C motif) ligand 3 [Source:MGI Symbol;Acc:MGI:3037818]	17.2695	4.11016	5.39771e-05
Igkc	immunoglobulin kappa constant [Source:MGI Symbol;Acc:MGI:96495]	16.151	4.01355	0.0439973
Lep	leptin [Source:MGI Symbol;Acc:MGI:104663]	15.6096	3.96436	0.0010053
Gm8162	predicted gene 8162 [Source:MGI Symbol;Acc:MGI:3644710]	15.1927	3.92531	0.000709208
Oxtr	oxytocin receptor [Source:MGI Symbol;Acc:MGI:109147]	14.6497	3.8728	0.00574104
Areg	amphiregulin [Source:MGI Symbol;Acc:MGI:88068]	14.2814	3.83606	0.000206319
Sez6l	seizure related 6 homolog like [Source:MGI Symbol;Acc:MGI:1935121]	14.1507	3.8228	6.61056e-06
Gm2619	predicted gene 2619 [Source:MGI Symbol;Acc:MGI:3780787]	13.4809	3.75284	0.00104941
Serpinb2	serine (or cysteine) peptidase inhibitor, clade B, member 2 [Source:MGI Symbol;Acc:MGI:97609]	12.7857	3.67646	1.59269e-09
Ankrd34c	ankyrin repeat domain 34C [Source:MGI Symbol;Acc:MGI:2685617]	12.418	3.63436	1.19157e-13
Gm12236	predicted gene 12236 [Source:MGI Symbol;Acc:MGI:3651548]	10.7377	3.42461	0.0358095
Etnppl	ethanolamine phosphate phospholyase [Source:MGI Symbol;Acc:MGI:1919010]	10.6226	3.40906	0.0213864
Gm9951	predicted gene 9951 [Source:MGI Symbol;Acc:MGI:3641827]	10.6036	3.40648	0.00140331
Trim67	tripartite motif-containing 67 [Source:MGI Symbol;Acc:MGI:3045323]	10.5211	3.39521	0.00674076
Kcnj14	potassium inwardly-rectifying channel, subfamily J, member 14 [Source:MGI Symbol;Acc:MGI:2384820]	10.4667	3.38773	0.0269225
Fam110c	family with sequence similarity 110, member C [Source:MGI Symbol;Acc:MGI:1918813]	10.4246	3.38192	0.00851781
Colec10	collectin sub-family member 10 [Source:MGI Symbol;Acc:MGI:3606482]	9.42621	3.23668	0.0426097
Vmn1r181	vomeronasal 1 receptor 181 [Source:MGI Symbol;Acc:MGI:3033489]	9.30121	3.21742	0.0246562
Gm44956	predicted gene 44956 [Source:MGI Symbol;Acc:MGI:5753532]	9.18226	3.19885	0.0304891
Cnga2	cyclic nucleotide gated channel alpha 2 [Source:MGI Symbol;Acc:MGI:108040]	9.0311	3.1749	0.0337583
Pla2g5	phospholipase A2, group V [Source:MGI Symbol;Acc:MGI:101899]	8.86348	3.14787	3.99279e-05
B930092H01Rik	RIKEN cDNA B930092H01 gene [Source:MGI Symbol;Acc:MGI:4437738]	8.79989	3.13749	0.0477103
Il11	interleukin 11 [Source:MGI Symbol;Acc:MGI:107613]	8.78466	3.13499	6.25304e-17
Them5	thioesterase superfamily member 5 [Source:MGI Symbol;Acc:MGI:1913448]	8.61659	3.10712	0.000110094
Sucnr1	succinate receptor 1 [Source:MGI Symbol;Acc:MGI:1934135]	7.99009	2.99821	7.94194e-08
Gm42793	predicted gene 42793 [Source:MGI Symbol;Acc:MGI:5662930]	7.54829	2.91615	1.38842e-06
Ereg	epiregulin [Source:MGI Symbol;Acc:MGI:107508]	7.53431	2.91348	1.25767e-07
Mmp10	matrix metallopeptidase 10 [Source:MGI Symbol;Acc:MGI:97007]	7.51298	2.90939	0.00936318
Otop1	otopetrin 1 [Source:MGI Symbol;Acc:MGI:2388363]	7.45745	2.89868	2.68157e-08
Nnat	neuronatin [Source:MGI Symbol;Acc:MGI:104716]	7.13643	2.8352	1.13402e-05
Fgf4	fibroblast growth factor 4 [Source:MGI Symbol;Acc:MGI:95518]	6.77113	2.7594	0.0280049
Npr3	natriuretic peptide receptor 3 [Source:MGI Symbol;Acc:MGI:97373]	6.73584	2.75186	5.45906e-05
Trem1	triggering receptor expressed on myeloid cells 1 [Source:MGI Symbol;Acc:MGI:1930005]	6.2631	2.64688	1.05845e-05
Crtac1	cartilage acidic protein 1 [Source:MGI Symbol;Acc:MGI:1920082]	6.2241	2.63787	0.0164584
Sprr1a	small proline-rich protein 1A [Source:MGI Symbol;Acc:MGI:106660]	5.89674	2.55992	0.0233512
Cxcl2	chemokine (C-X-C motif) ligand 2 [Source:MGI Symbol;Acc:MGI:1340094]	5.81886	2.54074	0.0278533
Gm45743	predicted gene 45743 [Source:MGI Symbol;Acc:MGI:5804858]	5.57667	2.4794	0.0409785
Mtarc1	mitochondrial amidoxime reducing component 1 [Source:MGI Symbol;Acc:MGI:1913362]	5.54999	2.47249	0.00706655
Mc2r	melanocortin 2 receptor [Source:MGI Symbol;Acc:MGI:96928]	5.4764	2.45323	0.000852205
Tshr	thyroid stimulating hormone receptor [Source:MGI Symbol;Acc:MGI:98849]	5.46614	2.45052	0.00448964
Gm40761	predicted gene, 40761 [Source:MGI Symbol;Acc:MGI:5623646]	5.42778	2.44036	0.0482046
B230303O12Rik	RIKEN cDNA B230303O12 gene [Source:MGI Symbol;Acc:MGI:2442644]	5.34123	2.41717	0.00010858
Prss22	protease, serine 22 [Source:MGI Symbol;Acc:MGI:1918085]	5.23697	2.38873	0.0245741
Timp4	tissue inhibitor of metalloproteinase 4 [Source:MGI Symbol;Acc:MGI:109125]	5.1824	2.37362	0.00517645
Gm20597	predicted gene, 20597 [Source:MGI Symbol;Acc:MGI:5295703]	5.15815	2.36685	3.69441e-12
Gm5424	predicted gene 5424 [Source:MGI Symbol;Acc:MGI:3643173]	5.11771	2.3555	0.00999135
Cacna1e	calcium channel, voltage-dependent, R type, alpha 1E subunit [Source:MGI Symbol;Acc:MGI:106217]	5.10323	2.35141	0.000498764
Ctcflos	CCCTC-binding factor (zinc finger protein)-like, opposite strand [Source:MGI Symbol;Acc:MGI:1921411]	5.05411	2.33746	0.000132764
Gm15519	predicted gene 15519 [Source:MGI Symbol;Acc:MGI:3782965]	5.03174	2.33106	0.00449125
Gm16310	predicted gene 16310 [Source:MGI Symbol;Acc:MGI:3826522]	5.02267	2.32846	0.0471222
Pla2g4b	phospholipase A2, group IVB (cytosolic) [Source:MGI Symbol;Acc:MGI:2384819]	4.95724	2.30954	0.0134844
Fgf13	fibroblast growth factor 13 [Source:MGI Symbol;Acc:MGI:109178]	4.88786	2.2892	0.00113642
Tmem182	transmembrane protein 182 [Source:MGI Symbol;Acc:MGI:1923725]	4.88497	2.28835	0.039139
Cndp1	carnosine dipeptidase 1 (metallopeptidase M20 family) [Source:MGI Symbol;Acc:MGI:2451097]	4.81357	2.26711	2.50977e-06
Pkp1	plakophilin 1 [Source:MGI Symbol;Acc:MGI:1328359]	4.72567	2.24052	0.0200354
Kpna7	karyopherin alpha 7 (importin alpha 8) [Source:MGI Symbol;Acc:MGI:2141165]	4.69157	2.23007	0.0241777
Gm48653	predicted gene, 48653 [Source:MGI Symbol;Acc:MGI:6098263]	4.68661	2.22855	4.5052e-05
Grid1	glutamate receptor, ionotropic, delta 1 [Source:MGI Symbol;Acc:MGI:95812]	4.6502	2.21729	0.000347525
Arg1	arginase, liver [Source:MGI Symbol;Acc:MGI:88070]	4.63562	2.21276	1.0668e-09
Dcst1	DC-STAMP domain containing 1 [Source:MGI Symbol;Acc:MGI:1925022]	4.6294	2.21083	0.0259979
Rasd1	RAS, dexamethasone-induced 1 [Source:MGI Symbol;Acc:MGI:1270848]	4.57501	2.19378	0.00221566
9630010A21Rik	RIKEN cDNA 9630010A21 gene [Source:MGI Symbol;Acc:MGI:2442787]	4.56833	2.19167	0.022259
Il1f9	interleukin 1 family, member 9 [Source:MGI Symbol;Acc:MGI:2449929]	4.54285	2.1836	0.0314425
Fa2h	fatty acid 2-hydroxylase [Source:MGI Symbol;Acc:MGI:2443327]	4.53402	2.18079	0.0139558
Gm43790	predicted gene 43790 [Source:MGI Symbol;Acc:MGI:5663927]	4.53341	2.1806	0.0474596
Plin4	perilipin 4 [Source:MGI Symbol;Acc:MGI:1929709]	4.50561	2.17172	6.98939e-06
Tmem45b	transmembrane protein 45b [Source:MGI Symbol;Acc:MGI:2384574]	4.50069	2.17015	0.0029407
Rgs1	regulator of G-protein signaling 1 [Source:MGI Symbol;Acc:MGI:1354694]	4.48671	2.16566	0.043196
Gm38162	predicted gene, 38162 [Source:MGI Symbol;Acc:MGI:5611390]	4.46194	2.15767	0.000305574
Gm48114	predicted gene, 48114 [Source:MGI Symbol;Acc:MGI:6097467]	4.42611	2.14604	0.0322414
Gpr156	G protein-coupled receptor 156 [Source:MGI Symbol;Acc:MGI:2653880]	4.38157	2.13145	0.0126428
Sptbn5	spectrin beta, non-erythrocytic 5 [Source:MGI Symbol;Acc:MGI:2685200]	4.33134	2.11481	0.000899404
Ache	acetylcholinesterase [Source:MGI Symbol;Acc:MGI:87876]	4.28456	2.09915	0.0194074
Folh1	folate hydrolase 1 [Source:MGI Symbol;Acc:MGI:1858193]	4.26083	2.09113	0.0143111
Cfap100	cilia and flagella associated protein 100 [Source:MGI Symbol;Acc:MGI:2141635]	4.22555	2.07914	0.000576011
2510017J16Rik	RIKEN cDNA 2510017J16 gene [Source:MGI Symbol;Acc:MGI:1913824]	4.22351	2.07844	0.00629102
Dusp9	dual specificity phosphatase 9 [Source:MGI Symbol;Acc:MGI:2387107]	4.1989	2.07001	0.003783
3110080E11Rik	RIKEN cDNA 3110080E11 gene [Source:MGI Symbol;Acc:MGI:1920469]	4.1455	2.05154	0.0391596
Gm38366	predicted gene, 38366 [Source:MGI Symbol;Acc:MGI:5611594]	4.07587	2.02711	0.0042097
Lrrtm1	leucine rich repeat transmembrane neuronal 1 [Source:MGI Symbol;Acc:MGI:2389173]	4.01626	2.00585	0.0426097
Nrg1	neuregulin 1 [Source:MGI Symbol;Acc:MGI:96083]	4.00105	2.00038	5.71184e-10
Adora1	adenosine A1 receptor [Source:MGI Symbol;Acc:MGI:99401]	3.99339	1.99761	0.0126428
Pdzph1	PDZ and pleckstrin homology domains 1 [Source:MGI Symbol;Acc:MGI:1916489]	3.97373	1.99049	0.0193038
Tenm4	teneurin transmembrane protein 4 [Source:MGI Symbol;Acc:MGI:2447063]	3.96888	1.98873	0.000383952
Aqp7	aquaporin 7 [Source:MGI Symbol;Acc:MGI:1314647]	3.95068	1.9821	0.021045
Stmn3	stathmin-like 3 [Source:MGI Symbol;Acc:MGI:1277137]	3.94653	1.98058	0.0281682
Hbegf	heparin-binding EGF-like growth factor [Source:MGI Symbol;Acc:MGI:96070]	3.94422	1.97974	3.69441e-12
Cux2	cut-like homeobox 2 [Source:MGI Symbol;Acc:MGI:107321]	3.92549	1.97287	0.0158935
Fam169a	family with sequence similarity 169, member A [Source:MGI Symbol;Acc:MGI:2444268]	3.90615	1.96575	4.31438e-08
Klhdc7a	kelch domain containing 7A [Source:MGI Symbol;Acc:MGI:2444612]	3.85917	1.94829	0.000261477
Cemip	cell migration inducing protein, hyaluronan binding [Source:MGI Symbol;Acc:MGI:2443629]	3.84576	1.94327	0.000994846
Il1b	interleukin 1 beta [Source:MGI Symbol;Acc:MGI:96543]	3.8358	1.93953	0.00671447
Gm4468	predicted gene 4468 [Source:MGI Symbol;Acc:MGI:3782652]	3.82426	1.93518	0.0142319
Scgb3a1	secretoglobin, family 3A, member 1 [Source:MGI Symbol;Acc:MGI:1915912]	3.80771	1.92892	0.0223383
Il6	interleukin 6 [Source:MGI Symbol;Acc:MGI:96559]	3.78408	1.91994	5.64604e-07
Ppp2r2c	protein phosphatase 2, regulatory subunit B, gamma [Source:MGI Symbol;Acc:MGI:2442660]	3.77485	1.91642	0.0293308
Nptx2	neuronal pentraxin 2 [Source:MGI Symbol;Acc:MGI:1858209]	3.70037	1.88767	1.0668e-09
Gm43844	predicted gene 43844 [Source:MGI Symbol;Acc:MGI:5663981]	3.683	1.88088	0.0305104
Plet1	placenta expressed transcript 1 [Source:MGI Symbol;Acc:MGI:1923759]	3.68128	1.88021	0.00165856
A530053G22Rik	RIKEN cDNA A530053G22 gene [Source:MGI Symbol;Acc:MGI:2443347]	3.65766	1.87092	0.0448368
Cdsn	corneodesmosin [Source:MGI Symbol;Acc:MGI:3505689]	3.58347	1.84136	0.0137297
Gm3289	predicted gene 3289 [Source:MGI Symbol;Acc:MGI:3781467]	3.56102	1.83229	0.0245741
Apol6	apolipoprotein L 6 [Source:MGI Symbol;Acc:MGI:1919189]	3.54689	1.82655	0.00571504
Erich2	glutamate rich 2 [Source:MGI Symbol;Acc:MGI:1913998]	3.45381	1.78819	0.000163586
Acr	acrosin prepropeptide [Source:MGI Symbol;Acc:MGI:87884]	3.44697	1.78533	0.0439233
Stc1	stanniocalcin 1 [Source:MGI Symbol;Acc:MGI:109131]	3.44245	1.78344	9.28109e-07
Mmd	monocyte to macrophage differentiation-associated [Source:MGI Symbol;Acc:MGI:1914718]	3.41673	1.77262	0.0093761
Cyb5r2	cytochrome b5 reductase 2 [Source:MGI Symbol;Acc:MGI:2444415]	3.39422	1.76308	0.00474805
Gm32089	predicted gene, 32089 [Source:MGI Symbol;Acc:MGI:5591248]	3.34081	1.7402	0.0281652
Rasgrf1	RAS protein-specific guanine nucleotide-releasing factor 1 [Source:MGI Symbol;Acc:MGI:99694]	3.24968	1.7003	0.0100168
Gm47644	predicted gene, 47644 [Source:MGI Symbol;Acc:MGI:6096722]	3.24737	1.69927	0.00640718
Gm42892	predicted gene 42892 [Source:MGI Symbol;Acc:MGI:5663029]	3.23492	1.69373	0.00231233
Cxcl5	chemokine (C-X-C motif) ligand 5 [Source:MGI Symbol;Acc:MGI:1096868]	3.2288	1.691	4.40939e-09
Fam83a	family with sequence similarity 83, member A [Source:MGI Symbol;Acc:MGI:2447773]	3.21194	1.68344	0.020086
Gm42462	predicted gene 42462 [Source:MGI Symbol;Acc:MGI:5662599]	3.20914	1.68219	0.00326587
Gm45716	predicted gene 45716 [Source:MGI Symbol;Acc:MGI:5804831]	3.20678	1.68112	0.00555529
Sh2d5	SH2 domain containing 5 [Source:MGI Symbol;Acc:MGI:2446215]	3.15665	1.65839	0.00190656
Cacna2d3	calcium channel, voltage-dependent, alpha2/delta subunit 3 [Source:MGI Symbol;Acc:MGI:1338890]	3.15249	1.65649	0.0329859
Gm42679	predicted gene 42679 [Source:MGI Symbol;Acc:MGI:5662816]	3.14484	1.65299	0.00107165
Gm28043	predicted gene, 28043 [Source:MGI Symbol;Acc:MGI:5547779]	3.13938	1.65048	0.0143111
Gm14286	predicted gene 14286 [Source:MGI Symbol;Acc:MGI:3650190]	3.12749	1.645	0.00612731
Fabp4	fatty acid binding protein 4, adipocyte [Source:MGI Symbol;Acc:MGI:88038]	3.12341	1.64312	0.0264215
Gm25047	predicted gene, 25047 [Source:MGI Symbol;Acc:MGI:5454824]	3.11941	1.64127	0.0172611
Trarg1	trafficking regulator of GLUT4 (SLC2A4) 1 [Source:MGI Symbol;Acc:MGI:3029307]	3.11696	1.64014	0.0106889
Prx	periaxin [Source:MGI Symbol;Acc:MGI:108176]	3.09466	1.62978	0.0075244
Nptx1	neuronal pentraxin 1 [Source:MGI Symbol;Acc:MGI:107811]	3.08646	1.62595	5.32235e-07
Synpo2	synaptopodin 2 [Source:MGI Symbol;Acc:MGI:2153070]	3.0842	1.6249	0.00156149
Il1rl1	interleukin 1 receptor-like 1 [Source:MGI Symbol;Acc:MGI:98427]	3.05435	1.61086	0.00159179
Rph3a	rabphilin 3A [Source:MGI Symbol;Acc:MGI:102788]	3.0469	1.60734	0.0486911
Fam107a	family with sequence similarity 107, member A [Source:MGI Symbol;Acc:MGI:3041256]	3.03411	1.60127	0.000464158
Tnnc1	troponin C, cardiac/slow skeletal [Source:MGI Symbol;Acc:MGI:98779]	3.01255	1.59098	0.0228169
Cdh1	cadherin 1 [Source:MGI Symbol;Acc:MGI:88354]	2.99565	1.58287	1.69999e-05
Adra1a	adrenergic receptor, alpha 1a [Source:MGI Symbol;Acc:MGI:104773]	2.9829	1.57672	0.0120353
Nefl	neurofilament, light polypeptide [Source:MGI Symbol;Acc:MGI:97313]	2.97864	1.57466	0.0399932
Gm37606	predicted gene, 37606 [Source:MGI Symbol;Acc:MGI:5610834]	2.96581	1.56843	0.0168762
Pdk4	pyruvate dehydrogenase kinase, isoenzyme 4 [Source:MGI Symbol;Acc:MGI:1351481]	2.8893	1.53072	5.03667e-05
Gm19938	predicted gene, 19938 [Source:MGI Symbol;Acc:MGI:5012123]	2.88866	1.5304	0.0280187
Smoc1	SPARC related modular calcium binding 1 [Source:MGI Symbol;Acc:MGI:1929878]	2.88277	1.52745	2.45726e-07
Rgcc	regulator of cell cycle [Source:MGI Symbol;Acc:MGI:1913464]	2.8722	1.52215	1.15322e-11
Slc22a3	solute carrier family 22 (organic cation transporter), member 3 [Source:MGI Symbol;Acc:MGI:1333817]	2.86842	1.52026	0.00571504
Edn2	endothelin 2 [Source:MGI Symbol;Acc:MGI:95284]	2.85323	1.51259	0.043855
Plin1	perilipin 1 [Source:MGI Symbol;Acc:MGI:1890505]	2.84556	1.50871	0.015082
Ephb1	Eph receptor B1 [Source:MGI Symbol;Acc:MGI:1096337]	2.84295	1.50739	0.0029407
Lcn2	lipocalin 2 [Source:MGI Symbol;Acc:MGI:96757]	2.83733	1.50453	0.0258439
Plekha7	pleckstrin homology domain containing, family A member 7 [Source:MGI Symbol;Acc:MGI:2445094]	2.83493	1.50331	7.42331e-05
Aqp5	aquaporin 5 [Source:MGI Symbol;Acc:MGI:106215]	2.80135	1.48612	3.69104e-06
Prox2os	prospero homeobox 2 opposite strand [Source:MGI Symbol;Acc:MGI:5011542]	2.79743	1.4841	0.0433412
A530020G20Rik	RIKEN cDNA A530020G20 gene [Source:MGI Symbol;Acc:MGI:2442825]	2.79171	1.48115	0.00209161
Gm42432	predicted gene 42432 [Source:MGI Symbol;Acc:MGI:5662569]	2.79076	1.48066	0.0374364
Tarm1	T cell-interacting, activating receptor on myeloid cells 1 [Source:MGI Symbol;Acc:MGI:2442280]	2.78788	1.47917	7.64968e-06
Il17re	interleukin 17 receptor E [Source:MGI Symbol;Acc:MGI:1889371]	2.76831	1.469	0.00474805
Grhl1	grainyhead like transcription factor 1 [Source:MGI Symbol;Acc:MGI:2182540]	2.71605	1.44151	0.0440884
Grik3	glutamate receptor, ionotropic, kainate 3 [Source:MGI Symbol;Acc:MGI:95816]	2.70126	1.43363	0.0423209
Slc7a10	solute carrier family 7 (cationic amino acid transporter, y+ system), member 10 [Source:MGI Symbol;Acc:MGI:1858261]	2.69647	1.43107	0.0439233
Ecel1	endothelin converting enzyme-like 1 [Source:MGI Symbol;Acc:MGI:1343461]	2.68306	1.42388	0.00101897
Gm26703	predicted gene, 26703 [Source:MGI Symbol;Acc:MGI:5477197]	2.67377	1.41887	0.0433412
Lrtm2	leucine-rich repeats and transmembrane domains 2 [Source:MGI Symbol;Acc:MGI:2141485]	2.62987	1.39499	0.0271697
Gm47218	predicted gene, 47218 [Source:MGI Symbol;Acc:MGI:6096027]	2.61417	1.38635	0.00422765
Gm37474	predicted gene, 37474 [Source:MGI Symbol;Acc:MGI:5610702]	2.61368	1.38608	0.0391291
Gm43162	predicted gene 43162 [Source:MGI Symbol;Acc:MGI:5663299]	2.60505	1.38131	0.021139
Apln	apelin [Source:MGI Symbol;Acc:MGI:1353624]	2.60258	1.37994	0.0170628
Prkar2b	protein kinase, cAMP dependent regulatory, type II beta [Source:MGI Symbol;Acc:MGI:97760]	2.58748	1.37155	0.00769297
Snhg11	small nucleolar RNA host gene 11 [Source:MGI Symbol;Acc:MGI:2441845]	2.58744	1.37153	7.34362e-05
Krtcap3	keratinocyte associated protein 3 [Source:MGI Symbol;Acc:MGI:1917065]	2.56405	1.35842	0.0104341
G0s2	G0/G1 switch gene 2 [Source:MGI Symbol;Acc:MGI:1316737]	2.53482	1.34188	0.0194074
Mss51	MSS51 mitochondrial translational activator [Source:MGI Symbol;Acc:MGI:1922093]	2.52825	1.33814	0.0284145
Foxf2	forkhead box F2 [Source:MGI Symbol;Acc:MGI:1347479]	2.52149	1.33427	0.00353044
A730011C13Rik	RIKEN cDNA A730011C13 gene [Source:MGI Symbol;Acc:MGI:2442973]	2.52066	1.3338	0.0100274
Fxyd7	FXYD domain-containing ion transport regulator 7 [Source:MGI Symbol;Acc:MGI:1889006]	2.4929	1.31783	0.000724113
Pkp2	plakophilin 2 [Source:MGI Symbol;Acc:MGI:1914701]	2.49283	1.31779	0.000690505
Nefm	neurofilament, medium polypeptide [Source:MGI Symbol;Acc:MGI:97314]	2.48464	1.31303	0.0117322
4930447C04Rik	RIKEN cDNA 4930447C04 gene [Source:MGI Symbol;Acc:MGI:1923051]	2.48345	1.31235	0.0217093
AA467197	expressed sequence AA467197 [Source:MGI Symbol;Acc:MGI:3034182]	2.48256	1.31183	0.00929988
Smco3	single-pass membrane protein with coiled-coil domains 3 [Source:MGI Symbol;Acc:MGI:2443451]	2.44427	1.2894	0.023485
Mfsd2a	major facilitator superfamily domain containing 2A [Source:MGI Symbol;Acc:MGI:1923824]	2.44185	1.28798	0.0137525
Cadm3	cell adhesion molecule 3 [Source:MGI Symbol;Acc:MGI:2137858]	2.4396	1.28665	0.0187409
Mt2	metallothionein 2 [Source:MGI Symbol;Acc:MGI:97172]	2.43854	1.28602	4.38187e-05
Glp1r	glucagon-like peptide 1 receptor [Source:MGI Symbol;Acc:MGI:99571]	2.43508	1.28397	0.0173905
Gm42940	predicted gene 42940 [Source:MGI Symbol;Acc:MGI:5663077]	2.43281	1.28263	0.0344595
Lrg1	leucine-rich alpha-2-glycoprotein 1 [Source:MGI Symbol;Acc:MGI:1924155]	2.42955	1.28069	0.0123168
Gpr37l1	G protein-coupled receptor 37-like 1 [Source:MGI Symbol;Acc:MGI:1928503]	2.42451	1.2777	0.000611078
Drp2	dystrophin related protein 2 [Source:MGI Symbol;Acc:MGI:107432]	2.42274	1.27664	0.00227381
Gm44829	predicted gene 44829 [Source:MGI Symbol;Acc:MGI:5753405]	2.42038	1.27523	0.0362596
Cabp1	calcium binding protein 1 [Source:MGI Symbol;Acc:MGI:1352750]	2.41443	1.27168	3.13609e-06
Ccl2	chemokine (C-C motif) ligand 2 [Source:MGI Symbol;Acc:MGI:98259]	2.40307	1.26488	0.00955946
Kcnk3	potassium channel, subfamily K, member 3 [Source:MGI Symbol;Acc:MGI:1100509]	2.40191	1.26418	0.0337583
Gprc5a	G protein-coupled receptor, family C, group 5, member A [Source:MGI Symbol;Acc:MGI:1891250]	2.38199	1.25217	0.00655503
Pmp22	peripheral myelin protein 22 [Source:MGI Symbol;Acc:MGI:97631]	2.37526	1.24809	0.00268319
Gm12530	predicted gene 12530 [Source:MGI Symbol;Acc:MGI:3651546]	2.37288	1.24664	0.00587163
Kif5c	kinesin family member 5C [Source:MGI Symbol;Acc:MGI:1098269]	2.36735	1.24327	0.000423217
Serpina3n	serine (or cysteine) peptidase inhibitor, clade A, member 3N [Source:MGI Symbol;Acc:MGI:105045]	2.35605	1.23637	0.0348153
Grp	gastrin releasing peptide [Source:MGI Symbol;Acc:MGI:95833]	2.35306	1.23454	0.0402101
Sostdc1	sclerostin domain containing 1 [Source:MGI Symbol;Acc:MGI:1913292]	2.35288	1.23443	6.52278e-05
Gm49759	predicted gene, 49759 [Source:MGI Symbol;Acc:MGI:6215263]	2.33076	1.2208	8.423e-10
Gm42783	predicted gene 42783 [Source:MGI Symbol;Acc:MGI:5662920]	2.32537	1.21746	0.0449704
Mir100hg	Mir100 Mirlet7a-2 Mir125b-1 cluster host gene [Source:MGI Symbol;Acc:MGI:1920394]	2.32248	1.21567	8.92958e-07
AI115009	expressed sequence AI115009 [Source:MGI Symbol;Acc:MGI:2139623]	2.31993	1.21408	0.0479822
Gm14295	predicted gene 14295 [Source:MGI Symbol;Acc:MGI:3709624]	2.31673	1.21209	4.06244e-06
Osm	oncostatin M [Source:MGI Symbol;Acc:MGI:104749]	2.31223	1.20928	0.0362596
Ldlr	low density lipoprotein receptor [Source:MGI Symbol;Acc:MGI:96765]	2.30578	1.20525	0.00558452
Ccl7	chemokine (C-C motif) ligand 7 [Source:MGI Symbol;Acc:MGI:99512]	2.30136	1.20249	0.0129717
Rimklb	ribosomal modification protein rimK-like family member B [Source:MGI Symbol;Acc:MGI:1918325]	2.27576	1.18635	0.00390077
Ephb6	Eph receptor B6 [Source:MGI Symbol;Acc:MGI:1096338]	2.25174	1.17104	0.0111465
Hoxd4	homeobox D4 [Source:MGI Symbol;Acc:MGI:96208]	2.24463	1.16647	0.0106889
Fgfr3	fibroblast growth factor receptor 3 [Source:MGI Symbol;Acc:MGI:95524]	2.24345	1.16572	9.15887e-05
Gm10785	predicted gene 10785 [Source:MGI Symbol;Acc:MGI:3642149]	2.239	1.16286	0.0463447
Hmox1	heme oxygenase 1 [Source:MGI Symbol;Acc:MGI:96163]	2.23888	1.16278	0.00168927
Amy1	amylase 1, salivary [Source:MGI Symbol;Acc:MGI:88019]	2.23817	1.16232	0.0200286
E230020A03Rik	RIKEN cDNA E230020A03 gene [Source:MGI Symbol;Acc:MGI:2442139]	2.22377	1.15301	0.00455413
Chdh	choline dehydrogenase [Source:MGI Symbol;Acc:MGI:1860776]	2.22032	1.15077	0.0418771
Slc22a4	solute carrier family 22 (organic cation transporter), member 4 [Source:MGI Symbol;Acc:MGI:1353479]	2.2084	1.143	0.0433412
AA465934	expressed sequence AA465934 [Source:MGI Symbol;Acc:MGI:2671018]	2.20356	1.13983	0.0314804
Slc36a2	solute carrier family 36 (proton/amino acid symporter), member 2 [Source:MGI Symbol;Acc:MGI:1891430]	2.19708	1.13559	0.000876492
Tspoap1	TSPO associated protein 1 [Source:MGI Symbol;Acc:MGI:2450877]	2.1945	1.1339	0.0326488
Inhba	inhibin beta-A [Source:MGI Symbol;Acc:MGI:96570]	2.1904	1.1312	0.000490965
Gm43029	predicted gene 43029 [Source:MGI Symbol;Acc:MGI:5663166]	2.1851	1.1277	0.0387548
NA	NA	2.17799	1.123	3.26338e-06
Gm9892	predicted gene 9892 [Source:MGI Symbol;Acc:MGI:3701610]	2.17448	1.12067	0.0362596
Gm37206	predicted gene, 37206 [Source:MGI Symbol;Acc:MGI:5610434]	2.17401	1.12036	0.00149848
Gm44667	predicted gene 44667 [Source:MGI Symbol;Acc:MGI:5753243]	2.1694	1.1173	0.0332074
Pfkfb3	6-phosphofructo-2-kinase/fructose-2,6-biphosphatase 3 [Source:MGI Symbol;Acc:MGI:2181202]	2.15893	1.11031	0.0239907
Stk32b	serine/threonine kinase 32B [Source:MGI Symbol;Acc:MGI:1927552]	2.15664	1.10878	0.00135453
Ackr1	atypical chemokine receptor 1 (Duffy blood group) [Source:MGI Symbol;Acc:MGI:1097689]	2.13681	1.09546	0.000129767
Zfp692	zinc finger protein 692 [Source:MGI Symbol;Acc:MGI:2144276]	2.13512	1.09431	0.014975
Cxcl14	chemokine (C-X-C motif) ligand 14 [Source:MGI Symbol;Acc:MGI:1888514]	2.13208	1.09226	0.0134291
Egr2	early growth response 2 [Source:MGI Symbol;Acc:MGI:95296]	2.13067	1.0913	0.00785323
Neat1	nuclear paraspeckle assembly transcript 1 (non-protein coding) [Source:MGI Symbol;Acc:MGI:1914211]	2.12797	1.08948	0.000440109
Inhbb	inhibin beta-B [Source:MGI Symbol;Acc:MGI:96571]	2.12649	1.08848	0.00188836
A330023F24Rik	RIKEN cDNA A330023F24 gene [Source:MGI Symbol;Acc:MGI:2443958]	2.11868	1.08316	0.00209558
Gm37827	predicted gene, 37827 [Source:MGI Symbol;Acc:MGI:5611055]	2.10966	1.07701	0.0162049
Rai2	retinoic acid induced 2 [Source:MGI Symbol;Acc:MGI:1344378]	2.09071	1.06399	4.38187e-05
Mir17hg	Mir17 host gene (non-protein coding) [Source:MGI Symbol;Acc:MGI:1923207]	2.08855	1.0625	0.000245721
Sod3	superoxide dismutase 3, extracellular [Source:MGI Symbol;Acc:MGI:103181]	2.08698	1.06142	0.0284592
Cxcl1	chemokine (C-X-C motif) ligand 1 [Source:MGI Symbol;Acc:MGI:108068]	2.08134	1.05752	0.00176274
Saa1	serum amyloid A 1 [Source:MGI Symbol;Acc:MGI:98221]	2.079	1.05589	0.00904353
Ret	ret proto-oncogene [Source:MGI Symbol;Acc:MGI:97902]	2.07419	1.05255	0.0200286
Kcnq1ot1	KCNQ1 overlapping transcript 1 [Source:MGI Symbol;Acc:MGI:1926855]	2.06581	1.04671	0.000440222
Gm26682	predicted gene, 26682 [Source:MGI Symbol;Acc:MGI:5477176]	2.06498	1.04613	0.0143111
F730043M19Rik	RIKEN cDNA F730043M19 gene [Source:MGI Symbol;Acc:MGI:2443237]	2.06496	1.04611	8.61446e-05
Dio3	deiodinase, iodothyronine type III [Source:MGI Symbol;Acc:MGI:1306782]	2.05481	1.039	0.0029407
Car4	carbonic anhydrase 4 [Source:MGI Symbol;Acc:MGI:1096574]	2.05459	1.03885	0.014975
Gm37309	predicted gene, 37309 [Source:MGI Symbol;Acc:MGI:5610537]	2.05422	1.03859	0.0143111
Zfp971	zinc finger protein 971 [Source:MGI Symbol;Acc:MGI:1261426]	2.05055	1.03601	0.000351893
Thbs1	thrombospondin 1 [Source:MGI Symbol;Acc:MGI:98737]	2.04856	1.03461	0.0286364
Snhg17	small nucleolar RNA host gene 17 [Source:MGI Symbol;Acc:MGI:1915358]	2.03534	1.02527	4.17996e-07
Apold1	apolipoprotein L domain containing 1 [Source:MGI Symbol;Acc:MGI:2685921]	2.03144	1.0225	0.00165856
Nxph3	neurexophilin 3 [Source:MGI Symbol;Acc:MGI:1336188]	2.02965	1.02123	0.00072837
Irs3	insulin receptor substrate 3 [Source:MGI Symbol;Acc:MGI:1194882]	2.0269	1.01927	0.0327785
Gm45221	predicted gene 45221 [Source:MGI Symbol;Acc:MGI:5753797]	2.02637	1.0189	0.0426097
2700038G22Rik	RIKEN cDNA 2700038G22 gene [Source:MGI Symbol;Acc:MGI:1914444]	2.02041	1.01465	0.00652918
Noct	nocturnin [Source:MGI Symbol;Acc:MGI:109382]	2.01839	1.0132	0.00114029
Sema7a	sema domain, immunoglobulin domain (Ig), and GPI membrane anchor, (semaphorin) 7A [Source:MGI Symbol;Acc:MGI:1306826]	2.0171	1.01229	0.0425418
Slc16a6	solute carrier family 16 (monocarboxylic acid transporters), member 6 [Source:MGI Symbol;Acc:MGI:2144585]	2.00406	1.00293	0.0244117
Vsig2	V-set and immunoglobulin domain containing 2 [Source:MGI Symbol;Acc:MGI:1928009]	2.00176	1.00127	0.022508
Gprasp2	G protein-coupled receptor associated sorting protein 2 [Source:MGI Symbol;Acc:MGI:2442071]	0.499759	-1.0007	0.0426097
Flrt3	fibronectin leucine rich transmembrane protein 3 [Source:MGI Symbol;Acc:MGI:1918686]	0.499448	-1.00159	2.58493e-07
Fbxo32	F-box protein 32 [Source:MGI Symbol;Acc:MGI:1914981]	0.498316	-1.00487	0.000143326
Cdh19	cadherin 19, type 2 [Source:MGI Symbol;Acc:MGI:3588198]	0.498033	-1.00569	0.00339956
Ramp1	receptor (calcitonin) activity modifying protein 1 [Source:MGI Symbol;Acc:MGI:1858418]	0.496249	-1.01086	0.00365717
Islr	immunoglobulin superfamily containing leucine-rich repeat [Source:MGI Symbol;Acc:MGI:1349645]	0.495169	-1.01401	0.000929437
Musk	muscle, skeletal, receptor tyrosine kinase [Source:MGI Symbol;Acc:MGI:103581]	0.492696	-1.02123	0.0224422
Fat3	FAT atypical cadherin 3 [Source:MGI Symbol;Acc:MGI:2444314]	0.489116	-1.03175	0.000611078
Baalc	brain and acute leukemia, cytoplasmic [Source:MGI Symbol;Acc:MGI:1928704]	0.48905	-1.03195	0.00115766
Glt8d2	glycosyltransferase 8 domain containing 2 [Source:MGI Symbol;Acc:MGI:1922032]	0.488573	-1.03335	0.00185036
Aspa	aspartoacylase [Source:MGI Symbol;Acc:MGI:87914]	0.486103	-1.04067	0.000692588
Ptn	pleiotrophin [Source:MGI Symbol;Acc:MGI:97804]	0.485632	-1.04207	1.26787e-05
Ctxn1	cortexin 1 [Source:MGI Symbol;Acc:MGI:88566]	0.484165	-1.04643	0.0301461
Camk1g	calcium/calmodulin-dependent protein kinase I gamma [Source:MGI Symbol;Acc:MGI:2388073]	0.473226	-1.0794	0.0288064
Atp8a2	ATPase, aminophospholipid transporter-like, class I, type 8A, member 2 [Source:MGI Symbol;Acc:MGI:1354710]	0.472618	-1.08125	0.0142162
Pcolce2	procollagen C-endopeptidase enhancer 2 [Source:MGI Symbol;Acc:MGI:1923727]	0.471963	-1.08326	0.0076412
A230001M10Rik	RIKEN cDNA A230001M10 gene [Source:MGI Symbol;Acc:MGI:2443043]	0.470258	-1.08848	0.0426097
Ttc23l	tetratricopeptide repeat domain 23-like [Source:MGI Symbol;Acc:MGI:1923027]	0.469493	-1.09082	0.00775264
Itm2a	integral membrane protein 2A [Source:MGI Symbol;Acc:MGI:107706]	0.469296	-1.09143	7.04971e-09
Plxdc1	plexin domain containing 1 [Source:MGI Symbol;Acc:MGI:1919574]	0.469177	-1.0918	0.00221811
Tmem255a	transmembrane protein 255A [Source:MGI Symbol;Acc:MGI:3045722]	0.468345	-1.09436	0.0139777
Cst6	cystatin E/M [Source:MGI Symbol;Acc:MGI:1920970]	0.46513	-1.10429	0.00142296
Rtl9	retrotransposon Gag like 9 [Source:MGI Symbol;Acc:MGI:2685231]	0.464918	-1.10495	0.00475215
Cilp	cartilage intermediate layer protein, nucleotide pyrophosphohydrolase [Source:MGI Symbol;Acc:MGI:2444507]	0.463969	-1.1079	0.0479822
Epha5	Eph receptor A5 [Source:MGI Symbol;Acc:MGI:99654]	0.462377	-1.11286	0.0106889
Tspyl5	testis-specific protein, Y-encoded-like 5 [Source:MGI Symbol;Acc:MGI:2442458]	0.459877	-1.12068	4.48053e-05
Tet1	tet methylcytosine dioxygenase 1 [Source:MGI Symbol;Acc:MGI:1098693]	0.456323	-1.13187	1.80687e-05
Pla2g4c	phospholipase A2, group IVC (cytosolic, calcium-independent) [Source:MGI Symbol;Acc:MGI:1196403]	0.453534	-1.14072	0.00467933
Atf3	activating transcription factor 3 [Source:MGI Symbol;Acc:MGI:109384]	0.452212	-1.14493	1.2784e-10
Wnt2	wingless-type MMTV integration site family, member 2 [Source:MGI Symbol;Acc:MGI:98954]	0.446001	-1.16488	0.014975
Elfn2	leucine rich repeat and fibronectin type III, extracellular 2 [Source:MGI Symbol;Acc:MGI:3608416]	0.443398	-1.17333	0.0423209
Sytl2	synaptotagmin-like 2 [Source:MGI Symbol;Acc:MGI:1933366]	0.442717	-1.17554	2.47014e-08
A330074K22Rik	RIKEN cDNA A330074K22 gene [Source:MGI Symbol;Acc:MGI:3045392]	0.439471	-1.18616	0.0146008
Tlr12	toll-like receptor 12 [Source:MGI Symbol;Acc:MGI:3045221]	0.434132	-1.2038	0.00390077
Tmem35a	transmembrane protein 35A [Source:MGI Symbol;Acc:MGI:1914814]	0.42927	-1.22004	0.0374364
9130410C08Rik	RIKEN cDNA 9130410C08 gene [Source:MGI Symbol;Acc:MGI:1918862]	0.42769	-1.22536	0.00178704
Duoxa1	dual oxidase maturation factor 1 [Source:MGI Symbol;Acc:MGI:2384861]	0.425816	-1.2317	0.000946157
Gm35363	predicted gene, 35363 [Source:MGI Symbol;Acc:MGI:5594522]	0.425787	-1.2318	0.0347973
4921528I07Rik	RIKEN cDNA 4921528I07 gene [Source:MGI Symbol;Acc:MGI:1924299]	0.418931	-1.25522	0.0189327
Rcan2	regulator of calcineurin 2 [Source:MGI Symbol;Acc:MGI:1858219]	0.418496	-1.25672	1.0668e-09
Capn6	calpain 6 [Source:MGI Symbol;Acc:MGI:1100850]	0.416058	-1.26514	1.17687e-14
Tll1	tolloid-like [Source:MGI Symbol;Acc:MGI:106923]	0.413354	-1.27455	1.11594e-07
Ptgr1	prostaglandin reductase 1 [Source:MGI Symbol;Acc:MGI:1914353]	0.410575	-1.28428	3.92839e-15
Pnmal2	PNMA-like 2 [Source:MGI Symbol;Acc:MGI:3645856]	0.409768	-1.28712	0.0200286
Gadd45a	growth arrest and DNA-damage-inducible 45 alpha [Source:MGI Symbol;Acc:MGI:107799]	0.407133	-1.29643	8.28353e-16
Mmp16	matrix metallopeptidase 16 [Source:MGI Symbol;Acc:MGI:1276107]	0.403836	-1.30816	0.0134155
Cdk15	cyclin-dependent kinase 15 [Source:MGI Symbol;Acc:MGI:3583944]	0.39935	-1.32427	0.00174553
Pdgfrl	platelet-derived growth factor receptor-like [Source:MGI Symbol;Acc:MGI:1916047]	0.398582	-1.32705	4.38187e-05
Atp6v0a4	ATPase, H+ transporting, lysosomal V0 subunit A4 [Source:MGI Symbol;Acc:MGI:2153480]	0.398372	-1.32781	0.000440109
Ypel1	yippee like 1 [Source:MGI Symbol;Acc:MGI:1913303]	0.396117	-1.336	6.13608e-05
Veph1	ventricular zone expressed PH domain-containing 1 [Source:MGI Symbol;Acc:MGI:1920039]	0.394994	-1.3401	0.0256729
Gm4804	predicted gene 4804 [Source:MGI Symbol;Acc:MGI:3646648]	0.39341	-1.34589	0.0008037
Slc37a1	solute carrier family 37 (glycerol-3-phosphate transporter), member 1 [Source:MGI Symbol;Acc:MGI:2446181]	0.391941	-1.35129	7.48938e-10
Ypel4	yippee like 4 [Source:MGI Symbol;Acc:MGI:3605071]	0.391029	-1.35465	0.0036723
Pon1	paraoxonase 1 [Source:MGI Symbol;Acc:MGI:103295]	0.389703	-1.35955	0.0315996
S100b	S100 protein, beta polypeptide, neural [Source:MGI Symbol;Acc:MGI:98217]	0.38908	-1.36186	0.000257618
Igfbp2	insulin-like growth factor binding protein 2 [Source:MGI Symbol;Acc:MGI:96437]	0.387038	-1.36945	0.000123545
Mfap4	microfibrillar-associated protein 4 [Source:MGI Symbol;Acc:MGI:1342276]	0.386896	-1.36998	5.33496e-05
Gpr162	G protein-coupled receptor 162 [Source:MGI Symbol;Acc:MGI:1315214]	0.376222	-1.41034	0.0117144
Spock1	sparc/osteonectin, cwcv and kazal-like domains proteoglycan 1 [Source:MGI Symbol;Acc:MGI:105371]	0.368479	-1.44035	0.0130666
Rundc3a	RUN domain containing 3A [Source:MGI Symbol;Acc:MGI:1858752]	0.367031	-1.44603	0.00559529
Map6d1	MAP6 domain containing 1 [Source:MGI Symbol;Acc:MGI:3607784]	0.365707	-1.45124	0.00912533
Gjb2	gap junction protein, beta 2 [Source:MGI Symbol;Acc:MGI:95720]	0.364782	-1.45489	0.000415109
Frmpd1	FERM and PDZ domain containing 1 [Source:MGI Symbol;Acc:MGI:2446274]	0.364479	-1.45609	0.0478325
Gm12504	predicted pseudogene 12504 [Source:MGI Symbol;Acc:MGI:3651567]	0.363338	-1.46061	0.0474596
Scube2	signal peptide, CUB domain, EGF-like 2 [Source:MGI Symbol;Acc:MGI:1928765]	0.362582	-1.46362	0.0158935
Fgfbp3	fibroblast growth factor binding protein 3 [Source:MGI Symbol;Acc:MGI:1919764]	0.360656	-1.4713	1.6937e-07
Tssk6	testis-specific serine kinase 6 [Source:MGI Symbol;Acc:MGI:2148775]	0.358906	-1.47832	0.00114649
Radx	RPA1 related single stranded DNA binding protein, X-linked [Source:MGI Symbol;Acc:MGI:2147848]	0.358122	-1.48148	0.0106889
Ngef	neuronal guanine nucleotide exchange factor [Source:MGI Symbol;Acc:MGI:1858414]	0.352475	-1.50441	0.000138827
Ppef1	protein phosphatase with EF hand calcium-binding domain 1 [Source:MGI Symbol;Acc:MGI:1097157]	0.351907	-1.50674	0.0256797
A230009B12Rik	RIKEN cDNA A230009B12 gene [Source:MGI Symbol;Acc:MGI:2442666]	0.344316	-1.53819	0.00168927
Fndc5	fibronectin type III domain containing 5 [Source:MGI Symbol;Acc:MGI:1917614]	0.343054	-1.54349	1.28248e-08
Cdcp1	CUB domain containing protein 1 [Source:MGI Symbol;Acc:MGI:2442010]	0.340735	-1.55328	0.0120381
Gzma	granzyme A [Source:MGI Symbol;Acc:MGI:109266]	0.337446	-1.56727	0.0304268
Slitrk6	SLIT and NTRK-like family, member 6 [Source:MGI Symbol;Acc:MGI:2443198]	0.335902	-1.57389	0.00207533
Kcns1	K+ voltage-gated channel, subfamily S, 1 [Source:MGI Symbol;Acc:MGI:1197019]	0.335025	-1.57766	0.0293767
Cyp2e1	cytochrome P450, family 2, subfamily e, polypeptide 1 [Source:MGI Symbol;Acc:MGI:88607]	0.331402	-1.59335	0.0463248
Myo16	myosin XVI [Source:MGI Symbol;Acc:MGI:2685951]	0.324827	-1.62226	0.0184831
Cubn	cubilin (intrinsic factor-cobalamin receptor) [Source:MGI Symbol;Acc:MGI:1931256]	0.322364	-1.63324	2.94548e-05
Nr1h4	nuclear receptor subfamily 1, group H, member 4 [Source:MGI Symbol;Acc:MGI:1352464]	0.321471	-1.63724	4.49639e-07
Slc17a8	solute carrier family 17 (sodium-dependent inorganic phosphate cotransporter), member 8 [Source:MGI Symbol;Acc:MGI:3039629]	0.3213	-1.63801	2.37158e-10
Kcna4	potassium voltage-gated channel, shaker-related subfamily, member 4 [Source:MGI Symbol;Acc:MGI:96661]	0.319045	-1.64817	0.000284254
Slc26a7	solute carrier family 26, member 7 [Source:MGI Symbol;Acc:MGI:2384791]	0.317667	-1.65441	0.00807477
Klhl34	kelch-like 34 [Source:MGI Symbol;Acc:MGI:2685234]	0.310399	-1.6878	0.0125811
Cdh10	cadherin 10 [Source:MGI Symbol;Acc:MGI:107436]	0.30406	-1.71757	3.77657e-05
Sntg1	syntrophin, gamma 1 [Source:MGI Symbol;Acc:MGI:1918346]	0.303583	-1.71984	0.0418319
Sytl5	synaptotagmin-like 5 [Source:MGI Symbol;Acc:MGI:2668451]	0.297328	-1.74987	0.00998477
Fsd1	fibronectin type 3 and SPRY domain-containing protein [Source:MGI Symbol;Acc:MGI:1934858]	0.297014	-1.7514	0.027429
Rlbp1	retinaldehyde binding protein 1 [Source:MGI Symbol;Acc:MGI:97930]	0.296403	-1.75437	0.00185297
Gm10941	predicted gene 10941 [Source:MGI Symbol;Acc:MGI:3779151]	0.296105	-1.75582	0.0104244
Gm4131	predicted gene 4131 [Source:MGI Symbol;Acc:MGI:3782307]	0.29541	-1.75921	5.03667e-05
Corin	corin, serine peptidase [Source:MGI Symbol;Acc:MGI:1349451]	0.293959	-1.76631	0.00673333
Hhip	Hedgehog-interacting protein [Source:MGI Symbol;Acc:MGI:1341847]	0.289799	-1.78688	0.0177302
Pcdh20	protocadherin 20 [Source:MGI Symbol;Acc:MGI:2443376]	0.286451	-1.80364	0.000602105
Atp6v0d2	ATPase, H+ transporting, lysosomal V0 subunit D2 [Source:MGI Symbol;Acc:MGI:1924415]	0.275314	-1.86085	0.0286435
Bfsp2	beaded filament structural protein 2, phakinin [Source:MGI Symbol;Acc:MGI:1333828]	0.27487	-1.86318	0.00655503
Olig1	oligodendrocyte transcription factor 1 [Source:MGI Symbol;Acc:MGI:1355334]	0.266361	-1.90855	0.0249137
Nkx6-2	NK6 homeobox 2 [Source:MGI Symbol;Acc:MGI:1352738]	0.257058	-1.95984	0.00286174
NA	NA	0.255973	-1.96594	0.0238763
Ggt1	gamma-glutamyltransferase 1 [Source:MGI Symbol;Acc:MGI:95706]	0.251145	-1.99341	0.039139
Fam163a	family with sequence similarity 163, member A [Source:MGI Symbol;Acc:MGI:3618859]	0.245519	-2.02609	0.00948261
Eef1a2	eukaryotic translation elongation factor 1 alpha 2 [Source:MGI Symbol;Acc:MGI:1096317]	0.241089	-2.05236	0.0125811
B3galt5	UDP-Gal:betaGlcNAc beta 1,3-galactosyltransferase, polypeptide 5 [Source:MGI Symbol;Acc:MGI:2136878]	0.240578	-2.05542	2.45726e-07
Nyap2	neuronal tyrosine-phophorylated phosphoinositide 3-kinase adaptor 2 [Source:MGI Symbol;Acc:MGI:2443135]	0.237971	-2.07114	1.28982e-06
Atp10b	ATPase, class V, type 10B [Source:MGI Symbol;Acc:MGI:2442688]	0.2343	-2.09357	2.11703e-06
Cdh6	cadherin 6 [Source:MGI Symbol;Acc:MGI:107435]	0.233332	-2.09954	5.52396e-07
Tmem158	transmembrane protein 158 [Source:MGI Symbol;Acc:MGI:1919559]	0.216778	-2.20571	4.40187e-05
Cyp2s1	cytochrome P450, family 2, subfamily s, polypeptide 1 [Source:MGI Symbol;Acc:MGI:1921384]	0.206284	-2.27729	2.50096e-12
Crybb1	crystallin, beta B1 [Source:MGI Symbol;Acc:MGI:104992]	0.204078	-2.29281	0.000371366
Rit2	Ras-like without CAAX 2 [Source:MGI Symbol;Acc:MGI:108054]	0.193987	-2.36597	9.28109e-07
Rhd	Rh blood group, D antigen [Source:MGI Symbol;Acc:MGI:1202882]	0.188954	-2.40389	0.00503149
Ccl28	chemokine (C-C motif) ligand 28 [Source:MGI Symbol;Acc:MGI:1861731]	0.186349	-2.42392	0.000427948
Nrk	Nik related kinase [Source:MGI Symbol;Acc:MGI:1351326]	0.179193	-2.48041	2.26936e-15
Esrp1	epithelial splicing regulatory protein 1 [Source:MGI Symbol;Acc:MGI:1917326]	0.171619	-2.54272	0.00149848
6330403K07Rik	RIKEN cDNA 6330403K07 gene [Source:MGI Symbol;Acc:MGI:1918001]	0.168216	-2.57162	0.000186497
Col10a1	collagen, type X, alpha 1 [Source:MGI Symbol;Acc:MGI:88445]	0.163639	-2.61141	0.0138939
Gm13031	predicted gene 13031 [Source:MGI Symbol;Acc:MGI:3702680]	0.157937	-2.66257	0.00445174
Tagln3	transgelin 3 [Source:MGI Symbol;Acc:MGI:1926784]	0.157445	-2.66708	1.07573e-10
Klhl32	kelch-like 32 [Source:MGI Symbol;Acc:MGI:3612790]	0.148111	-2.75525	1.89408e-09
Adh7	alcohol dehydrogenase 7 (class IV), mu or sigma polypeptide [Source:MGI Symbol;Acc:MGI:87926]	0.140461	-2.83176	6.02943e-15
Lingo3	leucine rich repeat and Ig domain containing 3 [Source:MGI Symbol;Acc:MGI:3609246]	0.123111	-3.02196	3.0279e-11
Aldh3a1	aldehyde dehydrogenase family 3, subfamily A1 [Source:MGI Symbol;Acc:MGI:1353451]	0.116032	-3.1074	6.64653e-16
Gzmb	granzyme B [Source:MGI Symbol;Acc:MGI:109267]	0.113969	-3.13329	5.48479e-06
Klk1	kallikrein 1 [Source:MGI Symbol;Acc:MGI:102850]	0.11058	-3.17684	0.0316421
Xkr7	X-linked Kx blood group related 7 [Source:MGI Symbol;Acc:MGI:3526711]	0.108795	-3.20032	1.71877e-10
Pgr	progesterone receptor [Source:MGI Symbol;Acc:MGI:97567]	0.0960959	-3.37938	4.50942e-05
Gm11379	predicted gene 11379 [Source:MGI Symbol;Acc:MGI:3650783]	0.0837492	-3.57778	0.0164584
Mup11	major urinary protein 11 [Source:MGI Symbol;Acc:MGI:3709617]	0.0353278	-4.82305	0.00908724
Mup22	major urinary protein 22 [Source:MGI Symbol;Acc:MGI:5434675]	0.0293274	-5.09161	0.000709208

## Sheet: C
(C) The 822 genes differentially expressed between 3 day cut compard to uninjured nerves in aged and young WT mice (WT 3 day cut/UI aged vs young)
Gene		Fold Change	log Fold Change	Adjusted p Value
Npy6r	neuropeptide Y receptor Y6 [Source:MGI Symbol;Acc:MGI:1098590]	18.9548	4.24449	2.39433e-05
Il1f9	interleukin 1 family, member 9 [Source:MGI Symbol;Acc:MGI:2449929]	11.9305	3.57658	0.000933593
Ttll6	tubulin tyrosine ligase-like family, member 6 [Source:MGI Symbol;Acc:MGI:2683461]	6.21466	2.63568	0.0223416
Tafa1	TAFA chemokine like family member 1 [Source:MGI Symbol;Acc:MGI:2443695]	6.19019	2.62998	0.000710196
Serpinb2	serine (or cysteine) peptidase inhibitor, clade B, member 2 [Source:MGI Symbol;Acc:MGI:97609]	5.91743	2.56497	8.67313e-05
Gm31410	predicted gene, 31410 [Source:MGI Symbol;Acc:MGI:5590569]	5.72528	2.51735	0.0270558
Cplx3	complexin 3 [Source:MGI Symbol;Acc:MGI:2384571]	5.71986	2.51598	0.0132174
Them5	thioesterase superfamily member 5 [Source:MGI Symbol;Acc:MGI:1913448]	5.52562	2.46614	2.0679e-06
Gm7804	predicted gene 7804 [Source:MGI Symbol;Acc:MGI:3643373]	5.29376	2.40429	0.0274422
Adgrg7	adhesion G protein-coupled receptor G7 [Source:MGI Symbol;Acc:MGI:2441732]	5.22723	2.38605	0.000526401
Vmn1r181	vomeronasal 1 receptor 181 [Source:MGI Symbol;Acc:MGI:3033489]	4.88222	2.28754	0.00102941
Cdrt4os2	CMT1A duplicated region transcript 4, opposite strand 2 [Source:MGI Symbol;Acc:MGI:3705321]	4.61333	2.20581	0.0168296
Tekt5	tektin 5 [Source:MGI Symbol;Acc:MGI:1917676]	4.45289	2.15474	0.0114298
Gm3571	predicted gene 3571 [Source:MGI Symbol;Acc:MGI:3781748]	4.31796	2.11035	0.0368897
Fa2h	fatty acid 2-hydroxylase [Source:MGI Symbol;Acc:MGI:2443327]	4.08708	2.03107	0.000498703
Gm48015	predicted gene, 48015 [Source:MGI Symbol;Acc:MGI:6097323]	4.05941	2.02127	0.0452837
Cnga2	cyclic nucleotide gated channel alpha 2 [Source:MGI Symbol;Acc:MGI:108040]	3.97498	1.99095	0.00714401
Gm42793	predicted gene 42793 [Source:MGI Symbol;Acc:MGI:5662930]	3.89927	1.9632	3.89077e-05
B230334C09Rik	RIKEN cDNA B230334C09 gene [Source:MGI Symbol;Acc:MGI:2442224]	3.84812	1.94415	0.0149573
Fgf4	fibroblast growth factor 4 [Source:MGI Symbol;Acc:MGI:95518]	3.68904	1.88325	0.0230588
Xist	inactive X specific transcripts [Source:MGI Symbol;Acc:MGI:98974]	3.65983	1.87178	0.0268423
Gm48784	predicted gene, 48784 [Source:MGI Symbol;Acc:MGI:6098483]	3.52337	1.81695	0.0270558
Mgam	maltase-glucoamylase [Source:MGI Symbol;Acc:MGI:1203495]	3.50152	1.80798	0.0436981
Slc36a1os	solute carrier family 36 (proton/amino acid symporter), member 1, opposite strand [Source:MGI Symbol;Acc:MGI:1921295]	3.44078	1.78274	0.0442581
Rnf207	ring finger protein 207 [Source:MGI Symbol;Acc:MGI:2684989]	3.39023	1.76138	0.0391785
Gm4468	predicted gene 4468 [Source:MGI Symbol;Acc:MGI:3782652]	3.36672	1.75134	0.00303872
9630010A21Rik	RIKEN cDNA 9630010A21 gene [Source:MGI Symbol;Acc:MGI:2442787]	3.35025	1.74427	0.000742885
Gm48114	predicted gene, 48114 [Source:MGI Symbol;Acc:MGI:6097467]	3.30819	1.72604	0.00328747
Pmp22	peripheral myelin protein 22 [Source:MGI Symbol;Acc:MGI:97631]	3.20756	1.68148	4.50637e-09
Gm45203	predicted gene 45203 [Source:MGI Symbol;Acc:MGI:5753779]	3.13226	1.64721	0.0418519
Nrxn3	neurexin III [Source:MGI Symbol;Acc:MGI:1096389]	3.13191	1.64704	0.00058371
Mpz	myelin protein zero [Source:MGI Symbol;Acc:MGI:103177]	3.12463	1.64368	0.000460663
Arg1	arginase, liver [Source:MGI Symbol;Acc:MGI:88070]	3.06762	1.61712	3.13286e-06
Trem1	triggering receptor expressed on myeloid cells 1 [Source:MGI Symbol;Acc:MGI:1930005]	3.02223	1.59561	0.0380855
Pmp2	peripheral myelin protein 2 [Source:MGI Symbol;Acc:MGI:102667]	3.0149	1.59211	2.63875e-14
Fam107a	family with sequence similarity 107, member A [Source:MGI Symbol;Acc:MGI:3041256]	2.95003	1.56073	3.78637e-06
Lrtm2	leucine-rich repeats and transmembrane domains 2 [Source:MGI Symbol;Acc:MGI:2141485]	2.94158	1.55659	0.000100398
Gramd2	GRAM domain containing 2 [Source:MGI Symbol;Acc:MGI:3528937]	2.93562	1.55367	0.0136595
Insyn2a	inhibitory synaptic factor 2A [Source:MGI Symbol;Acc:MGI:3605068]	2.9261	1.54898	0.00523442
Gm35940	predicted gene, 35940 [Source:MGI Symbol;Acc:MGI:5595099]	2.87976	1.52595	0.0221596
Gm12530	predicted gene 12530 [Source:MGI Symbol;Acc:MGI:3651546]	2.87733	1.52473	2.55025e-07
Pla2g5	phospholipase A2, group V [Source:MGI Symbol;Acc:MGI:101899]	2.86966	1.52088	0.000193733
Ildr1	immunoglobulin-like domain containing receptor 1 [Source:MGI Symbol;Acc:MGI:2146574]	2.8194	1.49539	0.0259859
Gm43813	predicted gene 43813 [Source:MGI Symbol;Acc:MGI:5663950]	2.78039	1.47528	0.0369699
Cfap100	cilia and flagella associated protein 100 [Source:MGI Symbol;Acc:MGI:2141635]	2.77551	1.47275	0.0012088
Nptx2	neuronal pentraxin 2 [Source:MGI Symbol;Acc:MGI:1858209]	2.76317	1.46632	0.000449011
Foxi2	forkhead box I2 [Source:MGI Symbol;Acc:MGI:3028075]	2.74506	1.45684	0.0188382
Cndp1	carnosine dipeptidase 1 (metallopeptidase M20 family) [Source:MGI Symbol;Acc:MGI:2451097]	2.74073	1.45456	6.83878e-07
Fdps	farnesyl diphosphate synthetase [Source:MGI Symbol;Acc:MGI:104888]	2.73035	1.44908	6.69624e-11
Idi1	isopentenyl-diphosphate delta isomerase [Source:MGI Symbol;Acc:MGI:2442264]	2.72013	1.44368	3.10884e-10
Fosl1	fos-like antigen 1 [Source:MGI Symbol;Acc:MGI:107179]	2.71641	1.4417	0.0132829
Aldoc	aldolase C, fructose-bisphosphate [Source:MGI Symbol;Acc:MGI:101863]	2.70824	1.43736	0.00382188
Dhcr24	24-dehydrocholesterol reductase [Source:MGI Symbol;Acc:MGI:1922004]	2.68989	1.42755	3.80695e-05
Ldlr	low density lipoprotein receptor [Source:MGI Symbol;Acc:MGI:96765]	2.67925	1.42183	4.58556e-06
Hmgcr	3-hydroxy-3-methylglutaryl-Coenzyme A reductase [Source:MGI Symbol;Acc:MGI:96159]	2.67295	1.41843	4.61198e-15
2510017J16Rik	RIKEN cDNA 2510017J16 gene [Source:MGI Symbol;Acc:MGI:1913824]	2.66528	1.41429	0.0146644
Pdzph1	PDZ and pleckstrin homology domains 1 [Source:MGI Symbol;Acc:MGI:1916489]	2.64894	1.40541	0.0027722
Gm45809	predicted gene 45809 [Source:MGI Symbol;Acc:MGI:5804924]	2.6359	1.39829	0.0192739
Dhrs2	dehydrogenase/reductase member 2 [Source:MGI Symbol;Acc:MGI:1918662]	2.63318	1.39681	0.0012614
Hbegf	heparin-binding EGF-like growth factor [Source:MGI Symbol;Acc:MGI:96070]	2.60522	1.3814	2.15911e-14
3110080O07Rik	RIKEN cDNA 3110080O07 gene [Source:MGI Symbol;Acc:MGI:1920491]	2.58692	1.37124	0.00365036
Cnih3	cornichon family AMPA receptor auxiliary protein 3 [Source:MGI Symbol;Acc:MGI:1920228]	2.56301	1.35784	0.00328747
Msmo1	methylsterol monoxygenase 1 [Source:MGI Symbol;Acc:MGI:1913484]	2.55981	1.35604	1.64639e-15
Gm26736	predicted gene, 26736 [Source:MGI Symbol;Acc:MGI:5477230]	2.54547	1.34793	0.0232488
Mfsd2a	major facilitator superfamily domain containing 2A [Source:MGI Symbol;Acc:MGI:1923824]	2.53311	1.34091	8.49477e-05
Gm45532	predicted gene 45532 [Source:MGI Symbol;Acc:MGI:5791368]	2.52542	1.33652	0.0494554
Gm45694	predicted gene 45694 [Source:MGI Symbol;Acc:MGI:5804809]	2.50106	1.32254	0.0301
Prx	periaxin [Source:MGI Symbol;Acc:MGI:108176]	2.47712	1.30867	0.00308978
Cyp51	cytochrome P450, family 51 [Source:MGI Symbol;Acc:MGI:106040]	2.46396	1.30098	6.48451e-18
Gm19409	predicted gene, 19409 [Source:MGI Symbol;Acc:MGI:5011594]	2.4611	1.29931	0.0367305
Gm37474	predicted gene, 37474 [Source:MGI Symbol;Acc:MGI:5610702]	2.44907	1.29223	0.00510568
Gm13054	predicted gene 13054 [Source:MGI Symbol;Acc:MGI:3702728]	2.43928	1.28646	0.0330987
Gm1141	predicted gene 1141 [Source:MGI Symbol;Acc:MGI:2685987]	2.43707	1.28515	0.0214455
Gm42432	predicted gene 42432 [Source:MGI Symbol;Acc:MGI:5662569]	2.43664	1.28489	0.00254506
Cyb5r2	cytochrome b5 reductase 2 [Source:MGI Symbol;Acc:MGI:2444415]	2.43203	1.28216	0.000408573
Lss	lanosterol synthase [Source:MGI Symbol;Acc:MGI:1336155]	2.42853	1.28008	3.24298e-12
9130024F11Rik	RIKEN cDNA 9130024F11 gene [Source:MGI Symbol;Acc:MGI:1926150]	2.42424	1.27753	0.0389284
Fam178b	family with sequence similarity 178, member B [Source:MGI Symbol;Acc:MGI:3026913]	2.42377	1.27725	0.00375507
Sptbn5	spectrin beta, non-erythrocytic 5 [Source:MGI Symbol;Acc:MGI:2685200]	2.41816	1.27391	0.00802934
Tm7sf2	transmembrane 7 superfamily member 2 [Source:MGI Symbol;Acc:MGI:1920416]	2.41495	1.27199	6.50244e-05
Frrs1l	ferric-chelate reductase 1 like [Source:MGI Symbol;Acc:MGI:2442704]	2.4065	1.26693	0.00304622
Sqle	squalene epoxidase [Source:MGI Symbol;Acc:MGI:109296]	2.39642	1.26088	1.36081e-13
Hipk4	homeodomain interacting protein kinase 4 [Source:MGI Symbol;Acc:MGI:2685008]	2.38115	1.25166	0.0138042
Kif19a	kinesin family member 19A [Source:MGI Symbol;Acc:MGI:2447024]	2.37704	1.24917	0.0133442
Tll2	tolloid-like 2 [Source:MGI Symbol;Acc:MGI:1346044]	2.37252	1.24642	0.0371799
Nptx1	neuronal pentraxin 1 [Source:MGI Symbol;Acc:MGI:107811]	2.37238	1.24633	0.00444642
Gm47445	predicted gene, 47445 [Source:MGI Symbol;Acc:MGI:6096399]	2.36775	1.24352	0.00759572
Tnfrsf25	tumor necrosis factor receptor superfamily, member 25 [Source:MGI Symbol;Acc:MGI:1934667]	2.36513	1.24192	0.00572226
Hmga2	high mobility group AT-hook 2 [Source:MGI Symbol;Acc:MGI:101761]	2.36079	1.23927	0.00412466
Ugt8a	UDP galactosyltransferase 8A [Source:MGI Symbol;Acc:MGI:109522]	2.35916	1.23827	0.000422375
Gm29811	predicted gene, 29811 [Source:MGI Symbol;Acc:MGI:5588970]	2.35615	1.23643	0.0264679
Hmgcs1	3-hydroxy-3-methylglutaryl-Coenzyme A synthase 1 [Source:MGI Symbol;Acc:MGI:107592]	2.34249	1.22804	1.46417e-13
Gpr37l1	G protein-coupled receptor 37-like 1 [Source:MGI Symbol;Acc:MGI:1928503]	2.33059	1.22069	6.92911e-07
Lcn2	lipocalin 2 [Source:MGI Symbol;Acc:MGI:96757]	2.31815	1.21297	0.0187862
B230303O12Rik	RIKEN cDNA B230303O12 gene [Source:MGI Symbol;Acc:MGI:2442644]	2.29805	1.20041	0.0185986
Cdh1	cadherin 1 [Source:MGI Symbol;Acc:MGI:88354]	2.29739	1.2	1.12833e-06
Mvd	mevalonate (diphospho) decarboxylase [Source:MGI Symbol;Acc:MGI:2179327]	2.29719	1.19987	2.51637e-05
Ncmap	noncompact myelin associated protein [Source:MGI Symbol;Acc:MGI:2444888]	2.28608	1.19287	0.0197117
Scg5	secretogranin V [Source:MGI Symbol;Acc:MGI:98289]	2.27768	1.18757	0.0203912
Gm37666	predicted gene, 37666 [Source:MGI Symbol;Acc:MGI:5610894]	2.2679	1.18136	0.0312985
A330069K06Rik	RIKEN cDNA A330069K06 gene [Source:MGI Symbol;Acc:MGI:2685464]	2.26736	1.18102	0.000110948
Gm19938	predicted gene, 19938 [Source:MGI Symbol;Acc:MGI:5012123]	2.26173	1.17743	0.00767201
Adgb	androglobin [Source:MGI Symbol;Acc:MGI:3605549]	2.22979	1.1569	0.000405306
Fam57a	family with sequence similarity 57, member A [Source:MGI Symbol;Acc:MGI:2151840]	2.22591	1.1544	0.000163741
Il11	interleukin 11 [Source:MGI Symbol;Acc:MGI:107613]	2.21664	1.14837	0.0026338
Fdft1	farnesyl diphosphate farnesyl transferase 1 [Source:MGI Symbol;Acc:MGI:102706]	2.21445	1.14695	4.61198e-15
Gm48653	predicted gene, 48653 [Source:MGI Symbol;Acc:MGI:6098263]	2.20768	1.14253	0.0230588
Cldn19	claudin 19 [Source:MGI Symbol;Acc:MGI:3033992]	2.20255	1.13917	0.00244088
Smco3	single-pass membrane protein with coiled-coil domains 3 [Source:MGI Symbol;Acc:MGI:2443451]	2.19276	1.13275	0.00687636
Gm42515	predicted gene 42515 [Source:MGI Symbol;Acc:MGI:5662652]	2.19166	1.13202	0.0283776
Gm37452	predicted gene, 37452 [Source:MGI Symbol;Acc:MGI:5610680]	2.18836	1.12985	0.0444112
Gm38157	predicted gene, 38157 [Source:MGI Symbol;Acc:MGI:5611385]	2.17731	1.12255	0.0469157
Nrg1	neuregulin 1 [Source:MGI Symbol;Acc:MGI:96083]	2.17665	1.12211	1.31298e-05
Elovl6	ELOVL family member 6, elongation of long chain fatty acids (yeast) [Source:MGI Symbol;Acc:MGI:2156528]	2.17147	1.11867	6.42651e-06
Nefm	neurofilament, medium polypeptide [Source:MGI Symbol;Acc:MGI:97314]	2.17046	1.118	3.80695e-05
Scn3b	sodium channel, voltage-gated, type III, beta [Source:MGI Symbol;Acc:MGI:1918882]	2.16912	1.11711	9.00456e-07
Ucn2	urocortin 2 [Source:MGI Symbol;Acc:MGI:2176375]	2.16871	1.11684	0.0490684
Gm37033	predicted gene, 37033 [Source:MGI Symbol;Acc:MGI:5610261]	2.15221	1.10582	0.00143429
Gm38366	predicted gene, 38366 [Source:MGI Symbol;Acc:MGI:5611594]	2.14753	1.10268	0.0231208
Plekha7	pleckstrin homology domain containing, family A member 7 [Source:MGI Symbol;Acc:MGI:2445094]	2.14667	1.1021	5.3016e-05
Drp2	dystrophin related protein 2 [Source:MGI Symbol;Acc:MGI:107432]	2.13421	1.0937	0.000112894
Stmn3	stathmin-like 3 [Source:MGI Symbol;Acc:MGI:1277137]	2.13304	1.09291	0.026741
C130071C03Rik	RIKEN cDNA C130071C03 gene [Source:MGI Symbol;Acc:MGI:2443574]	2.1308	1.09139	0.0136113
Gm15708	predicted gene 15708 [Source:MGI Symbol;Acc:MGI:3783149]	2.12792	1.08945	0.0472745
Gm50490	predicted gene, 50490 [Source:MGI Symbol;Acc:MGI:6324767]	2.11859	1.08311	0.0370803
Gm43162	predicted gene 43162 [Source:MGI Symbol;Acc:MGI:5663299]	2.11813	1.08279	0.0124954
B130021K23Rik	RIKEN cDNA B130021K23 gene [Source:MGI Symbol;Acc:MGI:2442518]	2.10617	1.07462	0.0469271
Mal	myelin and lymphocyte protein, T cell differentiation protein [Source:MGI Symbol;Acc:MGI:892970]	2.09899	1.06969	5.3016e-05
NA	NA	2.09086	1.0641	0.0188382
1810006J02Rik	RIKEN cDNA 1810006J02 gene [Source:MGI Symbol;Acc:MGI:1916280]	2.08526	1.06023	0.0365336
Gm38162	predicted gene, 38162 [Source:MGI Symbol;Acc:MGI:5611390]	2.08276	1.05849	0.00787397
Crabp1	cellular retinoic acid binding protein I [Source:MGI Symbol;Acc:MGI:88490]	2.08192	1.05791	0.000422375
Gm20597	predicted gene, 20597 [Source:MGI Symbol;Acc:MGI:5295703]	2.08107	1.05733	5.3016e-05
Vat1l	vesicle amine transport protein 1 like [Source:MGI Symbol;Acc:MGI:2142534]	2.07412	1.0525	0.000888379
Gm48146	predicted gene, 48146 [Source:MGI Symbol;Acc:MGI:6097513]	2.06385	1.04534	0.0431875
Gm37606	predicted gene, 37606 [Source:MGI Symbol;Acc:MGI:5610834]	2.05842	1.04154	0.0265814
Pcyt2	phosphate cytidylyltransferase 2, ethanolamine [Source:MGI Symbol;Acc:MGI:1915921]	2.05618	1.03996	5.0506e-08
Chst2	carbohydrate sulfotransferase 2 [Source:MGI Symbol;Acc:MGI:1891160]	2.05271	1.03753	0.0435957
Gm8378	predicted gene 8378 [Source:MGI Symbol;Acc:MGI:3646777]	2.05112	1.03641	0.0484174
Rimklb	ribosomal modification protein rimK-like family member B [Source:MGI Symbol;Acc:MGI:1918325]	2.03859	1.02757	0.000265816
Gm28043	predicted gene, 28043 [Source:MGI Symbol;Acc:MGI:5547779]	2.02999	1.02147	0.0367768
3110045C21Rik	RIKEN cDNA 3110045C21 gene [Source:MGI Symbol;Acc:MGI:1914553]	2.02676	1.01918	0.0230862
Gm36356	predicted gene, 36356 [Source:MGI Symbol;Acc:MGI:5595515]	2.02054	1.01474	0.0351552
Sostdc1	sclerostin domain containing 1 [Source:MGI Symbol;Acc:MGI:1913292]	2.01631	1.01172	1.06462e-07
Ephb6	Eph receptor B6 [Source:MGI Symbol;Acc:MGI:1096338]	2.00236	1.0017	0.00211654
Mag	myelin-associated glycoprotein [Source:MGI Symbol;Acc:MGI:96912]	1.99857	0.998971	0.00140286
Gjb1	gap junction protein, beta 1 [Source:MGI Symbol;Acc:MGI:95719]	1.99581	0.996978	5.43399e-05
Elovl4	elongation of very long chain fatty acids (FEN1/Elo2, SUR4/Elo3, yeast)-like 4 [Source:MGI Symbol;Acc:MGI:1933331]	1.99264	0.994681	0.00247975
Gm42462	predicted gene 42462 [Source:MGI Symbol;Acc:MGI:5662599]	1.98142	0.986532	0.0134505
Ankle1	ankyrin repeat and LEM domain containing 1 [Source:MGI Symbol;Acc:MGI:1918775]	1.98028	0.985703	0.0277516
Rnf128	ring finger protein 128 [Source:MGI Symbol;Acc:MGI:1914139]	1.97927	0.984972	6.42651e-06
Inka2	inka box actin regulator 2 [Source:MGI Symbol;Acc:MGI:1923497]	1.97351	0.98076	1.23326e-07
Hsd17b7	hydroxysteroid (17-beta) dehydrogenase 7 [Source:MGI Symbol;Acc:MGI:1330808]	1.96956	0.97787	5.84822e-12
Cadm3	cell adhesion molecule 3 [Source:MGI Symbol;Acc:MGI:2137858]	1.96849	0.977088	0.0109656
Egfl8	EGF-like domain 8 [Source:MGI Symbol;Acc:MGI:1932094]	1.95584	0.967787	6.40917e-06
Adcy1	adenylate cyclase 1 [Source:MGI Symbol;Acc:MGI:99677]	1.9469	0.96118	0.034222
Chdh	choline dehydrogenase [Source:MGI Symbol;Acc:MGI:1860776]	1.93662	0.953543	0.0114298
AI115009	expressed sequence AI115009 [Source:MGI Symbol;Acc:MGI:2139623]	1.93165	0.949833	0.0153542
Panct2	pluripotency-associated noncoding transcript 2 [Source:MGI Symbol;Acc:MGI:3643517]	1.92613	0.945702	0.0437103
Kif5c	kinesin family member 5C [Source:MGI Symbol;Acc:MGI:1098269]	1.9249	0.944787	0.000112894
Cadm2	cell adhesion molecule 2 [Source:MGI Symbol;Acc:MGI:2442722]	1.9061	0.930623	5.30267e-06
Crabp2	cellular retinoic acid binding protein II [Source:MGI Symbol;Acc:MGI:88491]	1.90476	0.929608	0.00293742
Nefl	neurofilament, light polypeptide [Source:MGI Symbol;Acc:MGI:97313]	1.90405	0.929075	0.0177668
Lcat	lecithin cholesterol acyltransferase [Source:MGI Symbol;Acc:MGI:96755]	1.88516	0.914688	0.0385982
Nr4a1	nuclear receptor subfamily 4, group A, member 1 [Source:MGI Symbol;Acc:MGI:1352454]	1.88492	0.914506	0.000319598
C130089K02Rik	RIKEN cDNA C130089K02 gene [Source:MGI Symbol;Acc:MGI:2444420]	1.88393	0.913747	0.0303425
Lctl	lactase-like [Source:MGI Symbol;Acc:MGI:2183549]	1.88196	0.912234	0.000640469
Ctnnal1	catenin (cadherin associated protein), alpha-like 1 [Source:MGI Symbol;Acc:MGI:1859649]	1.87423	0.906295	9.73751e-05
Bean1	brain expressed, associated with Nedd4, 1 [Source:MGI Symbol;Acc:MGI:1929597]	1.87133	0.904063	0.0383843
Cnmd	chondromodulin [Source:MGI Symbol;Acc:MGI:1341171]	1.86675	0.900525	0.0245588
Sc5d	sterol-C5-desaturase [Source:MGI Symbol;Acc:MGI:1353611]	1.86666	0.900457	1.37858e-10
Fam169a	family with sequence similarity 169, member A [Source:MGI Symbol;Acc:MGI:2444268]	1.86616	0.900074	0.0015893
NA	NA	1.86116	0.896199	0.0397752
Hmox1	heme oxygenase 1 [Source:MGI Symbol;Acc:MGI:96163]	1.85122	0.888474	4.39164e-05
Lrrtm2	leucine rich repeat transmembrane neuronal 2 [Source:MGI Symbol;Acc:MGI:2389174]	1.84842	0.886289	0.00296873
Rasgef1c	RasGEF domain family, member 1C [Source:MGI Symbol;Acc:MGI:1921813]	1.84663	0.884898	0.00360809
Tmprss5	transmembrane protease, serine 5 (spinesin) [Source:MGI Symbol;Acc:MGI:1933407]	1.84457	0.883288	0.0388144
Kcnj10	potassium inwardly-rectifying channel, subfamily J, member 10 [Source:MGI Symbol;Acc:MGI:1194504]	1.84309	0.882125	0.0270556
Ciart	circadian associated repressor of transcription [Source:MGI Symbol;Acc:MGI:2684975]	1.83528	0.875998	0.00923541
Ackr1	atypical chemokine receptor 1 (Duffy blood group) [Source:MGI Symbol;Acc:MGI:1097689]	1.82984	0.871716	5.12066e-05
Tmem189	transmembrane protein 189 [Source:MGI Symbol;Acc:MGI:2142624]	1.82595	0.868651	0.00314395
Fxyd3	FXYD domain-containing ion transport regulator 3 [Source:MGI Symbol;Acc:MGI:107497]	1.82042	0.864275	1.55545e-05
Egr2	early growth response 2 [Source:MGI Symbol;Acc:MGI:95296]	1.82024	0.864127	0.00476442
Cmtm5	CKLF-like MARVEL transmembrane domain containing 5 [Source:MGI Symbol;Acc:MGI:2447164]	1.81895	0.863106	0.0320629
Tmem179	transmembrane protein 179 [Source:MGI Symbol;Acc:MGI:2144891]	1.81458	0.859635	0.0446357
Otop1	otopetrin 1 [Source:MGI Symbol;Acc:MGI:2388363]	1.80527	0.852214	0.0303425
Srd5a1	steroid 5 alpha-reductase 1 [Source:MGI Symbol;Acc:MGI:98400]	1.80495	0.851959	0.000594319
Gm40309	predicted gene, 40309 [Source:MGI Symbol;Acc:MGI:5623194]	1.80403	0.851221	0.0456202
Acsl3	acyl-CoA synthetase long-chain family member 3 [Source:MGI Symbol;Acc:MGI:1921455]	1.80015	0.848115	1.33909e-07
Gpr75	G protein-coupled receptor 75 [Source:MGI Symbol;Acc:MGI:2441843]	1.78765	0.838068	0.0350225
Gm14443	predicted gene 14443 [Source:MGI Symbol;Acc:MGI:3652324]	1.78354	0.834744	0.0330813
Gm13403	predicted gene 13403 [Source:MGI Symbol;Acc:MGI:3649380]	1.78137	0.832987	0.0351225
Ccn4	cellular communication network factor 4 [Source:MGI Symbol;Acc:MGI:1197008]	1.7783	0.830502	0.00296873
Mt2	metallothionein 2 [Source:MGI Symbol;Acc:MGI:97172]	1.77659	0.829108	0.000356777
Kcnj12	potassium inwardly-rectifying channel, subfamily J, member 12 [Source:MGI Symbol;Acc:MGI:108495]	1.77589	0.828541	0.00481511
Gm37827	predicted gene, 37827 [Source:MGI Symbol;Acc:MGI:5611055]	1.77295	0.82615	0.024094
Gm36944	predicted gene, 36944 [Source:MGI Symbol;Acc:MGI:5610172]	1.7725	0.825788	0.0442581
Lgi1	leucine-rich repeat LGI family, member 1 [Source:MGI Symbol;Acc:MGI:1861691]	1.7724	0.825704	0.000973564
Malat1	metastasis associated lung adenocarcinoma transcript 1 (non-coding RNA) [Source:MGI Symbol;Acc:MGI:1919539]	1.77147	0.824948	0.000197553
Slc36a2	solute carrier family 36 (proton/amino acid symporter), member 2 [Source:MGI Symbol;Acc:MGI:1891430]	1.76864	0.822637	0.00134473
Nsg2	neuron specific gene family member 2 [Source:MGI Symbol;Acc:MGI:1202070]	1.76674	0.821087	0.0393277
Acrbp	proacrosin binding protein [Source:MGI Symbol;Acc:MGI:1859515]	1.76431	0.819106	0.0295343
Limch1	LIM and calponin homology domains 1 [Source:MGI Symbol;Acc:MGI:1924819]	1.7642	0.819016	0.000117253
Krtcap3	keratinocyte associated protein 3 [Source:MGI Symbol;Acc:MGI:1917065]	1.7534	0.810156	0.0433498
Elovl7	ELOVL family member 7, elongation of long chain fatty acids (yeast) [Source:MGI Symbol;Acc:MGI:1921809]	1.74869	0.806276	0.00775266
Fxyd7	FXYD domain-containing ion transport regulator 7 [Source:MGI Symbol;Acc:MGI:1889006]	1.74127	0.800138	0.00411372
Gpr137c	G protein-coupled receptor 137C [Source:MGI Symbol;Acc:MGI:1917963]	1.73626	0.795985	0.00307492
Prox2os	prospero homeobox 2 opposite strand [Source:MGI Symbol;Acc:MGI:5011542]	1.73499	0.794928	0.0444063
Sema6d	sema domain, transmembrane domain (TM), and cytoplasmic domain, (semaphorin) 6D [Source:MGI Symbol;Acc:MGI:2387661]	1.73034	0.791058	0.000515828
Syt4	synaptotagmin IV [Source:MGI Symbol;Acc:MGI:101759]	1.73024	0.79097	0.00449592
Pdgfa	platelet derived growth factor, alpha [Source:MGI Symbol;Acc:MGI:97527]	1.72962	0.790459	0.000193733
Stard4	StAR-related lipid transfer (START) domain containing 4 [Source:MGI Symbol;Acc:MGI:2156764]	1.72876	0.789741	1.3445e-10
Cabp1	calcium binding protein 1 [Source:MGI Symbol;Acc:MGI:1352750]	1.72728	0.788505	0.0022927
St8sia5	ST8 alpha-N-acetyl-neuraminide alpha-2,8-sialyltransferase 5 [Source:MGI Symbol;Acc:MGI:109243]	1.72636	0.787735	0.0086014
Slitrk2	SLIT and NTRK-like family, member 2 [Source:MGI Symbol;Acc:MGI:2679449]	1.72557	0.787073	0.00524662
Prrg3	proline rich Gla (G-carboxyglutamic acid) 3 (transmembrane) [Source:MGI Symbol;Acc:MGI:2685214]	1.7225	0.784504	0.000770185
Adamts20	a disintegrin-like and metallopeptidase (reprolysin type) with thrombospondin type 1 motif, 20 [Source:MGI Symbol;Acc:MGI:2660628]	1.71282	0.776373	0.0480104
Lrrn3	leucine rich repeat protein 3, neuronal [Source:MGI Symbol;Acc:MGI:106036]	1.70937	0.773467	0.00985914
Frmd3	FERM domain containing 3 [Source:MGI Symbol;Acc:MGI:2442466]	1.70685	0.77134	1.31532e-05
Erbb4	erb-b2 receptor tyrosine kinase 4 [Source:MGI Symbol;Acc:MGI:104771]	1.70292	0.768012	0.00539913
Magix	MAGI family member, X-linked [Source:MGI Symbol;Acc:MGI:1859644]	1.69827	0.764068	0.00730244
E230020A03Rik	RIKEN cDNA E230020A03 gene [Source:MGI Symbol;Acc:MGI:2442139]	1.69396	0.760402	0.025636
Gm19744	predicted gene, 19744 [Source:MGI Symbol;Acc:MGI:5011929]	1.69177	0.75853	0.025597
Spp1	secreted phosphoprotein 1 [Source:MGI Symbol;Acc:MGI:98389]	1.69176	0.758522	2.14441e-05
Gm37968	predicted gene, 37968 [Source:MGI Symbol;Acc:MGI:5611196]	1.68082	0.749164	0.0417619
A730011C13Rik	RIKEN cDNA A730011C13 gene [Source:MGI Symbol;Acc:MGI:2442973]	1.68021	0.748642	0.0319274
Rdh10	retinol dehydrogenase 10 (all-trans) [Source:MGI Symbol;Acc:MGI:1924238]	1.67739	0.746221	0.00233237
Tesk2	testis-specific kinase 2 [Source:MGI Symbol;Acc:MGI:2385204]	1.67552	0.744612	0.011181
Mir100hg	Mir100 Mirlet7a-2 Mir125b-1 cluster host gene [Source:MGI Symbol;Acc:MGI:1920394]	1.67366	0.743003	0.000144356
Metrnl	meteorin, glial cell differentiation regulator-like [Source:MGI Symbol;Acc:MGI:2384806]	1.6727	0.742182	6.94695e-06
Gm17396	predicted gene, 17396 [Source:MGI Symbol;Acc:MGI:4937030]	1.67162	0.741249	0.0299831
Mlip	muscular LMNA-interacting protein [Source:MGI Symbol;Acc:MGI:1916892]	1.67106	0.740765	0.00206995
Insig1	insulin induced gene 1 [Source:MGI Symbol;Acc:MGI:1916289]	1.67085	0.740582	0.0023815
Dio2	deiodinase, iodothyronine, type II [Source:MGI Symbol;Acc:MGI:1338833]	1.67056	0.740328	0.00766661
Dhh	desert hedgehog [Source:MGI Symbol;Acc:MGI:94891]	1.66999	0.739837	0.0349272
Dnase1l2	deoxyribonuclease 1-like 2 [Source:MGI Symbol;Acc:MGI:1913955]	1.66676	0.737048	0.0362085
Ptprn	protein tyrosine phosphatase, receptor type, N [Source:MGI Symbol;Acc:MGI:102765]	1.66378	0.734461	0.0314343
A730049H05Rik	RIKEN cDNA A730049H05 gene [Source:MGI Symbol;Acc:MGI:1921766]	1.66335	0.734094	0.0230588
Sphk1	sphingosine kinase 1 [Source:MGI Symbol;Acc:MGI:1316649]	1.66291	0.733708	0.00347057
Uck2	uridine-cytidine kinase 2 [Source:MGI Symbol;Acc:MGI:1931744]	1.66251	0.73336	1.24961e-05
Mboat1	membrane bound O-acyltransferase domain containing 1 [Source:MGI Symbol;Acc:MGI:2387184]	1.65814	0.729567	0.00221126
Epha2	Eph receptor A2 [Source:MGI Symbol;Acc:MGI:95278]	1.65492	0.72676	0.0101755
Piwil4	piwi-like RNA-mediated gene silencing 4 [Source:MGI Symbol;Acc:MGI:3041167]	1.65313	0.725198	0.0401436
Dusp14	dual specificity phosphatase 14 [Source:MGI Symbol;Acc:MGI:1927168]	1.65139	0.723677	0.00485477
Nrn1	neuritin 1 [Source:MGI Symbol;Acc:MGI:1915654]	1.64751	0.720287	0.000185524
Serpinb6b	serine (or cysteine) peptidase inhibitor, clade B, member 6b [Source:MGI Symbol;Acc:MGI:894688]	1.64435	0.717517	7.48792e-06
Aacs	acetoacetyl-CoA synthetase [Source:MGI Symbol;Acc:MGI:1926144]	1.64163	0.715126	4.69321e-05
Gm4117	predicted gene 4117 [Source:MGI Symbol;Acc:MGI:3782293]	1.64078	0.714381	0.0295343
Gldn	gliomedin [Source:MGI Symbol;Acc:MGI:2388361]	1.6402	0.713868	0.0418301
Utp14b	UTP14B small subunit processome component [Source:MGI Symbol;Acc:MGI:2445092]	1.63943	0.713198	8.9701e-06
Cdkn1a	cyclin-dependent kinase inhibitor 1A (P21) [Source:MGI Symbol;Acc:MGI:104556]	1.63774	0.711702	4.84388e-05
Arntl2	aryl hydrocarbon receptor nuclear translocator-like 2 [Source:MGI Symbol;Acc:MGI:2684845]	1.63602	0.710193	0.00140286
Gm37607	predicted gene, 37607 [Source:MGI Symbol;Acc:MGI:5610835]	1.63514	0.709413	0.00980661
Kctd11	potassium channel tetramerisation domain containing 11 [Source:MGI Symbol;Acc:MGI:2448712]	1.63014	0.704999	0.0023207
Il1rap	interleukin 1 receptor accessory protein [Source:MGI Symbol;Acc:MGI:104975]	1.6297	0.704606	2.33031e-05
Ramp3	receptor (calcitonin) activity modifying protein 3 [Source:MGI Symbol;Acc:MGI:1860292]	1.62445	0.69995	0.0465835
Rab39b	RAB39B, member RAS oncogene family [Source:MGI Symbol;Acc:MGI:1915040]	1.62439	0.699896	0.0377986
Ecscr	endothelial cell surface expressed chemotaxis and apoptosis regulator [Source:MGI Symbol;Acc:MGI:1915795]	1.62262	0.698324	1.2134e-07
Slc35f1	solute carrier family 35, member F1 [Source:MGI Symbol;Acc:MGI:2139810]	1.62021	0.696183	0.0190322
1700029J07Rik	RIKEN cDNA 1700029J07 gene [Source:MGI Symbol;Acc:MGI:1916729]	1.61624	0.69264	0.026741
Rasgef1a	RasGEF domain family, member 1A [Source:MGI Symbol;Acc:MGI:1917977]	1.61443	0.691028	0.015379
Bdh1	3-hydroxybutyrate dehydrogenase, type 1 [Source:MGI Symbol;Acc:MGI:1919161]	1.61097	0.687932	0.0100202
Kcnq1ot1	KCNQ1 overlapping transcript 1 [Source:MGI Symbol;Acc:MGI:1926855]	1.61049	0.687497	0.0055648
Csgalnact1	chondroitin sulfate N-acetylgalactosaminyltransferase 1 [Source:MGI Symbol;Acc:MGI:2442354]	1.60743	0.684754	1.40488e-06
Odc1	ornithine decarboxylase, structural 1 [Source:MGI Symbol;Acc:MGI:97402]	1.60742	0.684749	2.85114e-06
Gm37206	predicted gene, 37206 [Source:MGI Symbol;Acc:MGI:5610434]	1.60176	0.679658	0.0239828
Arxes2	adipocyte-related X-chromosome expressed sequence 2 [Source:MGI Symbol;Acc:MGI:1924226]	1.60057	0.678583	0.0485591
Cgref1	cell growth regulator with EF hand domain 1 [Source:MGI Symbol;Acc:MGI:1915817]	1.60022	0.678272	0.000193733
Lgi4	leucine-rich repeat LGI family, member 4 [Source:MGI Symbol;Acc:MGI:2180197]	1.59906	0.677225	0.0451313
Emp2	epithelial membrane protein 2 [Source:MGI Symbol;Acc:MGI:1098726]	1.59706	0.675416	0.000626195
Aif1l	allograft inflammatory factor 1-like [Source:MGI Symbol;Acc:MGI:1919598]	1.5928	0.671563	0.000393911
Aldh1a3	aldehyde dehydrogenase family 1, subfamily A3 [Source:MGI Symbol;Acc:MGI:1861722]	1.5846	0.664119	0.0464553
Shc4	SHC (Src homology 2 domain containing) family, member 4 [Source:MGI Symbol;Acc:MGI:2655364]	1.58364	0.663249	0.009377
Tfrc	transferrin receptor [Source:MGI Symbol;Acc:MGI:98822]	1.58153	0.661318	0.00274063
Cers4	ceramide synthase 4 [Source:MGI Symbol;Acc:MGI:1914510]	1.57874	0.658769	7.66878e-05
Tmem97	transmembrane protein 97 [Source:MGI Symbol;Acc:MGI:1916321]	1.57429	0.654699	0.000503319
Fgf1	fibroblast growth factor 1 [Source:MGI Symbol;Acc:MGI:95515]	1.56894	0.64979	0.000348315
Mt3	metallothionein 3 [Source:MGI Symbol;Acc:MGI:97173]	1.56775	0.648694	0.0384774
Grik2	glutamate receptor, ionotropic, kainate 2 (beta 2) [Source:MGI Symbol;Acc:MGI:95815]	1.56521	0.646356	0.0433559
Elovl1	elongation of very long chain fatty acids (FEN1/Elo2, SUR4/Elo3, yeast)-like 1 [Source:MGI Symbol;Acc:MGI:1858959]	1.5618	0.64321	0.0018824
Arhgap19	Rho GTPase activating protein 19 [Source:MGI Symbol;Acc:MGI:1918335]	1.55843	0.640091	0.00206682
Rxrg	retinoid X receptor gamma [Source:MGI Symbol;Acc:MGI:98216]	1.55839	0.640054	0.00328747
Ado	2-aminoethanethiol (cysteamine) dioxygenase [Source:MGI Symbol;Acc:MGI:2685083]	1.55704	0.638804	0.0264703
Cyp7b1	cytochrome P450, family 7, subfamily b, polypeptide 1 [Source:MGI Symbol;Acc:MGI:104978]	1.55024	0.632495	0.000203167
Spon2	spondin 2, extracellular matrix protein [Source:MGI Symbol;Acc:MGI:1923724]	1.54689	0.629369	0.0352556
Rgcc	regulator of cell cycle [Source:MGI Symbol;Acc:MGI:1913464]	1.54605	0.628588	0.00137119
Gfap	glial fibrillary acidic protein [Source:MGI Symbol;Acc:MGI:95697]	1.5368	0.619931	0.0467723
Dhcr7	7-dehydrocholesterol reductase [Source:MGI Symbol;Acc:MGI:1298378]	1.53516	0.618392	0.00946825
P2ry2	purinergic receptor P2Y, G-protein coupled 2 [Source:MGI Symbol;Acc:MGI:105107]	1.53431	0.617587	0.0478996
Cd9	CD9 antigen [Source:MGI Symbol;Acc:MGI:88348]	1.53399	0.617285	0.0017838
Ndp	Norrie disease (pseudoglioma) (human) [Source:MGI Symbol;Acc:MGI:102570]	1.53143	0.614878	0.0468225
Ttc9	tetratricopeptide repeat domain 9 [Source:MGI Symbol;Acc:MGI:1916730]	1.52621	0.609957	0.0478084
Dynlt1a	dynein light chain Tctex-type 1A [Source:MGI Symbol;Acc:MGI:3807506]	1.5248	0.608617	0.0086014
Frem1	Fras1 related extracellular matrix protein 1 [Source:MGI Symbol;Acc:MGI:2670972]	1.52115	0.605161	0.0270558
Neat1	nuclear paraspeckle assembly transcript 1 (non-protein coding) [Source:MGI Symbol;Acc:MGI:1914211]	1.52064	0.604679	0.0499812
Ddah1	dimethylarginine dimethylaminohydrolase 1 [Source:MGI Symbol;Acc:MGI:1916469]	1.51984	0.603922	0.0133589
Sema5a	sema domain, seven thrombospondin repeats (type 1 and type 1-like), transmembrane domain (TM) and short cytoplasmic domain, (semaphorin) 5A [Source:MGI Symbol;Acc:MGI:107556]	1.51916	0.603272	0.0397752
Bcas1	breast carcinoma amplified sequence 1 [Source:MGI Symbol;Acc:MGI:1924210]	1.51768	0.601865	0.0442043
Diaph3	diaphanous related formin 3 [Source:MGI Symbol;Acc:MGI:1927222]	1.51282	0.597242	5.59304e-05
Tgm1	transglutaminase 1, K polypeptide [Source:MGI Symbol;Acc:MGI:98730]	1.51131	0.595796	0.0292501
Cers2	ceramide synthase 2 [Source:MGI Symbol;Acc:MGI:1924143]	1.5089	0.593501	0.00165405
Fads1	fatty acid desaturase 1 [Source:MGI Symbol;Acc:MGI:1923517]	1.50709	0.591761	0.0415601
Ndfip2	Nedd4 family interacting protein 2 [Source:MGI Symbol;Acc:MGI:1923523]	1.50491	0.589681	0.000427934
Nsdhl	NAD(P) dependent steroid dehydrogenase-like [Source:MGI Symbol;Acc:MGI:1099438]	1.50363	0.588446	0.00148728
Fads2	fatty acid desaturase 2 [Source:MGI Symbol;Acc:MGI:1930079]	1.50299	0.587831	0.0122998
Chka	choline kinase alpha [Source:MGI Symbol;Acc:MGI:107760]	1.50257	0.587432	0.0166652
Rhobtb3	Rho-related BTB domain containing 3 [Source:MGI Symbol;Acc:MGI:1920546]	1.50126	0.586173	0.0151604
Gm43597	predicted gene 43597 [Source:MGI Symbol;Acc:MGI:5663734]	1.50031	0.585257	0.0328038
Samd5	sterile alpha motif domain containing 5 [Source:MGI Symbol;Acc:MGI:2444815]	1.4989	0.5839	0.0124954
Pmvk	phosphomevalonate kinase [Source:MGI Symbol;Acc:MGI:1915853]	1.49794	0.582978	7.26316e-05
Mrm3	mitochondrial rRNA methyltransferase 3 [Source:MGI Symbol;Acc:MGI:1914640]	1.4973	0.582359	0.0295343
Pank1	pantothenate kinase 1 [Source:MGI Symbol;Acc:MGI:1922985]	1.49628	0.581378	0.0190322
Nkain2	Na+/K+ transporting ATPase interacting 2 [Source:MGI Symbol;Acc:MGI:1923447]	1.49514	0.580281	0.00680362
Slc25a37	solute carrier family 25, member 37 [Source:MGI Symbol;Acc:MGI:1914962]	1.49413	0.579307	0.000197553
Sgk1	serum/glucocorticoid regulated kinase 1 [Source:MGI Symbol;Acc:MGI:1340062]	1.49284	0.578056	0.00816638
Zfp280c	zinc finger protein 280C [Source:MGI Symbol;Acc:MGI:2387585]	1.4867	0.572114	0.00165405
Errfi1	ERBB receptor feedback inhibitor 1 [Source:MGI Symbol;Acc:MGI:1921405]	1.48431	0.569792	3.01525e-05
Spag1	sperm associated antigen 1 [Source:MGI Symbol;Acc:MGI:1349387]	1.48342	0.568928	0.0437103
Purb	purine rich element binding protein B [Source:MGI Symbol;Acc:MGI:1338779]	1.48305	0.568564	0.00247777
Sertad1	SERTA domain containing 1 [Source:MGI Symbol;Acc:MGI:1913438]	1.48172	0.567273	0.00339573
Snhg17	small nucleolar RNA host gene 17 [Source:MGI Symbol;Acc:MGI:1915358]	1.47936	0.564971	0.00277051
Acsbg1	acyl-CoA synthetase bubblegum family member 1 [Source:MGI Symbol;Acc:MGI:2385656]	1.47901	0.564632	0.0290866
Znhit6	zinc finger, HIT type 6 [Source:MGI Symbol;Acc:MGI:1916996]	1.47786	0.563508	0.000148929
Tcea2	transcription elongation factor A (SII), 2 [Source:MGI Symbol;Acc:MGI:107368]	1.47768	0.563333	0.0086014
Gm49759	predicted gene, 49759 [Source:MGI Symbol;Acc:MGI:6215263]	1.47481	0.560533	0.00506212
Chl1	cell adhesion molecule L1-like [Source:MGI Symbol;Acc:MGI:1098266]	1.47353	0.559279	0.00876617
NA	NA	1.47127	0.557058	0.0393914
Slc26a11	solute carrier family 26, member 11 [Source:MGI Symbol;Acc:MGI:2444589]	1.46994	0.555755	0.0223416
Acat2	acetyl-Coenzyme A acetyltransferase 2 [Source:MGI Symbol;Acc:MGI:87871]	1.46557	0.551465	0.0149511
Pgs1	phosphatidylglycerophosphate synthase 1 [Source:MGI Symbol;Acc:MGI:1921701]	1.4651	0.551	0.00671051
Rab20	RAB20, member RAS oncogene family [Source:MGI Symbol;Acc:MGI:102789]	1.46012	0.546082	0.00253692
Far1	fatty acyl CoA reductase 1 [Source:MGI Symbol;Acc:MGI:1914670]	1.45888	0.544864	0.000558396
Slc24a2	solute carrier family 24 (sodium/potassium/calcium exchanger), member 2 [Source:MGI Symbol;Acc:MGI:1923626]	1.45817	0.544154	0.0448492
Rdh11	retinol dehydrogenase 11 [Source:MGI Symbol;Acc:MGI:102581]	1.45652	0.54253	6.40917e-06
Fut8	fucosyltransferase 8 [Source:MGI Symbol;Acc:MGI:1858901]	1.45488	0.540901	0.0160398
Faim	Fas apoptotic inhibitory molecule [Source:MGI Symbol;Acc:MGI:1344387]	1.45228	0.538319	0.000197553
Bicd1	BICD cargo adaptor 1 [Source:MGI Symbol;Acc:MGI:1101760]	1.45165	0.537698	0.0230862
Scamp5	secretory carrier membrane protein 5 [Source:MGI Symbol;Acc:MGI:1928948]	1.4505	0.536548	0.0437103
Sult1a1	sulfotransferase family 1A, phenol-preferring, member 1 [Source:MGI Symbol;Acc:MGI:102896]	1.44828	0.534339	0.0446876
Slco3a1	solute carrier organic anion transporter family, member 3a1 [Source:MGI Symbol;Acc:MGI:1351867]	1.44417	0.530236	0.00547133
Dusp18	dual specificity phosphatase 18 [Source:MGI Symbol;Acc:MGI:1922469]	1.44381	0.529881	0.0292142
Pxdc1	PX domain containing 1 [Source:MGI Symbol;Acc:MGI:1914145]	1.44105	0.527117	0.0119434
Tvp23a	trans-golgi network vesicle protein 23A [Source:MGI Symbol;Acc:MGI:3665441]	1.43823	0.524296	0.0371914
Mme	membrane metallo endopeptidase [Source:MGI Symbol;Acc:MGI:97004]	1.43098	0.517007	0.0211285
Ppp1r16b	protein phosphatase 1, regulatory subunit 16B [Source:MGI Symbol;Acc:MGI:2151841]	1.42886	0.514864	0.0411049
Fez1	fasciculation and elongation protein zeta 1 (zygin I) [Source:MGI Symbol;Acc:MGI:2670976]	1.42631	0.512291	0.00333796
St3gal3	ST3 beta-galactoside alpha-2,3-sialyltransferase 3 [Source:MGI Symbol;Acc:MGI:1316659]	1.42597	0.511946	0.0397752
Gcat	glycine C-acetyltransferase (2-amino-3-ketobutyrate-coenzyme A ligase) [Source:MGI Symbol;Acc:MGI:1349389]	1.42558	0.511552	0.00367329
Chn2	chimerin 2 [Source:MGI Symbol;Acc:MGI:1917243]	1.42193	0.507855	0.0243211
Ier3	immediate early response 3 [Source:MGI Symbol;Acc:MGI:104814]	1.4206	0.506501	0.000821313
Gm42547	predicted gene 42547 [Source:MGI Symbol;Acc:MGI:5662684]	1.41578	0.501593	0.0349272
Gab2	growth factor receptor bound protein 2-associated protein 2 [Source:MGI Symbol;Acc:MGI:1333854]	0.706992	-0.500234	0.00222716
Fam217b	family with sequence similarity 217, member B [Source:MGI Symbol;Acc:MGI:1918782]	0.706943	-0.500334	0.0167815
Gpr65	G-protein coupled receptor 65 [Source:MGI Symbol;Acc:MGI:108031]	0.706352	-0.50154	0.0332493
Lfng	LFNG O-fucosylpeptide 3-beta-N-acetylglucosaminyltransferase [Source:MGI Symbol;Acc:MGI:1095413]	0.705992	-0.502276	8.67313e-05
Sulf2	sulfatase 2 [Source:MGI Symbol;Acc:MGI:1919293]	0.704976	-0.504354	0.0350225
Cd48	CD48 antigen [Source:MGI Symbol;Acc:MGI:88339]	0.704371	-0.505592	0.0223706
Kmo	kynurenine 3-monooxygenase (kynurenine 3-hydroxylase) [Source:MGI Symbol;Acc:MGI:2138151]	0.703444	-0.507492	0.0345793
Tnfaip2	tumor necrosis factor, alpha-induced protein 2 [Source:MGI Symbol;Acc:MGI:104960]	0.703065	-0.50827	0.0482588
Sytl2	synaptotagmin-like 2 [Source:MGI Symbol;Acc:MGI:1933366]	0.70306	-0.50828	0.0166652
Hykk	hydroxylysine kinase 1 [Source:MGI Symbol;Acc:MGI:2443139]	0.701805	-0.510858	0.0122062
Herc3	hect domain and RLD 3 [Source:MGI Symbol;Acc:MGI:1921248]	0.701714	-0.511045	0.00341595
Klhl24	kelch-like 24 [Source:MGI Symbol;Acc:MGI:1923035]	0.701077	-0.512355	0.00466511
Cd37	CD37 antigen [Source:MGI Symbol;Acc:MGI:88330]	0.701026	-0.51246	0.0223416
Fnbp1l	formin binding protein 1-like [Source:MGI Symbol;Acc:MGI:1925642]	0.700079	-0.514411	0.00701012
Arl11	ADP-ribosylation factor-like 11 [Source:MGI Symbol;Acc:MGI:2444054]	0.699175	-0.516275	0.00701012
Edem1	ER degradation enhancer, mannosidase alpha-like 1 [Source:MGI Symbol;Acc:MGI:2180139]	0.698551	-0.517563	0.00060459
Rai2	retinoic acid induced 2 [Source:MGI Symbol;Acc:MGI:1344378]	0.697424	-0.519892	0.0412515
Grk3	G protein-coupled receptor kinase 3 [Source:MGI Symbol;Acc:MGI:87941]	0.697339	-0.520069	0.0494554
Pla2g15	phospholipase A2, group XV [Source:MGI Symbol;Acc:MGI:2178076]	0.697288	-0.520172	0.00247975
Epb41l1	erythrocyte membrane protein band 4.1 like 1 [Source:MGI Symbol;Acc:MGI:103010]	0.696756	-0.521274	0.00233237
Tlr6	toll-like receptor 6 [Source:MGI Symbol;Acc:MGI:1341296]	0.696114	-0.522605	0.0274851
Atp2a3	ATPase, Ca++ transporting, ubiquitous [Source:MGI Symbol;Acc:MGI:1194503]	0.695403	-0.524079	0.0152842
Ctsb	cathepsin B [Source:MGI Symbol;Acc:MGI:88561]	0.695189	-0.524524	0.0214455
Tlr5	toll-like receptor 5 [Source:MGI Symbol;Acc:MGI:1858171]	0.69477	-0.525392	0.040221
Etl4	enhancer trap locus 4 [Source:MGI Symbol;Acc:MGI:95454]	0.694742	-0.52545	0.0301
Man2b1	mannosidase 2, alpha B1 [Source:MGI Symbol;Acc:MGI:107286]	0.694505	-0.525943	0.000136456
Samsn1	SAM domain, SH3 domain and nuclear localization signals, 1 [Source:MGI Symbol;Acc:MGI:1914992]	0.69426	-0.526451	0.0277435
Lpxn	leupaxin [Source:MGI Symbol;Acc:MGI:2147677]	0.694256	-0.526461	0.0442875
Lipa	lysosomal acid lipase A [Source:MGI Symbol;Acc:MGI:96789]	0.69362	-0.527783	0.000635076
Fyb	FYN binding protein [Source:MGI Symbol;Acc:MGI:1346327]	0.691719	-0.531742	0.024094
Nckap1l	NCK associated protein 1 like [Source:MGI Symbol;Acc:MGI:1926063]	0.691607	-0.531976	0.034876
Serpinb8	serine (or cysteine) peptidase inhibitor, clade B, member 8 [Source:MGI Symbol;Acc:MGI:894657]	0.6913	-0.532616	0.0206386
Egfr	epidermal growth factor receptor [Source:MGI Symbol;Acc:MGI:95294]	0.691107	-0.533019	0.00631774
Cdk14	cyclin-dependent kinase 14 [Source:MGI Symbol;Acc:MGI:894318]	0.690944	-0.533359	0.0203245
Tmem71	transmembrane protein 71 [Source:MGI Symbol;Acc:MGI:2146049]	0.689977	-0.535381	0.0314849
Chst15	carbohydrate sulfotransferase 15 [Source:MGI Symbol;Acc:MGI:1924840]	0.689606	-0.536157	0.0109829
Dapp1	dual adaptor for phosphotyrosine and 3-phosphoinositides 1 [Source:MGI Symbol;Acc:MGI:1347063]	0.688252	-0.53899	0.0214455
Hoxc10	homeobox C10 [Source:MGI Symbol;Acc:MGI:96192]	0.686887	-0.541855	0.00318375
Pdgfc	platelet-derived growth factor, C polypeptide [Source:MGI Symbol;Acc:MGI:1859631]	0.685939	-0.543849	0.0141011
Cd74	CD74 antigen (invariant polypeptide of major histocompatibility complex, class II antigen-associated) [Source:MGI Symbol;Acc:MGI:96534]	0.684016	-0.547899	0.00262019
Filip1l	filamin A interacting protein 1-like [Source:MGI Symbol;Acc:MGI:1925999]	0.682529	-0.551038	0.0469322
Blnk	B cell linker [Source:MGI Symbol;Acc:MGI:96878]	0.682527	-0.551042	0.0172955
Btk	Bruton agammaglobulinemia tyrosine kinase [Source:MGI Symbol;Acc:MGI:88216]	0.681871	-0.55243	0.0301
Znrf2	zinc and ring finger 2 [Source:MGI Symbol;Acc:MGI:1196246]	0.681462	-0.553296	0.00705855
Dusp4	dual specificity phosphatase 4 [Source:MGI Symbol;Acc:MGI:2442191]	0.68061	-0.555099	0.00142908
Mafb	v-maf musculoaponeurotic fibrosarcoma oncogene family, protein B (avian) [Source:MGI Symbol;Acc:MGI:104555]	0.680241	-0.555883	0.00802669
Dapk1	death associated protein kinase 1 [Source:MGI Symbol;Acc:MGI:1916885]	0.679481	-0.557496	0.0187662
1110019D14Rik	RIKEN cDNA 1110019D14 gene [Source:MGI Symbol;Acc:MGI:1923561]	0.678261	-0.560087	0.0433616
Anxa6	annexin A6 [Source:MGI Symbol;Acc:MGI:88255]	0.677656	-0.561375	0.00346319
Arl4c	ADP-ribosylation factor-like 4C [Source:MGI Symbol;Acc:MGI:2445172]	0.676964	-0.56285	0.00533127
Arsg	arylsulfatase G [Source:MGI Symbol;Acc:MGI:1921258]	0.676932	-0.562917	0.00205145
Kcnj8	potassium inwardly-rectifying channel, subfamily J, member 8 [Source:MGI Symbol;Acc:MGI:1100508]	0.676769	-0.563265	0.0397752
Cdh5	cadherin 5 [Source:MGI Symbol;Acc:MGI:105057]	0.6756	-0.56576	0.0109663
H2-K1	histocompatibility 2, K1, K region [Source:MGI Symbol;Acc:MGI:95904]	0.675548	-0.56587	0.0281524
Tnfrsf1b	tumor necrosis factor receptor superfamily, member 1b [Source:MGI Symbol;Acc:MGI:1314883]	0.675307	-0.566385	0.0394991
Tlr7	toll-like receptor 7 [Source:MGI Symbol;Acc:MGI:2176882]	0.674512	-0.568085	0.0124954
Pfkp	phosphofructokinase, platelet [Source:MGI Symbol;Acc:MGI:1891833]	0.674278	-0.568585	0.0133603
Igf2r	insulin-like growth factor 2 receptor [Source:MGI Symbol;Acc:MGI:96435]	0.67414	-0.568879	0.000129995
Tbc1d16	TBC1 domain family, member 16 [Source:MGI Symbol;Acc:MGI:2652878]	0.673827	-0.56955	0.0132829
Kit	KIT proto-oncogene receptor tyrosine kinase [Source:MGI Symbol;Acc:MGI:96677]	0.67366	-0.569908	0.0265843
Syk	spleen tyrosine kinase [Source:MGI Symbol;Acc:MGI:99515]	0.673079	-0.571152	0.00505879
Fgfr2	fibroblast growth factor receptor 2 [Source:MGI Symbol;Acc:MGI:95523]	0.673017	-0.571285	0.0433616
Ctsd	cathepsin D [Source:MGI Symbol;Acc:MGI:88562]	0.672342	-0.572732	0.00644637
Wls	wntless WNT ligand secretion mediator [Source:MGI Symbol;Acc:MGI:1915401]	0.671975	-0.573521	0.0324225
Dmpk	dystrophia myotonica-protein kinase [Source:MGI Symbol;Acc:MGI:94906]	0.671641	-0.574238	0.00300691
Thbs2	thrombospondin 2 [Source:MGI Symbol;Acc:MGI:98738]	0.671621	-0.57428	0.0487481
Trf	transferrin [Source:MGI Symbol;Acc:MGI:98821]	0.670958	-0.575706	0.00810403
Pik3r5	phosphoinositide-3-kinase regulatory subunit 5 [Source:MGI Symbol;Acc:MGI:2443588]	0.670911	-0.575807	0.0053636
Tmem106a	transmembrane protein 106A [Source:MGI Symbol;Acc:MGI:1922056]	0.670445	-0.576809	2.14441e-05
Tns4	tensin 4 [Source:MGI Symbol;Acc:MGI:2144377]	0.669884	-0.578017	0.0467386
Gbe1	glucan (1,4-alpha-), branching enzyme 1 [Source:MGI Symbol;Acc:MGI:1921435]	0.66987	-0.578047	0.0467723
Mastl	microtubule associated serine/threonine kinase-like [Source:MGI Symbol;Acc:MGI:1914371]	0.668809	-0.580334	0.0140752
Tcaf2	TRPM8 channel-associated factor 2 [Source:MGI Symbol;Acc:MGI:2385258]	0.667988	-0.582105	0.0114055
Myof	myoferlin [Source:MGI Symbol;Acc:MGI:1919192]	0.66729	-0.583615	0.00307492
Vsir	V-set immunoregulatory receptor [Source:MGI Symbol;Acc:MGI:1921298]	0.66699	-0.584264	0.0237851
Pirb	paired Ig-like receptor B [Source:MGI Symbol;Acc:MGI:894311]	0.665786	-0.58687	0.00640128
Cd109	CD109 antigen [Source:MGI Symbol;Acc:MGI:2445221]	0.665232	-0.588069	0.0433498
H2-Ab1	histocompatibility 2, class II antigen A, beta 1 [Source:MGI Symbol;Acc:MGI:103070]	0.664867	-0.588862	0.00787361
Wdr6	WD repeat domain 6 [Source:MGI Symbol;Acc:MGI:1930140]	0.664084	-0.590562	0.00102332
Ormdl3	ORM1-like 3 (S. cerevisiae) [Source:MGI Symbol;Acc:MGI:1913862]	0.663052	-0.592806	0.0229634
Slc22a18	solute carrier family 22 (organic cation transporter), member 18 [Source:MGI Symbol;Acc:MGI:1336884]	0.663013	-0.59289	0.0469775
H2-D1	histocompatibility 2, D region locus 1 [Source:MGI Symbol;Acc:MGI:95896]	0.662898	-0.593142	0.00469009
Palld	palladin, cytoskeletal associated protein [Source:MGI Symbol;Acc:MGI:1919583]	0.662726	-0.593515	0.00403678
Islr	immunoglobulin superfamily containing leucine-rich repeat [Source:MGI Symbol;Acc:MGI:1349645]	0.662299	-0.594445	0.0452837
Rab11fip1	RAB11 family interacting protein 1 (class I) [Source:MGI Symbol;Acc:MGI:1923017]	0.661143	-0.596967	0.0117903
Tbc1d4	TBC1 domain family, member 4 [Source:MGI Symbol;Acc:MGI:2429660]	0.660764	-0.597794	0.00386555
Fgd3	FYVE, RhoGEF and PH domain containing 3 [Source:MGI Symbol;Acc:MGI:1353657]	0.660609	-0.598131	0.00199121
Atp2b4	ATPase, Ca++ transporting, plasma membrane 4 [Source:MGI Symbol;Acc:MGI:88111]	0.659574	-0.600394	0.0123707
Angptl4	angiopoietin-like 4 [Source:MGI Symbol;Acc:MGI:1888999]	0.657252	-0.605481	0.0270558
Gpr160	G protein-coupled receptor 160 [Source:MGI Symbol;Acc:MGI:1919112]	0.656824	-0.606422	0.0314586
Cybb	cytochrome b-245, beta polypeptide [Source:MGI Symbol;Acc:MGI:88574]	0.656487	-0.607161	0.0307963
Fblim1	filamin binding LIM protein 1 [Source:MGI Symbol;Acc:MGI:1921452]	0.655252	-0.609878	0.00134147
Hoxa10	homeobox A10 [Source:MGI Symbol;Acc:MGI:96171]	0.655059	-0.610302	0.0124238
Slc37a2	solute carrier family 37 (glycerol-3-phosphate transporter), member 2 [Source:MGI Symbol;Acc:MGI:1929693]	0.653295	-0.614194	0.00233237
Bcl2a1b	B cell leukemia/lymphoma 2 related protein A1b [Source:MGI Symbol;Acc:MGI:1278326]	0.652306	-0.61638	0.0494169
Krt80	keratin 80 [Source:MGI Symbol;Acc:MGI:1921377]	0.651832	-0.617429	0.0130605
Pltp	phospholipid transfer protein [Source:MGI Symbol;Acc:MGI:103151]	0.651683	-0.617758	0.00143429
Adcy3	adenylate cyclase 3 [Source:MGI Symbol;Acc:MGI:99675]	0.651562	-0.618025	0.0184395
Myo1f	myosin IF [Source:MGI Symbol;Acc:MGI:107711]	0.650685	-0.619968	0.00341595
Acad11	acyl-Coenzyme A dehydrogenase family, member 11 [Source:MGI Symbol;Acc:MGI:2143169]	0.650681	-0.619977	0.0177587
Irf4	interferon regulatory factor 4 [Source:MGI Symbol;Acc:MGI:1096873]	0.650494	-0.620393	0.0497169
Htra3	HtrA serine peptidase 3 [Source:MGI Symbol;Acc:MGI:1925808]	0.649862	-0.621795	0.0290866
H2-Eb1	histocompatibility 2, class II antigen E beta [Source:MGI Symbol;Acc:MGI:95901]	0.649847	-0.621828	0.0205778
Rtn4rl1	reticulon 4 receptor-like 1 [Source:MGI Symbol;Acc:MGI:2661375]	0.649644	-0.622279	0.0391372
Slc7a8	solute carrier family 7 (cationic amino acid transporter, y+ system), member 8 [Source:MGI Symbol;Acc:MGI:1355323]	0.649533	-0.622526	0.00028662
Tmem154	transmembrane protein 154 [Source:MGI Symbol;Acc:MGI:2444725]	0.649169	-0.623335	0.049161
Gm16001	predicted gene 16001 [Source:MGI Symbol;Acc:MGI:3802119]	0.648724	-0.624323	0.0111005
Blvra	biliverdin reductase A [Source:MGI Symbol;Acc:MGI:88170]	0.648255	-0.625367	0.00802254
Ptafr	platelet-activating factor receptor [Source:MGI Symbol;Acc:MGI:106066]	0.647731	-0.626533	0.0484097
Lratd2	LRAT domain containing 1 [Source:MGI Symbol;Acc:MGI:3026924]	0.646772	-0.628671	0.00680362
Rasgrp3	RAS, guanyl releasing protein 3 [Source:MGI Symbol;Acc:MGI:3028579]	0.645914	-0.630586	0.0314989
Lcp2	lymphocyte cytosolic protein 2 [Source:MGI Symbol;Acc:MGI:1321402]	0.645069	-0.632476	0.0380855
Slc41a3	solute carrier family 41, member 3 [Source:MGI Symbol;Acc:MGI:1918949]	0.644732	-0.633228	0.00309167
Cmklr1	chemokine-like receptor 1 [Source:MGI Symbol;Acc:MGI:109603]	0.644677	-0.633352	0.00126092
Cd84	CD84 antigen [Source:MGI Symbol;Acc:MGI:1336885]	0.644175	-0.634475	0.0151287
Pcdhgc3	protocadherin gamma subfamily C, 3 [Source:MGI Symbol;Acc:MGI:1935201]	0.643931	-0.635022	0.0321181
Rps6ka3	ribosomal protein S6 kinase polypeptide 3 [Source:MGI Symbol;Acc:MGI:104557]	0.643625	-0.635708	0.0266163
Prelp	proline arginine-rich end leucine-rich repeat [Source:MGI Symbol;Acc:MGI:2151110]	0.643496	-0.635997	0.0277435
Clec7a	C-type lectin domain family 7, member a [Source:MGI Symbol;Acc:MGI:1861431]	0.643089	-0.63691	0.0131219
Cnnm2	cyclin M2 [Source:MGI Symbol;Acc:MGI:2151054]	0.64295	-0.637222	0.000372177
Wdfy4	WD repeat and FYVE domain containing 4 [Source:MGI Symbol;Acc:MGI:3584510]	0.642576	-0.638061	0.00885758
Tom1l1	target of myb1-like 1 (chicken) [Source:MGI Symbol;Acc:MGI:1919193]	0.642382	-0.638496	0.0125187
L3hypdh	L-3-hydroxyproline dehydratase (trans-) [Source:MGI Symbol;Acc:MGI:1914467]	0.642147	-0.639024	0.0485591
Rrad	Ras-related associated with diabetes [Source:MGI Symbol;Acc:MGI:1930943]	0.641804	-0.639795	0.00816873
Amz1	archaelysin family metallopeptidase 1 [Source:MGI Symbol;Acc:MGI:2442258]	0.641589	-0.640279	0.0183519
Cdyl2	chromodomain protein, Y chromosome-like 2 [Source:MGI Symbol;Acc:MGI:1923046]	0.640841	-0.641962	0.00246737
Fry	FRY microtubule binding protein [Source:MGI Symbol;Acc:MGI:2443895]	0.640389	-0.64298	0.00547133
9930111J21Rik2	RIKEN cDNA 9930111J21 gene 2 [Source:MGI Symbol;Acc:MGI:3711310]	0.640385	-0.642989	0.0162711
Fbxo32	F-box protein 32 [Source:MGI Symbol;Acc:MGI:1914981]	0.640312	-0.643153	0.00424025
Mst1r	macrophage stimulating 1 receptor (c-met-related tyrosine kinase) [Source:MGI Symbol;Acc:MGI:99614]	0.639739	-0.644445	0.0084192
Isoc1	isochorismatase domain containing 1 [Source:MGI Symbol;Acc:MGI:1913557]	0.639516	-0.644948	0.00864895
Adap2	ArfGAP with dual PH domains 2 [Source:MGI Symbol;Acc:MGI:2663075]	0.639443	-0.645112	6.42651e-06
Lyplal1	lysophospholipase-like 1 [Source:MGI Symbol;Acc:MGI:2385115]	0.639416	-0.645173	0.0170989
Cd300ld	CD300 molecule like family member d [Source:MGI Symbol;Acc:MGI:2442358]	0.637814	-0.648791	0.000933593
Dclk1	doublecortin-like kinase 1 [Source:MGI Symbol;Acc:MGI:1330861]	0.637436	-0.649649	0.0408492
Mcam	melanoma cell adhesion molecule [Source:MGI Symbol;Acc:MGI:1933966]	0.636549	-0.651656	0.000812172
H2-Aa	histocompatibility 2, class II antigen A, alpha [Source:MGI Symbol;Acc:MGI:95895]	0.636172	-0.652512	0.0247279
Cyp4f18	cytochrome P450, family 4, subfamily f, polypeptide 18 [Source:MGI Symbol;Acc:MGI:1919304]	0.63585	-0.653243	0.018747
Myo10	myosin X [Source:MGI Symbol;Acc:MGI:107716]	0.635272	-0.654554	3.41181e-06
Cnr2	cannabinoid receptor 2 (macrophage) [Source:MGI Symbol;Acc:MGI:104650]	0.634445	-0.656434	0.0476936
Galm	galactose mutarotase [Source:MGI Symbol;Acc:MGI:2442420]	0.633631	-0.658286	0.00403678
Ticam2	toll-like receptor adaptor molecule 2 [Source:MGI Symbol;Acc:MGI:3040056]	0.632581	-0.660678	0.0397752
Slc4a7	solute carrier family 4, sodium bicarbonate cotransporter, member 7 [Source:MGI Symbol;Acc:MGI:2443878]	0.631636	-0.662835	0.0266916
Dennd4a	DENN/MADD domain containing 4A [Source:MGI Symbol;Acc:MGI:2142979]	0.631533	-0.663069	0.00572226
Zfp185	zinc finger protein 185 [Source:MGI Symbol;Acc:MGI:108095]	0.630437	-0.665575	0.000724442
Fam160a1	family with sequence similarity 160, member A1 [Source:MGI Symbol;Acc:MGI:2444746]	0.630288	-0.665917	0.0274422
Alkal2	ALK and LTK ligand 2 [Source:MGI Symbol;Acc:MGI:3697448]	0.629382	-0.667993	0.0371914
Ms4a7	membrane-spanning 4-domains, subfamily A, member 7 [Source:MGI Symbol;Acc:MGI:1918846]	0.629361	-0.668039	0.00749496
Rbm47	RNA binding motif protein 47 [Source:MGI Symbol;Acc:MGI:2384294]	0.629217	-0.668369	0.00329976
Nek2	NIMA (never in mitosis gene a)-related expressed kinase 2 [Source:MGI Symbol;Acc:MGI:109359]	0.628862	-0.669185	0.0023815
Rap1gap2	RAP1 GTPase activating protein 2 [Source:MGI Symbol;Acc:MGI:3028623]	0.628739	-0.669467	0.00126092
NA	NA	0.62788	-0.671438	0.0306602
Abcc9	ATP-binding cassette, sub-family C (CFTR/MRP), member 9 [Source:MGI Symbol;Acc:MGI:1352630]	0.627553	-0.672191	0.0297266
Clec12a	C-type lectin domain family 12, member a [Source:MGI Symbol;Acc:MGI:3040968]	0.627249	-0.67289	0.0025258
Abcc3	ATP-binding cassette, sub-family C (CFTR/MRP), member 3 [Source:MGI Symbol;Acc:MGI:1923658]	0.625659	-0.676553	8.04786e-05
Lhfpl2	lipoma HMGIC fusion partner-like 2 [Source:MGI Symbol;Acc:MGI:2145236]	0.625433	-0.677072	0.000257348
Astn2	astrotactin 2 [Source:MGI Symbol;Acc:MGI:1889277]	0.625339	-0.67729	0.0203912
Xdh	xanthine dehydrogenase [Source:MGI Symbol;Acc:MGI:98973]	0.624522	-0.679177	0.0116124
Tgfb3	transforming growth factor, beta 3 [Source:MGI Symbol;Acc:MGI:98727]	0.624234	-0.679841	0.0228758
Bcl6b	B cell CLL/lymphoma 6, member B [Source:MGI Symbol;Acc:MGI:1278332]	0.623846	-0.680738	0.0260765
Fzd4	frizzled class receptor 4 [Source:MGI Symbol;Acc:MGI:108520]	0.623811	-0.68082	0.0442581
Cd68	CD68 antigen [Source:MGI Symbol;Acc:MGI:88342]	0.623384	-0.681807	0.000249075
Kctd12b	potassium channel tetramerisation domain containing 12b [Source:MGI Symbol;Acc:MGI:2444667]	0.623368	-0.681843	0.0385049
Ppp2r1b	protein phosphatase 2, regulatory subunit A, beta [Source:MGI Symbol;Acc:MGI:1920949]	0.623114	-0.682432	0.0216088
Arhgap25	Rho GTPase activating protein 25 [Source:MGI Symbol;Acc:MGI:2443687]	0.621808	-0.685459	0.00555194
Ptpn22	protein tyrosine phosphatase, non-receptor type 22 (lymphoid) [Source:MGI Symbol;Acc:MGI:107170]	0.621641	-0.685846	0.0222529
Irf8	interferon regulatory factor 8 [Source:MGI Symbol;Acc:MGI:96395]	0.621541	-0.686079	0.00780198
Ptk2b	PTK2 protein tyrosine kinase 2 beta [Source:MGI Symbol;Acc:MGI:104908]	0.62111	-0.687079	2.89164e-05
Zfp423	zinc finger protein 423 [Source:MGI Symbol;Acc:MGI:1891217]	0.621061	-0.687192	0.00907567
Aff2	AF4/FMR2 family, member 2 [Source:MGI Symbol;Acc:MGI:1202294]	0.620756	-0.687902	0.0465426
Anxa1	annexin A1 [Source:MGI Symbol;Acc:MGI:96819]	0.619725	-0.6903	0.00379124
Aldh1b1	aldehyde dehydrogenase 1 family, member B1 [Source:MGI Symbol;Acc:MGI:1919785]	0.619637	-0.690504	0.0270556
Kif21b	kinesin family member 21B [Source:MGI Symbol;Acc:MGI:109234]	0.618382	-0.69343	0.000193733
Pxdn	peroxidasin [Source:MGI Symbol;Acc:MGI:1916925]	0.618251	-0.693736	0.000551389
Irak2	interleukin-1 receptor-associated kinase 2 [Source:MGI Symbol;Acc:MGI:2429603]	0.61819	-0.693878	6.83878e-07
Mfng	MFNG O-fucosylpeptide 3-beta-N-acetylglucosaminyltransferase [Source:MGI Symbol;Acc:MGI:1095404]	0.617159	-0.696286	0.00624088
Ctss	cathepsin S [Source:MGI Symbol;Acc:MGI:107341]	0.617093	-0.696441	0.0177668
Spc25	SPC25, NDC80 kinetochore complex component, homolog (S. cerevisiae) [Source:MGI Symbol;Acc:MGI:1913692]	0.616662	-0.697449	0.0187399
Prss35	protease, serine 35 [Source:MGI Symbol;Acc:MGI:2444800]	0.616104	-0.698754	0.0154731
Sgsm1	small G protein signaling modulator 1 [Source:MGI Symbol;Acc:MGI:107320]	0.615888	-0.699261	0.0100829
Slc9b2	solute carrier family 9, subfamily B (NHA2, cation proton antiporter 2), member 2 [Source:MGI Symbol;Acc:MGI:2140077]	0.615019	-0.701298	0.024094
Pnck	pregnancy upregulated non-ubiquitously expressed CaM kinase [Source:MGI Symbol;Acc:MGI:1347357]	0.614622	-0.702229	0.019109
Cebpa	CCAAT/enhancer binding protein (C/EBP), alpha [Source:MGI Symbol;Acc:MGI:99480]	0.614051	-0.703569	0.0463318
Agt	angiotensinogen (serpin peptidase inhibitor, clade A, member 8) [Source:MGI Symbol;Acc:MGI:87963]	0.613854	-0.704032	0.0486369
Tmem273	transmembrane protein 273 [Source:MGI Symbol;Acc:MGI:1916319]	0.613467	-0.704942	0.0114298
Adgre1	adhesion G protein-coupled receptor E1 [Source:MGI Symbol;Acc:MGI:106912]	0.613347	-0.705225	0.0143121
Ptch2	patched 2 [Source:MGI Symbol;Acc:MGI:1095405]	0.61313	-0.705734	0.0385683
Nrp1	neuropilin 1 [Source:MGI Symbol;Acc:MGI:106206]	0.61288	-0.706322	0.0115783
Ciita	class II transactivator [Source:MGI Symbol;Acc:MGI:108445]	0.612183	-0.707965	0.00204162
Trps1	transcriptional repressor GATA binding 1 [Source:MGI Symbol;Acc:MGI:1927616]	0.611953	-0.708507	0.0137215
Svep1	sushi, von Willebrand factor type A, EGF and pentraxin domain containing 1 [Source:MGI Symbol;Acc:MGI:1928849]	0.611528	-0.709511	0.0397752
Enc1	ectodermal-neural cortex 1 [Source:MGI Symbol;Acc:MGI:109610]	0.610859	-0.711089	0.0015015
2810433D01Rik	RIKEN cDNA 2810433D01 gene [Source:MGI Symbol;Acc:MGI:1924382]	0.610719	-0.711419	0.0172955
Mgmt	O-6-methylguanine-DNA methyltransferase [Source:MGI Symbol;Acc:MGI:96977]	0.610088	-0.71291	0.0345793
Trp53inp2	transformation related protein 53 inducible nuclear protein 2 [Source:MGI Symbol;Acc:MGI:1915978]	0.609208	-0.714994	0.00274063
Gm44250	predicted gene, 44250 [Source:MGI Symbol;Acc:MGI:5690642]	0.609099	-0.715251	0.0486369
Anpep	alanyl (membrane) aminopeptidase [Source:MGI Symbol;Acc:MGI:5000466]	0.6089	-0.715724	0.0194832
Lrg1	leucine-rich alpha-2-glycoprotein 1 [Source:MGI Symbol;Acc:MGI:1924155]	0.608643	-0.716332	0.000427934
Gpr68	G protein-coupled receptor 68 [Source:MGI Symbol;Acc:MGI:2441763]	0.608475	-0.716729	0.0237353
Sik2	salt inducible kinase 2 [Source:MGI Symbol;Acc:MGI:2445031]	0.608122	-0.717567	0.00385319
Cdk18	cyclin-dependent kinase 18 [Source:MGI Symbol;Acc:MGI:97518]	0.607281	-0.719564	0.0314849
Tmem135	transmembrane protein 135 [Source:MGI Symbol;Acc:MGI:1920009]	0.607106	-0.71998	0.00237684
Pde3b	phosphodiesterase 3B, cGMP-inhibited [Source:MGI Symbol;Acc:MGI:1333863]	0.605716	-0.723287	0.0391785
Slc2a13	solute carrier family 2 (facilitated glucose transporter), member 13 [Source:MGI Symbol;Acc:MGI:2146030]	0.605011	-0.724966	0.00175573
Pcdh17	protocadherin 17 [Source:MGI Symbol;Acc:MGI:2684924]	0.604552	-0.726061	0.000991407
Sh3rf2	SH3 domain containing ring finger 2 [Source:MGI Symbol;Acc:MGI:2444628]	0.604148	-0.727027	0.0472625
Rab37	RAB37, member RAS oncogene family [Source:MGI Symbol;Acc:MGI:1929945]	0.602964	-0.729857	0.0483566
Tstd3	thiosulfate sulfurtransferase (rhodanese)-like domain containing 3 [Source:MGI Symbol;Acc:MGI:1924282]	0.60239	-0.73123	0.00732604
Klhl13	kelch-like 13 [Source:MGI Symbol;Acc:MGI:1914705]	0.601467	-0.733441	0.00253692
Ptgr1	prostaglandin reductase 1 [Source:MGI Symbol;Acc:MGI:1914353]	0.599926	-0.737144	1.15021e-07
Lgals3bp	lectin, galactoside-binding, soluble, 3 binding protein [Source:MGI Symbol;Acc:MGI:99554]	0.599769	-0.737522	0.0129029
Gm37233	predicted gene, 37233 [Source:MGI Symbol;Acc:MGI:5610461]	0.598987	-0.739403	0.00506212
Kcnq1	potassium voltage-gated channel, subfamily Q, member 1 [Source:MGI Symbol;Acc:MGI:108083]	0.598963	-0.739461	0.00946825
Bambi-ps1	BMP and activin membrane-bound inhibitor, pseudogene (Xenopus laevis) [Source:MGI Symbol;Acc:MGI:1932402]	0.597057	-0.74406	0.0467386
Trabd2b	TraB domain containing 2B [Source:MGI Symbol;Acc:MGI:3650152]	0.596513	-0.745375	1.59459e-10
Rhod	ras homolog family member D [Source:MGI Symbol;Acc:MGI:108446]	0.595621	-0.747534	0.000478092
Igsf10	immunoglobulin superfamily, member 10 [Source:MGI Symbol;Acc:MGI:1923481]	0.594798	-0.749529	0.00329976
Htatip2	HIV-1 Tat interactive protein 2 [Source:MGI Symbol;Acc:MGI:1859271]	0.594539	-0.750156	0.000399767
Dipk1a	divergent protein kinase domain 1A [Source:MGI Symbol;Acc:MGI:1914516]	0.594207	-0.750963	0.036009
2210406H18Rik	RIKEN cDNA 2210406H18 gene [Source:MGI Symbol;Acc:MGI:1917383]	0.594002	-0.75146	0.0409794
Oip5	Opa interacting protein 5 [Source:MGI Symbol;Acc:MGI:1917895]	0.593947	-0.751594	0.00780275
Rcan2	regulator of calcineurin 2 [Source:MGI Symbol;Acc:MGI:1858219]	0.593814	-0.751916	9.74862e-08
Dram1	DNA-damage regulated autophagy modulator 1 [Source:MGI Symbol;Acc:MGI:1918962]	0.593579	-0.752489	0.0337602
Map7d3	MAP7 domain containing 3 [Source:MGI Symbol;Acc:MGI:2445051]	0.590568	-0.759824	0.00423607
Peg10	paternally expressed 10 [Source:MGI Symbol;Acc:MGI:2157785]	0.588713	-0.764364	0.000171718
Steap4	STEAP family member 4 [Source:MGI Symbol;Acc:MGI:1923560]	0.588265	-0.765461	0.0362816
Sesn2	sestrin 2 [Source:MGI Symbol;Acc:MGI:2651874]	0.588115	-0.765831	0.000312354
Ccdc80	coiled-coil domain containing 80 [Source:MGI Symbol;Acc:MGI:1915146]	0.588007	-0.766094	0.0393277
Pde1b	phosphodiesterase 1B, Ca2+-calmodulin dependent [Source:MGI Symbol;Acc:MGI:97523]	0.587055	-0.768433	3.14626e-05
Nlrp1a	NLR family, pyrin domain containing 1A [Source:MGI Symbol;Acc:MGI:2684861]	0.586634	-0.769467	0.0429616
Dock2	dedicator of cyto-kinesis 2 [Source:MGI Symbol;Acc:MGI:2149010]	0.586243	-0.77043	0.0111614
Rflnb	refilin B [Source:MGI Symbol;Acc:MGI:1923816]	0.584681	-0.774279	0.00184304
Aplnr	apelin receptor [Source:MGI Symbol;Acc:MGI:1346086]	0.584116	-0.775673	0.0102698
Plagl1	pleiomorphic adenoma gene-like 1 [Source:MGI Symbol;Acc:MGI:1100874]	0.584031	-0.775884	0.00394052
Rnasel	ribonuclease L (2', 5'-oligoisoadenylate synthetase-dependent) [Source:MGI Symbol;Acc:MGI:1098272]	0.581524	-0.782089	0.00102941
Alcam	activated leukocyte cell adhesion molecule [Source:MGI Symbol;Acc:MGI:1313266]	0.581355	-0.78251	0.000999278
Ugt1a7c	UDP glucuronosyltransferase 1 family, polypeptide A7C [Source:MGI Symbol;Acc:MGI:3032636]	0.580983	-0.783432	0.00588223
Sh3tc1	SH3 domain and tetratricopeptide repeats 1 [Source:MGI Symbol;Acc:MGI:2678949]	0.57969	-0.786647	4.39822e-05
Tspan11	tetraspanin 11 [Source:MGI Symbol;Acc:MGI:1915748]	0.574597	-0.799377	0.0303425
Tes	testis derived transcript [Source:MGI Symbol;Acc:MGI:105081]	0.571088	-0.808215	0.00403678
5033406O09Rik	RIKEN cDNA 5033406O09 gene [Source:MGI Symbol;Acc:MGI:1923205]	0.569229	-0.812919	0.0152924
Scube3	signal peptide, CUB domain, EGF-like 3 [Source:MGI Symbol;Acc:MGI:3045253]	0.568793	-0.814025	0.0301
C920009B18Rik	RIKEN cDNA C920009B18 gene [Source:MGI Symbol;Acc:MGI:3583961]	0.567676	-0.81686	0.0240648
Map4k1	mitogen-activated protein kinase kinase kinase kinase 1 [Source:MGI Symbol;Acc:MGI:1346882]	0.567584	-0.817094	3.14626e-05
Gm15326	predicted gene 15326 [Source:MGI Symbol;Acc:MGI:3705205]	0.566694	-0.819357	0.00517765
Rnf150	ring finger protein 150 [Source:MGI Symbol;Acc:MGI:2443860]	0.565315	-0.822873	0.000453305
Esr1	estrogen receptor 1 (alpha) [Source:MGI Symbol;Acc:MGI:1352467]	0.564987	-0.823711	0.00647991
Mpeg1	macrophage expressed gene 1 [Source:MGI Symbol;Acc:MGI:1333743]	0.56425	-0.825594	0.00277622
Plin2	perilipin 2 [Source:MGI Symbol;Acc:MGI:87920]	0.563615	-0.827217	0.00946825
Lpar5	lysophosphatidic acid receptor 5 [Source:MGI Symbol;Acc:MGI:2685918]	0.561877	-0.831673	0.0206264
Gm20721	predicted gene, 20721 [Source:MGI Symbol;Acc:MGI:5313030]	0.560685	-0.834738	0.00182547
Tfpi2	tissue factor pathway inhibitor 2 [Source:MGI Symbol;Acc:MGI:108543]	0.560006	-0.836485	0.00164115
Cmtm8	CKLF-like MARVEL transmembrane domain containing 8 [Source:MGI Symbol;Acc:MGI:2447167]	0.559731	-0.837194	0.0375152
Il4i1	interleukin 4 induced 1 [Source:MGI Symbol;Acc:MGI:109552]	0.559646	-0.837413	0.0408492
Nup210	nucleoporin 210 [Source:MGI Symbol;Acc:MGI:1859555]	0.558087	-0.841438	0.000100398
Cd180	CD180 antigen [Source:MGI Symbol;Acc:MGI:1194924]	0.556182	-0.84637	4.46752e-06
Gm30329	predicted gene, 30329 [Source:MGI Symbol;Acc:MGI:5589488]	0.554878	-0.849758	0.0436808
Vipr2	vasoactive intestinal peptide receptor 2 [Source:MGI Symbol;Acc:MGI:107166]	0.55477	-0.850038	0.000780403
Insl6	insulin-like 6 [Source:MGI Symbol;Acc:MGI:1351595]	0.550284	-0.861751	0.0359031
Cd300a	CD300A molecule [Source:MGI Symbol;Acc:MGI:2443411]	0.550276	-0.861772	0.000176039
Nnmt	nicotinamide N-methyltransferase [Source:MGI Symbol;Acc:MGI:1099443]	0.550087	-0.862268	0.0433498
Mrc2	mannose receptor, C type 2 [Source:MGI Symbol;Acc:MGI:107818]	0.549753	-0.863145	0.000236025
Tmem178b	transmembrane protein 178B [Source:MGI Symbol;Acc:MGI:3647581]	0.548963	-0.865218	0.0292968
Fetub	fetuin beta [Source:MGI Symbol;Acc:MGI:1890221]	0.547745	-0.868425	0.000176039
Tlr8	toll-like receptor 8 [Source:MGI Symbol;Acc:MGI:2176887]	0.546987	-0.870421	0.0290384
Cyp2s1	cytochrome P450, family 2, subfamily s, polypeptide 1 [Source:MGI Symbol;Acc:MGI:1921384]	0.546923	-0.870589	0.00309167
Map3k7cl	Map3k7 C-terminal like [Source:MGI Symbol;Acc:MGI:2446584]	0.54681	-0.870888	0.00102941
Myl4	myosin, light polypeptide 4 [Source:MGI Symbol;Acc:MGI:97267]	0.545292	-0.874898	0.049455
Adamts12	a disintegrin-like and metallopeptidase (reprolysin type) with thrombospondin type 1 motif, 12 [Source:MGI Symbol;Acc:MGI:2146046]	0.545191	-0.875166	0.0124985
Vipr1	vasoactive intestinal peptide receptor 1 [Source:MGI Symbol;Acc:MGI:109272]	0.545111	-0.875377	0.0290849
Mfge8	milk fat globule-EGF factor 8 protein [Source:MGI Symbol;Acc:MGI:102768]	0.543978	-0.878379	0.00165587
Gtse1	G two S phase expressed protein 1 [Source:MGI Symbol;Acc:MGI:1352755]	0.543878	-0.878646	0.00122685
Mn1	meningioma 1 [Source:MGI Symbol;Acc:MGI:1261813]	0.543086	-0.880746	0.0289626
Unc119	unc-119 lipid binding chaperone [Source:MGI Symbol;Acc:MGI:1328357]	0.542461	-0.88241	0.000189808
Mmd	monocyte to macrophage differentiation-associated [Source:MGI Symbol;Acc:MGI:1914718]	0.540693	-0.887118	0.0476936
Cdca7l	cell division cycle associated 7 like [Source:MGI Symbol;Acc:MGI:2384982]	0.539858	-0.889349	0.0161212
Ulbp1	UL16 binding protein 1 [Source:MGI Symbol;Acc:MGI:1925027]	0.537471	-0.89574	0.00864895
Tmem255a	transmembrane protein 255A [Source:MGI Symbol;Acc:MGI:3045722]	0.537298	-0.896205	0.00533127
Eepd1	endonuclease/exonuclease/phosphatase family domain containing 1 [Source:MGI Symbol;Acc:MGI:1914734]	0.535116	-0.902077	0.0330262
1700019D03Rik	RIKEN cDNA 1700019D03 gene [Source:MGI Symbol;Acc:MGI:1914330]	0.534422	-0.90395	0.00831257
Hebp1	heme binding protein 1 [Source:MGI Symbol;Acc:MGI:1333880]	0.533297	-0.90699	0.0190322
Pon3	paraoxonase 3 [Source:MGI Symbol;Acc:MGI:106686]	0.533025	-0.907726	0.0418519
B3galt5	UDP-Gal:betaGlcNAc beta 1,3-galactosyltransferase, polypeptide 5 [Source:MGI Symbol;Acc:MGI:2136878]	0.532313	-0.909654	0.00548589
Spef2	sperm flagellar 2 [Source:MGI Symbol;Acc:MGI:2443727]	0.532214	-0.909921	0.0124238
Il1r2	interleukin 1 receptor, type II [Source:MGI Symbol;Acc:MGI:96546]	0.52991	-0.916182	0.0206264
Stc2	stanniocalcin 2 [Source:MGI Symbol;Acc:MGI:1316731]	0.527738	-0.922107	0.00543479
Peg3	paternally expressed 3 [Source:MGI Symbol;Acc:MGI:104748]	0.527372	-0.923107	8.25435e-05
Naip2	NLR family, apoptosis inhibitory protein 2 [Source:MGI Symbol;Acc:MGI:1298226]	0.526865	-0.924496	0.00504104
Abhd15	abhydrolase domain containing 15 [Source:MGI Symbol;Acc:MGI:1914727]	0.526599	-0.925222	0.00417042
Nxpe5	neurexophilin and PC-esterase domain family, member 5 [Source:MGI Symbol;Acc:MGI:3584036]	0.526181	-0.92637	0.00439761
Gpr162	G protein-coupled receptor 162 [Source:MGI Symbol;Acc:MGI:1315214]	0.524399	-0.931262	0.043608
Gadd45a	growth arrest and DNA-damage-inducible 45 alpha [Source:MGI Symbol;Acc:MGI:107799]	0.523106	-0.934825	2.38446e-12
Lurap1l	leucine rich adaptor protein 1-like [Source:MGI Symbol;Acc:MGI:106510]	0.521025	-0.940576	5.12066e-05
9130410C08Rik	RIKEN cDNA 9130410C08 gene [Source:MGI Symbol;Acc:MGI:1918862]	0.519535	-0.944708	0.00416221
Frrs1	ferric-chelate reductase 1 [Source:MGI Symbol;Acc:MGI:108076]	0.518849	-0.946612	5.28493e-05
Slc28a2	solute carrier family 28 (sodium-coupled nucleoside transporter), member 2 [Source:MGI Symbol;Acc:MGI:1913105]	0.518513	-0.947548	0.00304929
Slc16a10	solute carrier family 16 (monocarboxylic acid transporters), member 10 [Source:MGI Symbol;Acc:MGI:1919722]	0.517874	-0.949326	6.81065e-05
Pik3ap1	phosphoinositide-3-kinase adaptor protein 1 [Source:MGI Symbol;Acc:MGI:1933177]	0.517214	-0.951168	0.00126767
Bnip5	BCL2 interacting protein 5 [Source:MGI Symbol;Acc:MGI:1925441]	0.5172	-0.951206	0.0274851
Adamts16	a disintegrin-like and metallopeptidase (reprolysin type) with thrombospondin type 1 motif, 16 [Source:MGI Symbol;Acc:MGI:2429637]	0.514435	-0.95894	0.0260765
Lyz1	lysozyme 1 [Source:MGI Symbol;Acc:MGI:96902]	0.513654	-0.961132	0.0485591
Tmem37	transmembrane protein 37 [Source:MGI Symbol;Acc:MGI:2157899]	0.512515	-0.964334	0.0116962
Srpx2	sushi-repeat-containing protein, X-linked 2 [Source:MGI Symbol;Acc:MGI:1916042]	0.512504	-0.964364	0.00523866
Igf1	insulin-like growth factor 1 [Source:MGI Symbol;Acc:MGI:96432]	0.510614	-0.969696	0.00437805
Sync	syncoilin [Source:MGI Symbol;Acc:MGI:1916078]	0.50898	-0.974318	0.0311263
Liph	lipase, member H [Source:MGI Symbol;Acc:MGI:2388029]	0.506387	-0.981688	0.0494647
Dhx32	DEAH (Asp-Glu-Ala-His) box polypeptide 32 [Source:MGI Symbol;Acc:MGI:2141813]	0.502772	-0.992024	1.40397e-05
Slc37a1	solute carrier family 37 (glycerol-3-phosphate transporter), member 1 [Source:MGI Symbol;Acc:MGI:2446181]	0.500971	-0.997202	0.000147707
Zfp831	zinc finger protein 831 [Source:MGI Symbol;Acc:MGI:3641861]	0.500885	-0.997449	0.0290866
Cd200r1	CD200 receptor 1 [Source:MGI Symbol;Acc:MGI:1889024]	0.500239	-0.99931	0.00316405
Plbd1	phospholipase B domain containing 1 [Source:MGI Symbol;Acc:MGI:1914107]	0.499347	-1.00188	0.000999278
Gm16118	predicted gene 16118 [Source:MGI Symbol;Acc:MGI:3801926]	0.498452	-1.00447	0.0429256
Slamf8	SLAM family member 8 [Source:MGI Symbol;Acc:MGI:1921998]	0.497937	-1.00597	0.00513501
Sim2	single-minded family bHLH transcription factor 2 [Source:MGI Symbol;Acc:MGI:98307]	0.496854	-1.0091	0.0426465
Atp1a3	ATPase, Na+/K+ transporting, alpha 3 polypeptide [Source:MGI Symbol;Acc:MGI:88107]	0.495124	-1.01414	0.000176039
Aoc3	amine oxidase, copper containing 3 [Source:MGI Symbol;Acc:MGI:1306797]	0.49504	-1.01438	0.00696986
Pstpip2	proline-serine-threonine phosphatase-interacting protein 2 [Source:MGI Symbol;Acc:MGI:1335088]	0.493087	-1.02008	0.012179
Pira2	paired-Ig-like receptor A2 [Source:MGI Symbol;Acc:MGI:1195970]	0.49099	-1.02623	0.0196262
Tagln3	transgelin 3 [Source:MGI Symbol;Acc:MGI:1926784]	0.490646	-1.02725	0.000445207
A330074K22Rik	RIKEN cDNA A330074K22 gene [Source:MGI Symbol;Acc:MGI:3045392]	0.489441	-1.03079	0.00370182
Arhgap20	Rho GTPase activating protein 20 [Source:MGI Symbol;Acc:MGI:2445175]	0.488415	-1.03382	0.000311347
Il2rb	interleukin 2 receptor, beta chain [Source:MGI Symbol;Acc:MGI:96550]	0.486556	-1.03932	0.00376846
Pcdh12	protocadherin 12 [Source:MGI Symbol;Acc:MGI:1855700]	0.486424	-1.03971	0.00466511
Prcd	photoreceptor disc component [Source:MGI Symbol;Acc:MGI:3649529]	0.484578	-1.0452	0.00382419
Sirpb1a	signal-regulatory protein beta 1A [Source:MGI Symbol;Acc:MGI:2444824]	0.483662	-1.04793	0.0119434
Ltc4s	leukotriene C4 synthase [Source:MGI Symbol;Acc:MGI:107498]	0.48359	-1.04814	4.39822e-05
Ccdc125	coiled-coil domain containing 125 [Source:MGI Symbol;Acc:MGI:1923291]	0.482653	-1.05094	0.00346319
AI427809	expressed sequence AI427809 [Source:MGI Symbol;Acc:MGI:2140270]	0.481261	-1.05511	0.000112894
Adgre4	adhesion G protein-coupled receptor E4 [Source:MGI Symbol;Acc:MGI:1196464]	0.481224	-1.05522	0.0442071
Fmn1	formin 1 [Source:MGI Symbol;Acc:MGI:101815]	0.479586	-1.06014	4.69503e-09
Pianp	PILR alpha associated neural protein [Source:MGI Symbol;Acc:MGI:2441908]	0.479542	-1.06027	0.0265432
Gapt	Grb2-binding adaptor, transmembrane [Source:MGI Symbol;Acc:MGI:3608341]	0.479542	-1.06027	0.0084192
	18s RNA, related sequence 5	0.47944	-1.06058	0.0448492
Cd209a	CD209a antigen [Source:MGI Symbol;Acc:MGI:2157942]	0.476963	-1.06805	0.00268799
Gm32098	predicted gene, 32098 [Source:MGI Symbol;Acc:MGI:5591257]	0.475833	-1.07147	0.0448492
Nlrp10	NLR family, pyrin domain containing 10 [Source:MGI Symbol;Acc:MGI:2444084]	0.475373	-1.07287	0.0265533
Klhl30	kelch-like 30 [Source:MGI Symbol;Acc:MGI:1918038]	0.474816	-1.07456	0.00293742
Hvcn1	hydrogen voltage-gated channel 1 [Source:MGI Symbol;Acc:MGI:1921346]	0.474144	-1.0766	0.000635076
Tenm4	teneurin transmembrane protein 4 [Source:MGI Symbol;Acc:MGI:2447063]	0.471228	-1.0855	0.0203912
Lgals3	lectin, galactose binding, soluble 3 [Source:MGI Symbol;Acc:MGI:96778]	0.467556	-1.09679	4.63374e-09
F2r	coagulation factor II (thrombin) receptor [Source:MGI Symbol;Acc:MGI:101802]	0.464647	-1.10579	0.00121415
Slamf7	SLAM family member 7 [Source:MGI Symbol;Acc:MGI:1922595]	0.460591	-1.11844	0.00282585
Pmaip1	phorbol-12-myristate-13-acetate-induced protein 1 [Source:MGI Symbol;Acc:MGI:1930146]	0.459946	-1.12046	0.0163786
Klrk1	killer cell lectin-like receptor subfamily K, member 1 [Source:MGI Symbol;Acc:MGI:1196250]	0.457843	-1.12708	0.0215867
Aldh1a2	aldehyde dehydrogenase family 1, subfamily A2 [Source:MGI Symbol;Acc:MGI:107928]	0.455049	-1.1359	0.00379767
Rit2	Ras-like without CAAX 2 [Source:MGI Symbol;Acc:MGI:108054]	0.454158	-1.13873	0.0147516
Sh2d1b1	SH2 domain containing 1B1 [Source:MGI Symbol;Acc:MGI:1349420]	0.453168	-1.14188	0.00657206
Ffar2	free fatty acid receptor 2 [Source:MGI Symbol;Acc:MGI:2441731]	0.452646	-1.14354	0.00780275
Podnl1	podocan-like 1 [Source:MGI Symbol;Acc:MGI:2685352]	0.45106	-1.14861	0.0222151
Hdac9	histone deacetylase 9 [Source:MGI Symbol;Acc:MGI:1931221]	0.449873	-1.15241	4.2281e-06
Serpine1	serine (or cysteine) peptidase inhibitor, clade E, member 1 [Source:MGI Symbol;Acc:MGI:97608]	0.448663	-1.15629	1.51991e-06
Tnfrsf18	tumor necrosis factor receptor superfamily, member 18 [Source:MGI Symbol;Acc:MGI:894675]	0.444282	-1.17045	0.0214455
Hgf	hepatocyte growth factor [Source:MGI Symbol;Acc:MGI:96079]	0.443785	-1.17207	0.0040011
Npas2	neuronal PAS domain protein 2 [Source:MGI Symbol;Acc:MGI:109232]	0.442755	-1.17542	0.00274063
Gm26588	predicted gene, 26588 [Source:MGI Symbol;Acc:MGI:5477082]	0.440306	-1.18342	0.0414121
Pcolce2	procollagen C-endopeptidase enhancer 2 [Source:MGI Symbol;Acc:MGI:1923727]	0.439481	-1.18613	0.000110582
Drd1	dopamine receptor D1 [Source:MGI Symbol;Acc:MGI:99578]	0.438409	-1.18965	0.0330987
P2rx6	purinergic receptor P2X, ligand-gated ion channel, 6 [Source:MGI Symbol;Acc:MGI:1337113]	0.434553	-1.2024	0.0178205
Cela1	chymotrypsin-like elastase family, member 1 [Source:MGI Symbol;Acc:MGI:95314]	0.434025	-1.20415	0.000100398
Cdsn	corneodesmosin [Source:MGI Symbol;Acc:MGI:3505689]	0.43365	-1.2054	0.000711979
Col6a6	collagen, type VI, alpha 6 [Source:MGI Symbol;Acc:MGI:2444259]	0.433504	-1.20588	0.0379745
Gldc	glycine decarboxylase [Source:MGI Symbol;Acc:MGI:1341155]	0.431559	-1.21237	0.0222898
Slc17a8	solute carrier family 17 (sodium-dependent inorganic phosphate cotransporter), member 8 [Source:MGI Symbol;Acc:MGI:3039629]	0.431256	-1.21338	6.42651e-06
Lpgat1	lysophosphatidylglycerol acyltransferase 1 [Source:MGI Symbol;Acc:MGI:2446186]	0.42833	-1.2232	0.00115015
Tnip3	TNFAIP3 interacting protein 3 [Source:MGI Symbol;Acc:MGI:3041165]	0.428168	-1.22375	0.00326213
Ikzf3	IKAROS family zinc finger 3 [Source:MGI Symbol;Acc:MGI:1342542]	0.426722	-1.22863	0.00722092
Abca1	ATP-binding cassette, sub-family A (ABC1), member 1 [Source:MGI Symbol;Acc:MGI:99607]	0.425591	-1.23246	4.63374e-09
Dock8	dedicator of cytokinesis 8 [Source:MGI Symbol;Acc:MGI:1921396]	0.422372	-1.24341	1.74307e-09
Dmrt2	doublesex and mab-3 related transcription factor 2 [Source:MGI Symbol;Acc:MGI:1330307]	0.417807	-1.25909	0.0292501
Cfb	complement factor B [Source:MGI Symbol;Acc:MGI:105975]	0.415049	-1.26865	0.00150391
Cubn	cubilin (intrinsic factor-cobalamin receptor) [Source:MGI Symbol;Acc:MGI:1931256]	0.412449	-1.27771	1.6253e-05
Gm15972	predicted gene 15972 [Source:MGI Symbol;Acc:MGI:3801965]	0.409457	-1.28822	0.0476936
Gm14221	predicted gene 14221 [Source:MGI Symbol;Acc:MGI:3650696]	0.406606	-1.2983	0.0429616
Dusp10	dual specificity phosphatase 10 [Source:MGI Symbol;Acc:MGI:1927070]	0.403352	-1.30989	7.12981e-16
Xkr7	X-linked Kx blood group related 7 [Source:MGI Symbol;Acc:MGI:3526711]	0.403108	-1.31076	0.00698402
Dusp9	dual specificity phosphatase 9 [Source:MGI Symbol;Acc:MGI:2387107]	0.402953	-1.31132	0.0266163
Prr16	proline rich 16 [Source:MGI Symbol;Acc:MGI:1918623]	0.402288	-1.3137	0.030343
Nos2	nitric oxide synthase 2, inducible [Source:MGI Symbol;Acc:MGI:97361]	0.401183	-1.31767	0.00928147
Hhip	Hedgehog-interacting protein [Source:MGI Symbol;Acc:MGI:1341847]	0.401069	-1.31808	0.0448492
Ano3	anoctamin 3 [Source:MGI Symbol;Acc:MGI:3613666]	0.400381	-1.32056	0.00102308
Tmem158	transmembrane protein 158 [Source:MGI Symbol;Acc:MGI:1919559]	0.399207	-1.32479	0.00012444
Btc	betacellulin, epidermal growth factor family member [Source:MGI Symbol;Acc:MGI:99439]	0.398593	-1.32701	8.20079e-11
Ccl8	chemokine (C-C motif) ligand 8 [Source:MGI Symbol;Acc:MGI:101878]	0.397228	-1.33196	0.0215867
Cxcr6	chemokine (C-X-C motif) receptor 6 [Source:MGI Symbol;Acc:MGI:1934582]	0.393255	-1.34646	0.0093417
Stra6l	STRA6-like [Source:MGI Symbol;Acc:MGI:1921402]	0.392491	-1.34927	0.0183519
Trbc1	T cell receptor beta, constant region 1 [Source:MGI Symbol;Acc:MGI:4439726]	0.38667	-1.37082	0.00668764
Lratd1	LRAT domain containing 1 [Source:MGI Symbol;Acc:MGI:2145011]	0.385655	-1.37462	0.0132829
Nr1h4	nuclear receptor subfamily 1, group H, member 4 [Source:MGI Symbol;Acc:MGI:1352464]	0.383644	-1.38216	1.94161e-06
Myocd	myocardin [Source:MGI Symbol;Acc:MGI:2137495]	0.378335	-1.40226	0.00548589
Sez6	seizure related gene 6 [Source:MGI Symbol;Acc:MGI:104745]	0.377902	-1.40392	2.73863e-05
Sirpb1c	signal-regulatory protein beta 1C [Source:MGI Symbol;Acc:MGI:3807521]	0.37311	-1.42233	0.000206445
F7	coagulation factor VII [Source:MGI Symbol;Acc:MGI:109325]	0.372433	-1.42495	0.00407081
Gimap1os	GTPase, IMAP family member 1, opposite strand [Source:MGI Symbol;Acc:MGI:3781523]	0.37048	-1.43253	0.0490684
Card11	caspase recruitment domain family, member 11 [Source:MGI Symbol;Acc:MGI:1916978]	0.369002	-1.4383	4.68099e-07
Clec9a	C-type lectin domain family 9, member a [Source:MGI Symbol;Acc:MGI:2444608]	0.368361	-1.44081	0.000129995
NA	NA	0.367476	-1.44428	0.0238036
Klra7	killer cell lectin-like receptor, subfamily A, member 7 [Source:MGI Symbol;Acc:MGI:101901]	0.367226	-1.44526	0.0408492
Gpr55	G protein-coupled receptor 55 [Source:MGI Symbol;Acc:MGI:2685064]	0.362515	-1.46389	0.0349623
Nkg7	natural killer cell group 7 sequence [Source:MGI Symbol;Acc:MGI:1931250]	0.355178	-1.49339	0.00729767
Dnajc6	DnaJ heat shock protein family (Hsp40) member C6 [Source:MGI Symbol;Acc:MGI:1919935]	0.354507	-1.49612	0.00215475
Nyap2	neuronal tyrosine-phophorylated phosphoinositide 3-kinase adaptor 2 [Source:MGI Symbol;Acc:MGI:2443135]	0.352273	-1.50524	0.00682686
Mup3	major urinary protein 3 [Source:MGI Symbol;Acc:MGI:97235]	0.35222	-1.50545	0.0483013
Gm15851	predicted gene 15851 [Source:MGI Symbol;Acc:MGI:3801734]	0.352172	-1.50565	0.0338985
F2rl3	coagulation factor II (thrombin) receptor-like 3 [Source:MGI Symbol;Acc:MGI:1298207]	0.351256	-1.5094	0.0472625
Pakap	paralemmin A kinase anchor protein [Source:MGI Symbol;Acc:MGI:5141924]	0.35087	-1.51099	0.0314586
Ptchd4	patched domain containing 4 [Source:MGI Symbol;Acc:MGI:1920485]	0.348497	-1.52078	0.0277435
Mogat2	monoacylglycerol O-acyltransferase 2 [Source:MGI Symbol;Acc:MGI:2663253]	0.346853	-1.5276	0.0392612
Cxcl9	chemokine (C-X-C motif) ligand 9 [Source:MGI Symbol;Acc:MGI:1352449]	0.342941	-1.54397	0.0242464
Tmem267	transmembrane protein 267 [Source:MGI Symbol;Acc:MGI:3648543]	0.34292	-1.54406	0.0132829
Eef1a2	eukaryotic translation elongation factor 1 alpha 2 [Source:MGI Symbol;Acc:MGI:1096317]	0.341489	-1.55009	0.029115
Cd28	CD28 antigen [Source:MGI Symbol;Acc:MGI:88327]	0.337086	-1.56881	0.000755497
Duoxa1	dual oxidase maturation factor 1 [Source:MGI Symbol;Acc:MGI:2384861]	0.33685	-1.56982	3.95981e-10
Gm47815	predicted gene, 47815 [Source:MGI Symbol;Acc:MGI:6097001]	0.333612	-1.58376	0.0459126
Pgr	progesterone receptor [Source:MGI Symbol;Acc:MGI:97567]	0.333286	-1.58517	0.00860783
Gm5547	predicted gene 5547 [Source:MGI Symbol;Acc:MGI:3648206]	0.33323	-1.58541	0.0158795
Gm27483	predicted gene, 27483 [Source:MGI Symbol;Acc:MGI:5530865]	0.329608	-1.60118	0.0431106
Il12rb2	interleukin 12 receptor, beta 2 [Source:MGI Symbol;Acc:MGI:1270861]	0.325578	-1.61893	0.00298344
Slc8a1	solute carrier family 8 (sodium/calcium exchanger), member 1 [Source:MGI Symbol;Acc:MGI:107956]	0.318606	-1.65015	2.20282e-06
Pramef12	PRAME family member 12 [Source:MGI Symbol;Acc:MGI:1924882]	0.31602	-1.66191	0.00336702
4930474H06Rik	RIKEN cDNA 4930474H06 gene [Source:MGI Symbol;Acc:MGI:3697432]	0.306774	-1.70475	0.0272148
Klrc1	killer cell lectin-like receptor subfamily C, member 1 [Source:MGI Symbol;Acc:MGI:1336161]	0.304949	-1.71336	0.0190322
Itgax	integrin alpha X [Source:MGI Symbol;Acc:MGI:96609]	0.303927	-1.7182	3.57552e-08
Gm11379	predicted gene 11379 [Source:MGI Symbol;Acc:MGI:3650783]	0.303916	-1.71826	0.0442581
Pcdh20	protocadherin 20 [Source:MGI Symbol;Acc:MGI:2443376]	0.303027	-1.72248	5.75466e-05
Slc18a1	solute carrier family 18 (vesicular monoamine), member 1 [Source:MGI Symbol;Acc:MGI:106684]	0.296337	-1.75469	0.00165405
Fam89a	family with sequence similarity 89, member A [Source:MGI Symbol;Acc:MGI:1916877]	0.296058	-1.75605	3.31722e-06
Apol7c	apolipoprotein L 7c [Source:MGI Symbol;Acc:MGI:1920912]	0.292174	-1.7751	0.00648487
Adh7	alcohol dehydrogenase 7 (class IV), mu or sigma polypeptide [Source:MGI Symbol;Acc:MGI:87926]	0.288501	-1.79335	1.86726e-08
Gm5150	predicted gene 5150 [Source:MGI Symbol;Acc:MGI:3779469]	0.282348	-1.82445	0.00439761
Alox15	arachidonate 15-lipoxygenase [Source:MGI Symbol;Acc:MGI:87997]	0.281471	-1.82894	0.0190322
Ccr3	chemokine (C-C motif) receptor 3 [Source:MGI Symbol;Acc:MGI:104616]	0.27904	-1.84146	0.0289827
Kcne1l	potassium voltage-gated channel, Isk-related family, member 1-like, pseudogene [Source:MGI Symbol;Acc:MGI:1913490]	0.276828	-1.85294	0.00461105
Pkp1	plakophilin 1 [Source:MGI Symbol;Acc:MGI:1328359]	0.276585	-1.8542	0.00519018
C6	complement component 6 [Source:MGI Symbol;Acc:MGI:88233]	0.275519	-1.85978	0.0115893
C130026I21Rik	RIKEN cDNA C130026I21 gene [Source:MGI Symbol;Acc:MGI:3612702]	0.273919	-1.86818	4.53859e-05
Gm20056	predicted gene, 20056 [Source:MGI Symbol;Acc:MGI:5012241]	0.271552	-1.8807	6.04469e-05
Car6	carbonic anhydrase 6 [Source:MGI Symbol;Acc:MGI:1333786]	0.271394	-1.88154	0.0203
Klk1	kallikrein 1 [Source:MGI Symbol;Acc:MGI:102850]	0.270974	-1.88377	0.0149511
Prokr2	prokineticin receptor 2 [Source:MGI Symbol;Acc:MGI:2181363]	0.270271	-1.88752	0.0351248
Kcnj15	potassium inwardly-rectifying channel, subfamily J, member 15 [Source:MGI Symbol;Acc:MGI:1310000]	0.266195	-1.90944	8.45948e-05
Tfr2	transferrin receptor 2 [Source:MGI Symbol;Acc:MGI:1354956]	0.266001	-1.91049	0.00437805
Gm4316	predicted gene 4316 [Source:MGI Symbol;Acc:MGI:3782497]	0.260202	-1.9423	0.0270558
Aldh3a1	aldehyde dehydrogenase family 3, subfamily A1 [Source:MGI Symbol;Acc:MGI:1353451]	0.259856	-1.94422	2.89775e-10
Tm4sf19	transmembrane 4 L six family member 19 [Source:MGI Symbol;Acc:MGI:3645933]	0.24936	-2.0037	0.00378304
Gzmb	granzyme B [Source:MGI Symbol;Acc:MGI:109267]	0.242707	-2.04271	0.00102332
Il5ra	interleukin 5 receptor, alpha [Source:MGI Symbol;Acc:MGI:96558]	0.238567	-2.06754	0.0331354
Unc80	unc-80, NALCN activator [Source:MGI Symbol;Acc:MGI:2652882]	0.235394	-2.08685	0.0244935
Trim29	tripartite motif-containing 29 [Source:MGI Symbol;Acc:MGI:1919419]	0.232431	-2.10512	0.000100398
Mest	mesoderm specific transcript [Source:MGI Symbol;Acc:MGI:96968]	0.229717	-2.12207	1.8731e-07
Gm36816	predicted gene, 36816 [Source:MGI Symbol;Acc:MGI:5595975]	0.208715	-2.26039	0.0465835
Chrm4	cholinergic receptor, muscarinic 4 [Source:MGI Symbol;Acc:MGI:88399]	0.208051	-2.26499	0.0188382
Ggt6	gamma-glutamyltransferase 6 [Source:MGI Symbol;Acc:MGI:1918772]	0.207601	-2.26811	0.0496377
Chst13	carbohydrate sulfotransferase 13 [Source:MGI Symbol;Acc:MGI:1919047]	0.203696	-2.29551	0.024481
8030423F21Rik	RIKEN cDNA 8030423F21 gene [Source:MGI Symbol;Acc:MGI:2443206]	0.202347	-2.3051	0.000227907
Hesx1	homeobox gene expressed in ES cells [Source:MGI Symbol;Acc:MGI:96071]	0.2006	-2.31761	0.0323449
Cpa2	carboxypeptidase A2, pancreatic [Source:MGI Symbol;Acc:MGI:3617840]	0.198023	-2.33626	1.19868e-06
Mmp12	matrix metallopeptidase 12 [Source:MGI Symbol;Acc:MGI:97005]	0.189807	-2.39739	0.00264761
Klhl32	kelch-like 32 [Source:MGI Symbol;Acc:MGI:3612790]	0.1763	-2.50389	2.55025e-07
Klf14	Kruppel-like factor 14 [Source:MGI Symbol;Acc:MGI:3577024]	0.173341	-2.52831	0.00207937
Atp6v0d2	ATPase, H+ transporting, lysosomal V0 subunit D2 [Source:MGI Symbol;Acc:MGI:1924415]	0.165694	-2.59341	4.04155e-21
Il13ra2	interleukin 13 receptor, alpha 2 [Source:MGI Symbol;Acc:MGI:1277954]	0.164334	-2.60529	0.00473209
Olig1	oligodendrocyte transcription factor 1 [Source:MGI Symbol;Acc:MGI:1355334]	0.16231	-2.62317	0.0480525
Saa3	serum amyloid A 3 [Source:MGI Symbol;Acc:MGI:98223]	0.148917	-2.74742	6.54904e-06
Gm2619	predicted gene 2619 [Source:MGI Symbol;Acc:MGI:3780787]	0.142321	-2.81278	0.0397752
Apoc4	apolipoprotein C-IV [Source:MGI Symbol;Acc:MGI:87878]	0.126491	-2.9829	0.00384729
Tcerg1l	transcription elongation regulator 1-like [Source:MGI Symbol;Acc:MGI:1917821]	0.119305	-3.06728	0.00372055
Spns3	spinster homolog 3 [Source:MGI Symbol;Acc:MGI:1924827]	0.106789	-3.22717	5.28493e-05
Pla2g2e	phospholipase A2, group IIE [Source:MGI Symbol;Acc:MGI:1349660]	0.105444	-3.24545	7.50908e-10
Cfi	complement component factor i [Source:MGI Symbol;Acc:MGI:105937]	0.0895893	-3.48053	0.000445207
Ighv5-17	immunoglobulin heavy variable 5-17 [Source:MGI Symbol;Acc:MGI:4439533]	0.072787	-3.78018	0.025636
Ighv1-26	immunoglobulin heavy variable 1-26 [Source:MGI Symbol;Acc:MGI:4439641]	0.0538439	-4.21507	0.0323984

## Sheet: D
(D) The 303 genes significantly regulated in young WT 3 day cut vs uninjured and aged c-Jun OE/+ 3 day cut vs uninjured (Fig. 9G)
3 day cut young WT vs UI						3 day cut aged c-Jun OE/+ vs UI
Gene		Fold Change	log Fold Change	Adjusted p Value		Gene		Fold Change	log Fold Change	Adjusted p Value
Olig1	oligodendrocyte transcription factor 1 [Source:MGI Symbol;Acc:MGI:1355334]	72.7115	6.18411	8.79901e-08		Crhbp	corticotropin releasing hormone binding protein [Source:MGI Symbol;Acc:MGI:88497]	27.3762	4.77485	7.95928e-05
Crhbp	corticotropin releasing hormone binding protein [Source:MGI Symbol;Acc:MGI:88497]	26.2571	4.71464	0.00293902		Gm8091	predicted gene 8091 [Source:MGI Symbol;Acc:MGI:3643169]	15.6407	3.96724	0.00813309
Klhl32	kelch-like 32 [Source:MGI Symbol;Acc:MGI:3612790]	19.2573	4.26733	4.45758e-15		Rhd	Rh blood group, D antigen [Source:MGI Symbol;Acc:MGI:1202882]	14.0527	3.81278	0.000665013
Hsd11b2	hydroxysteroid 11-beta dehydrogenase 2 [Source:MGI Symbol;Acc:MGI:104720]	15.3489	3.94006	3.37609e-06		Gm16233	predicted gene 16233 [Source:MGI Symbol;Acc:MGI:3802088]	9.95911	3.31602	9.32031e-05
Klra3	killer cell lectin-like receptor, subfamily A, member 3 [Source:MGI Symbol;Acc:MGI:101905]	12.0728	3.59369	0.00835822		Spink2	serine peptidase inhibitor, Kazal type 2 [Source:MGI Symbol;Acc:MGI:1917232]	9.23132	3.20654	0.000477873
F9	coagulation factor IX [Source:MGI Symbol;Acc:MGI:88384]	11.1427	3.47803	2.95225e-05		Kcns1	K+ voltage-gated channel, subfamily S, 1 [Source:MGI Symbol;Acc:MGI:1197019]	7.18375	2.84474	0.000690988
Mmp12	matrix metallopeptidase 12 [Source:MGI Symbol;Acc:MGI:97005]	9.66485	3.27275	0.0126658		Gm14057	predicted gene 14057 [Source:MGI Symbol;Acc:MGI:3705433]	6.66475	2.73655	5.64054e-07
Dppa3	developmental pluripotency-associated 3 [Source:MGI Symbol;Acc:MGI:1920958]	9.54446	3.25466	1.22626e-05		Slco4c1	solute carrier organic anion transporter family, member 4C1 [Source:MGI Symbol;Acc:MGI:2442784]	6.25707	2.64549	0.000114847
Klri1	killer cell lectin-like receptor family I member 1 [Source:MGI Symbol;Acc:MGI:3530275]	9.1968	3.20113	1.56679e-06		Hapln4	hyaluronan and proteoglycan link protein 4 [Source:MGI Symbol;Acc:MGI:2679531]	4.22759	2.07984	0.0218938
Hapln4	hyaluronan and proteoglycan link protein 4 [Source:MGI Symbol;Acc:MGI:2679531]	8.47302	3.08288	0.000528961		Dppa3	developmental pluripotency-associated 3 [Source:MGI Symbol;Acc:MGI:1920958]	3.98563	1.99481	0.0101162
Aldh3a1	aldehyde dehydrogenase family 3, subfamily A1 [Source:MGI Symbol;Acc:MGI:1353451]	8.21828	3.03884	5.60974e-15		Sytl5	synaptotagmin-like 5 [Source:MGI Symbol;Acc:MGI:2668451]	3.7864	1.92083	0.00641288
Kcns1	K+ voltage-gated channel, subfamily S, 1 [Source:MGI Symbol;Acc:MGI:1197019]	7.72054	2.9487	6.13319e-06		F9	coagulation factor IX [Source:MGI Symbol;Acc:MGI:88384]	3.68522	1.88175	0.00975112
Gm8091	predicted gene 8091 [Source:MGI Symbol;Acc:MGI:3643169]	7.348	2.87735	0.0256457		Hsd11b2	hydroxysteroid 11-beta dehydrogenase 2 [Source:MGI Symbol;Acc:MGI:104720]	3.67812	1.87897	0.0213021
Adh7	alcohol dehydrogenase 7 (class IV), mu or sigma polypeptide [Source:MGI Symbol;Acc:MGI:87926]	6.27424	2.64944	9.71743e-13		Gm12854	predicted gene 12854 [Source:MGI Symbol;Acc:MGI:3650410]	3.67099	1.87617	0.00524686
Barx2	BarH-like homeobox 2 [Source:MGI Symbol;Acc:MGI:109617]	6.01299	2.58808	0.00370626		Il1r2	interleukin 1 receptor, type II [Source:MGI Symbol;Acc:MGI:96546]	3.43632	1.78086	0.00616695
Klrc1	killer cell lectin-like receptor subfamily C, member 1 [Source:MGI Symbol;Acc:MGI:1336161]	5.62503	2.49186	0.00961037		B430305J03Rik	RIKEN cDNA B430305J03 gene [Source:MGI Symbol;Acc:MGI:3697707]	3.4356	1.78056	0.00148025
Il1r2	interleukin 1 receptor, type II [Source:MGI Symbol;Acc:MGI:96546]	5.22233	2.38469	0.000158871		Gm42670	predicted gene 42670 [Source:MGI Symbol;Acc:MGI:5662807]	3.39879	1.76502	0.00536998
Sh2d2a	SH2 domain containing 2A [Source:MGI Symbol;Acc:MGI:1351596]	5.20664	2.38035	0.0017339		1810008B01Rik	RIKEN cDNA 1810008B01 gene [Source:MGI Symbol;Acc:MGI:1916312]	3.28981	1.718	0.0187326
Gimap1os	GTPase, IMAP family member 1, opposite strand [Source:MGI Symbol;Acc:MGI:3781523]	5.16794	2.36959	0.0163524		Olig1	oligodendrocyte transcription factor 1 [Source:MGI Symbol;Acc:MGI:1355334]	3.25397	1.7022	0.00122018
Sytl5	synaptotagmin-like 5 [Source:MGI Symbol;Acc:MGI:2668451]	5.13329	2.35988	6.66125e-05		Barx2	BarH-like homeobox 2 [Source:MGI Symbol;Acc:MGI:109617]	3.18617	1.67182	0.0391028
Gimap7	GTPase, IMAP family member 7 [Source:MGI Symbol;Acc:MGI:1349657]	5.00508	2.32339	0.0311612		Gm45855	predicted gene 45855 [Source:MGI Symbol;Acc:MGI:5804970]	3.11958	1.64135	0.00535926
Tspan11	tetraspanin 11 [Source:MGI Symbol;Acc:MGI:1915748]	4.95525	2.30896	1.5691e-09		Galnt2	polypeptide N-acetylgalactosaminyltransferase 2 [Source:MGI Symbol;Acc:MGI:894694]	3.09243	1.62874	3.32133e-07
Rgs1	regulator of G-protein signaling 1 [Source:MGI Symbol;Acc:MGI:1354694]	4.55564	2.18765	0.0194305		Gm45472	predicted gene 45472 [Source:MGI Symbol;Acc:MGI:5791308]	3.0745	1.62035	0.0131786
Rhd	Rh blood group, D antigen [Source:MGI Symbol;Acc:MGI:1202882]	4.16344	2.05777	0.0056271		Nfe2l3	nuclear factor, erythroid derived 2, like 3 [Source:MGI Symbol;Acc:MGI:1339958]	2.98413	1.57731	0.0242472
1810008B01Rik	RIKEN cDNA 1810008B01 gene [Source:MGI Symbol;Acc:MGI:1916312]	4.15228	2.0539	0.00773264		Rps4x-ps	Rps4x retrotransposed pseudogene [Source:MGI Symbol;Acc:MGI:3644569]	2.8974	1.53476	0.0436221
Ikzf3	IKAROS family zinc finger 3 [Source:MGI Symbol;Acc:MGI:1342542]	4.14719	2.05214	0.0121936		Gm10254	predicted gene 10254 [Source:MGI Symbol;Acc:MGI:3708673]	2.88685	1.5295	0.0261381
Lrg1	leucine-rich alpha-2-glycoprotein 1 [Source:MGI Symbol;Acc:MGI:1924155]	4.03319	2.01192	2.38779e-06		H4c9	H4 clustered histone 9 [Source:MGI Symbol;Acc:MGI:2448432]	2.67052	1.41712	0.0443455
4930474H06Rik	RIKEN cDNA 4930474H06 gene [Source:MGI Symbol;Acc:MGI:3697432]	3.91668	1.96963	0.0406121		Gm17092	predicted gene 17092 [Source:MGI Symbol;Acc:MGI:4937919]	2.64488	1.4032	0.0125048
Pramef12	PRAME family member 12 [Source:MGI Symbol;Acc:MGI:1924882]	3.87589	1.95453	0.0219577		Creb3l1	cAMP responsive element binding protein 3-like 1 [Source:MGI Symbol;Acc:MGI:1347062]	2.64303	1.40219	0.0116913
Gm4900	predicted gene 4900 [Source:MGI Symbol;Acc:MGI:3646967]	3.85804	1.94787	0.000641242		Rpl19-ps1	ribosomal protein L19, pseudogene 1 [Source:MGI Symbol;Acc:MGI:3642668]	2.64155	1.40138	0.0139433
Zfp831	zinc finger protein 831 [Source:MGI Symbol;Acc:MGI:3641861]	3.85299	1.94598	0.00556047		Gm6169	predicted gene 6169 [Source:MGI Symbol;Acc:MGI:3646298]	2.59171	1.37391	0.00474898
Lratd1	LRAT domain containing 1 [Source:MGI Symbol;Acc:MGI:2145011]	3.79102	1.92258	0.00405961		Igfbp5	insulin-like growth factor binding protein 5 [Source:MGI Symbol;Acc:MGI:96440]	2.51345	1.32967	2.00005e-05
Gm14276	predicted gene 14276 [Source:MGI Symbol;Acc:MGI:3701955]	3.77588	1.91681	3.57442e-09		Gm4900	predicted gene 4900 [Source:MGI Symbol;Acc:MGI:3646967]	2.49257	1.31763	0.0127212
Rpl19-ps1	ribosomal protein L19, pseudogene 1 [Source:MGI Symbol;Acc:MGI:3642668]	3.75137	1.90742	0.00155739		Pgk1	phosphoglycerate kinase 1 [Source:MGI Symbol;Acc:MGI:97555]	2.48308	1.31213	8.13648e-06
Skap1	src family associated phosphoprotein 1 [Source:MGI Symbol;Acc:MGI:1925723]	3.74054	1.90325	0.0197487		Slc35g2	solute carrier family 35, member G2 [Source:MGI Symbol;Acc:MGI:2685365]	2.47538	1.30765	5.3688e-05
Gab2	growth factor receptor bound protein 2-associated protein 2 [Source:MGI Symbol;Acc:MGI:1333854]	3.6759	1.8781	1.89329e-31		Gm10110	predicted gene 10110 [Source:MGI Symbol;Acc:MGI:3641718]	2.47003	1.30453	0.0311882
Gm16233	predicted gene 16233 [Source:MGI Symbol;Acc:MGI:3802088]	3.65408	1.86951	0.0213613		Gm14276	predicted gene 14276 [Source:MGI Symbol;Acc:MGI:3701955]	2.46665	1.30255	0.000244541
Gm5864	predicted gene 5864 [Source:MGI Symbol;Acc:MGI:3648579]	3.60163	1.84865	0.000263862		Klri1	killer cell lectin-like receptor family I member 1 [Source:MGI Symbol;Acc:MGI:3530275]	2.45587	1.29623	0.0394618
Gm14057	predicted gene 14057 [Source:MGI Symbol;Acc:MGI:3705433]	3.39727	1.76438	0.0018082		Tmem132a	transmembrane protein 132A [Source:MGI Symbol;Acc:MGI:2147810]	2.40003	1.26305	0.00122556
Nfe2l3	nuclear factor, erythroid derived 2, like 3 [Source:MGI Symbol;Acc:MGI:1339958]	3.39104	1.76173	0.00260762		Rbm3-ps	RNA binding motif (RNP1, RRM) protein 3 [Source:MGI Symbol;Acc:MGI:3642874]	2.38947	1.25669	0.0375939
4930577N17Rik	RIKEN cDNA 4930577N17 gene [Source:MGI Symbol;Acc:MGI:1914996]	3.29797	1.72158	0.000461889		Gm42815	predicted gene 42815 [Source:MGI Symbol;Acc:MGI:5662952]	2.38613	1.25467	0.0431186
Gm42815	predicted gene 42815 [Source:MGI Symbol;Acc:MGI:5662952]	3.22264	1.68824	0.00378885		Gm8276	predicted gene 8276 [Source:MGI Symbol;Acc:MGI:3648019]	2.36179	1.23988	0.0126339
Agbl2	ATP/GTP binding protein-like 2 [Source:MGI Symbol;Acc:MGI:2443254]	3.20084	1.67845	5.56868e-10		Gm2000	predicted gene 2000 [Source:MGI Symbol;Acc:MGI:3780170]	2.36106	1.23943	0.000107365
Ano2	anoctamin 2 [Source:MGI Symbol;Acc:MGI:2387214]	3.19893	1.67759	0.00446247		Gm6210	predicted gene 6210 [Source:MGI Symbol;Acc:MGI:3643375]	2.34096	1.2271	0.00596502
B430305J03Rik	RIKEN cDNA B430305J03 gene [Source:MGI Symbol;Acc:MGI:3697707]	3.19491	1.67577	0.00120355		Hspa1l	heat shock protein 1-like [Source:MGI Symbol;Acc:MGI:96231]	2.3139	1.21033	0.000672496
Igfbp5	insulin-like growth factor binding protein 5 [Source:MGI Symbol;Acc:MGI:96440]	3.18504	1.67131	5.79548e-09		Gja4	gap junction protein, alpha 4 [Source:MGI Symbol;Acc:MGI:95715]	2.30878	1.20713	6.99443e-08
1110002J07Rik	RIKEN cDNA 1110002J07 gene [Source:MGI Symbol;Acc:MGI:1915738]	3.16531	1.66235	0.000420368		Agbl2	ATP/GTP binding protein-like 2 [Source:MGI Symbol;Acc:MGI:2443254]	2.24359	1.16581	8.60778e-05
Rbm3-ps	RNA binding motif (RNP1, RRM) protein 3 [Source:MGI Symbol;Acc:MGI:3642874]	3.14942	1.65509	0.0053127		Gm12715	predicted gene 12715 [Source:MGI Symbol;Acc:MGI:3650759]	2.23804	1.16224	0.00342888
Chst7	carbohydrate (N-acetylglucosamino) sulfotransferase 7 [Source:MGI Symbol;Acc:MGI:1891767]	3.10791	1.63595	9.45071e-05		Bean1	brain expressed, associated with Nedd4, 1 [Source:MGI Symbol;Acc:MGI:1929597]	2.22847	1.15605	0.0346237
Gm12854	predicted gene 12854 [Source:MGI Symbol;Acc:MGI:3650410]	3.09331	1.62915	0.0225113		1110002J07Rik	RIKEN cDNA 1110002J07 gene [Source:MGI Symbol;Acc:MGI:1915738]	2.22076	1.15106	0.0289119
Gm12715	predicted gene 12715 [Source:MGI Symbol;Acc:MGI:3650759]	3.07536	1.62076	2.63481e-05		Chpf	chondroitin polymerizing factor [Source:MGI Symbol;Acc:MGI:106576]	2.21096	1.14467	0.0271669
Dnajc6	DnaJ heat shock protein family (Hsp40) member C6 [Source:MGI Symbol;Acc:MGI:1919935]	3.07406	1.62015	0.018305		Zgrf1	zinc finger, GRF-type containing 1 [Source:MGI Symbol;Acc:MGI:1918893]	2.2029	1.1394	4.7705e-07
Ddx41	DEAD (Asp-Glu-Ala-Asp) box polypeptide 41 [Source:MGI Symbol;Acc:MGI:1920185]	3.06421	1.61552	3.17009e-30		Chst7	carbohydrate (N-acetylglucosamino) sulfotransferase 7 [Source:MGI Symbol;Acc:MGI:1891767]	2.18581	1.12817	0.0159914
Tmem132a	transmembrane protein 132A [Source:MGI Symbol;Acc:MGI:2147810]	3.03922	1.6037	4.82393e-06		4930577N17Rik	RIKEN cDNA 4930577N17 gene [Source:MGI Symbol;Acc:MGI:1914996]	2.16208	1.11242	0.0319056
Gm42670	predicted gene 42670 [Source:MGI Symbol;Acc:MGI:5662807]	3.03448	1.60145	0.001847		Ube2cbp	ubiquitin-conjugating enzyme E2C binding protein [Source:MGI Symbol;Acc:MGI:1917598]	2.15637	1.1086	0.00681578
Gm45472	predicted gene 45472 [Source:MGI Symbol;Acc:MGI:5791308]	2.99731	1.58367	0.0073393		Stk33	serine/threonine kinase 33 [Source:MGI Symbol;Acc:MGI:2152419]	2.15196	1.10565	0.0320607
Cmip	c-Maf inducing protein [Source:MGI Symbol;Acc:MGI:1921690]	2.94614	1.55882	6.57797e-09		Kctd17	potassium channel tetramerisation domain containing 17 [Source:MGI Symbol;Acc:MGI:1920094]	2.15023	1.10449	0.00274202
H4c9	H4 clustered histone 9 [Source:MGI Symbol;Acc:MGI:2448432]	2.93225	1.55201	0.00982331		Sms-ps	spermine synthase, pseudogene [Source:MGI Symbol;Acc:MGI:3705601]	2.14691	1.10226	0.00693031
Gm17092	predicted gene 17092 [Source:MGI Symbol;Acc:MGI:4937919]	2.93204	1.5519	0.00149872		Gm10275	predicted pseudogene 10275 [Source:MGI Symbol;Acc:MGI:3704354]	2.14213	1.09905	4.3398e-05
Rps4x-ps	Rps4x retrotransposed pseudogene [Source:MGI Symbol;Acc:MGI:3644569]	2.91	1.54102	0.0384111		Cyp4f16	cytochrome P450, family 4, subfamily f, polypeptide 16 [Source:MGI Symbol;Acc:MGI:1917351]	2.14185	1.09886	8.52652e-06
Chpf2	chondroitin polymerizing factor 2 [Source:MGI Symbol;Acc:MGI:1917522]	2.84946	1.51069	7.76669e-14		Cmip	c-Maf inducing protein [Source:MGI Symbol;Acc:MGI:1921690]	2.12979	1.09071	0.000207826
Gm45855	predicted gene 45855 [Source:MGI Symbol;Acc:MGI:5804970]	2.7985	1.48465	0.00529589		Cep72	centrosomal protein 72 [Source:MGI Symbol;Acc:MGI:1921720]	2.12756	1.0892	6.37239e-06
Stk33	serine/threonine kinase 33 [Source:MGI Symbol;Acc:MGI:2152419]	2.77768	1.47388	0.0213274		Gm6136	predicted pseudogene 6136 [Source:MGI Symbol;Acc:MGI:3646897]	2.12129	1.08494	0.00219381
Gja4	gap junction protein, alpha 4 [Source:MGI Symbol;Acc:MGI:95715]	2.76661	1.46812	4.69695e-12		Prdx4	peroxiredoxin 4 [Source:MGI Symbol;Acc:MGI:1859815]	2.1008	1.07094	3.70734e-11
Gm10254	predicted gene 10254 [Source:MGI Symbol;Acc:MGI:3708673]	2.7307	1.44927	0.0174894		Ddx41	DEAD (Asp-Glu-Ala-Asp) box polypeptide 41 [Source:MGI Symbol;Acc:MGI:1920185]	2.08641	1.06102	2.70228e-12
Kctd17	potassium channel tetramerisation domain containing 17 [Source:MGI Symbol;Acc:MGI:1920094]	2.71596	1.44146	1.24682e-05		Thg1l	tRNA-histidine guanylyltransferase 1-like (S. cerevisiae) [Source:MGI Symbol;Acc:MGI:1913878]	2.07958	1.05629	3.22482e-05
Ctsw	cathepsin W [Source:MGI Symbol;Acc:MGI:1338045]	2.71486	1.44088	0.0384627		Gm5864	predicted gene 5864 [Source:MGI Symbol;Acc:MGI:3648579]	2.07777	1.05503	0.0387557
Nme2	NME/NM23 nucleoside diphosphate kinase 2 [Source:MGI Symbol;Acc:MGI:97356]	2.66846	1.41601	1.47609e-10		Aplp1	amyloid beta (A4) precursor-like protein 1 [Source:MGI Symbol;Acc:MGI:88046]	2.07108	1.05039	0.00818672
Cep72	centrosomal protein 72 [Source:MGI Symbol;Acc:MGI:1921720]	2.66148	1.41223	4.61496e-10		Uchl1	ubiquitin carboxy-terminal hydrolase L1 [Source:MGI Symbol;Acc:MGI:103149]	2.06742	1.04783	0.000608424
Gm10110	predicted gene 10110 [Source:MGI Symbol;Acc:MGI:3641718]	2.63785	1.39936	0.017694		Nme2	NME/NM23 nucleoside diphosphate kinase 2 [Source:MGI Symbol;Acc:MGI:97356]	2.05969	1.04243	1.52464e-05
Zgrf1	zinc finger, GRF-type containing 1 [Source:MGI Symbol;Acc:MGI:1918893]	2.63607	1.39839	9.774e-11		Calm1	calmodulin 1 [Source:MGI Symbol;Acc:MGI:88251]	2.0573	1.04075	6.02699e-05
Aplp1	amyloid beta (A4) precursor-like protein 1 [Source:MGI Symbol;Acc:MGI:88046]	2.60811	1.383	0.000128012		Surf4	surfeit gene 4 [Source:MGI Symbol;Acc:MGI:98445]	2.05252	1.03739	1.97303e-09
Pola2	polymerase (DNA directed), alpha 2 [Source:MGI Symbol;Acc:MGI:99690]	2.60391	1.38068	1.04914e-12		Tspan11	tetraspanin 11 [Source:MGI Symbol;Acc:MGI:1915748]	2.04639	1.03308	0.016
Spink2	serine peptidase inhibitor, Kazal type 2 [Source:MGI Symbol;Acc:MGI:1917232]	2.6016	1.3794	0.0435871		Tubg1	tubulin, gamma 1 [Source:MGI Symbol;Acc:MGI:101834]	2.043	1.03069	1.59566e-09
Pigt	phosphatidylinositol glycan anchor biosynthesis, class T [Source:MGI Symbol;Acc:MGI:1926178]	2.58617	1.37082	2.94002e-05		Lrg1	leucine-rich alpha-2-glycoprotein 1 [Source:MGI Symbol;Acc:MGI:1924155]	2.03507	1.02508	0.0354146
Cyp4f16	cytochrome P450, family 4, subfamily f, polypeptide 16 [Source:MGI Symbol;Acc:MGI:1917351]	2.52521	1.3364	2.72103e-09		Pola2	polymerase (DNA directed), alpha 2 [Source:MGI Symbol;Acc:MGI:99690]	2.01909	1.01371	1.29073e-06
Gm6210	predicted gene 6210 [Source:MGI Symbol;Acc:MGI:3643375]	2.51346	1.32967	0.00193363		Pigt	phosphatidylinositol glycan anchor biosynthesis, class T [Source:MGI Symbol;Acc:MGI:1926178]	2.01452	1.01043	0.00525302
Chpf	chondroitin polymerizing factor [Source:MGI Symbol;Acc:MGI:106576]	2.49879	1.32123	0.00391215		Gab2	growth factor receptor bound protein 2-associated protein 2 [Source:MGI Symbol;Acc:MGI:1333854]	2.01064	1.00765	8.6383e-09
Prdx4	peroxiredoxin 4 [Source:MGI Symbol;Acc:MGI:1859815]	2.49068	1.31654	1.19149e-18		Chpf2	chondroitin polymerizing factor 2 [Source:MGI Symbol;Acc:MGI:1917522]	2.01051	1.00756	4.54451e-06
Gm10275	predicted pseudogene 10275 [Source:MGI Symbol;Acc:MGI:3704354]	2.48247	1.31178	2.59077e-07		Mfhas1	malignant fibrous histiocytoma amplified sequence 1 [Source:MGI Symbol;Acc:MGI:1098644]	2.00001	1	0.00605915
Creb3l1	cAMP responsive element binding protein 3-like 1 [Source:MGI Symbol;Acc:MGI:1347062]	2.4295	1.28066	0.010284		Pcdh11x	protocadherin 11 X-linked [Source:MGI Symbol;Acc:MGI:2442849]	0.499804	-1.00057	0.00379232
Surf4	surfeit gene 4 [Source:MGI Symbol;Acc:MGI:98445]	2.40297	1.26482	1.3096e-15		Rab2b	RAB2B, member RAS oncogene family [Source:MGI Symbol;Acc:MGI:1923588]	0.499098	-1.00261	5.48009e-10
Sim2	single-minded family bHLH transcription factor 2 [Source:MGI Symbol;Acc:MGI:98307]	2.3468	1.23069	0.0292117		Zfp977	zinc finger protein 977 [Source:MGI Symbol;Acc:MGI:3645327]	0.49896	-1.00301	0.0216044
Hspa1l	heat shock protein 1-like [Source:MGI Symbol;Acc:MGI:96231]	2.34053	1.22684	0.000236647		Zfp788	zinc finger protein 788 [Source:MGI Symbol;Acc:MGI:1914857]	0.498779	-1.00353	1.51862e-10
Galnt2	polypeptide N-acetylgalactosaminyltransferase 2 [Source:MGI Symbol;Acc:MGI:894694]	2.3311	1.22101	3.79793e-05		Kcnq1ot1	KCNQ1 overlapping transcript 1 [Source:MGI Symbol;Acc:MGI:1926855]	0.497909	-1.00604	0.000401666
Gm6169	predicted gene 6169 [Source:MGI Symbol;Acc:MGI:3646298]	2.20701	1.14209	0.0250655		Borcs5	BLOC-1 related complex subunit 5 [Source:MGI Symbol;Acc:MGI:1915024]	0.497465	-1.00733	1.14659e-05
Tubg1	tubulin, gamma 1 [Source:MGI Symbol;Acc:MGI:101834]	2.18032	1.12454	8.96737e-13		Adrb2	adrenergic receptor, beta 2 [Source:MGI Symbol;Acc:MGI:87938]	0.496275	-1.01079	2.68505e-09
Gm6136	predicted pseudogene 6136 [Source:MGI Symbol;Acc:MGI:3646897]	2.14686	1.10223	0.000528488		Nr4a1	nuclear receptor subfamily 4, group A, member 1 [Source:MGI Symbol;Acc:MGI:1352454]	0.495856	-1.01201	0.00333637
Thg1l	tRNA-histidine guanylyltransferase 1-like (S. cerevisiae) [Source:MGI Symbol;Acc:MGI:1913878]	2.13872	1.09675	2.65288e-06		Bcl7a	B cell CLL/lymphoma 7A [Source:MGI Symbol;Acc:MGI:1924295]	0.493615	-1.01854	0.000709466
Pgk1	phosphoglycerate kinase 1 [Source:MGI Symbol;Acc:MGI:97555]	2.13715	1.09569	2.895e-05		BC051226	cDNA sequence BC051226 [Source:MGI Symbol;Acc:MGI:3039585]	0.493561	-1.0187	0.000973154
Mfhas1	malignant fibrous histiocytoma amplified sequence 1 [Source:MGI Symbol;Acc:MGI:1098644]	2.12798	1.08949	0.000949219		Zmym6	zinc finger, MYM-type 6 [Source:MGI Symbol;Acc:MGI:106505]	0.492796	-1.02094	4.16884e-09
Slc35g2	solute carrier family 35, member G2 [Source:MGI Symbol;Acc:MGI:2685365]	2.1242	1.08692	0.0005448		Sipa1l2	signal-induced proliferation-associated 1 like 2 [Source:MGI Symbol;Acc:MGI:2676970]	0.492199	-1.02269	0.0117652
Sms-ps	spermine synthase, pseudogene [Source:MGI Symbol;Acc:MGI:3705601]	2.12399	1.08678	0.00311194		Spaca6	sperm acrosome associated 6 [Source:MGI Symbol;Acc:MGI:1922452]	0.49213	-1.02289	0.000422588
Uchl1	ubiquitin carboxy-terminal hydrolase L1 [Source:MGI Symbol;Acc:MGI:103149]	2.10442	1.07342	0.00010467		Gm43481	predicted gene 43481 [Source:MGI Symbol;Acc:MGI:5663618]	0.490353	-1.02811	0.0215878
Gm8276	predicted gene 8276 [Source:MGI Symbol;Acc:MGI:3648019]	2.08188	1.05789	0.0204192		Gm43059	predicted gene 43059 [Source:MGI Symbol;Acc:MGI:5663196]	0.489128	-1.03172	0.0348858
Gm2000	predicted gene 2000 [Source:MGI Symbol;Acc:MGI:3780170]	2.04952	1.03528	0.000389747		mt-Rnr2	mitochondrially encoded 16S rRNA [Source:MGI Symbol;Acc:MGI:102492]	0.487383	-1.03687	2.16465e-06
Ube2cbp	ubiquitin-conjugating enzyme E2C binding protein [Source:MGI Symbol;Acc:MGI:1917598]	2.04012	1.02866	0.00918478		Mpv17l	Mpv17 transgene, kidney disease mutant-like [Source:MGI Symbol;Acc:MGI:2135951]	0.486166	-1.04048	1.42378e-06
Calm1	calmodulin 1 [Source:MGI Symbol;Acc:MGI:88251]	2.00733	1.00527	1.63795e-05		Enpp4	ectonucleotide pyrophosphatase/phosphodiesterase 4 [Source:MGI Symbol;Acc:MGI:2682634]	0.48488	-1.0443	8.5777e-13
Gm43379	predicted gene 43379 [Source:MGI Symbol;Acc:MGI:5663516]	0.497909	-1.00605	0.000306511		Gm37968	predicted gene, 37968 [Source:MGI Symbol;Acc:MGI:5611196]	0.483265	-1.04911	0.01641
Nat8f4	N-acetyltransferase 8 (GCN5-related) family member 4 [Source:MGI Symbol;Acc:MGI:1922791]	0.496922	-1.00891	0.00369238		Grk4	G protein-coupled receptor kinase 4 [Source:MGI Symbol;Acc:MGI:95801]	0.482995	-1.04992	0.00153513
Nfia	nuclear factor I/A [Source:MGI Symbol;Acc:MGI:108056]	0.492665	-1.02132	4.68297e-07		Eml6	echinoderm microtubule associated protein like 6 [Source:MGI Symbol;Acc:MGI:2442895]	0.482626	-1.05102	3.73119e-06
Sp4	trans-acting transcription factor 4 [Source:MGI Symbol;Acc:MGI:107595]	0.488312	-1.03413	8.94598e-11		Phf1	PHD finger protein 1 [Source:MGI Symbol;Acc:MGI:98647]	0.482625	-1.05103	0.0126996
Gm43059	predicted gene 43059 [Source:MGI Symbol;Acc:MGI:5663196]	0.487816	-1.03559	0.0202012		Ogt	O-linked N-acetylglucosamine (GlcNAc) transferase (UDP-N-acetylglucosamine:polypeptide-N-acetylglucosaminyl transferase) [Source:MGI Symbol;Acc:MGI:1339639]	0.482475	-1.05147	1.6566e-09
Gm38372	predicted gene, 38372 [Source:MGI Symbol;Acc:MGI:5611600]	0.487049	-1.03786	0.0375297		2810013P06Rik	RIKEN cDNA 2810013P06 gene [Source:MGI Symbol;Acc:MGI:1914456]	0.482122	-1.05253	7.19097e-11
Gm36298	predicted gene, 36298 [Source:MGI Symbol;Acc:MGI:5595457]	0.486009	-1.04094	9.9742e-05		Gm32031	predicted gene, 32031 [Source:MGI Symbol;Acc:MGI:5591190]	0.481819	-1.05344	0.00843434
Prkcg	protein kinase C, gamma [Source:MGI Symbol;Acc:MGI:97597]	0.48531	-1.04302	0.0102307		Clk1	CDC-like kinase 1 [Source:MGI Symbol;Acc:MGI:107403]	0.481502	-1.05439	3.29906e-10
9130017K11Rik	RIKEN cDNA 9130017K11 gene [Source:MGI Symbol;Acc:MGI:1926030]	0.483268	-1.04911	0.0222944		Zfp420	zinc finger protein 420 [Source:MGI Symbol;Acc:MGI:2444666]	0.480875	-1.05627	1.53806e-06
Gm13071	predicted gene 13071 [Source:MGI Symbol;Acc:MGI:3651971]	0.480068	-1.05869	0.0239879		Zfp950	zinc finger protein 950 [Source:MGI Symbol;Acc:MGI:2652824]	0.480191	-1.05832	1.16608e-09
Npr2	natriuretic peptide receptor 2 [Source:MGI Symbol;Acc:MGI:97372]	0.47708	-1.0677	0.00683349		Gm17024	predicted gene 17024 [Source:MGI Symbol;Acc:MGI:4937851]	0.479862	-1.05931	0.0140585
Chst1	carbohydrate sulfotransferase 1 [Source:MGI Symbol;Acc:MGI:1924219]	0.476292	-1.07008	0.00120087		Irs1	insulin receptor substrate 1 [Source:MGI Symbol;Acc:MGI:99454]	0.478342	-1.06388	1.01078e-05
Phf1	PHD finger protein 1 [Source:MGI Symbol;Acc:MGI:98647]	0.47616	-1.07048	0.00481896		Gm38057	predicted gene, 38057 [Source:MGI Symbol;Acc:MGI:5611285]	0.478323	-1.06394	0.0163831
Zfp945	zinc finger protein 945 [Source:MGI Symbol;Acc:MGI:2445132]	0.471515	-1.08462	9.23007e-10		Tmem170	transmembrane protein 170 [Source:MGI Symbol;Acc:MGI:106426]	0.476726	-1.06877	1.74855e-09
4833412K13Rik	RIKEN cDNA 4833412K13 gene [Source:MGI Symbol;Acc:MGI:1921857]	0.466379	-1.10043	0.0206175		Slc10a6	solute carrier family 10 (sodium/bile acid cotransporter family), member 6 [Source:MGI Symbol;Acc:MGI:1923000]	0.47528	-1.07315	0.00724191
Borcs5	BLOC-1 related complex subunit 5 [Source:MGI Symbol;Acc:MGI:1915024]	0.464605	-1.10592	1.65326e-07		Tmem116	transmembrane protein 116 [Source:MGI Symbol;Acc:MGI:1924712]	0.47371	-1.07792	0.0364058
4632427E13Rik	RIKEN cDNA 4632427E13 gene [Source:MGI Symbol;Acc:MGI:1915436]	0.46328	-1.11004	1.49985e-06		4632427E13Rik	RIKEN cDNA 4632427E13 gene [Source:MGI Symbol;Acc:MGI:1915436]	0.47365	-1.07811	8.93475e-06
Gm45769	predicted gene 45769 [Source:MGI Symbol;Acc:MGI:5804884]	0.458582	-1.12475	0.000479225		Gm25082	predicted gene, 25082 [Source:MGI Symbol;Acc:MGI:5454859]	0.47364	-1.07814	0.0271602
Zfp420	zinc finger protein 420 [Source:MGI Symbol;Acc:MGI:2444666]	0.456782	-1.13042	2.61198e-08		C730034F03Rik	RIKEN cDNA C730034F03 gene [Source:MGI Symbol;Acc:MGI:2441921]	0.47311	-1.07975	0.00841193
Trim7	tripartite motif-containing 7 [Source:MGI Symbol;Acc:MGI:2137353]	0.454456	-1.13779	0.00254451		Gm43379	predicted gene 43379 [Source:MGI Symbol;Acc:MGI:5663516]	0.472099	-1.08284	0.000388018
6430573P05Rik	RIKEN cDNA 6430573P05 gene [Source:MGI Symbol;Acc:MGI:2686494]	0.453879	-1.13962	0.0123377		Gm43437	predicted gene 43437 [Source:MGI Symbol;Acc:MGI:5663574]	0.471365	-1.08508	0.00725391
Gm38020	predicted gene, 38020 [Source:MGI Symbol;Acc:MGI:5611248]	0.452387	-1.14437	0.00249185		Gm43597	predicted gene 43597 [Source:MGI Symbol;Acc:MGI:5663734]	0.471021	-1.08614	8.83409e-05
Gm26703	predicted gene, 26703 [Source:MGI Symbol;Acc:MGI:5477197]	0.449962	-1.15212	0.0330844		Qk	quaking [Source:MGI Symbol;Acc:MGI:97837]	0.470329	-1.08826	0.000227396
Ogt	O-linked N-acetylglucosamine (GlcNAc) transferase (UDP-N-acetylglucosamine:polypeptide-N-acetylglucosaminyl transferase) [Source:MGI Symbol;Acc:MGI:1339639]	0.447823	-1.159	8.76697e-13		1810026B05Rik	RIKEN cDNA 1810026B05 gene [Source:MGI Symbol;Acc:MGI:1916420]	0.469881	-1.08963	1.58805e-10
Pirt	phosphoinositide-interacting regulator of transient receptor potential channels [Source:MGI Symbol;Acc:MGI:2443635]	0.446668	-1.16273	0.0437395		Per2	period circadian clock 2 [Source:MGI Symbol;Acc:MGI:1195265]	0.469858	-1.0897	0.0214034
Tmem170	transmembrane protein 170 [Source:MGI Symbol;Acc:MGI:106426]	0.446241	-1.16411	2.66108e-12		Mfsd7a	major facilitator superfamily domain containing 7A [Source:MGI Symbol;Acc:MGI:2442629]	0.469377	-1.09118	1.58078e-06
Gm36936	predicted gene, 36936 [Source:MGI Symbol;Acc:MGI:5610164]	0.446172	-1.16433	2.56724e-05		Pnisr	PNN interacting serine/arginine-rich [Source:MGI Symbol;Acc:MGI:1913875]	0.467651	-1.0965	4.48111e-09
Pcdh11x	protocadherin 11 X-linked [Source:MGI Symbol;Acc:MGI:2442849]	0.442207	-1.1772	0.000124726		Gm37309	predicted gene, 37309 [Source:MGI Symbol;Acc:MGI:5610537]	0.465173	-1.10416	0.000579508
Enpp4	ectonucleotide pyrophosphatase/phosphodiesterase 4 [Source:MGI Symbol;Acc:MGI:2682634]	0.43246	-1.20936	1.93283e-19		6430573P05Rik	RIKEN cDNA 6430573P05 gene [Source:MGI Symbol;Acc:MGI:2686494]	0.465071	-1.10448	0.0285498
Gm16364	predicted gene 16364 [Source:MGI Symbol;Acc:MGI:3840142]	0.430356	-1.2164	0.000914051		Dtd1	D-tyrosyl-tRNA deacylase 1 [Source:MGI Symbol;Acc:MGI:1913294]	0.464788	-1.10536	4.00666e-10
Gm37397	predicted gene, 37397 [Source:MGI Symbol;Acc:MGI:5610625]	0.430187	-1.21696	0.00346206		Tmem117	transmembrane protein 117 [Source:MGI Symbol;Acc:MGI:2444580]	0.464329	-1.10678	0.00129037
Gm15265	predicted gene 15265 [Source:MGI Symbol;Acc:MGI:3705193]	0.428629	-1.2222	0.00234355		Morn1	MORN repeat containing 1 [Source:MGI Symbol;Acc:MGI:1924116]	0.463634	-1.10894	8.90093e-05
A430035B10Rik	RIKEN cDNA A430035B10 gene [Source:MGI Symbol;Acc:MGI:2443789]	0.428511	-1.2226	0.000452267		6720427I07Rik	RIKEN cDNA 6720427I07 gene [Source:MGI Symbol;Acc:MGI:1924398]	0.461549	-1.11544	1.55491e-07
Tmem116	transmembrane protein 116 [Source:MGI Symbol;Acc:MGI:1924712]	0.424908	-1.23478	0.00611831		Npr2	natriuretic peptide receptor 2 [Source:MGI Symbol;Acc:MGI:97372]	0.455592	-1.13418	0.00872027
Rab2b	RAB2B, member RAS oncogene family [Source:MGI Symbol;Acc:MGI:1923588]	0.423677	-1.23896	5.2787e-17		Gm38020	predicted gene, 38020 [Source:MGI Symbol;Acc:MGI:5611248]	0.455083	-1.1358	0.00266155
Epb41l2	erythrocyte membrane protein band 4.1 like 2 [Source:MGI Symbol;Acc:MGI:103009]	0.422937	-1.24149	2.0927e-21		Epb41l2	erythrocyte membrane protein band 4.1 like 2 [Source:MGI Symbol;Acc:MGI:103009]	0.454413	-1.13792	1.20523e-15
Gm37249	predicted gene, 37249 [Source:MGI Symbol;Acc:MGI:5610477]	0.419879	-1.25196	0.0394887		Gm36298	predicted gene, 36298 [Source:MGI Symbol;Acc:MGI:5595457]	0.453779	-1.13994	0.000115713
Eml6	echinoderm microtubule associated protein like 6 [Source:MGI Symbol;Acc:MGI:2442895]	0.4198	-1.25223	2.63285e-09		Gm45501	predicted gene 45501 [Source:MGI Symbol;Acc:MGI:5791337]	0.453267	-1.14157	0.00114159
Morn1	MORN repeat containing 1 [Source:MGI Symbol;Acc:MGI:1924116]	0.419359	-1.25374	7.57269e-07		Ppm1l	protein phosphatase 1 (formerly 2C)-like [Source:MGI Symbol;Acc:MGI:2139740]	0.453259	-1.14159	0.00136164
Zfp950	zinc finger protein 950 [Source:MGI Symbol;Acc:MGI:2652824]	0.419308	-1.25392	9.07907e-15		Sp4	trans-acting transcription factor 4 [Source:MGI Symbol;Acc:MGI:107595]	0.451018	-1.14874	1.17399e-11
1810026B05Rik	RIKEN cDNA 1810026B05 gene [Source:MGI Symbol;Acc:MGI:1916420]	0.419075	-1.25472	3.16146e-15		1700012D14Rik	RIKEN cDNA 1700012D14 gene [Source:MGI Symbol;Acc:MGI:1922729]	0.450606	-1.15006	0.00417896
C730034F03Rik	RIKEN cDNA C730034F03 gene [Source:MGI Symbol;Acc:MGI:2441921]	0.418285	-1.25744	0.000820377		Gm15265	predicted gene 15265 [Source:MGI Symbol;Acc:MGI:3705193]	0.448185	-1.15783	0.00651764
Zfp788	zinc finger protein 788 [Source:MGI Symbol;Acc:MGI:1914857]	0.417072	-1.26163	2.10731e-18		Kcnh8	potassium voltage-gated channel, subfamily H (eag-related), member 8 [Source:MGI Symbol;Acc:MGI:2445160]	0.446535	-1.16315	0.0438698
Cpne5	copine V [Source:MGI Symbol;Acc:MGI:2385908]	0.416575	-1.26335	0.00622865		Gm15506	predicted gene 15506 [Source:MGI Symbol;Acc:MGI:3782954]	0.445651	-1.16601	0.0142157
Klhl3	kelch-like 3 [Source:MGI Symbol;Acc:MGI:2445185]	0.414932	-1.26905	0.000202201		Gm20597	predicted gene, 20597 [Source:MGI Symbol;Acc:MGI:5295703]	0.445315	-1.1671	0.000186141
Ifit1bl2	interferon induced protein with tetratricopeptide repeats 1B like 2 [Source:MGI Symbol;Acc:MGI:2148249]	0.413339	-1.2746	0.000203317		Ino80dos	INO80 complex subunit D, opposite strand [Source:MGI Symbol;Acc:MGI:3651861]	0.443622	-1.1726	3.55924e-05
Tmsb15b1	thymosin beta 15b1 [Source:MGI Symbol;Acc:MGI:3843059]	0.412459	-1.27768	0.00325644		Chst1	carbohydrate sulfotransferase 1 [Source:MGI Symbol;Acc:MGI:1924219]	0.439358	-1.18653	0.000992519
Bcl7a	B cell CLL/lymphoma 7A [Source:MGI Symbol;Acc:MGI:1924295]	0.412031	-1.27917	2.54486e-06		Zfp945	zinc finger protein 945 [Source:MGI Symbol;Acc:MGI:2445132]	0.438632	-1.18892	4.68758e-10
P3h2	prolyl 3-hydroxylase 2 [Source:MGI Symbol;Acc:MGI:2146663]	0.411901	-1.27963	0.00123726		P3h2	prolyl 3-hydroxylase 2 [Source:MGI Symbol;Acc:MGI:2146663]	0.438045	-1.19085	0.00652221
Etnk2	ethanolamine kinase 2 [Source:MGI Symbol;Acc:MGI:2443760]	0.41184	-1.27984	0.00508238		Plxna3	plexin A3 [Source:MGI Symbol;Acc:MGI:107683]	0.437989	-1.19103	0.00151724
Gm42879	predicted gene 42879 [Source:MGI Symbol;Acc:MGI:5663016]	0.411787	-1.28003	0.0497897		Tcea2	transcription elongation factor A (SII), 2 [Source:MGI Symbol;Acc:MGI:107368]	0.437495	-1.19266	2.39055e-06
Gm44597	predicted gene 44597 [Source:MGI Symbol;Acc:MGI:5753173]	0.410909	-1.28311	0.00346682		Gm45769	predicted gene 45769 [Source:MGI Symbol;Acc:MGI:5804884]	0.437227	-1.19355	0.000141155
Spaca6	sperm acrosome associated 6 [Source:MGI Symbol;Acc:MGI:1922452]	0.410821	-1.28342	1.38879e-06		Nfia	nuclear factor I/A [Source:MGI Symbol;Acc:MGI:108056]	0.435495	-1.19927	3.99145e-08
Tmco4	transmembrane and coiled-coil domains 4 [Source:MGI Symbol;Acc:MGI:1924306]	0.409714	-1.28731	6.74565e-11		Igip	IgA inducing protein [Source:MGI Symbol;Acc:MGI:1924271]	0.434939	-1.20111	9.48227e-07
2810410L24Rik	RIKEN cDNA 2810410L24 gene [Source:MGI Symbol;Acc:MGI:1923627]	0.409713	-1.28731	0.000629239		A430035B10Rik	RIKEN cDNA A430035B10 gene [Source:MGI Symbol;Acc:MGI:2443789]	0.432356	-1.20971	0.00129889
Gm32031	predicted gene, 32031 [Source:MGI Symbol;Acc:MGI:5591190]	0.408059	-1.29315	0.000985181		Plekha7	pleckstrin homology domain containing, family A member 7 [Source:MGI Symbol;Acc:MGI:2445094]	0.432345	-1.20975	0.000959219
BC051226	cDNA sequence BC051226 [Source:MGI Symbol;Acc:MGI:3039585]	0.405372	-1.30268	2.6963e-06		Gm13403	predicted gene 13403 [Source:MGI Symbol;Acc:MGI:3649380]	0.431395	-1.21292	0.00751102
Clk1	CDC-like kinase 1 [Source:MGI Symbol;Acc:MGI:107403]	0.40438	-1.30622	4.2053e-17		Csmd1	CUB and Sushi multiple domains 1 [Source:MGI Symbol;Acc:MGI:2137383]	0.429684	-1.21865	0.00156886
C230062I16Rik	RIKEN cDNA C230062I16 gene [Source:MGI Symbol;Acc:MGI:2442417]	0.404331	-1.30639	0.00298096		Sim2	single-minded family bHLH transcription factor 2 [Source:MGI Symbol;Acc:MGI:98307]	0.428699	-1.22196	0.0277026
Ctns	cystinosis, nephropathic [Source:MGI Symbol;Acc:MGI:1932872]	0.40229	-1.31369	9.53943e-09		Prkcg	protein kinase C, gamma [Source:MGI Symbol;Acc:MGI:97597]	0.428656	-1.22211	0.00241871
Zmym6	zinc finger, MYM-type 6 [Source:MGI Symbol;Acc:MGI:106505]	0.402112	-1.31433	1.67938e-16		2810410L24Rik	RIKEN cDNA 2810410L24 gene [Source:MGI Symbol;Acc:MGI:1923627]	0.42729	-1.22671	0.00246201
Gk5	glycerol kinase 5 (putative) [Source:MGI Symbol;Acc:MGI:2443336]	0.401925	-1.315	2.92668e-16		Klhl3	kelch-like 3 [Source:MGI Symbol;Acc:MGI:2445185]	0.426266	-1.23017	0.000907636
Gm17024	predicted gene 17024 [Source:MGI Symbol;Acc:MGI:4937851]	0.401588	-1.31621	0.00228856		2510017J16Rik	RIKEN cDNA 2510017J16 gene [Source:MGI Symbol;Acc:MGI:1913824]	0.424941	-1.23466	0.0498639
Slc10a6	solute carrier family 10 (sodium/bile acid cotransporter family), member 6 [Source:MGI Symbol;Acc:MGI:1923000]	0.401545	-1.31637	0.000235781		1300014J16Rik	RIKEN cDNA 1300014J16 gene [Source:MGI Symbol;Acc:MGI:1921410]	0.422416	-1.24326	0.0108524
Gm43858	predicted gene 43858 [Source:MGI Symbol;Acc:MGI:5663995]	0.401459	-1.31668	1.14981e-05		Gm42878	predicted gene 42878 [Source:MGI Symbol;Acc:MGI:5663015]	0.4224	-1.24332	0.0498639
1300014J16Rik	RIKEN cDNA 1300014J16 gene [Source:MGI Symbol;Acc:MGI:1921410]	0.397627	-1.33051	0.00353792		Inka2	inka box actin regulator 2 [Source:MGI Symbol;Acc:MGI:1923497]	0.421824	-1.24529	2.37642e-06
Spata1	spermatogenesis associated 1 [Source:MGI Symbol;Acc:MGI:1918201]	0.397378	-1.33142	1.96346e-07		D430040D24Rik	RIKEN cDNA D430040D24 gene [Source:MGI Symbol;Acc:MGI:2442526]	0.421654	-1.24587	0.0156223
6720427I07Rik	RIKEN cDNA 6720427I07 gene [Source:MGI Symbol;Acc:MGI:1924398]	0.396726	-1.33379	5.2039e-11		Tesk2	testis-specific kinase 2 [Source:MGI Symbol;Acc:MGI:2385204]	0.420075	-1.25128	0.000138036
Tas1r3	taste receptor, type 1, member 3 [Source:MGI Symbol;Acc:MGI:1933547]	0.396228	-1.3356	0.0313706		Gk5	glycerol kinase 5 (putative) [Source:MGI Symbol;Acc:MGI:2443336]	0.418613	-1.25631	4.53539e-13
mt-Rnr2	mitochondrially encoded 16S rRNA [Source:MGI Symbol;Acc:MGI:102492]	0.393852	-1.34427	7.11445e-12		Sh2d4b	SH2 domain containing 4B [Source:MGI Symbol;Acc:MGI:1925182]	0.418397	-1.25706	0.00832285
1700096K18Rik	RIKEN cDNA 1700096K18 gene [Source:MGI Symbol;Acc:MGI:1920821]	0.391799	-1.35181	6.54066e-07		Gm28151	predicted gene 28151 [Source:MGI Symbol;Acc:MGI:5578857]	0.417974	-1.25851	0.00150127
Adrb2	adrenergic receptor, beta 2 [Source:MGI Symbol;Acc:MGI:87938]	0.391077	-1.35448	1.08492e-17		Prox2os	prospero homeobox 2 opposite strand [Source:MGI Symbol;Acc:MGI:5011542]	0.414572	-1.2703	0.0131146
Gm42742	predicted gene 42742 [Source:MGI Symbol;Acc:MGI:5662879]	0.387934	-1.36612	0.0204341		Trim7	tripartite motif-containing 7 [Source:MGI Symbol;Acc:MGI:2137353]	0.413927	-1.27255	0.000956194
Irs1	insulin receptor substrate 1 [Source:MGI Symbol;Acc:MGI:99454]	0.387083	-1.36929	3.41265e-10		E230016M11Rik	RIKEN cDNA E230016M11 gene [Source:MGI Symbol;Acc:MGI:2443524]	0.413289	-1.27478	0.00360234
Gm48804	predicted gene, 48804 [Source:MGI Symbol;Acc:MGI:6098514]	0.386401	-1.37183	0.0166346		Slc12a5	solute carrier family 12, member 5 [Source:MGI Symbol;Acc:MGI:1862037]	0.413198	-1.27509	0.0049936
Fzd10os	frizzled class receptor 10, opposite strand [Source:MGI Symbol;Acc:MGI:2442398]	0.385404	-1.37556	0.0263451		Gm43858	predicted gene 43858 [Source:MGI Symbol;Acc:MGI:5663995]	0.412802	-1.27648	9.46825e-05
Gm15506	predicted gene 15506 [Source:MGI Symbol;Acc:MGI:3782954]	0.385246	-1.37615	0.000756414		NA	NA	0.411861	-1.27977	0.00643017
2810013P06Rik	RIKEN cDNA 2810013P06 gene [Source:MGI Symbol;Acc:MGI:1914456]	0.38446	-1.3791	7.41558e-20		Gm36936	predicted gene, 36936 [Source:MGI Symbol;Acc:MGI:5610164]	0.409853	-1.28682	9.72577e-06
1700012D14Rik	RIKEN cDNA 1700012D14 gene [Source:MGI Symbol;Acc:MGI:1922729]	0.379792	-1.39672	0.000319709		Gm38375	predicted gene, 38375 [Source:MGI Symbol;Acc:MGI:5611603]	0.408102	-1.293	0.00504093
Slc12a5	solute carrier family 12, member 5 [Source:MGI Symbol;Acc:MGI:1862037]	0.379275	-1.39869	0.00133442		Gm26944	predicted gene, 26944 [Source:MGI Symbol;Acc:MGI:5504059]	0.407536	-1.295	0.0014186
Ino80dos	INO80 complex subunit D, opposite strand [Source:MGI Symbol;Acc:MGI:3651861]	0.378559	-1.40141	6.45026e-08		NA	NA	0.407393	-1.29551	1.78245e-06
Purg	purine-rich element binding protein G [Source:MGI Symbol;Acc:MGI:1922279]	0.375355	-1.41367	6.0086e-09		Spata1	spermatogenesis associated 1 [Source:MGI Symbol;Acc:MGI:1918201]	0.406511	-1.29863	2.27328e-06
Grk4	G protein-coupled receptor kinase 4 [Source:MGI Symbol;Acc:MGI:95801]	0.374167	-1.41825	1.80472e-06		Prex2	phosphatidylinositol-3,4,5-trisphosphate-dependent Rac exchange factor 2 [Source:MGI Symbol;Acc:MGI:1923385]	0.406503	-1.29866	1.5844e-14
Pnisr	PNN interacting serine/arginine-rich [Source:MGI Symbol;Acc:MGI:1913875]	0.370905	-1.43088	1.24573e-16		Jpx	Jpx transcript, Xist activator (non-protein coding) [Source:MGI Symbol;Acc:MGI:2180008]	0.406061	-1.30023	1.51123e-06
Tenm1	teneurin transmembrane protein 1 [Source:MGI Symbol;Acc:MGI:1345185]	0.368652	-1.43967	0.0333979		Cyp7b1	cytochrome P450, family 7, subfamily b, polypeptide 1 [Source:MGI Symbol;Acc:MGI:104978]	0.403889	-1.30797	2.53768e-09
Gm44164	predicted gene, 44164 [Source:MGI Symbol;Acc:MGI:5690556]	0.367038	-1.446	0.00100399		4833412K13Rik	RIKEN cDNA 4833412K13 gene [Source:MGI Symbol;Acc:MGI:1921857]	0.401669	-1.31592	0.00832455
Mfsd7a	major facilitator superfamily domain containing 7A [Source:MGI Symbol;Acc:MGI:2442629]	0.365839	-1.45072	6.88782e-12		Etnk2	ethanolamine kinase 2 [Source:MGI Symbol;Acc:MGI:2443760]	0.4009	-1.31869	0.00578157
Gm38375	predicted gene, 38375 [Source:MGI Symbol;Acc:MGI:5611603]	0.364597	-1.45562	0.000820377		Gm37303	predicted gene, 37303 [Source:MGI Symbol;Acc:MGI:5610531]	0.399913	-1.32224	0.00319304
Tmod2	tropomodulin 2 [Source:MGI Symbol;Acc:MGI:1355335]	0.361028	-1.46982	1.69172e-10		Slc35f1	solute carrier family 35, member F1 [Source:MGI Symbol;Acc:MGI:2139810]	0.399818	-1.32258	0.00054353
Gm36944	predicted gene, 36944 [Source:MGI Symbol;Acc:MGI:5610172]	0.360485	-1.47199	0.00360102		Tmod2	tropomodulin 2 [Source:MGI Symbol;Acc:MGI:1355335]	0.398036	-1.32903	1.36255e-07
Ifit3	interferon-induced protein with tetratricopeptide repeats 3 [Source:MGI Symbol;Acc:MGI:1101055]	0.358948	-1.47815	8.92202e-08		Gm42742	predicted gene 42742 [Source:MGI Symbol;Acc:MGI:5662879]	0.397859	-1.32967	0.0353728
Gm14379	predicted gene 14379 [Source:MGI Symbol;Acc:MGI:3649346]	0.357166	-1.48533	0.010138		C230062I16Rik	RIKEN cDNA C230062I16 gene [Source:MGI Symbol;Acc:MGI:2442417]	0.39765	-1.33043	0.00567324
Eif4ebp3	eukaryotic translation initiation factor 4E binding protein 3 [Source:MGI Symbol;Acc:MGI:1270847]	0.355292	-1.49292	0.0111126		Purg	purine-rich element binding protein G [Source:MGI Symbol;Acc:MGI:1922279]	0.396264	-1.33547	6.83665e-07
3 day cut aged c-Jun OE/+ vs UI
Gene		Fold Change	log Fold Change	Adjusted p Value
Crhbp	corticotropin releasing hormone binding protein [Source:MGI Symbol;Acc:MGI:88497]	27.3762	4.77485	7.95928e-05
Gm8091	predicted gene 8091 [Source:MGI Symbol;Acc:MGI:3643169]	15.6407	3.96724	0.00813309
Rhd	Rh blood group, D antigen [Source:MGI Symbol;Acc:MGI:1202882]	14.0527	3.81278	0.000665013
Gm16233	predicted gene 16233 [Source:MGI Symbol;Acc:MGI:3802088]	9.95911	3.31602	9.32031e-05
Spink2	serine peptidase inhibitor, Kazal type 2 [Source:MGI Symbol;Acc:MGI:1917232]	9.23132	3.20654	0.000477873
Kcns1	K+ voltage-gated channel, subfamily S, 1 [Source:MGI Symbol;Acc:MGI:1197019]	7.18375	2.84474	0.000690988
Gm14057	predicted gene 14057 [Source:MGI Symbol;Acc:MGI:3705433]	6.66475	2.73655	5.64054e-07
Slco4c1	solute carrier organic anion transporter family, member 4C1 [Source:MGI Symbol;Acc:MGI:2442784]	6.25707	2.64549	0.000114847
Hapln4	hyaluronan and proteoglycan link protein 4 [Source:MGI Symbol;Acc:MGI:2679531]	4.22759	2.07984	0.0218938
Dppa3	developmental pluripotency-associated 3 [Source:MGI Symbol;Acc:MGI:1920958]	3.98563	1.99481	0.0101162
Sytl5	synaptotagmin-like 5 [Source:MGI Symbol;Acc:MGI:2668451]	3.7864	1.92083	0.00641288
F9	coagulation factor IX [Source:MGI Symbol;Acc:MGI:88384]	3.68522	1.88175	0.00975112
Hsd11b2	hydroxysteroid 11-beta dehydrogenase 2 [Source:MGI Symbol;Acc:MGI:104720]	3.67812	1.87897	0.0213021
Gm12854	predicted gene 12854 [Source:MGI Symbol;Acc:MGI:3650410]	3.67099	1.87617	0.00524686
Il1r2	interleukin 1 receptor, type II [Source:MGI Symbol;Acc:MGI:96546]	3.43632	1.78086	0.00616695
B430305J03Rik	RIKEN cDNA B430305J03 gene [Source:MGI Symbol;Acc:MGI:3697707]	3.4356	1.78056	0.00148025
Gm42670	predicted gene 42670 [Source:MGI Symbol;Acc:MGI:5662807]	3.39879	1.76502	0.00536998
1810008B01Rik	RIKEN cDNA 1810008B01 gene [Source:MGI Symbol;Acc:MGI:1916312]	3.28981	1.718	0.0187326
Olig1	oligodendrocyte transcription factor 1 [Source:MGI Symbol;Acc:MGI:1355334]	3.25397	1.7022	0.00122018
Barx2	BarH-like homeobox 2 [Source:MGI Symbol;Acc:MGI:109617]	3.18617	1.67182	0.0391028
Gm45855	predicted gene 45855 [Source:MGI Symbol;Acc:MGI:5804970]	3.11958	1.64135	0.00535926
Galnt2	polypeptide N-acetylgalactosaminyltransferase 2 [Source:MGI Symbol;Acc:MGI:894694]	3.09243	1.62874	3.32133e-07
Gm45472	predicted gene 45472 [Source:MGI Symbol;Acc:MGI:5791308]	3.0745	1.62035	0.0131786
Nfe2l3	nuclear factor, erythroid derived 2, like 3 [Source:MGI Symbol;Acc:MGI:1339958]	2.98413	1.57731	0.0242472
Rps4x-ps	Rps4x retrotransposed pseudogene [Source:MGI Symbol;Acc:MGI:3644569]	2.8974	1.53476	0.0436221
Gm10254	predicted gene 10254 [Source:MGI Symbol;Acc:MGI:3708673]	2.88685	1.5295	0.0261381
H4c9	H4 clustered histone 9 [Source:MGI Symbol;Acc:MGI:2448432]	2.67052	1.41712	0.0443455
Gm17092	predicted gene 17092 [Source:MGI Symbol;Acc:MGI:4937919]	2.64488	1.4032	0.0125048
Creb3l1	cAMP responsive element binding protein 3-like 1 [Source:MGI Symbol;Acc:MGI:1347062]	2.64303	1.40219	0.0116913
Rpl19-ps1	ribosomal protein L19, pseudogene 1 [Source:MGI Symbol;Acc:MGI:3642668]	2.64155	1.40138	0.0139433
Gm6169	predicted gene 6169 [Source:MGI Symbol;Acc:MGI:3646298]	2.59171	1.37391	0.00474898
Igfbp5	insulin-like growth factor binding protein 5 [Source:MGI Symbol;Acc:MGI:96440]	2.51345	1.32967	2.00005e-05
Gm4900	predicted gene 4900 [Source:MGI Symbol;Acc:MGI:3646967]	2.49257	1.31763	0.0127212
Pgk1	phosphoglycerate kinase 1 [Source:MGI Symbol;Acc:MGI:97555]	2.48308	1.31213	8.13648e-06
Slc35g2	solute carrier family 35, member G2 [Source:MGI Symbol;Acc:MGI:2685365]	2.47538	1.30765	5.3688e-05
Gm10110	predicted gene 10110 [Source:MGI Symbol;Acc:MGI:3641718]	2.47003	1.30453	0.0311882
Gm14276	predicted gene 14276 [Source:MGI Symbol;Acc:MGI:3701955]	2.46665	1.30255	0.000244541
Klri1	killer cell lectin-like receptor family I member 1 [Source:MGI Symbol;Acc:MGI:3530275]	2.45587	1.29623	0.0394618
Tmem132a	transmembrane protein 132A [Source:MGI Symbol;Acc:MGI:2147810]	2.40003	1.26305	0.00122556
Rbm3-ps	RNA binding motif (RNP1, RRM) protein 3 [Source:MGI Symbol;Acc:MGI:3642874]	2.38947	1.25669	0.0375939
Gm42815	predicted gene 42815 [Source:MGI Symbol;Acc:MGI:5662952]	2.38613	1.25467	0.0431186
Gm8276	predicted gene 8276 [Source:MGI Symbol;Acc:MGI:3648019]	2.36179	1.23988	0.0126339
Gm2000	predicted gene 2000 [Source:MGI Symbol;Acc:MGI:3780170]	2.36106	1.23943	0.000107365
Gm6210	predicted gene 6210 [Source:MGI Symbol;Acc:MGI:3643375]	2.34096	1.2271	0.00596502
Hspa1l	heat shock protein 1-like [Source:MGI Symbol;Acc:MGI:96231]	2.3139	1.21033	0.000672496
Gja4	gap junction protein, alpha 4 [Source:MGI Symbol;Acc:MGI:95715]	2.30878	1.20713	6.99443e-08
Agbl2	ATP/GTP binding protein-like 2 [Source:MGI Symbol;Acc:MGI:2443254]	2.24359	1.16581	8.60778e-05
Gm12715	predicted gene 12715 [Source:MGI Symbol;Acc:MGI:3650759]	2.23804	1.16224	0.00342888
Bean1	brain expressed, associated with Nedd4, 1 [Source:MGI Symbol;Acc:MGI:1929597]	2.22847	1.15605	0.0346237
1110002J07Rik	RIKEN cDNA 1110002J07 gene [Source:MGI Symbol;Acc:MGI:1915738]	2.22076	1.15106	0.0289119
Chpf	chondroitin polymerizing factor [Source:MGI Symbol;Acc:MGI:106576]	2.21096	1.14467	0.0271669
Zgrf1	zinc finger, GRF-type containing 1 [Source:MGI Symbol;Acc:MGI:1918893]	2.2029	1.1394	4.7705e-07
Chst7	carbohydrate (N-acetylglucosamino) sulfotransferase 7 [Source:MGI Symbol;Acc:MGI:1891767]	2.18581	1.12817	0.0159914
4930577N17Rik	RIKEN cDNA 4930577N17 gene [Source:MGI Symbol;Acc:MGI:1914996]	2.16208	1.11242	0.0319056
Ube2cbp	ubiquitin-conjugating enzyme E2C binding protein [Source:MGI Symbol;Acc:MGI:1917598]	2.15637	1.1086	0.00681578
Stk33	serine/threonine kinase 33 [Source:MGI Symbol;Acc:MGI:2152419]	2.15196	1.10565	0.0320607
Kctd17	potassium channel tetramerisation domain containing 17 [Source:MGI Symbol;Acc:MGI:1920094]	2.15023	1.10449	0.00274202
Sms-ps	spermine synthase, pseudogene [Source:MGI Symbol;Acc:MGI:3705601]	2.14691	1.10226	0.00693031
Gm10275	predicted pseudogene 10275 [Source:MGI Symbol;Acc:MGI:3704354]	2.14213	1.09905	4.3398e-05
Cyp4f16	cytochrome P450, family 4, subfamily f, polypeptide 16 [Source:MGI Symbol;Acc:MGI:1917351]	2.14185	1.09886	8.52652e-06
Cmip	c-Maf inducing protein [Source:MGI Symbol;Acc:MGI:1921690]	2.12979	1.09071	0.000207826
Cep72	centrosomal protein 72 [Source:MGI Symbol;Acc:MGI:1921720]	2.12756	1.0892	6.37239e-06
Gm6136	predicted pseudogene 6136 [Source:MGI Symbol;Acc:MGI:3646897]	2.12129	1.08494	0.00219381
Prdx4	peroxiredoxin 4 [Source:MGI Symbol;Acc:MGI:1859815]	2.1008	1.07094	3.70734e-11
Ddx41	DEAD (Asp-Glu-Ala-Asp) box polypeptide 41 [Source:MGI Symbol;Acc:MGI:1920185]	2.08641	1.06102	2.70228e-12
Thg1l	tRNA-histidine guanylyltransferase 1-like (S. cerevisiae) [Source:MGI Symbol;Acc:MGI:1913878]	2.07958	1.05629	3.22482e-05
Gm5864	predicted gene 5864 [Source:MGI Symbol;Acc:MGI:3648579]	2.07777	1.05503	0.0387557
Aplp1	amyloid beta (A4) precursor-like protein 1 [Source:MGI Symbol;Acc:MGI:88046]	2.07108	1.05039	0.00818672
Uchl1	ubiquitin carboxy-terminal hydrolase L1 [Source:MGI Symbol;Acc:MGI:103149]	2.06742	1.04783	0.000608424
Nme2	NME/NM23 nucleoside diphosphate kinase 2 [Source:MGI Symbol;Acc:MGI:97356]	2.05969	1.04243	1.52464e-05
Calm1	calmodulin 1 [Source:MGI Symbol;Acc:MGI:88251]	2.0573	1.04075	6.02699e-05
Surf4	surfeit gene 4 [Source:MGI Symbol;Acc:MGI:98445]	2.05252	1.03739	1.97303e-09
Tspan11	tetraspanin 11 [Source:MGI Symbol;Acc:MGI:1915748]	2.04639	1.03308	0.016
Tubg1	tubulin, gamma 1 [Source:MGI Symbol;Acc:MGI:101834]	2.043	1.03069	1.59566e-09
Lrg1	leucine-rich alpha-2-glycoprotein 1 [Source:MGI Symbol;Acc:MGI:1924155]	2.03507	1.02508	0.0354146
Pola2	polymerase (DNA directed), alpha 2 [Source:MGI Symbol;Acc:MGI:99690]	2.01909	1.01371	1.29073e-06
Pigt	phosphatidylinositol glycan anchor biosynthesis, class T [Source:MGI Symbol;Acc:MGI:1926178]	2.01452	1.01043	0.00525302
Gab2	growth factor receptor bound protein 2-associated protein 2 [Source:MGI Symbol;Acc:MGI:1333854]	2.01064	1.00765	8.6383e-09
Chpf2	chondroitin polymerizing factor 2 [Source:MGI Symbol;Acc:MGI:1917522]	2.01051	1.00756	4.54451e-06
Mfhas1	malignant fibrous histiocytoma amplified sequence 1 [Source:MGI Symbol;Acc:MGI:1098644]	2.00001	1	0.00605915
Pcdh11x	protocadherin 11 X-linked [Source:MGI Symbol;Acc:MGI:2442849]	0.499804	-1.00057	0.00379232
Rab2b	RAB2B, member RAS oncogene family [Source:MGI Symbol;Acc:MGI:1923588]	0.499098	-1.00261	5.48009e-10
Zfp977	zinc finger protein 977 [Source:MGI Symbol;Acc:MGI:3645327]	0.49896	-1.00301	0.0216044
Zfp788	zinc finger protein 788 [Source:MGI Symbol;Acc:MGI:1914857]	0.498779	-1.00353	1.51862e-10
Kcnq1ot1	KCNQ1 overlapping transcript 1 [Source:MGI Symbol;Acc:MGI:1926855]	0.497909	-1.00604	0.000401666
Borcs5	BLOC-1 related complex subunit 5 [Source:MGI Symbol;Acc:MGI:1915024]	0.497465	-1.00733	1.14659e-05
Adrb2	adrenergic receptor, beta 2 [Source:MGI Symbol;Acc:MGI:87938]	0.496275	-1.01079	2.68505e-09
Nr4a1	nuclear receptor subfamily 4, group A, member 1 [Source:MGI Symbol;Acc:MGI:1352454]	0.495856	-1.01201	0.00333637
Bcl7a	B cell CLL/lymphoma 7A [Source:MGI Symbol;Acc:MGI:1924295]	0.493615	-1.01854	0.000709466
BC051226	cDNA sequence BC051226 [Source:MGI Symbol;Acc:MGI:3039585]	0.493561	-1.0187	0.000973154
Zmym6	zinc finger, MYM-type 6 [Source:MGI Symbol;Acc:MGI:106505]	0.492796	-1.02094	4.16884e-09
Sipa1l2	signal-induced proliferation-associated 1 like 2 [Source:MGI Symbol;Acc:MGI:2676970]	0.492199	-1.02269	0.0117652
Spaca6	sperm acrosome associated 6 [Source:MGI Symbol;Acc:MGI:1922452]	0.49213	-1.02289	0.000422588
Gm43481	predicted gene 43481 [Source:MGI Symbol;Acc:MGI:5663618]	0.490353	-1.02811	0.0215878
Gm43059	predicted gene 43059 [Source:MGI Symbol;Acc:MGI:5663196]	0.489128	-1.03172	0.0348858
mt-Rnr2	mitochondrially encoded 16S rRNA [Source:MGI Symbol;Acc:MGI:102492]	0.487383	-1.03687	2.16465e-06
Mpv17l	Mpv17 transgene, kidney disease mutant-like [Source:MGI Symbol;Acc:MGI:2135951]	0.486166	-1.04048	1.42378e-06
Enpp4	ectonucleotide pyrophosphatase/phosphodiesterase 4 [Source:MGI Symbol;Acc:MGI:2682634]	0.48488	-1.0443	8.5777e-13
Gm37968	predicted gene, 37968 [Source:MGI Symbol;Acc:MGI:5611196]	0.483265	-1.04911	0.01641
Grk4	G protein-coupled receptor kinase 4 [Source:MGI Symbol;Acc:MGI:95801]	0.482995	-1.04992	0.00153513
Eml6	echinoderm microtubule associated protein like 6 [Source:MGI Symbol;Acc:MGI:2442895]	0.482626	-1.05102	3.73119e-06
Phf1	PHD finger protein 1 [Source:MGI Symbol;Acc:MGI:98647]	0.482625	-1.05103	0.0126996
Ogt	O-linked N-acetylglucosamine (GlcNAc) transferase (UDP-N-acetylglucosamine:polypeptide-N-acetylglucosaminyl transferase) [Source:MGI Symbol;Acc:MGI:1339639]	0.482475	-1.05147	1.6566e-09
2810013P06Rik	RIKEN cDNA 2810013P06 gene [Source:MGI Symbol;Acc:MGI:1914456]	0.482122	-1.05253	7.19097e-11
Gm32031	predicted gene, 32031 [Source:MGI Symbol;Acc:MGI:5591190]	0.481819	-1.05344	0.00843434
Clk1	CDC-like kinase 1 [Source:MGI Symbol;Acc:MGI:107403]	0.481502	-1.05439	3.29906e-10
Zfp420	zinc finger protein 420 [Source:MGI Symbol;Acc:MGI:2444666]	0.480875	-1.05627	1.53806e-06
Zfp950	zinc finger protein 950 [Source:MGI Symbol;Acc:MGI:2652824]	0.480191	-1.05832	1.16608e-09
Gm17024	predicted gene 17024 [Source:MGI Symbol;Acc:MGI:4937851]	0.479862	-1.05931	0.0140585
Irs1	insulin receptor substrate 1 [Source:MGI Symbol;Acc:MGI:99454]	0.478342	-1.06388	1.01078e-05
Gm38057	predicted gene, 38057 [Source:MGI Symbol;Acc:MGI:5611285]	0.478323	-1.06394	0.0163831
Tmem170	transmembrane protein 170 [Source:MGI Symbol;Acc:MGI:106426]	0.476726	-1.06877	1.74855e-09
Slc10a6	solute carrier family 10 (sodium/bile acid cotransporter family), member 6 [Source:MGI Symbol;Acc:MGI:1923000]	0.47528	-1.07315	0.00724191
Tmem116	transmembrane protein 116 [Source:MGI Symbol;Acc:MGI:1924712]	0.47371	-1.07792	0.0364058
4632427E13Rik	RIKEN cDNA 4632427E13 gene [Source:MGI Symbol;Acc:MGI:1915436]	0.47365	-1.07811	8.93475e-06
Gm25082	predicted gene, 25082 [Source:MGI Symbol;Acc:MGI:5454859]	0.47364	-1.07814	0.0271602
C730034F03Rik	RIKEN cDNA C730034F03 gene [Source:MGI Symbol;Acc:MGI:2441921]	0.47311	-1.07975	0.00841193
Gm43379	predicted gene 43379 [Source:MGI Symbol;Acc:MGI:5663516]	0.472099	-1.08284	0.000388018
Gm43437	predicted gene 43437 [Source:MGI Symbol;Acc:MGI:5663574]	0.471365	-1.08508	0.00725391
Gm43597	predicted gene 43597 [Source:MGI Symbol;Acc:MGI:5663734]	0.471021	-1.08614	8.83409e-05
Qk	quaking [Source:MGI Symbol;Acc:MGI:97837]	0.470329	-1.08826	0.000227396
1810026B05Rik	RIKEN cDNA 1810026B05 gene [Source:MGI Symbol;Acc:MGI:1916420]	0.469881	-1.08963	1.58805e-10
Per2	period circadian clock 2 [Source:MGI Symbol;Acc:MGI:1195265]	0.469858	-1.0897	0.0214034
Mfsd7a	major facilitator superfamily domain containing 7A [Source:MGI Symbol;Acc:MGI:2442629]	0.469377	-1.09118	1.58078e-06
Pnisr	PNN interacting serine/arginine-rich [Source:MGI Symbol;Acc:MGI:1913875]	0.467651	-1.0965	4.48111e-09
Gm37309	predicted gene, 37309 [Source:MGI Symbol;Acc:MGI:5610537]	0.465173	-1.10416	0.000579508
6430573P05Rik	RIKEN cDNA 6430573P05 gene [Source:MGI Symbol;Acc:MGI:2686494]	0.465071	-1.10448	0.0285498
Dtd1	D-tyrosyl-tRNA deacylase 1 [Source:MGI Symbol;Acc:MGI:1913294]	0.464788	-1.10536	4.00666e-10
Tmem117	transmembrane protein 117 [Source:MGI Symbol;Acc:MGI:2444580]	0.464329	-1.10678	0.00129037
Morn1	MORN repeat containing 1 [Source:MGI Symbol;Acc:MGI:1924116]	0.463634	-1.10894	8.90093e-05
6720427I07Rik	RIKEN cDNA 6720427I07 gene [Source:MGI Symbol;Acc:MGI:1924398]	0.461549	-1.11544	1.55491e-07
Npr2	natriuretic peptide receptor 2 [Source:MGI Symbol;Acc:MGI:97372]	0.455592	-1.13418	0.00872027
Gm38020	predicted gene, 38020 [Source:MGI Symbol;Acc:MGI:5611248]	0.455083	-1.1358	0.00266155
Epb41l2	erythrocyte membrane protein band 4.1 like 2 [Source:MGI Symbol;Acc:MGI:103009]	0.454413	-1.13792	1.20523e-15
Gm36298	predicted gene, 36298 [Source:MGI Symbol;Acc:MGI:5595457]	0.453779	-1.13994	0.000115713
Gm45501	predicted gene 45501 [Source:MGI Symbol;Acc:MGI:5791337]	0.453267	-1.14157	0.00114159
Ppm1l	protein phosphatase 1 (formerly 2C)-like [Source:MGI Symbol;Acc:MGI:2139740]	0.453259	-1.14159	0.00136164
Sp4	trans-acting transcription factor 4 [Source:MGI Symbol;Acc:MGI:107595]	0.451018	-1.14874	1.17399e-11
1700012D14Rik	RIKEN cDNA 1700012D14 gene [Source:MGI Symbol;Acc:MGI:1922729]	0.450606	-1.15006	0.00417896
Gm15265	predicted gene 15265 [Source:MGI Symbol;Acc:MGI:3705193]	0.448185	-1.15783	0.00651764
Kcnh8	potassium voltage-gated channel, subfamily H (eag-related), member 8 [Source:MGI Symbol;Acc:MGI:2445160]	0.446535	-1.16315	0.0438698
Gm15506	predicted gene 15506 [Source:MGI Symbol;Acc:MGI:3782954]	0.445651	-1.16601	0.0142157
Gm20597	predicted gene, 20597 [Source:MGI Symbol;Acc:MGI:5295703]	0.445315	-1.1671	0.000186141
Ino80dos	INO80 complex subunit D, opposite strand [Source:MGI Symbol;Acc:MGI:3651861]	0.443622	-1.1726	3.55924e-05
Chst1	carbohydrate sulfotransferase 1 [Source:MGI Symbol;Acc:MGI:1924219]	0.439358	-1.18653	0.000992519
Zfp945	zinc finger protein 945 [Source:MGI Symbol;Acc:MGI:2445132]	0.438632	-1.18892	4.68758e-10
P3h2	prolyl 3-hydroxylase 2 [Source:MGI Symbol;Acc:MGI:2146663]	0.438045	-1.19085	0.00652221
Plxna3	plexin A3 [Source:MGI Symbol;Acc:MGI:107683]	0.437989	-1.19103	0.00151724
Tcea2	transcription elongation factor A (SII), 2 [Source:MGI Symbol;Acc:MGI:107368]	0.437495	-1.19266	2.39055e-06
Gm45769	predicted gene 45769 [Source:MGI Symbol;Acc:MGI:5804884]	0.437227	-1.19355	0.000141155
Nfia	nuclear factor I/A [Source:MGI Symbol;Acc:MGI:108056]	0.435495	-1.19927	3.99145e-08
Igip	IgA inducing protein [Source:MGI Symbol;Acc:MGI:1924271]	0.434939	-1.20111	9.48227e-07
A430035B10Rik	RIKEN cDNA A430035B10 gene [Source:MGI Symbol;Acc:MGI:2443789]	0.432356	-1.20971	0.00129889
Plekha7	pleckstrin homology domain containing, family A member 7 [Source:MGI Symbol;Acc:MGI:2445094]	0.432345	-1.20975	0.000959219
Gm13403	predicted gene 13403 [Source:MGI Symbol;Acc:MGI:3649380]	0.431395	-1.21292	0.00751102
Csmd1	CUB and Sushi multiple domains 1 [Source:MGI Symbol;Acc:MGI:2137383]	0.429684	-1.21865	0.00156886
Sim2	single-minded family bHLH transcription factor 2 [Source:MGI Symbol;Acc:MGI:98307]	0.428699	-1.22196	0.0277026
Prkcg	protein kinase C, gamma [Source:MGI Symbol;Acc:MGI:97597]	0.428656	-1.22211	0.00241871
2810410L24Rik	RIKEN cDNA 2810410L24 gene [Source:MGI Symbol;Acc:MGI:1923627]	0.42729	-1.22671	0.00246201
Klhl3	kelch-like 3 [Source:MGI Symbol;Acc:MGI:2445185]	0.426266	-1.23017	0.000907636
2510017J16Rik	RIKEN cDNA 2510017J16 gene [Source:MGI Symbol;Acc:MGI:1913824]	0.424941	-1.23466	0.0498639
1300014J16Rik	RIKEN cDNA 1300014J16 gene [Source:MGI Symbol;Acc:MGI:1921410]	0.422416	-1.24326	0.0108524
Gm42878	predicted gene 42878 [Source:MGI Symbol;Acc:MGI:5663015]	0.4224	-1.24332	0.0498639
Inka2	inka box actin regulator 2 [Source:MGI Symbol;Acc:MGI:1923497]	0.421824	-1.24529	2.37642e-06
D430040D24Rik	RIKEN cDNA D430040D24 gene [Source:MGI Symbol;Acc:MGI:2442526]	0.421654	-1.24587	0.0156223
Tesk2	testis-specific kinase 2 [Source:MGI Symbol;Acc:MGI:2385204]	0.420075	-1.25128	0.000138036
Gk5	glycerol kinase 5 (putative) [Source:MGI Symbol;Acc:MGI:2443336]	0.418613	-1.25631	4.53539e-13
Sh2d4b	SH2 domain containing 4B [Source:MGI Symbol;Acc:MGI:1925182]	0.418397	-1.25706	0.00832285
Gm28151	predicted gene 28151 [Source:MGI Symbol;Acc:MGI:5578857]	0.417974	-1.25851	0.00150127
Prox2os	prospero homeobox 2 opposite strand [Source:MGI Symbol;Acc:MGI:5011542]	0.414572	-1.2703	0.0131146
Trim7	tripartite motif-containing 7 [Source:MGI Symbol;Acc:MGI:2137353]	0.413927	-1.27255	0.000956194
E230016M11Rik	RIKEN cDNA E230016M11 gene [Source:MGI Symbol;Acc:MGI:2443524]	0.413289	-1.27478	0.00360234
Slc12a5	solute carrier family 12, member 5 [Source:MGI Symbol;Acc:MGI:1862037]	0.413198	-1.27509	0.0049936
Gm43858	predicted gene 43858 [Source:MGI Symbol;Acc:MGI:5663995]	0.412802	-1.27648	9.46825e-05
NA	NA	0.411861	-1.27977	0.00643017
Gm36936	predicted gene, 36936 [Source:MGI Symbol;Acc:MGI:5610164]	0.409853	-1.28682	9.72577e-06
Gm38375	predicted gene, 38375 [Source:MGI Symbol;Acc:MGI:5611603]	0.408102	-1.293	0.00504093
Gm26944	predicted gene, 26944 [Source:MGI Symbol;Acc:MGI:5504059]	0.407536	-1.295	0.0014186
NA	NA	0.407393	-1.29551	1.78245e-06
Spata1	spermatogenesis associated 1 [Source:MGI Symbol;Acc:MGI:1918201]	0.406511	-1.29863	2.27328e-06
Prex2	phosphatidylinositol-3,4,5-trisphosphate-dependent Rac exchange factor 2 [Source:MGI Symbol;Acc:MGI:1923385]	0.406503	-1.29866	1.5844e-14
Jpx	Jpx transcript, Xist activator (non-protein coding) [Source:MGI Symbol;Acc:MGI:2180008]	0.406061	-1.30023	1.51123e-06
Cyp7b1	cytochrome P450, family 7, subfamily b, polypeptide 1 [Source:MGI Symbol;Acc:MGI:104978]	0.403889	-1.30797	2.53768e-09
4833412K13Rik	RIKEN cDNA 4833412K13 gene [Source:MGI Symbol;Acc:MGI:1921857]	0.401669	-1.31592	0.00832455
Etnk2	ethanolamine kinase 2 [Source:MGI Symbol;Acc:MGI:2443760]	0.4009	-1.31869	0.00578157
Gm37303	predicted gene, 37303 [Source:MGI Symbol;Acc:MGI:5610531]	0.399913	-1.32224	0.00319304
Slc35f1	solute carrier family 35, member F1 [Source:MGI Symbol;Acc:MGI:2139810]	0.399818	-1.32258	0.00054353
Tmod2	tropomodulin 2 [Source:MGI Symbol;Acc:MGI:1355335]	0.398036	-1.32903	1.36255e-07
Gm42742	predicted gene 42742 [Source:MGI Symbol;Acc:MGI:5662879]	0.397859	-1.32967	0.0353728
C230062I16Rik	RIKEN cDNA C230062I16 gene [Source:MGI Symbol;Acc:MGI:2442417]	0.39765	-1.33043	0.00567324
Purg	purine-rich element binding protein G [Source:MGI Symbol;Acc:MGI:1922279]	0.396264	-1.33547	6.83665e-07

## Sheet: E
(E) The 1581 genes differentially expressed between 10 week cut and 1 week cut nerves from WT mice (WT cut 10 week vs 1 week)
Gene		Fold Change	log Fold Change	Adjusted p Value
Ighg2b	immunoglobulin heavy constant gamma 2B [Source:MGI Symbol;Acc:MGI:96445]	9720.8	13.2469	0.000345005
Ighv1-22	immunoglobulin heavy variable 1-22 [Source:MGI Symbol;Acc:MGI:4439784]	953.76	9.89748	0.0015601
Crybg2	crystallin beta-gamma domain containing 2 [Source:MGI Symbol;Acc:MGI:1334463]	841.492	9.71681	0.00032853
Myh4	myosin, heavy polypeptide 4, skeletal muscle [Source:MGI Symbol;Acc:MGI:1339713]	688.911	9.42817	0.0187325
Igkv6-15	immunoglobulin kappa variable 6-15 [Source:MGI Symbol;Acc:MGI:1330831]	439.079	8.77834	0.00382025
Igkv8-24	immunoglobulin kappa chain variable 8-24 [Source:MGI Symbol;Acc:MGI:4947958]	368.46	8.52536	0.0466294
Ighv1-75	immunoglobulin heavy variable 1-75 [Source:MGI Symbol;Acc:MGI:4439735]	310.542	8.27865	0.00306238
Atp2a1	ATPase, Ca++ transporting, cardiac muscle, fast twitch 1 [Source:MGI Symbol;Acc:MGI:105058]	290.35	8.18165	0.0198366
Igha	immunoglobulin heavy constant alpha [Source:MGI Symbol;Acc:MGI:96444]	213.518	7.73821	0.00622009
Xirp2	xin actin-binding repeat containing 2 [Source:MGI Symbol;Acc:MGI:2685198]	209.862	7.7133	0.0355989
Iglc2	immunoglobulin lambda constant 2 [Source:MGI Symbol;Acc:MGI:99547]	198.421	7.63242	1.1697e-05
Igkv12-98	immunoglobulin kappa variable 12-98 [Source:MGI Symbol;Acc:MGI:4439560]	188.5	7.55842	8.93078e-05
Prr32	proline rich 32 [Source:MGI Symbol;Acc:MGI:1916050]	188.456	7.55809	7.44861e-06
Igkv6-17	immunoglobulin kappa variable 6-17 [Source:MGI Symbol;Acc:MGI:1330833]	184.923	7.53078	0.0372029
Cpne4	copine IV [Source:MGI Symbol;Acc:MGI:1921270]	181.455	7.50347	0.000220707
Pvalb	parvalbumin [Source:MGI Symbol;Acc:MGI:97821]	148.499	7.21431	0.0327655
Mybpc2	myosin binding protein C, fast-type [Source:MGI Symbol;Acc:MGI:1336170]	140.729	7.13677	0.0482258
Cdh8	cadherin 8 [Source:MGI Symbol;Acc:MGI:107434]	121.553	6.92544	0.00906591
Slitrk3	SLIT and NTRK-like family, member 3 [Source:MGI Symbol;Acc:MGI:2679447]	104.462	6.70684	0.0357623
Gbp2b	guanylate binding protein 2b [Source:MGI Symbol;Acc:MGI:95666]	91.5093	6.51585	1.68441e-09
Gm45705	predicted gene 45705 [Source:MGI Symbol;Acc:MGI:5804820]	90.7117	6.50322	0.000560604
Ighg1	immunoglobulin heavy constant gamma 1 (G1m marker) [Source:MGI Symbol;Acc:MGI:96446]	89.2512	6.4798	0.000765529
Igkv19-93	immunoglobulin kappa chain variable 19-93 [Source:MGI Symbol;Acc:MGI:107617]	89.1216	6.4777	0.0374746
Gm28438	predicted gene 28438 [Source:MGI Symbol;Acc:MGI:5579144]	87.8196	6.45647	0.000361674
Slc15a5	solute carrier family 15, member 5 [Source:MGI Symbol;Acc:MGI:3607714]	83.6784	6.38678	0.00169816
Igkv14-111	immunoglobulin kappa variable 14-111 [Source:MGI Symbol;Acc:MGI:4439863]	82.929	6.37381	0.00116486
Zfp683	zinc finger protein 683 [Source:MGI Symbol;Acc:MGI:3650254]	69.8805	6.12682	0.00373377
Trdn	triadin [Source:MGI Symbol;Acc:MGI:1924007]	64.0064	6.00014	0.0245264
Lhfpl1	lipoma HMGIC fusion partner-like 1 [Source:MGI Symbol;Acc:MGI:1891214]	63.5886	5.9907	0.00149541
1700047G03Rik	RIKEN cDNA 1700047G03 gene [Source:MGI Symbol;Acc:MGI:1920589]	58.2146	5.86331	0.0108329
Acta1	actin, alpha 1, skeletal muscle [Source:MGI Symbol;Acc:MGI:87902]	54.235	5.76115	0.0361855
Slain1	SLAIN motif family, member 1 [Source:MGI Symbol;Acc:MGI:2145578]	53.4469	5.74004	0.00155392
Npy2r	neuropeptide Y receptor Y2 [Source:MGI Symbol;Acc:MGI:108418]	49.4633	5.62829	1.3271e-08
Cd3d	CD3 antigen, delta polypeptide [Source:MGI Symbol;Acc:MGI:88331]	40.0542	5.32388	0.0348961
Casr	calcium-sensing receptor [Source:MGI Symbol;Acc:MGI:1351351]	30.8343	4.94646	0.00308102
Klhl1	kelch-like 1 [Source:MGI Symbol;Acc:MGI:2136335]	30.4537	4.92855	1.98039e-07
Gm4841	predicted gene 4841 [Source:MGI Symbol;Acc:MGI:3643814]	29.889	4.90154	9.85313e-08
Themis	thymocyte selection associated [Source:MGI Symbol;Acc:MGI:2443552]	26.9902	4.75436	0.0143576
Olig2	oligodendrocyte transcription factor 2 [Source:MGI Symbol;Acc:MGI:1355331]	26.9704	4.75331	2.75428e-05
Gm48617	predicted gene, 48617 [Source:MGI Symbol;Acc:MGI:6098210]	26.086	4.7052	0.0126932
Gm33091	predicted gene, 33091 [Source:MGI Symbol;Acc:MGI:5592250]	25.7608	4.68711	1.13436e-05
Plppr4	phospholipid phosphatase related 4 [Source:MGI Symbol;Acc:MGI:106530]	25.0648	4.64759	1.73542e-05
Hectd2os	Hectd2, opposite strand [Source:MGI Symbol;Acc:MGI:1919243]	24.9543	4.64122	0.0206952
Iglc1	immunoglobulin lambda constant 1 [Source:MGI Symbol;Acc:MGI:99546]	23.9004	4.57896	0.0451704
Sertm1	serine rich and transmembrane domain containing 1 [Source:MGI Symbol;Acc:MGI:3607715]	23.2216	4.5374	0.0128653
Mzb1	marginal zone B and B1 cell-specific protein 1 [Source:MGI Symbol;Acc:MGI:1917066]	22.9533	4.52063	0.0399806
Unc5d	unc-5 netrin receptor D [Source:MGI Symbol;Acc:MGI:2389364]	22.9392	4.51974	1.15555e-06
Gabrb1	gamma-aminobutyric acid (GABA) A receptor, subunit beta 1 [Source:MGI Symbol;Acc:MGI:95619]	22.671	4.50278	0.0334069
Apol9b	apolipoprotein L 9b [Source:MGI Symbol;Acc:MGI:1919148]	22.1256	4.46764	4.98282e-06
Xcl1	chemokine (C motif) ligand 1 [Source:MGI Symbol;Acc:MGI:104593]	21.5715	4.43105	0.0171671
Cxcl9	chemokine (C-X-C motif) ligand 9 [Source:MGI Symbol;Acc:MGI:1352449]	21.3525	4.41633	0.000169733
Cd3e	CD3 antigen, epsilon polypeptide [Source:MGI Symbol;Acc:MGI:88332]	19.6036	4.29305	0.0181547
Hspd1-ps4	heat shock protein 1 (chaperonin), pseudogene 4 [Source:MGI Symbol;Acc:MGI:3649750]	19.1055	4.25591	1.9984e-05
Gimap7	GTPase, IMAP family member 7 [Source:MGI Symbol;Acc:MGI:1349657]	18.5615	4.21424	0.0186911
Sec14l4	SEC14-like lipid binding 4 [Source:MGI Symbol;Acc:MGI:2144095]	18.5527	4.21356	0.00312451
Trbc2	T cell receptor beta, constant 2 [Source:MGI Symbol;Acc:MGI:4835227]	16.9522	4.0834	0.0106476
Mybph	myosin binding protein H [Source:MGI Symbol;Acc:MGI:1858196]	16.7553	4.06654	2.21447e-06
Trank1	tetratricopeptide repeat and ankyrin repeat containing 1 [Source:MGI Symbol;Acc:MGI:1341834]	16.5866	4.05195	8.98048e-08
Adamdec1	ADAM-like, decysin 1 [Source:MGI Symbol;Acc:MGI:1917650]	16.1194	4.01073	0.000130217
Cd3g	CD3 antigen, gamma polypeptide [Source:MGI Symbol;Acc:MGI:88333]	16.0041	4.00037	0.0233429
Cxcr6	chemokine (C-X-C motif) receptor 6 [Source:MGI Symbol;Acc:MGI:1934582]	15.5017	3.95436	0.00257133
Sla2	Src-like-adaptor 2 [Source:MGI Symbol;Acc:MGI:1925049]	15.4526	3.94978	0.0151931
Topaz1	testis and ovary specific PAZ domain containing 1 [Source:MGI Symbol;Acc:MGI:3779933]	14.6098	3.86887	0.00199712
Tbx21	T-box 21 [Source:MGI Symbol;Acc:MGI:1888984]	14.3538	3.84336	0.00074515
Lancl3	LanC lantibiotic synthetase component C-like 3 (bacterial) [Source:MGI Symbol;Acc:MGI:2443335]	14.2859	3.83652	0.00629107
Ubd	ubiquitin D [Source:MGI Symbol;Acc:MGI:1344410]	14.1228	3.81995	0.00429165
Snord17	small nucleolar RNA, C/D box 17 [Source:MGI Symbol;Acc:MGI:3819523]	14.0199	3.8094	0.00291692
Myo3a	myosin IIIA [Source:MGI Symbol;Acc:MGI:2183924]	13.6939	3.77546	8.35442e-11
Tnn	tenascin N [Source:MGI Symbol;Acc:MGI:2665790]	13.6866	3.7747	1.01136e-11
Tgtp2	T cell specific GTPase 2 [Source:MGI Symbol;Acc:MGI:3710083]	13.5997	3.76551	1.76914e-16
Nrxn1	neurexin I [Source:MGI Symbol;Acc:MGI:1096391]	13.4644	3.75108	1.72452e-08
Gm28802	predicted gene 28802 [Source:MGI Symbol;Acc:MGI:5579508]	13.327	3.73628	0.0494615
Ifi208	interferon activated gene 208 [Source:MGI Symbol;Acc:MGI:2442822]	12.8455	3.68319	0.0118365
Slitrk1	SLIT and NTRK-like family, member 1 [Source:MGI Symbol;Acc:MGI:2679446]	12.4785	3.64137	6.80787e-11
Tcrg-C4	T cell receptor gamma, constant 4 [Source:MGI Symbol;Acc:MGI:98628]	12.0819	3.59477	0.0223748
Tacr3	tachykinin receptor 3 [Source:MGI Symbol;Acc:MGI:892968]	11.8314	3.56455	0.0300177
Igkv8-21	immunoglobulin kappa variable 8-21 [Source:MGI Symbol;Acc:MGI:1330840]	11.8073	3.56161	0.0365655
Dnah9	dynein, axonemal, heavy chain 9 [Source:MGI Symbol;Acc:MGI:1289279]	11.7946	3.56005	0.00197287
Pirt	phosphoinositide-interacting regulator of transient receptor potential channels [Source:MGI Symbol;Acc:MGI:2443635]	11.6777	3.54568	6.12986e-07
Serpina3g	serine (or cysteine) peptidase inhibitor, clade A, member 3G [Source:MGI Symbol;Acc:MGI:105046]	11.0936	3.47165	0.0449726
Ncan	neurocan [Source:MGI Symbol;Acc:MGI:104694]	11.0575	3.46695	0.00508023
Gimap3	GTPase, IMAP family member 3 [Source:MGI Symbol;Acc:MGI:1932723]	10.9624	3.45449	0.0361569
Krtap1-5	keratin associated protein 1-5 [Source:MGI Symbol;Acc:MGI:1916914]	10.944	3.45207	0.0430652
Sv2c	synaptic vesicle glycoprotein 2c [Source:MGI Symbol;Acc:MGI:1922459]	10.84	3.43829	3.33841e-05
Ly6c2	lymphocyte antigen 6 complex, locus C2 [Source:MGI Symbol;Acc:MGI:3712069]	10.7021	3.41982	0.0107263
Fam196b	family with sequence similarity 196, member B [Source:MGI Symbol;Acc:MGI:3643491]	10.1628	3.34523	0.0015371
Gm5148	predicted gene 5148 [Source:MGI Symbol;Acc:MGI:3646006]	10.0147	3.32404	0.00316493
Cct6b	chaperonin containing Tcp1, subunit 6b (zeta) [Source:MGI Symbol;Acc:MGI:1329013]	9.85487	3.30084	0.0142984
Gm26703	predicted gene, 26703 [Source:MGI Symbol;Acc:MGI:5477197]	9.80188	3.29306	0.00251897
Tgtp1	T cell specific GTPase 1 [Source:MGI Symbol;Acc:MGI:98734]	9.73657	3.28341	4.34898e-06
Fasl	Fas ligand (TNF superfamily, member 6) [Source:MGI Symbol;Acc:MGI:99255]	9.45987	3.24182	0.027973
Ecel1	endothelin converting enzyme-like 1 [Source:MGI Symbol;Acc:MGI:1343461]	9.36056	3.22659	0.000379625
Tpsg1	tryptase gamma 1 [Source:MGI Symbol;Acc:MGI:1349391]	9.21733	3.20435	0.000616013
Ly6g5b	lymphocyte antigen 6 complex, locus G5B [Source:MGI Symbol;Acc:MGI:2385809]	9.12281	3.18948	0.0319567
Gys2	glycogen synthase 2 [Source:MGI Symbol;Acc:MGI:2385254]	9.11663	3.1885	0.0129916
Csmd2	CUB and Sushi multiple domains 2 [Source:MGI Symbol;Acc:MGI:2386401]	9.03408	3.17538	0.0126771
Fgf13	fibroblast growth factor 13 [Source:MGI Symbol;Acc:MGI:109178]	9.02264	3.17355	4.89074e-06
H2-Q6	histocompatibility 2, Q region locus 6 [Source:MGI Symbol;Acc:MGI:95935]	9.02066	3.17323	3.80319e-06
Duox2	dual oxidase 2 [Source:MGI Symbol;Acc:MGI:3036280]	8.99099	3.16848	0.00133829
Gm37186	predicted gene, 37186 [Source:MGI Symbol;Acc:MGI:5610414]	8.89004	3.15219	0.0329355
Tshr	thyroid stimulating hormone receptor [Source:MGI Symbol;Acc:MGI:98849]	8.88838	3.15192	0.00497466
Ccdc192	coiled-coil domain containing 192 [Source:MGI Symbol;Acc:MGI:1922694]	8.8856	3.15147	0.00315194
Klk1	kallikrein 1 [Source:MGI Symbol;Acc:MGI:102850]	8.84243	3.14444	0.000461359
Gad2	glutamic acid decarboxylase 2 [Source:MGI Symbol;Acc:MGI:95634]	8.79702	3.13701	1.0434e-12
BC035947	cDNA sequence BC035947 [Source:MGI Symbol;Acc:MGI:2652858]	8.72793	3.12564	0.00159694
Il18r1	interleukin 18 receptor 1 [Source:MGI Symbol;Acc:MGI:105383]	8.69308	3.11987	0.0225589
Cdsn	corneodesmosin [Source:MGI Symbol;Acc:MGI:3505689]	8.55352	3.09652	0.00018593
Ly6k	lymphocyte antigen 6 complex, locus K [Source:MGI Symbol;Acc:MGI:1923736]	8.5259	3.09185	0.0306249
Alb	albumin [Source:MGI Symbol;Acc:MGI:87991]	8.44719	3.07847	0.00291692
Cd163l1	CD163 molecule-like 1 [Source:MGI Symbol;Acc:MGI:2443796]	8.39751	3.06996	0.0283913
Gpr156	G protein-coupled receptor 156 [Source:MGI Symbol;Acc:MGI:2653880]	8.31857	3.05634	0.000186744
H2-Q5	histocompatibility 2, Q region locus 5 [Source:MGI Symbol;Acc:MGI:95934]	8.17497	3.03121	0.000366414
Nos2	nitric oxide synthase 2, inducible [Source:MGI Symbol;Acc:MGI:97361]	8.0622	3.01117	0.0015927
Samd3	sterile alpha motif domain containing 3 [Source:MGI Symbol;Acc:MGI:2685469]	7.97644	2.99575	0.0108303
Oxtr	oxytocin receptor [Source:MGI Symbol;Acc:MGI:109147]	7.84833	2.97239	9.07959e-05
Trim67	tripartite motif-containing 67 [Source:MGI Symbol;Acc:MGI:3045323]	7.74443	2.95316	0.00090916
Gm5970	predicted gene 5970 [Source:MGI Symbol;Acc:MGI:3646761]	7.70993	2.94672	0.000543936
Igsf21	immunoglobulin superfamily, member 21 [Source:MGI Symbol;Acc:MGI:2681842]	7.69677	2.94425	0.00143591
Adra1b	adrenergic receptor, alpha 1b [Source:MGI Symbol;Acc:MGI:104774]	7.63347	2.93234	2.65788e-13
1700006J14Rik	RIKEN cDNA 1700006J14 gene [Source:MGI Symbol;Acc:MGI:2447818]	7.36424	2.88054	0.0213467
Hydin	HYDIN, axonemal central pair apparatus protein [Source:MGI Symbol;Acc:MGI:2389007]	7.30398	2.86868	0.00670412
Kcnj14	potassium inwardly-rectifying channel, subfamily J, member 14 [Source:MGI Symbol;Acc:MGI:2384820]	7.27662	2.86327	0.0133374
Gm7357	predicted gene 7357 [Source:MGI Symbol;Acc:MGI:3643257]	7.24781	2.85754	0.0426073
Gdf5	growth differentiation factor 5 [Source:MGI Symbol;Acc:MGI:95688]	7.16258	2.84048	0.0194158
Gm32688	predicted gene, 32688 [Source:MGI Symbol;Acc:MGI:5591847]	7.15225	2.8384	0.0087989
H2-Q7	histocompatibility 2, Q region locus 7 [Source:MGI Symbol;Acc:MGI:95936]	7.13144	2.83419	2.62854e-05
Hrk	harakiri, BCL2 interacting protein (contains only BH3 domain) [Source:MGI Symbol;Acc:MGI:1201608]	7.09578	2.82696	0.00288729
Gbp10	guanylate-binding protein 10 [Source:MGI Symbol;Acc:MGI:4359647]	7.06575	2.82084	0.00861464
Otop1	otopetrin 1 [Source:MGI Symbol;Acc:MGI:2388363]	7.04753	2.81712	0.00914006
2001-03-01	mitochondrial amidoxime reducing component 1 [Source:MGI Symbol;Acc:MGI:1913362]	7.01976	2.81142	0.000789872
9230112J17Rik	RIKEN cDNA 9230112J17 gene [Source:MGI Symbol;Acc:MGI:1924999]	7.00932	2.80928	0.0140268
Npr3	natriuretic peptide receptor 3 [Source:MGI Symbol;Acc:MGI:97373]	6.99148	2.8056	4.49754e-06
Gm12185	predicted gene 12185 [Source:MGI Symbol;Acc:MGI:3652173]	6.96653	2.80044	0.00067736
Rfx4	regulatory factor X, 4 (influences HLA class II expression) [Source:MGI Symbol;Acc:MGI:1918387]	6.93467	2.79383	3.59065e-06
Tmem45b	transmembrane protein 45b [Source:MGI Symbol;Acc:MGI:2384574]	6.91522	2.78977	0.00772028
Cacna2d3	calcium channel, voltage-dependent, alpha2/delta subunit 3 [Source:MGI Symbol;Acc:MGI:1338890]	6.91361	2.78944	0.0155835
Timp4	tissue inhibitor of metalloproteinase 4 [Source:MGI Symbol;Acc:MGI:109125]	6.90029	2.78666	0.047305
Gm43508	predicted gene 43508 [Source:MGI Symbol;Acc:MGI:5663645]	6.77755	2.76076	0.0174979
Klra7	killer cell lectin-like receptor, subfamily A, member 7 [Source:MGI Symbol;Acc:MGI:101901]	6.74705	2.75426	0.0178466
Slc25a21	solute carrier family 25 (mitochondrial oxodicarboxylate carrier), member 21 [Source:MGI Symbol;Acc:MGI:2445059]	6.74691	2.75423	0.00617801
Duoxa2	dual oxidase maturation factor 2 [Source:MGI Symbol;Acc:MGI:1914061]	6.74686	2.75422	0.00155392
Acaa1b	acetyl-Coenzyme A acyltransferase 1B [Source:MGI Symbol;Acc:MGI:3605455]	6.70143	2.74447	0.0129916
Npy4r	neuropeptide Y receptor Y4 [Source:MGI Symbol;Acc:MGI:105374]	6.70008	2.74418	0.0391088
Ybx2	Y box protein 2 [Source:MGI Symbol;Acc:MGI:1096372]	6.6802	2.73989	0.000227727
Entpd3	ectonucleoside triphosphate diphosphohydrolase 3 [Source:MGI Symbol;Acc:MGI:1321386]	6.56715	2.71527	0.0283196
Cysltr2	cysteinyl leukotriene receptor 2 [Source:MGI Symbol;Acc:MGI:1917336]	6.56666	2.71516	0.00167777
Hs3st3a1	heparan sulfate (glucosamine) 3-O-sulfotransferase 3A1 [Source:MGI Symbol;Acc:MGI:1333861]	6.46215	2.69201	0.00365549
Kcnj15	potassium inwardly-rectifying channel, subfamily J, member 15 [Source:MGI Symbol;Acc:MGI:1310000]	6.44895	2.68906	0.00266844
Gm5460	predicted gene 5460 [Source:MGI Symbol;Acc:MGI:3643519]	6.43778	2.68656	0.0172038
Ptchd4	patched domain containing 4 [Source:MGI Symbol;Acc:MGI:1920485]	6.41801	2.68212	0.0420509
Gm830	predicted gene 830 [Source:MGI Symbol;Acc:MGI:2685676]	6.41349	2.68111	0.00112241
Aqp7	aquaporin 7 [Source:MGI Symbol;Acc:MGI:1314647]	6.39721	2.67744	0.0230884
Apol9a	apolipoprotein L 9a [Source:MGI Symbol;Acc:MGI:3606001]	6.39696	2.67739	0.00759605
BC051142	cDNA sequence BC051142 [Source:MGI Symbol;Acc:MGI:3039565]	6.31161	2.65801	7.01451e-05
Cacna1e	calcium channel, voltage-dependent, R type, alpha 1E subunit [Source:MGI Symbol;Acc:MGI:106217]	6.26151	2.64651	0.0498799
Iigp1	interferon inducible GTPase 1 [Source:MGI Symbol;Acc:MGI:1926259]	6.25086	2.64406	3.83877e-08
Pkp1	plakophilin 1 [Source:MGI Symbol;Acc:MGI:1328359]	6.22122	2.6372	0.019125
Adora1	adenosine A1 receptor [Source:MGI Symbol;Acc:MGI:99401]	6.12388	2.61445	1.3423e-13
Aldh1a7	aldehyde dehydrogenase family 1, subfamily A7 [Source:MGI Symbol;Acc:MGI:1347050]	6.11291	2.61186	0.00734657
Lrrc39	leucine rich repeat containing 39 [Source:MGI Symbol;Acc:MGI:1924557]	6.01562	2.58871	0.000444923
Cntfr	ciliary neurotrophic factor receptor [Source:MGI Symbol;Acc:MGI:99605]	5.9828	2.58082	1.57656e-12
F830016B08Rik	RIKEN cDNA F830016B08 gene [Source:MGI Symbol;Acc:MGI:3588218]	5.97425	2.57876	3.22595e-09
Dlgap2	DLG associated protein 2 [Source:MGI Symbol;Acc:MGI:2443181]	5.96463	2.57643	1.23937e-06
Gm29684	predicted gene, 29684 [Source:MGI Symbol;Acc:MGI:5588843]	5.84172	2.54639	0.0139428
Cldn11	claudin 11 [Source:MGI Symbol;Acc:MGI:106925]	5.82052	2.54115	1.49766e-08
Gm43654	predicted gene 43654 [Source:MGI Symbol;Acc:MGI:5663791]	5.81103	2.53879	0.00371047
Adamtsl2	ADAMTS-like 2 [Source:MGI Symbol;Acc:MGI:1925044]	5.80413	2.53708	3.65384e-06
Gm10388	predicted gene 10388 [Source:MGI Symbol;Acc:MGI:3641777]	5.77906	2.53084	0.0268593
Gm38398	predicted gene, 38398 [Source:MGI Symbol;Acc:MGI:5618692]	5.77681	2.53027	0.0383482
Adgrb1	adhesion G protein-coupled receptor B1 [Source:MGI Symbol;Acc:MGI:1933736]	5.76684	2.52778	0.0232106
Mlana	melan-A [Source:MGI Symbol;Acc:MGI:108454]	5.75023	2.52362	0.0178306
Gm45114	predicted gene 45114 [Source:MGI Symbol;Acc:MGI:5753690]	5.73766	2.52046	0.0269484
B430010I23Rik	RIKEN cDNA B430010I23 gene [Source:MGI Symbol;Acc:MGI:1926099]	5.72071	2.51619	0.0024149
Cbs	cystathionine beta-synthase [Source:MGI Symbol;Acc:MGI:88285]	5.64497	2.49696	0.0243951
Folh1	folate hydrolase 1 [Source:MGI Symbol;Acc:MGI:1858193]	5.63049	2.49326	5.8455e-09
9130208D14Rik	RIKEN cDNA 9130208D14 gene [Source:MGI Symbol;Acc:MGI:1924950]	5.61978	2.49051	0.00350577
Egfem1	EGF-like and EMI domain containing 1 [Source:MGI Symbol;Acc:MGI:1922990]	5.59692	2.48463	0.00477821
Npbwr1	neuropeptides B/W receptor 1 [Source:MGI Symbol;Acc:MGI:891989]	5.55753	2.47444	0.000316142
D430013B06Rik	RIKEN cDNA D430013B06 gene [Source:MGI Symbol;Acc:MGI:3026994]	5.54432	2.47101	0.0326591
Sucnr1	succinate receptor 1 [Source:MGI Symbol;Acc:MGI:1934135]	5.49802	2.45891	4.35352e-05
Gm45187	predicted gene 45187 [Source:MGI Symbol;Acc:MGI:5753763]	5.48986	2.45677	0.00179877
Mogat1	monoacylglycerol O-acyltransferase 1 [Source:MGI Symbol;Acc:MGI:1915643]	5.48283	2.45492	0.00701287
Rims4	regulating synaptic membrane exocytosis 4 [Source:MGI Symbol;Acc:MGI:2674366]	5.46155	2.44931	0.00226417
Capn12	calpain 12 [Source:MGI Symbol;Acc:MGI:1891369]	5.42497	2.43961	0.0195472
Syt10	synaptotagmin X [Source:MGI Symbol;Acc:MGI:1859546]	5.39897	2.43268	0.000115178
Gm12250	predicted gene 12250 [Source:MGI Symbol;Acc:MGI:3649299]	5.3973	2.43224	0.00219828
Gm4951	predicted gene 4951 [Source:MGI Symbol;Acc:MGI:3644953]	5.39388	2.43132	3.83877e-08
Gbp6	guanylate binding protein 6 [Source:MGI Symbol;Acc:MGI:2140937]	5.37108	2.42521	5.24944e-06
2610016A17Rik	RIKEN cDNA 2610016A17 gene [Source:MGI Symbol;Acc:MGI:1919653]	5.35561	2.42105	0.0155851
Gm37314	predicted gene, 37314 [Source:MGI Symbol;Acc:MGI:5610542]	5.34071	2.41703	0.0482434
Nphs2	nephrosis 2, podocin [Source:MGI Symbol;Acc:MGI:2157018]	5.32419	2.41256	0.0137151
2810030D12Rik	RIKEN cDNA 2810030D12 gene [Source:MGI Symbol;Acc:MGI:1925585]	5.32014	2.41146	0.00189026
Als2cr12	amyotrophic lateral sclerosis 2 chromosome region 12 [Source:MGI Symbol;Acc:MGI:1918359]	5.28804	2.40273	0.00875928
B3gat2	beta-1,3-glucuronyltransferase 2 (glucuronosyltransferase S) [Source:MGI Symbol;Acc:MGI:2389490]	5.25268	2.39305	1.15603e-06
Gbp8	guanylate-binding protein 8 [Source:MGI Symbol;Acc:MGI:1923324]	5.25244	2.39299	0.0408858
Gm15408	predicted gene 15408 [Source:MGI Symbol;Acc:MGI:3705101]	5.23653	2.38861	0.00453165
Syt5	synaptotagmin V [Source:MGI Symbol;Acc:MGI:1926368]	5.21038	2.38139	0.0426519
Frmpd2	FERM and PDZ domain containing 2 [Source:MGI Symbol;Acc:MGI:2685472]	5.19698	2.37767	0.0451998
Tenm4	teneurin transmembrane protein 4 [Source:MGI Symbol;Acc:MGI:2447063]	5.19232	2.37638	0.00101171
Cldn22	claudin 22 [Source:MGI Symbol;Acc:MGI:1922927]	5.19213	2.37633	0.000108731
Kcnk3	potassium channel, subfamily K, member 3 [Source:MGI Symbol;Acc:MGI:1100509]	5.17938	2.37278	0.000258128
Slc6a20a	solute carrier family 6 (neurotransmitter transporter), member 20A [Source:MGI Symbol;Acc:MGI:2143217]	5.17799	2.37239	3.39759e-05
Mgst2	microsomal glutathione S-transferase 2 [Source:MGI Symbol;Acc:MGI:2448481]	5.17612	2.37187	1.61287e-05
Wnt16	wingless-type MMTV integration site family, member 16 [Source:MGI Symbol;Acc:MGI:2136018]	5.17039	2.37027	0.00627178
Nr1d1	nuclear receptor subfamily 1, group D, member 1 [Source:MGI Symbol;Acc:MGI:2444210]	5.14724	2.3638	1.16287e-07
Akr1c19	aldo-keto reductase family 1, member C19 [Source:MGI Symbol;Acc:MGI:2653678]	5.14215	2.36237	0.00959406
Scnn1b	sodium channel, nonvoltage-gated 1 beta [Source:MGI Symbol;Acc:MGI:104696]	5.12957	2.35884	0.00532161
Gbp4	guanylate binding protein 4 [Source:MGI Symbol;Acc:MGI:97072]	5.12765	2.3583	4.1717e-10
Gm43999	predicted gene, 43999 [Source:MGI Symbol;Acc:MGI:5690391]	5.12225	2.35678	0.0444896
Baiap3	BAI1-associated protein 3 [Source:MGI Symbol;Acc:MGI:2685783]	5.1089	2.35301	0.0478305
B230303O12Rik	RIKEN cDNA B230303O12 gene [Source:MGI Symbol;Acc:MGI:2442644]	5.08406	2.34598	0.0124272
Depp1	DEPP1 autophagy regulator [Source:MGI Symbol;Acc:MGI:1918730]	5.07145	2.3424	0.000375964
Ffar4	free fatty acid receptor 4 [Source:MGI Symbol;Acc:MGI:2147577]	5.06294	2.33998	0.00256233
Myom3	myomesin family, member 3 [Source:MGI Symbol;Acc:MGI:2685280]	5.04707	2.33545	0.001138
Nrg2	neuregulin 2 [Source:MGI Symbol;Acc:MGI:1098246]	5.04352	2.33443	0.0490358
Tnk1	tyrosine kinase, non-receptor, 1 [Source:MGI Symbol;Acc:MGI:1930958]	5.04165	2.3339	0.00308102
Jakmip3	janus kinase and microtubule interacting protein 3 [Source:MGI Symbol;Acc:MGI:1921254]	5.01752	2.32697	0.00553136
Extl1	exostoses (multiple)-like 1 [Source:MGI Symbol;Acc:MGI:1888742]	5.0034	2.32291	0.000824425
Cst7	cystatin F (leukocystatin) [Source:MGI Symbol;Acc:MGI:1298217]	4.99616	2.32082	0.0251298
Gabbr2	gamma-aminobutyric acid (GABA) B receptor, 2 [Source:MGI Symbol;Acc:MGI:2386030]	4.98207	2.31674	0.017805
Pitpnm3	PITPNM family member 3 [Source:MGI Symbol;Acc:MGI:2685726]	4.97331	2.31421	1.01295e-05
Olfm2	olfactomedin 2 [Source:MGI Symbol;Acc:MGI:3045350]	4.96491	2.31177	0.0236879
Gm17597	predicted gene, 17597 [Source:MGI Symbol;Acc:MGI:4937231]	4.89297	2.29071	0.0356672
Apol10b	apolipoprotein L 10B [Source:MGI Symbol;Acc:MGI:3043522]	4.83184	2.27257	9.88342e-06
Rgs7	regulator of G protein signaling 7 [Source:MGI Symbol;Acc:MGI:1346089]	4.83141	2.27244	0.0119502
Nfe2l3	nuclear factor, erythroid derived 2, like 3 [Source:MGI Symbol;Acc:MGI:1339958]	4.82741	2.27125	0.0129704
Btnl9	butyrophilin-like 9 [Source:MGI Symbol;Acc:MGI:2442439]	4.81525	2.26761	0.0380641
Itpka	inositol 1,4,5-trisphosphate 3-kinase A [Source:MGI Symbol;Acc:MGI:1333822]	4.81236	2.26674	0.0263161
Gpihbp1	GPI-anchored HDL-binding protein 1 [Source:MGI Symbol;Acc:MGI:1915703]	4.78802	2.25943	0.00266844
Irs3	insulin receptor substrate 3 [Source:MGI Symbol;Acc:MGI:1194882]	4.72541	2.24044	0.00450592
Gpr20	G protein-coupled receptor 20 [Source:MGI Symbol;Acc:MGI:2441803]	4.72296	2.23969	0.00393839
Gm30075	predicted gene, 30075 [Source:MGI Symbol;Acc:MGI:5589234]	4.72145	2.23923	0.000583406
Vgf	VGF nerve growth factor inducible [Source:MGI Symbol;Acc:MGI:1343180]	4.70628	2.23459	0.0340112
Grb7	growth factor receptor bound protein 7 [Source:MGI Symbol;Acc:MGI:102683]	4.70045	2.2328	0.0261671
Ptgdr	prostaglandin D receptor [Source:MGI Symbol;Acc:MGI:102966]	4.69009	2.22961	0.00326237
Ace2	angiotensin I converting enzyme (peptidyl-dipeptidase A) 2 [Source:MGI Symbol;Acc:MGI:1917258]	4.66707	2.22252	1.13371e-05
Gm4876	predicted gene 4876 [Source:MGI Symbol;Acc:MGI:3647654]	4.64639	2.21611	2.66219e-05
Aifm3	apoptosis-inducing factor, mitochondrion-associated 3 [Source:MGI Symbol;Acc:MGI:1919418]	4.644	2.21537	0.0112181
Cdh3	cadherin 3 [Source:MGI Symbol;Acc:MGI:88356]	4.6225	2.20867	0.00398982
Cd1d1	CD1d1 antigen [Source:MGI Symbol;Acc:MGI:107674]	4.58336	2.19641	0.00132803
Mc2r	melanocortin 2 receptor [Source:MGI Symbol;Acc:MGI:96928]	4.57315	2.19319	0.0047739
Il2ra	interleukin 2 receptor, alpha chain [Source:MGI Symbol;Acc:MGI:96549]	4.57014	2.19224	0.0213467
Nxnl1	nucleoredoxin-like 1 [Source:MGI Symbol;Acc:MGI:1924446]	4.56307	2.19001	0.0461085
C7	complement component 7 [Source:MGI Symbol;Acc:MGI:88235]	4.56127	2.18944	0.0110766
Krt222	keratin 222 [Source:MGI Symbol;Acc:MGI:2442728]	4.54314	2.18369	0.0159964
Sh3rf2	SH3 domain containing ring finger 2 [Source:MGI Symbol;Acc:MGI:2444628]	4.54037	2.18281	3.20513e-06
Adgra1	adhesion G protein-coupled receptor A1 [Source:MGI Symbol;Acc:MGI:1277167]	4.52253	2.17713	8.7515e-07
Gm43034	predicted gene 43034 [Source:MGI Symbol;Acc:MGI:5663171]	4.48949	2.16655	0.000449674
Scd1	stearoyl-Coenzyme A desaturase 1 [Source:MGI Symbol;Acc:MGI:98239]	4.48147	2.16397	0.00645519
Mrgprh	MAS-related GPR, member H [Source:MGI Symbol;Acc:MGI:1934134]	4.46787	2.15959	0.011609
Adamtsl3	ADAMTS-like 3 [Source:MGI Symbol;Acc:MGI:3028499]	4.46194	2.15767	4.57206e-06
Slc8a3	solute carrier family 8 (sodium/calcium exchanger), member 3 [Source:MGI Symbol;Acc:MGI:107976]	4.45905	2.15674	6.15111e-05
2310002F09Rik	RIKEN cDNA 2310002F09 gene [Source:MGI Symbol;Acc:MGI:1916779]	4.4465	2.15267	0.00642886
Kcnt1	potassium channel, subfamily T, member 1 [Source:MGI Symbol;Acc:MGI:1924627]	4.41804	2.14341	0.0216994
Sgip1	SH3-domain GRB2-like (endophilin) interacting protein 1 [Source:MGI Symbol;Acc:MGI:1920344]	4.3994	2.13731	3.62052e-12
Sv2b	synaptic vesicle glycoprotein 2 b [Source:MGI Symbol;Acc:MGI:1927338]	4.39569	2.13609	3.11624e-05
Prr16	proline rich 16 [Source:MGI Symbol;Acc:MGI:1918623]	4.39179	2.13481	0.00448789
Efnb3	ephrin B3 [Source:MGI Symbol;Acc:MGI:109196]	4.37495	2.12927	6.21419e-05
Smoc1	SPARC related modular calcium binding 1 [Source:MGI Symbol;Acc:MGI:1929878]	4.37234	2.12841	0.0399154
Klk8	kallikrein related-peptidase 8 [Source:MGI Symbol;Acc:MGI:1343327]	4.36496	2.12597	1.498e-06
Phkg1	phosphorylase kinase gamma 1 [Source:MGI Symbol;Acc:MGI:97579]	4.36122	2.12473	0.0228859
Gm13749	predicted gene 13749 [Source:MGI Symbol;Acc:MGI:3649721]	4.33561	2.11624	0.000644464
Shc2	SHC (Src homology 2 domain containing) transforming protein 2 [Source:MGI Symbol;Acc:MGI:106180]	4.33224	2.11511	3.57957e-09
Clstn3	calsyntenin 3 [Source:MGI Symbol;Acc:MGI:2178323]	4.32912	2.11408	1.23937e-06
Txlnb	taxilin beta [Source:MGI Symbol;Acc:MGI:2671945]	4.32906	2.11405	0.00948871
Gng4	guanine nucleotide binding protein (G protein), gamma 4 [Source:MGI Symbol;Acc:MGI:102703]	4.32007	2.11106	0.00016813
Wdr86	WD repeat domain 86 [Source:MGI Symbol;Acc:MGI:1915466]	4.32007	2.11105	0.00423711
Fam83a	family with sequence similarity 83, member A [Source:MGI Symbol;Acc:MGI:2447773]	4.28507	2.09932	0.00863195
Cox8b	cytochrome c oxidase subunit 8B [Source:MGI Symbol;Acc:MGI:105958]	4.28334	2.09874	0.0275432
Unc45b	unc-45 myosin chaperone B [Source:MGI Symbol;Acc:MGI:2443377]	4.27979	2.09754	0.000662608
Gfap	glial fibrillary acidic protein [Source:MGI Symbol;Acc:MGI:95697]	4.27667	2.09649	0.00302076
Tmprss5	transmembrane protease, serine 5 (spinesin) [Source:MGI Symbol;Acc:MGI:1933407]	4.2622	2.0916	0.0171331
Zcchc18	zinc finger, CCHC domain containing 18 [Source:MGI Symbol;Acc:MGI:1914245]	4.24015	2.08411	2.05614e-06
Ano4	anoctamin 4 [Source:MGI Symbol;Acc:MGI:2443344]	4.23551	2.08254	0.0144937
Slco1a4	solute carrier organic anion transporter family, member 1a4 [Source:MGI Symbol;Acc:MGI:1351896]	4.23158	2.0812	0.00121213
Gvin1	GTPase, very large interferon inducible 1 [Source:MGI Symbol;Acc:MGI:1921808]	4.20467	2.07199	0.047305
Abcc6	ATP-binding cassette, sub-family C (CFTR/MRP), member 6 [Source:MGI Symbol;Acc:MGI:1351634]	4.19679	2.06929	0.0266455
Ldlr	low density lipoprotein receptor [Source:MGI Symbol;Acc:MGI:96765]	4.19417	2.06839	5.75874e-11
Stum	mechanosensory transduction mediator [Source:MGI Symbol;Acc:MGI:2138735]	4.18252	2.06437	0.000298446
Mapk10	mitogen-activated protein kinase 10 [Source:MGI Symbol;Acc:MGI:1346863]	4.18173	2.0641	0.00266486
Tfcp2l1	transcription factor CP2-like 1 [Source:MGI Symbol;Acc:MGI:2444691]	4.1731	2.06112	7.32805e-05
Il17re	interleukin 17 receptor E [Source:MGI Symbol;Acc:MGI:1889371]	4.16969	2.05994	2.93536e-06
Gbp5	guanylate binding protein 5 [Source:MGI Symbol;Acc:MGI:2429943]	4.16804	2.05937	2.56291e-12
Tmem182	transmembrane protein 182 [Source:MGI Symbol;Acc:MGI:1923725]	4.16503	2.05833	0.0037661
Trpv1	transient receptor potential cation channel, subfamily V, member 1 [Source:MGI Symbol;Acc:MGI:1341787]	4.16276	2.05754	0.000309367
Tmem61	transmembrane protein 61 [Source:MGI Symbol;Acc:MGI:3041156]	4.15218	2.05387	0.0219766
Arhgap36	Rho GTPase activating protein 36 [Source:MGI Symbol;Acc:MGI:1922654]	4.1459	2.05169	0.0274859
Aoc3	amine oxidase, copper containing 3 [Source:MGI Symbol;Acc:MGI:1306797]	4.1426	2.05054	0.00894923
Ms4a2	membrane-spanning 4-domains, subfamily A, member 2 [Source:MGI Symbol;Acc:MGI:95495]	4.13056	2.04634	0.000551265
Sntg2	syntrophin, gamma 2 [Source:MGI Symbol;Acc:MGI:1919541]	4.12823	2.04552	0.0029076
Ablim3	actin binding LIM protein family, member 3 [Source:MGI Symbol;Acc:MGI:2442582]	4.11844	2.0421	4.33213e-11
Gpr141	G protein-coupled receptor 141 [Source:MGI Symbol;Acc:MGI:2672983]	4.11345	2.04035	0.000542089
Ffar2	free fatty acid receptor 2 [Source:MGI Symbol;Acc:MGI:2441731]	4.09916	2.03533	0.0224005
Robo2	roundabout guidance receptor 2 [Source:MGI Symbol;Acc:MGI:1890110]	4.08835	2.03152	0.00364872
H2-Q4	histocompatibility 2, Q region locus 4 [Source:MGI Symbol;Acc:MGI:95933]	4.08607	2.03071	1.25072e-06
Fmod	fibromodulin [Source:MGI Symbol;Acc:MGI:1328364]	4.07289	2.02605	0.012152
Slc26a8	solute carrier family 26, member 8 [Source:MGI Symbol;Acc:MGI:2385046]	4.06932	2.02479	0.00934981
Cpxm2	carboxypeptidase X 2 (M14 family) [Source:MGI Symbol;Acc:MGI:1926006]	4.05299	2.01899	1.10902e-29
Adra1d	adrenergic receptor, alpha 1d [Source:MGI Symbol;Acc:MGI:106673]	4.05287	2.01894	0.00539916
Wdr93	WD repeat domain 93 [Source:MGI Symbol;Acc:MGI:3646885]	4.04914	2.01762	0.00626411
Cdh10	cadherin 10 [Source:MGI Symbol;Acc:MGI:107436]	4.03954	2.01419	1.01295e-05
Grid1	glutamate receptor, ionotropic, delta 1 [Source:MGI Symbol;Acc:MGI:95812]	4.0256	2.0092	0.000924049
Crtac1	cartilage acidic protein 1 [Source:MGI Symbol;Acc:MGI:1920082]	4.01813	2.00652	0.0185258
Tcte2	t-complex-associated testis expressed 2 [Source:MGI Symbol;Acc:MGI:98641]	4.01333	2.0048	0.00111899
Gm12381	predicted gene 12381 [Source:MGI Symbol;Acc:MGI:3651851]	4.00809	2.00291	0.0356689
BC023105	cDNA sequence BC023105 [Source:MGI Symbol;Acc:MGI:2384767]	3.96269	1.98648	0.0267919
Rasd1	RAS, dexamethasone-induced 1 [Source:MGI Symbol;Acc:MGI:1270848]	3.95438	1.98345	0.0235235
Rtp3	receptor transporter protein 3 [Source:MGI Symbol;Acc:MGI:2446841]	3.93986	1.97814	0.00073104
Rbp4	retinol binding protein 4, plasma [Source:MGI Symbol;Acc:MGI:97879]	3.93184	1.9752	0.00667446
Wnt6	wingless-type MMTV integration site family, member 6 [Source:MGI Symbol;Acc:MGI:98960]	3.89273	1.96078	4.02793e-08
Rassf6	Ras association (RalGDS/AF-6) domain family member 6 [Source:MGI Symbol;Acc:MGI:1920496]	3.89116	1.9602	0.027936
St6galnac2	ST6 (alpha-N-acetyl-neuraminyl-2,3-beta-galactosyl-1,3)-N-acetylgalactosaminide alpha-2,6-sialyltransferase 2 [Source:MGI Symbol;Acc:MGI:107553]	3.87667	1.95482	0.0423068
Ntm	neurotrimin [Source:MGI Symbol;Acc:MGI:2446259]	3.87508	1.95423	9.87506e-09
Klra4	killer cell lectin-like receptor, subfamily A, member 4 [Source:MGI Symbol;Acc:MGI:101904]	3.86601	1.95085	0.0481811
Pygm	muscle glycogen phosphorylase [Source:MGI Symbol;Acc:MGI:97830]	3.85624	1.9472	1.33459e-05
Atp7b	ATPase, Cu++ transporting, beta polypeptide [Source:MGI Symbol;Acc:MGI:103297]	3.84789	1.94407	0.0343446
Gucy2c	guanylate cyclase 2c [Source:MGI Symbol;Acc:MGI:106903]	3.84511	1.94303	0.00474445
Kcnip3	Kv channel interacting protein 3, calsenilin [Source:MGI Symbol;Acc:MGI:1929258]	3.83732	1.9401	3.83163e-06
Klre1	killer cell lectin-like receptor family E member 1 [Source:MGI Symbol;Acc:MGI:2662547]	3.83214	1.93815	0.0305163
Adra1a	adrenergic receptor, alpha 1a [Source:MGI Symbol;Acc:MGI:104773]	3.83152	1.93792	0.00839166
Fsd2	fibronectin type III and SPRY domain containing 2 [Source:MGI Symbol;Acc:MGI:2444310]	3.8259	1.9358	0.0230099
Acss2	acyl-CoA synthetase short-chain family member 2 [Source:MGI Symbol;Acc:MGI:1890410]	3.81495	1.93166	0.00497774
Tbx1	T-box 1 [Source:MGI Symbol;Acc:MGI:98493]	3.81253	1.93075	0.0409544
Pla2g2d	phospholipase A2, group IID [Source:MGI Symbol;Acc:MGI:1341796]	3.80467	1.92777	0.0353583
Gpr21	G protein-coupled receptor 21 [Source:MGI Symbol;Acc:MGI:2441890]	3.7955	1.92429	0.0216994
Apcdd1	adenomatosis polyposis coli down-regulated 1 [Source:MGI Symbol;Acc:MGI:3513977]	3.79314	1.92339	4.12885e-10
Tmem255a	transmembrane protein 255A [Source:MGI Symbol;Acc:MGI:3045722]	3.78769	1.92132	0.00074515
Stk32a	serine/threonine kinase 32A [Source:MGI Symbol;Acc:MGI:2442403]	3.77776	1.91753	0.0181522
Slc26a10	solute carrier family 26, member 10 [Source:MGI Symbol;Acc:MGI:2143920]	3.7733	1.91583	0.0279787
Asic2	acid-sensing (proton-gated) ion channel 2 [Source:MGI Symbol;Acc:MGI:1100867]	3.76925	1.91428	0.031678
Myoc	myocilin [Source:MGI Symbol;Acc:MGI:1202864]	3.76716	1.91348	0.000520255
Fam180a	family with sequence similarity 180, member A [Source:MGI Symbol;Acc:MGI:3039626]	3.75896	1.91033	9.92099e-06
Cacng7	calcium channel, voltage-dependent, gamma subunit 7 [Source:MGI Symbol;Acc:MGI:1932374]	3.74701	1.90574	4.67451e-06
Tbx3os1	T-box 3, opposite strand 1 [Source:MGI Symbol;Acc:MGI:3780472]	3.7295	1.89898	0.0020224
Scube3	signal peptide, CUB domain, EGF-like 3 [Source:MGI Symbol;Acc:MGI:3045253]	3.72393	1.89683	0.00547068
Zyg11a	zyg-11 family member A, cell cycle regulator [Source:MGI Symbol;Acc:MGI:2446208]	3.70833	1.89077	0.0179036
Sbk3	SH3 domain binding kinase family, member 3 [Source:MGI Symbol;Acc:MGI:2685924]	3.69131	1.88413	0.042663
Gm53	predicted gene 53 [Source:MGI Symbol;Acc:MGI:2684899]	3.69116	1.88408	0.00570287
Sh2d4b	SH2 domain containing 4B [Source:MGI Symbol;Acc:MGI:1925182]	3.68681	1.88237	0.0104126
Lsamp	limbic system-associated membrane protein [Source:MGI Symbol;Acc:MGI:1261760]	3.68349	1.88108	0.00118507
Vwa3a	von Willebrand factor A domain containing 3A [Source:MGI Symbol;Acc:MGI:3041229]	3.67908	1.87935	0.0184102
Mmp9	matrix metallopeptidase 9 [Source:MGI Symbol;Acc:MGI:97011]	3.67889	1.87927	0.0281638
Smad9	SMAD family member 9 [Source:MGI Symbol;Acc:MGI:1859993]	3.67634	1.87827	2.12346e-05
Gm15519	predicted gene 15519 [Source:MGI Symbol;Acc:MGI:3782965]	3.67159	1.87641	0.0184518
Lypd6b	LY6/PLAUR domain containing 6B [Source:MGI Symbol;Acc:MGI:1919147]	3.66398	1.87341	0.00393839
Gbp11	guanylate binding protein 11 [Source:MGI Symbol;Acc:MGI:3646307]	3.65388	1.86943	0.0330807
Gm45716	predicted gene 45716 [Source:MGI Symbol;Acc:MGI:5804831]	3.63494	1.86193	0.00133829
Bcl6b	B cell CLL/lymphoma 6, member B [Source:MGI Symbol;Acc:MGI:1278332]	3.6317	1.86064	2.90637e-07
Pcdh12	protocadherin 12 [Source:MGI Symbol;Acc:MGI:1855700]	3.6303	1.86009	5.14152e-05
Rbp7	retinol binding protein 7, cellular [Source:MGI Symbol;Acc:MGI:1890409]	3.62978	1.85988	0.0495999
Pde1c	phosphodiesterase 1C [Source:MGI Symbol;Acc:MGI:108413]	3.62143	1.85656	9.82454e-07
Pabpc1l	poly(A) binding protein, cytoplasmic 1-like [Source:MGI Symbol;Acc:MGI:1922908]	3.61432	1.85372	0.0128653
Gm17705	predicted gene, 17705 [Source:MGI Symbol;Acc:MGI:4937339]	3.61175	1.8527	0.0494104
Mettl7b	methyltransferase like 7B [Source:MGI Symbol;Acc:MGI:1918914]	3.60574	1.8503	0.000540132
Acsbg1	acyl-CoA synthetase bubblegum family member 1 [Source:MGI Symbol;Acc:MGI:2385656]	3.59411	1.84564	0.000859323
Nr4a3	nuclear receptor subfamily 4, group A, member 3 [Source:MGI Symbol;Acc:MGI:1352457]	3.59226	1.84489	0.00370762
Kcna4	potassium voltage-gated channel, shaker-related subfamily, member 4 [Source:MGI Symbol;Acc:MGI:96661]	3.58497	1.84196	1.91553e-06
AW112010	expressed sequence AW112010 [Source:MGI Symbol;Acc:MGI:2147706]	3.57839	1.83931	2.98602e-07
Astn2	astrotactin 2 [Source:MGI Symbol;Acc:MGI:1889277]	3.56305	1.83311	5.03067e-05
Col23a1	collagen, type XXIII, alpha 1 [Source:MGI Symbol;Acc:MGI:2653243]	3.56246	1.83287	4.68788e-10
Plekha6	pleckstrin homology domain containing, family A member 6 [Source:MGI Symbol;Acc:MGI:2388662]	3.56232	1.83282	8.76656e-07
Synpo2	synaptopodin 2 [Source:MGI Symbol;Acc:MGI:2153070]	3.56009	1.83191	0.000826501
Cacnb2	calcium channel, voltage-dependent, beta 2 subunit [Source:MGI Symbol;Acc:MGI:894644]	3.55499	1.82984	0.00573909
Gm42778	predicted gene 42778 [Source:MGI Symbol;Acc:MGI:5662915]	3.55363	1.8293	0.016468
Tnnt2	troponin T2, cardiac [Source:MGI Symbol;Acc:MGI:104597]	3.54788	1.82696	0.0252286
Snhg11	small nucleolar RNA host gene 11 [Source:MGI Symbol;Acc:MGI:2441845]	3.54726	1.8267	1.77771e-07
Nlgn3	neuroligin 3 [Source:MGI Symbol;Acc:MGI:2444609]	3.54423	1.82547	0.00123513
Slc25a35	solute carrier family 25, member 35 [Source:MGI Symbol;Acc:MGI:1919248]	3.54394	1.82535	3.89306e-08
1810010H24Rik	RIKEN cDNA 1810010H24 gene [Source:MGI Symbol;Acc:MGI:1916316]	3.5408	1.82407	0.00117592
Tmem25	transmembrane protein 25 [Source:MGI Symbol;Acc:MGI:1918937]	3.53983	1.82368	0.0120494
Unc5c	unc-5 netrin receptor C [Source:MGI Symbol;Acc:MGI:1095412]	3.53692	1.82249	3.56776e-09
Ppp1r3c	protein phosphatase 1, regulatory subunit 3C [Source:MGI Symbol;Acc:MGI:1858229]	3.52567	1.8179	0.000628849
Tnfsf15	tumor necrosis factor (ligand) superfamily, member 15 [Source:MGI Symbol;Acc:MGI:2180140]	3.51754	1.81457	0.000380009
Gm19426	predicted gene, 19426 [Source:MGI Symbol;Acc:MGI:5011611]	3.5126	1.81254	0.0188617
Upb1	ureidopropionase, beta [Source:MGI Symbol;Acc:MGI:2143535]	3.51259	1.81254	0.0128653
Tnfrsf11b	tumor necrosis factor receptor superfamily, member 11b (osteoprotegerin) [Source:MGI Symbol;Acc:MGI:109587]	3.51117	1.81195	8.31358e-05
Bmper	BMP-binding endothelial regulator [Source:MGI Symbol;Acc:MGI:1920480]	3.50555	1.80964	6.97113e-05
Gm6981	predicted pseudogene 6981 [Source:MGI Symbol;Acc:MGI:3646966]	3.50142	1.80794	0.0204483
Nlrc5	NLR family, CARD domain containing 5 [Source:MGI Symbol;Acc:MGI:3612191]	3.49516	1.80536	0.00101171
Ccdc88c	coiled-coil domain containing 88C [Source:MGI Symbol;Acc:MGI:1915589]	3.49207	1.80408	0.0342943
A930033H14Rik	RIKEN cDNA A930033H14 gene [Source:MGI Symbol;Acc:MGI:2444562]	3.47286	1.79612	0.00125605
Wnt10a	wingless-type MMTV integration site family, member 10A [Source:MGI Symbol;Acc:MGI:108071]	3.46316	1.79209	0.000413348
Dapk2	death-associated protein kinase 2 [Source:MGI Symbol;Acc:MGI:1341297]	3.46011	1.79082	9.8228e-06
Clstn2	calsyntenin 2 [Source:MGI Symbol;Acc:MGI:1929897]	3.45805	1.78996	0.000449672
Gm44899	predicted gene 44899 [Source:MGI Symbol;Acc:MGI:5753475]	3.45501	1.78869	0.0499875
Gm43196	predicted gene 43196 [Source:MGI Symbol;Acc:MGI:5663333]	3.45319	1.78793	0.0270299
Stac	src homology three (SH3) and cysteine rich domain [Source:MGI Symbol;Acc:MGI:1201400]	3.44948	1.78638	0.00109249
Wnk2	WNK lysine deficient protein kinase 2 [Source:MGI Symbol;Acc:MGI:1922857]	3.4456	1.78475	0.00490048
Kcnj8	potassium inwardly-rectifying channel, subfamily J, member 8 [Source:MGI Symbol;Acc:MGI:1100508]	3.44235	1.7834	0.00243921
Cd300lg	CD300 molecule like family member G [Source:MGI Symbol;Acc:MGI:1289168]	3.44121	1.78292	0.00722271
Sez6	seizure related gene 6 [Source:MGI Symbol;Acc:MGI:104745]	3.43847	1.78177	0.0382549
Rgcc	regulator of cell cycle [Source:MGI Symbol;Acc:MGI:1913464]	3.4342	1.77997	0.000255213
Ms4a8a	membrane-spanning 4-domains, subfamily A, member 8A [Source:MGI Symbol;Acc:MGI:1927657]	3.43037	1.77837	0.00381171
Sybu	syntabulin (syntaxin-interacting) [Source:MGI Symbol;Acc:MGI:2442392]	3.42911	1.77784	0.00490048
Rec114	REC114 meiotic recombination protein [Source:MGI Symbol;Acc:MGI:1920923]	3.42888	1.77774	0.0062038
Ccdc3	coiled-coil domain containing 3 [Source:MGI Symbol;Acc:MGI:1921436]	3.42709	1.77699	0.0315456
Papln	papilin, proteoglycan-like sulfated glycoprotein [Source:MGI Symbol;Acc:MGI:2386139]	3.42489	1.77606	0.0107038
Cyp11a1	cytochrome P450, family 11, subfamily a, polypeptide 1 [Source:MGI Symbol;Acc:MGI:88582]	3.42093	1.77439	0.0408752
Hspb7	heat shock protein family, member 7 (cardiovascular) [Source:MGI Symbol;Acc:MGI:1352494]	3.42072	1.7743	0.0431155
Gm12216	predicted gene 12216 [Source:MGI Symbol;Acc:MGI:3650088]	3.42008	1.77403	0.0284213
Cnr1	cannabinoid receptor 1 (brain) [Source:MGI Symbol;Acc:MGI:104615]	3.39568	1.7637	0.000430024
Cux2	cut-like homeobox 2 [Source:MGI Symbol;Acc:MGI:107321]	3.39082	1.76164	0.0454555
Slc2a4	solute carrier family 2 (facilitated glucose transporter), member 4 [Source:MGI Symbol;Acc:MGI:95758]	3.38972	1.76116	0.00419794
Smkr-ps	smal lysine rich protein 1, pseudogene [Source:MGI Symbol;Acc:MGI:1923669]	3.38456	1.75897	0.0236639
Slc6a12	solute carrier family 6 (neurotransmitter transporter, betaine/GABA), member 12 [Source:MGI Symbol;Acc:MGI:95628]	3.37716	1.75581	9.57723e-06
Boc	biregional cell adhesion molecule-related/down-regulated by oncogenes (Cdon) binding protein [Source:MGI Symbol;Acc:MGI:2151153]	3.37517	1.75496	0.00222732
Lipe	lipase, hormone sensitive [Source:MGI Symbol;Acc:MGI:96790]	3.3741	1.7545	0.0124831
2810433D01Rik	RIKEN cDNA 2810433D01 gene [Source:MGI Symbol;Acc:MGI:1924382]	3.36631	1.75117	0.000189548
Sncg	synuclein, gamma [Source:MGI Symbol;Acc:MGI:1298397]	3.36147	1.74909	1.2138e-08
Plcd3	phospholipase C, delta 3 [Source:MGI Symbol;Acc:MGI:107451]	3.35754	1.7474	1.0472e-08
Des	desmin [Source:MGI Symbol;Acc:MGI:94885]	3.35639	1.74691	0.0234071
Prkcg	protein kinase C, gamma [Source:MGI Symbol;Acc:MGI:97597]	3.34762	1.74313	0.00734657
Gm13261	predicted gene 13261 [Source:MGI Symbol;Acc:MGI:3650831]	3.34609	1.74248	0.000543936
Zbtb7c	zinc finger and BTB domain containing 7C [Source:MGI Symbol;Acc:MGI:2443302]	3.34329	1.74127	0.000634485
Slc16a12	solute carrier family 16 (monocarboxylic acid transporters), member 12 [Source:MGI Symbol;Acc:MGI:2147716]	3.34066	1.74013	0.0410255
Ramp3	receptor (calcitonin) activity modifying protein 3 [Source:MGI Symbol;Acc:MGI:1860292]	3.33513	1.73774	0.0160194
Krt19	keratin 19 [Source:MGI Symbol;Acc:MGI:96693]	3.32959	1.73534	9.92099e-06
Pcdhb9	protocadherin beta 9 [Source:MGI Symbol;Acc:MGI:2136744]	3.32929	1.73521	0.000162349
Proser2	proline and serine rich 2 [Source:MGI Symbol;Acc:MGI:2442238]	3.32652	1.73401	8.75103e-07
Paqr6	progestin and adipoQ receptor family member VI [Source:MGI Symbol;Acc:MGI:1916207]	3.3242	1.73301	8.16405e-06
Slc24a3	solute carrier family 24 (sodium/potassium/calcium exchanger), member 3 [Source:MGI Symbol;Acc:MGI:2137513]	3.32227	1.73217	5.54685e-11
Miat	myocardial infarction associated transcript (non-protein coding) [Source:MGI Symbol;Acc:MGI:2444886]	3.31232	1.72784	0.0114468
Arhgef16	Rho guanine nucleotide exchange factor (GEF) 16 [Source:MGI Symbol;Acc:MGI:2446219]	3.31032	1.72697	0.00358004
Bmpr1b	bone morphogenetic protein receptor, type 1B [Source:MGI Symbol;Acc:MGI:107191]	3.30716	1.72559	0.000644777
Gpt	glutamic pyruvic transaminase, soluble [Source:MGI Symbol;Acc:MGI:95802]	3.30343	1.72396	0.00701421
Lrrn1	leucine rich repeat protein 1, neuronal [Source:MGI Symbol;Acc:MGI:106038]	3.30328	1.7239	9.36331e-05
Flrt1	fibronectin leucine rich transmembrane protein 1 [Source:MGI Symbol;Acc:MGI:3026647]	3.29582	1.72064	0.00570999
Lad1	ladinin [Source:MGI Symbol;Acc:MGI:109343]	3.29575	1.72061	2.42462e-05
Lrrc36	leucine rich repeat containing 36 [Source:MGI Symbol;Acc:MGI:2448585]	3.29255	1.71921	0.0146099
Ptprd	protein tyrosine phosphatase, receptor type, D [Source:MGI Symbol;Acc:MGI:97812]	3.29097	1.71851	0.00852332
Slamf8	SLAM family member 8 [Source:MGI Symbol;Acc:MGI:1921998]	3.27217	1.71025	0.0108047
Begain	brain-enriched guanylate kinase-associated [Source:MGI Symbol;Acc:MGI:3044626]	3.2645	1.70686	2.98602e-07
Klrb1c	killer cell lectin-like receptor subfamily B member 1C [Source:MGI Symbol;Acc:MGI:107538]	3.2635	1.70642	0.0425178
Slc44a3	solute carrier family 44, member 3 [Source:MGI Symbol;Acc:MGI:2384860]	3.26296	1.70618	0.0373343
Bche	butyrylcholinesterase [Source:MGI Symbol;Acc:MGI:894278]	3.2615	1.70554	0.0468913
Kcnj13	potassium inwardly-rectifying channel, subfamily J, member 13 [Source:MGI Symbol;Acc:MGI:3781032]	3.26087	1.70526	3.24795e-05
Arl4d	ADP-ribosylation factor-like 4D [Source:MGI Symbol;Acc:MGI:1933155]	3.25711	1.70359	0.00396547
Tpsab1	tryptase alpha/beta 1 [Source:MGI Symbol;Acc:MGI:96943]	3.24794	1.69953	0.0202851
Stc2	stanniocalcin 2 [Source:MGI Symbol;Acc:MGI:1316731]	3.24496	1.6982	0.0432218
Tmem196	transmembrane protein 196 [Source:MGI Symbol;Acc:MGI:2685374]	3.23833	1.69525	0.00883441
Atp2a3	ATPase, Ca++ transporting, ubiquitous [Source:MGI Symbol;Acc:MGI:1194503]	3.23424	1.69343	0.0132814
B3gat1	beta-1,3-glucuronyltransferase 1 (glucuronosyltransferase P) [Source:MGI Symbol;Acc:MGI:1924148]	3.22612	1.6898	0.00761694
Prkcz	protein kinase C, zeta [Source:MGI Symbol;Acc:MGI:97602]	3.2253	1.68943	3.65223e-05
Pcdhb4	protocadherin beta 4 [Source:MGI Symbol;Acc:MGI:2136738]	3.21676	1.68561	0.000366368
Hoxd3os1	homeobox D3, opposite strand 1 [Source:MGI Symbol;Acc:MGI:1923875]	3.20872	1.682	0.0182952
Ndufa4l2	Ndufa4, mitochondrial complex associated like 2 [Source:MGI Symbol;Acc:MGI:3039567]	3.20859	1.68194	0.000534052
Gm11611	predicted gene 11611 [Source:MGI Symbol;Acc:MGI:3707011]	3.2055	1.68055	0.0130671
Col5a3	collagen, type V, alpha 3 [Source:MGI Symbol;Acc:MGI:1858212]	3.20064	1.67836	0.000159766
Gper1	G protein-coupled estrogen receptor 1 [Source:MGI Symbol;Acc:MGI:1924104]	3.19173	1.67434	0.00646826
Dock3	dedicator of cyto-kinesis 3 [Source:MGI Symbol;Acc:MGI:2429763]	3.1769	1.66762	0.0400352
Fcor	Foxo1 corepressor [Source:MGI Symbol;Acc:MGI:1915484]	3.17061	1.66476	0.0195472
Sv2a	synaptic vesicle glycoprotein 2 a [Source:MGI Symbol;Acc:MGI:1927139]	3.16528	1.66233	0.0201666
Ppp1r1a	protein phosphatase 1, regulatory inhibitor subunit 1A [Source:MGI Symbol;Acc:MGI:1889595]	3.15883	1.65939	0.00015805
Gm42892	predicted gene 42892 [Source:MGI Symbol;Acc:MGI:5663029]	3.15617	1.65817	0.00478256
Msx1	msh homeobox 1 [Source:MGI Symbol;Acc:MGI:97168]	3.15606	1.65813	0.00411142
Gimap4	GTPase, IMAP family member 4 [Source:MGI Symbol;Acc:MGI:1349656]	3.15274	1.65661	0.00661743
Lrrc18	leucine rich repeat containing 18 [Source:MGI Symbol;Acc:MGI:1914830]	3.14789	1.65438	0.0367882
Gm28932	predicted gene 28932 [Source:MGI Symbol;Acc:MGI:5579638]	3.14513	1.65312	0.0402942
Cd200r3	CD200 receptor 3 [Source:MGI Symbol;Acc:MGI:1921853]	3.13807	1.64988	0.00511043
Cyr61	cysteine rich protein 61 [Source:MGI Symbol;Acc:MGI:88613]	3.13461	1.64829	0.010889
Tgm1	transglutaminase 1, K polypeptide [Source:MGI Symbol;Acc:MGI:98730]	3.13443	1.6482	0.0282758
Ifit1	interferon-induced protein with tetratricopeptide repeats 1 [Source:MGI Symbol;Acc:MGI:99450]	3.13376	1.6479	0.00692093
Pawr	PRKC, apoptosis, WT1, regulator [Source:MGI Symbol;Acc:MGI:2149961]	3.12924	1.64581	1.42442e-05
Eepd1	endonuclease/exonuclease/phosphatase family domain containing 1 [Source:MGI Symbol;Acc:MGI:1914734]	3.12292	1.6429	2.55288e-05
Notch3	notch 3 [Source:MGI Symbol;Acc:MGI:99460]	3.11977	1.64144	0.0118365
Klf5	Kruppel-like factor 5 [Source:MGI Symbol;Acc:MGI:1338056]	3.11318	1.63839	7.12598e-05
Amy1	amylase 1, salivary [Source:MGI Symbol;Acc:MGI:88019]	3.10572	1.63493	0.000628849
Lmo7	LIM domain only 7 [Source:MGI Symbol;Acc:MGI:1353586]	3.09384	1.6294	0.000258128
Cxcl12	chemokine (C-X-C motif) ligand 12 [Source:MGI Symbol;Acc:MGI:103556]	3.0809	1.62335	0.000680379
Negr1	neuronal growth regulator 1 [Source:MGI Symbol;Acc:MGI:2444846]	3.07524	1.6207	1.38485e-08
Gpr1	G protein-coupled receptor 1 [Source:MGI Symbol;Acc:MGI:2385324]	3.07117	1.61879	0.00667446
Mx2	MX dynamin-like GTPase 2 [Source:MGI Symbol;Acc:MGI:97244]	3.06961	1.61806	0.0279633
Slc18a2	solute carrier family 18 (vesicular monoamine), member 2 [Source:MGI Symbol;Acc:MGI:106677]	3.06809	1.61734	0.0134078
Mkx	mohawk homeobox [Source:MGI Symbol;Acc:MGI:2687286]	3.05952	1.61331	0.00118857
Cmpk2	cytidine monophosphate (UMP-CMP) kinase 2, mitochondrial [Source:MGI Symbol;Acc:MGI:99830]	3.05908	1.6131	1.1166e-05
Fry	FRY microtubule binding protein [Source:MGI Symbol;Acc:MGI:2443895]	3.05808	1.61262	1.16481e-06
Map7d3	MAP7 domain containing 3 [Source:MGI Symbol;Acc:MGI:2445051]	3.05334	1.61039	0.0411025
Pcsk4	proprotein convertase subtilisin/kexin type 4 [Source:MGI Symbol;Acc:MGI:97514]	3.04188	1.60496	0.0468913
Styk1	serine/threonine/tyrosine kinase 1 [Source:MGI Symbol;Acc:MGI:2141396]	3.02788	1.59831	0.00290701
Pln	phospholamban [Source:MGI Symbol;Acc:MGI:97622]	3.02754	1.59815	0.0141372
Pcdhac2	protocadherin alpha subfamily C, 2 [Source:MGI Symbol;Acc:MGI:1891443]	3.01878	1.59396	0.0234386
Spint2	serine protease inhibitor, Kunitz type 2 [Source:MGI Symbol;Acc:MGI:1338031]	3.0163	1.59278	0.00188504
Doc2b	double C2, beta [Source:MGI Symbol;Acc:MGI:1100497]	3.01005	1.58979	0.031667
Gm7887	predicted gene 7887 [Source:MGI Symbol;Acc:MGI:3648251]	3.00957	1.58956	0.0411025
Carmn	cardiac mesoderm enhancer-associated non-coding RNA [Source:MGI Symbol;Acc:MGI:4439832]	2.98598	1.5782	0.0224094
Thsd4	thrombospondin, type I, domain containing 4 [Source:MGI Symbol;Acc:MGI:2672033]	2.98494	1.5777	3.38159e-10
Ecm2	extracellular matrix protein 2, female organ and adipocyte specific [Source:MGI Symbol;Acc:MGI:3039578]	2.98456	1.57752	0.00133367
D830026I12Rik	RIKEN cDNA D830026I12 gene [Source:MGI Symbol;Acc:MGI:2442531]	2.9779	1.57429	0.0103609
St6galnac5	ST6 (alpha-N-acetyl-neuraminyl-2,3-beta-galactosyl-1,3)-N-acetylgalactosaminide alpha-2,6-sialyltransferase 5 [Source:MGI Symbol;Acc:MGI:1349471]	2.97747	1.57409	0.000176076
Mrgprb2	MAS-related GPR, member B2 [Source:MGI Symbol;Acc:MGI:2441674]	2.97692	1.57382	0.0170954
Mansc4	MANSC domain containing 4 [Source:MGI Symbol;Acc:MGI:3645619]	2.9761	1.57342	0.0224005
Hepacam2	HEPACAM family member 2 [Source:MGI Symbol;Acc:MGI:2141520]	2.97298	1.57191	0.00392031
Gbp9	guanylate-binding protein 9 [Source:MGI Symbol;Acc:MGI:3605620]	2.97189	1.57138	8.92239e-06
Atp8b5	ATPase, class I, type 8B, member 5 [Source:MGI Symbol;Acc:MGI:2444287]	2.96866	1.56981	0.00483794
Cbx7	chromobox 7 [Source:MGI Symbol;Acc:MGI:1196439]	2.96852	1.56974	4.80488e-06
Cgn	cingulin [Source:MGI Symbol;Acc:MGI:1927237]	2.94311	1.55734	0.00378022
Dhcr24	24-dehydrocholesterol reductase [Source:MGI Symbol;Acc:MGI:1922004]	2.93671	1.5542	6.09106e-06
Gm44220	predicted gene, 44220 [Source:MGI Symbol;Acc:MGI:5690612]	2.93447	1.5531	0.000146694
Adhfe1	alcohol dehydrogenase, iron containing, 1 [Source:MGI Symbol;Acc:MGI:1923437]	2.93437	1.55305	0.0267127
Grin2b	glutamate receptor, ionotropic, NMDA2B (epsilon 2) [Source:MGI Symbol;Acc:MGI:95821]	2.9324	1.55208	0.00160578
Moxd1	monooxygenase, DBH-like 1 [Source:MGI Symbol;Acc:MGI:1921582]	2.93218	1.55197	0.00526752
Fam19a2	family with sequence similarity 19, member A2 [Source:MGI Symbol;Acc:MGI:2143691]	2.9319	1.55183	0.00319523
Dcaf12l1	DDB1 and CUL4 associated factor 12-like 1 [Source:MGI Symbol;Acc:MGI:2444462]	2.92957	1.55069	0.0133705
Hoxc11	homeobox C11 [Source:MGI Symbol;Acc:MGI:96193]	2.92683	1.54934	0.000575106
Clu	clusterin [Source:MGI Symbol;Acc:MGI:88423]	2.92216	1.54703	0.0498272
Clic5	chloride intracellular channel 5 [Source:MGI Symbol;Acc:MGI:1917912]	2.92023	1.54608	3.17191e-05
Jph2	junctophilin 2 [Source:MGI Symbol;Acc:MGI:1891496]	2.92004	1.54599	0.000263671
Rbm24	RNA binding motif protein 24 [Source:MGI Symbol;Acc:MGI:3610364]	2.91265	1.54233	0.00376221
Dchs2	dachsous cadherin related 2 [Source:MGI Symbol;Acc:MGI:2685263]	2.91253	1.54227	6.99404e-07
Ddo	D-aspartate oxidase [Source:MGI Symbol;Acc:MGI:1925528]	2.91053	1.54128	0.0428125
Cap2	CAP, adenylate cyclase-associated protein, 2 (yeast) [Source:MGI Symbol;Acc:MGI:1914502]	2.90889	1.54047	0.00672989
Pcp4	Purkinje cell protein 4 [Source:MGI Symbol;Acc:MGI:97509]	2.89908	1.53559	0.0305001
Elmo3	engulfment and cell motility 3 [Source:MGI Symbol;Acc:MGI:2679007]	2.89704	1.53458	0.00260801
Nebl	nebulette [Source:MGI Symbol;Acc:MGI:1921353]	2.89467	1.5334	4.76295e-09
Cpne7	copine VII [Source:MGI Symbol;Acc:MGI:2142747]	2.8933	1.53272	0.00186812
Ifi47	interferon gamma inducible protein 47 [Source:MGI Symbol;Acc:MGI:99448]	2.89127	1.5317	0.000475667
Susd2	sushi domain containing 2 [Source:MGI Symbol;Acc:MGI:1918983]	2.89033	1.53124	0.00123348
Shisa7	shisa family member 7 [Source:MGI Symbol;Acc:MGI:3605641]	2.88414	1.52814	0.00302218
Gng8	guanine nucleotide binding protein (G protein), gamma 8 [Source:MGI Symbol;Acc:MGI:109163]	2.88255	1.52735	0.00713177
Nrip2	nuclear receptor interacting protein 2 [Source:MGI Symbol;Acc:MGI:1891884]	2.878	1.52506	3.65449e-05
Rgs6	regulator of G-protein signaling 6 [Source:MGI Symbol;Acc:MGI:1354730]	2.87513	1.52363	0.000489993
Tph1	tryptophan hydroxylase 1 [Source:MGI Symbol;Acc:MGI:98796]	2.86231	1.51718	0.0419579
Lag3	lymphocyte-activation gene 3 [Source:MGI Symbol;Acc:MGI:106588]	2.8555	1.51374	0.0419404
Faah	fatty acid amide hydrolase [Source:MGI Symbol;Acc:MGI:109609]	2.85352	1.51274	0.0417112
Npy1r	neuropeptide Y receptor Y1 [Source:MGI Symbol;Acc:MGI:104963]	2.8535	1.51273	0.041853
Bmp3	bone morphogenetic protein 3 [Source:MGI Symbol;Acc:MGI:88179]	2.85137	1.51166	0.00511414
Ass1	argininosuccinate synthetase 1 [Source:MGI Symbol;Acc:MGI:88090]	2.851	1.51147	0.000658221
Vwa3b	von Willebrand factor A domain containing 3B [Source:MGI Symbol;Acc:MGI:1918103]	2.85046	1.51119	0.0274668
Scn4b	sodium channel, type IV, beta [Source:MGI Symbol;Acc:MGI:2687406]	2.84758	1.50973	5.19179e-05
Tmem44	transmembrane protein 44 [Source:MGI Symbol;Acc:MGI:1924489]	2.84399	1.50792	6.02829e-09
A430035B10Rik	RIKEN cDNA A430035B10 gene [Source:MGI Symbol;Acc:MGI:2443789]	2.83808	1.50492	0.00341625
Slc6a13	solute carrier family 6 (neurotransmitter transporter, GABA), member 13 [Source:MGI Symbol;Acc:MGI:95629]	2.82938	1.50049	0.000635517
Atoh8	atonal bHLH transcription factor 8 [Source:MGI Symbol;Acc:MGI:1918343]	2.82753	1.49954	0.00253778
Aldh3b2	aldehyde dehydrogenase 3 family, member B2 [Source:MGI Symbol;Acc:MGI:2147613]	2.82666	1.4991	0.047305
C630043F03Rik	RIKEN cDNA C630043F03 gene [Source:MGI Symbol;Acc:MGI:1915535]	2.82235	1.49689	0.00114728
Ocln	occludin [Source:MGI Symbol;Acc:MGI:106183]	2.81676	1.49403	0.000458957
Scara3	scavenger receptor class A, member 3 [Source:MGI Symbol;Acc:MGI:2444418]	2.81403	1.49264	1.25072e-06
Fam189a2	family with sequence similarity 189, member A2 [Source:MGI Symbol;Acc:MGI:2685813]	2.80906	1.49009	1.74807e-05
Wscd2	WSC domain containing 2 [Source:MGI Symbol;Acc:MGI:2445030]	2.80613	1.48858	0.0122258
Ebf4	early B cell factor 4 [Source:MGI Symbol;Acc:MGI:2385972]	2.80556	1.48829	0.00137542
Gbp2	guanylate binding protein 2 [Source:MGI Symbol;Acc:MGI:102772]	2.80495	1.48798	2.09626e-10
Gsn	gelsolin [Source:MGI Symbol;Acc:MGI:95851]	2.80349	1.48723	0.000151466
Tnfsf13b	tumor necrosis factor (ligand) superfamily, member 13b [Source:MGI Symbol;Acc:MGI:1344376]	2.80222	1.48657	0.00987178
Mylk	myosin, light polypeptide kinase [Source:MGI Symbol;Acc:MGI:894806]	2.79963	1.48524	0.00186834
Heyl	hairy/enhancer-of-split related with YRPW motif-like [Source:MGI Symbol;Acc:MGI:1860511]	2.79615	1.48344	0.00171366
Dll4	delta like canonical Notch ligand 4 [Source:MGI Symbol;Acc:MGI:1859388]	2.79487	1.48278	0.00294234
Rhpn2	rhophilin, Rho GTPase binding protein 2 [Source:MGI Symbol;Acc:MGI:1289234]	2.79317	1.4819	0.000337762
Aox3	aldehyde oxidase 3 [Source:MGI Symbol;Acc:MGI:1918974]	2.79173	1.48116	0.0236879
9530026P05Rik	RIKEN cDNA 9530026P05 gene [Source:MGI Symbol;Acc:MGI:1924659]	2.79008	1.4803	2.5838e-05
Igtp	interferon gamma induced GTPase [Source:MGI Symbol;Acc:MGI:107729]	2.78604	1.47822	7.05635e-07
Kit	KIT proto-oncogene receptor tyrosine kinase [Source:MGI Symbol;Acc:MGI:96677]	2.78443	1.47738	0.0156946
Rasl12	RAS-like, family 12 [Source:MGI Symbol;Acc:MGI:1918034]	2.78327	1.47678	6.73256e-06
Trpc3	transient receptor potential cation channel, subfamily C, member 3 [Source:MGI Symbol;Acc:MGI:109526]	2.78273	1.4765	0.000213993
Slc6a4	solute carrier family 6 (neurotransmitter transporter, serotonin), member 4 [Source:MGI Symbol;Acc:MGI:96285]	2.78238	1.47632	0.0252396
C130074G19Rik	RIKEN cDNA C130074G19 gene [Source:MGI Symbol;Acc:MGI:2444831]	2.77482	1.47239	1.01173e-13
Ephb1	Eph receptor B1 [Source:MGI Symbol;Acc:MGI:1096337]	2.77258	1.47123	0.0368258
Gfod1	glucose-fructose oxidoreductase domain containing 1 [Source:MGI Symbol;Acc:MGI:2145304]	2.77204	1.47095	0.00283297
Car4	carbonic anhydrase 4 [Source:MGI Symbol;Acc:MGI:1096574]	2.76568	1.46763	1.42973e-05
Ptgir	prostaglandin I receptor (IP) [Source:MGI Symbol;Acc:MGI:99535]	2.76325	1.46637	0.0120055
Srcin1	SRC kinase signaling inhibitor 1 [Source:MGI Symbol;Acc:MGI:1933179]	2.7606	1.46498	0.000245038
Scg5	secretogranin V [Source:MGI Symbol;Acc:MGI:98289]	2.75851	1.46389	0.0227891
Fzd4	frizzled class receptor 4 [Source:MGI Symbol;Acc:MGI:108520]	2.7562	1.46268	0.0145004
Kcna5	potassium voltage-gated channel, shaker-related subfamily, member 5 [Source:MGI Symbol;Acc:MGI:96662]	2.75453	1.46181	0.00828463
Me3	malic enzyme 3, NADP(+)-dependent, mitochondrial [Source:MGI Symbol;Acc:MGI:1916679]	2.7537	1.46137	0.00203031
Ifit3b	interferon-induced protein with tetratricopeptide repeats 3B [Source:MGI Symbol;Acc:MGI:3698419]	2.7478	1.45827	0.00285991
Isg15	ISG15 ubiquitin-like modifier [Source:MGI Symbol;Acc:MGI:1855694]	2.74604	1.45735	0.0266749
Cadps2	Ca2+-dependent activator protein for secretion 2 [Source:MGI Symbol;Acc:MGI:2443963]	2.74525	1.45694	0.024856
Sim2	single-minded family bHLH transcription factor 2 [Source:MGI Symbol;Acc:MGI:98307]	2.74176	1.4551	0.0380588
Kcne4	potassium voltage-gated channel, Isk-related subfamily, gene 4 [Source:MGI Symbol;Acc:MGI:1891125]	2.73937	1.45384	0.00772225
Fxyd7	FXYD domain-containing ion transport regulator 7 [Source:MGI Symbol;Acc:MGI:1889006]	2.73908	1.45369	0.00532161
Rtp4	receptor transporter protein 4 [Source:MGI Symbol;Acc:MGI:1915025]	2.73729	1.45275	0.0022851
Lamc2	laminin, gamma 2 [Source:MGI Symbol;Acc:MGI:99913]	2.73692	1.45255	1.13632e-09
Gpm6a	glycoprotein m6a [Source:MGI Symbol;Acc:MGI:107671]	2.73677	1.45248	0.000566027
Rflnb	refilin B [Source:MGI Symbol;Acc:MGI:1923816]	2.71725	1.44215	1.13529e-05
Chrm3	cholinergic receptor, muscarinic 3, cardiac [Source:MGI Symbol;Acc:MGI:88398]	2.7131	1.43994	0.0432218
Gm16701	predicted gene, 16701 [Source:MGI Symbol;Acc:MGI:4439625]	2.70536	1.43582	5.11077e-06
Gprc5c	G protein-coupled receptor, family C, group 5, member C [Source:MGI Symbol;Acc:MGI:1917605]	2.70447	1.43534	0.00456248
Cib2	calcium and integrin binding family member 2 [Source:MGI Symbol;Acc:MGI:1929293]	2.70213	1.4341	0.00115019
Slc36a2	solute carrier family 36 (proton/amino acid symporter), member 2 [Source:MGI Symbol;Acc:MGI:1891430]	2.70071	1.43334	0.00291692
Chil1	chitinase-like 1 [Source:MGI Symbol;Acc:MGI:1340899]	2.69835	1.43208	0.011227
Exph5	exophilin 5 [Source:MGI Symbol;Acc:MGI:2443248]	2.69706	1.43139	0.0421297
Zfhx2	zinc finger homeobox 2 [Source:MGI Symbol;Acc:MGI:2686934]	2.69394	1.42972	0.000347973
Fam57b	family with sequence similarity 57, member B [Source:MGI Symbol;Acc:MGI:1916202]	2.69293	1.42918	0.0258334
Etl4	enhancer trap locus 4 [Source:MGI Symbol;Acc:MGI:95454]	2.69223	1.4288	0.000418577
Plekha4	pleckstrin homology domain containing, family A (phosphoinositide binding specific) member 4 [Source:MGI Symbol;Acc:MGI:1916467]	2.68108	1.42281	0.00095056
Tpsb2	tryptase beta 2 [Source:MGI Symbol;Acc:MGI:96942]	2.68052	1.42251	0.000334514
Gstm7	glutathione S-transferase, mu 7 [Source:MGI Symbol;Acc:MGI:1915562]	2.67779	1.42104	0.00057964
[truncated: 994 more rows]

## Sheet: F
(F) The 227 genes significantly regulated in WT 1 week cut vs uninjured and c-Jun OE/+ 10 week cut vs uninjured (Fig. 10D)
[truncated: 458 more rows]
