# Supplementary material for: Failures of nerve regeneration caused by aging or chronic denervation are rescued by restoring Schwann cell c-Jun
Source: eLife. 2021 Jan 21;10:e62232. doi: 10.7554/eLife.62232 (PMC7819709; doi:10.7554/eLife.62232)
Supplement: Supplementary file 3. — Blue (top) indicates genes expressed at higher levels in cut nerves of WT mice compared with nerves of mice with conditional c-Jun inactivation selectively in Schwann cells (92 genes), while red (bottom) indicates genes expressed at lower levels in cut WT nerves compared to c-Jun mutant nerves (46 genes). [file elife-62232-supp3.xlsx]

## Sheet: Supplementary File 3
Gene	The 138 genes differentially expressed between 7 day cut WT and c-Jun cKO nerves (WT vs c-Jun cKO)
9530036O11Rik	RIKEN cDNA 9530036O11Rik [Source:MGI Symbol;Acc:MGI:2444607]
Adamts5	a disintegrin-like and metallopeptidase (reprolysin type) with thrombospondin type 1 motif, 5 (aggrecanase-2) [Source:MGI Symbol;Acc:MGI:1346321]
Adamtsl1	ADAMTS-like 1 [Source:MGI Symbol;Acc:MGI:1924989]
Aebp1	AE binding protein 1 [Source:MGI Symbol;Acc:MGI:1197012]
Aldh1a2	aldehyde dehydrogenase family 1, subfamily A2 [Source:MGI Symbol;Acc:MGI:107928]
Aldh1a3	aldehyde dehydrogenase family 1, subfamily A3 [Source:MGI Symbol;Acc:MGI:1861722]
Ank3	ankyrin 3, epithelial [Source:MGI Symbol;Acc:MGI:88026]
Apba2	amyloid beta (A4) precursor protein-binding, family A, member 2 [Source:MGI Symbol;Acc:MGI:1261791]
Arg1	arginase, liver [Source:MGI Symbol;Acc:MGI:88070]
Artn	artemin [Source:MGI Symbol;Acc:MGI:1333791]
Asgr1	asialoglycoprotein receptor 1 [Source:MGI Symbol;Acc:MGI:88081]
Aspa	aspartoacylase [Source:MGI Symbol;Acc:MGI:87914]
Bcl2	B cell leukemia/lymphoma 2 [Source:MGI Symbol;Acc:MGI:88138]
Bdnf	brain derived neurotrophic factor [Source:MGI Symbol;Acc:MGI:88145]
Bmp7	bone morphogenetic protein 7 [Source:MGI Symbol;Acc:MGI:103302]
Btc	betacellulin, epidermal growth factor family member [Source:MGI Symbol;Acc:MGI:99439]
C1ql2	complement component 1, q subcomponent-like 2 [Source:MGI Symbol;Acc:MGI:3032521]
Cdk5r1	cyclin-dependent kinase 5, regulatory subunit 1 (p35) [Source:MGI Symbol;Acc:MGI:101764]
Cgref1	cell growth regulator with EF hand domain 1 [Source:MGI Symbol;Acc:MGI:1915817]
Chst8	carbohydrate sulfotransferase 8 [Source:MGI Symbol;Acc:MGI:1916197]
Clca2	chloride channel accessory 2 [Source:MGI Symbol;Acc:MGI:2139758]
Col18a1	collagen, type XVIII, alpha 1 [Source:MGI Symbol;Acc:MGI:88451]
Cttnbp2	cortactin binding protein 2 [Source:MGI Symbol;Acc:MGI:1353467]
Cxcl5	chemokine (C-X-C motif) ligand 5 [Source:MGI Symbol;Acc:MGI:1096868]
Dnm3	dynamin 3 [Source:MGI Symbol;Acc:MGI:1341299]
Dok4	docking protein 4 [Source:MGI Symbol;Acc:MGI:2148865]
Dpysl3	dihydropyrimidinase-like 3 [Source:MGI Symbol;Acc:MGI:1349762]
Dtna	dystrobrevin alpha [Source:MGI Symbol;Acc:MGI:106039]
Duox1	dual oxidase 1 [Source:MGI Symbol;Acc:MGI:2139422]
Duoxa1	dual oxidase maturation factor 1 [Source:MGI Symbol;Acc:MGI:2384861]
Edil3	EGF-like repeats and discoidin I-like domains 3 [Source:MGI Symbol;Acc:MGI:1329025]
Emilin1	elastin microfibril interfacer 1 [Source:MGI Symbol;Acc:MGI:1926189]
Epha5	Eph receptor A5 [Source:MGI Symbol;Acc:MGI:99654]
Fbn2	fibrillin 2 [Source:MGI Symbol;Acc:MGI:95490]
Fgf5	fibroblast growth factor 5 [Source:MGI Symbol;Acc:MGI:95519]
Frzb	frizzled-related protein [Source:MGI Symbol;Acc:MGI:892032]
Fzd8	frizzled class receptor 8 [Source:MGI Symbol;Acc:MGI:108460]
Gap43	growth associated protein 43 [Source:MGI Symbol;Acc:MGI:95639]
Gdnf	glial cell line derived neurotrophic factor [Source:MGI Symbol;Acc:MGI:107430]
Gfra2	glial cell line derived neurotrophic factor family receptor alpha 2 [Source:MGI Symbol;Acc:MGI:1195462]
Gng2	guanine nucleotide binding protein (G protein), gamma 2 [Source:MGI Symbol;Acc:MGI:102705]
Gng4	guanine nucleotide binding protein (G protein), gamma 4 [Source:MGI Symbol;Acc:MGI:102703]
Gpc1	glypican 1 [Source:MGI Symbol;Acc:MGI:1194891]
Gria1	glutamate receptor, ionotropic, AMPA1 (alpha 1) [Source:MGI Symbol;Acc:MGI:95808]
Gzmb	granzyme B [Source:MGI Symbol;Acc:MGI:109267]
Hmga1	high mobility group AT-hook 1 [Source:MGI Symbol;Acc:MGI:96160]
Igfbp2	insulin-like growth factor binding protein 2 [Source:MGI Symbol;Acc:MGI:96437]
Igfbp3	insulin-like growth factor binding protein 3 [Source:MGI Symbol;Acc:MGI:96438]
Igsf3	immunoglobulin superfamily, member 3 [Source:MGI Symbol;Acc:MGI:1926158]
Jun	jun proto-oncogene [Source:MGI Symbol;Acc:MGI:96646]
Kcnd3	potassium voltage-gated channel, Shal-related family, member 3 [Source:MGI Symbol;Acc:MGI:1928743]
Lbh	limb-bud and heart [Source:MGI Symbol;Acc:MGI:1925139]
Lingo1	leucine rich repeat and Ig domain containing 1 [Source:MGI Symbol;Acc:MGI:1915522]
Lman1	lectin, mannose-binding, 1 [Source:MGI Symbol;Acc:MGI:1917611]
Met	met proto-oncogene [Source:MGI Symbol;Acc:MGI:96969]
Mmp17	matrix metallopeptidase 17 [Source:MGI Symbol;Acc:MGI:1346076]
Ndp	Norrie disease (pseudoglioma) (human) [Source:MGI Symbol;Acc:MGI:102570]
Nes	nestin [Source:MGI Symbol;Acc:MGI:101784]
Nrcam	neuronal cell adhesion molecule [Source:MGI Symbol;Acc:MGI:104750]
Olig1	oligodendrocyte transcription factor 1 [Source:MGI Symbol;Acc:MGI:1355334]
Pappa	pregnancy-associated plasma protein A [Source:MGI Symbol;Acc:MGI:97479]
Paxip1	PAX interacting (with transcription-activation domain) protein 1 [Source:MGI Symbol;Acc:MGI:1890430]
Pcdh17	protocadherin 17 [Source:MGI Symbol;Acc:MGI:2684924]
Pcdh20	protocadherin 20 [Source:MGI Symbol;Acc:MGI:2443376]
Pcdh9	protocadherin 9 [Source:MGI Symbol;Acc:MGI:1306801]
Plat	plasminogen activator, tissue [Source:MGI Symbol;Acc:MGI:97610]
Rgs16	regulator of G-protein signaling 16 [Source:MGI Symbol;Acc:MGI:108407]
Rgs8	regulator of G-protein signaling 8 [Source:MGI Symbol;Acc:MGI:108408]
Rpp25	ribonuclease P/MRP 25 subunit [Source:MGI Symbol;Acc:MGI:2143151]
Runx2	runt related transcription factor 2 [Source:MGI Symbol;Acc:MGI:99829]
Sacs	sacsin [Source:MGI Symbol;Acc:MGI:1354724]
Sema3e	sema domain, immunoglobulin domain (Ig), short basic domain, secreted, (semaphorin) 3E [Source:MGI Symbol;Acc:MGI:1340034]
Sema4f	sema domain, immunoglobulin domain (Ig), TM domain, and short cytoplasmic domain [Source:MGI Symbol;Acc:MGI:1340055]
Sez6	seizure related gene 6 [Source:MGI Symbol;Acc:MGI:104745]
Shh	sonic hedgehog [Source:MGI Symbol;Acc:MGI:98297]
Shroom3	shroom family member 3 [Source:MGI Symbol;Acc:MGI:1351655]
Slc37a1	solute carrier family 37 (glycerol-3-phosphate transporter), member 1 [Source:MGI Symbol;Acc:MGI:2446181]
Slc6a1	solute carrier family 6 (neurotransmitter transporter, GABA), member 1 [Source:MGI Symbol;Acc:MGI:95627]
Sox13	SRY (sex determining region Y)-box 13 [Source:MGI Symbol;Acc:MGI:98361]
Srpk2	serine/arginine-rich protein specific kinase 2 [Source:MGI Symbol;Acc:MGI:1201408]
Stc2	stanniocalcin 2 [Source:MGI Symbol;Acc:MGI:1316731]
Tgfa	transforming growth factor alpha [Source:MGI Symbol;Acc:MGI:98724]
Thy1	thymus cell antigen 1, theta [Source:MGI Symbol;Acc:MGI:98747]
Tmem132d	transmembrane protein 132D [Source:MGI Symbol;Acc:MGI:3044963]
Tmem158	transmembrane protein 158 [Source:MGI Symbol;Acc:MGI:1919559]
Tnc	tenascin C [Source:MGI Symbol;Acc:MGI:101922]
Tspan15	tetraspanin 15 [Source:MGI Symbol;Acc:MGI:1917673]
Uchl1	ubiquitin carboxy-terminal hydrolase L1 [Source:MGI Symbol;Acc:MGI:103149]
Vcan	versican [Source:MGI Symbol;Acc:MGI:102889]
Vstm2b	V-set and transmembrane domain containing 2B [Source:MGI Symbol;Acc:MGI:1914525]
Wif1	Wnt inhibitory factor 1 [Source:MGI Symbol;Acc:MGI:1344332]
Cdh1	cadherin 1 [Source:MGI Symbol;Acc:MGI:88354]
Acot1	acyl-CoA thioesterase 1 [Source:MGI Symbol;Acc:MGI:1349396]
Adam23	a disintegrin and metallopeptidase domain 23 [Source:MGI Symbol;Acc:MGI:1345162]
Adamts20	a disintegrin-like and metallopeptidase (reprolysin type) with thrombospondin type 1 motif, 20 [Source:MGI Symbol;Acc:MGI:2660628]
Aqp5	aquaporin 5 [Source:MGI Symbol;Acc:MGI:106215]
Arnt2	aryl hydrocarbon receptor nuclear translocator 2 [Source:MGI Symbol;Acc:MGI:107188]
Chl1	cell adhesion molecule L1-like [Source:MGI Symbol;Acc:MGI:1098266]
Cmtm5	CKLF-like MARVEL transmembrane domain containing 5 [Source:MGI Symbol;Acc:MGI:2447164]
Crym	crystallin, mu [Source:MGI Symbol;Acc:MGI:102675]
Csdc2	cold shock domain containing C2, RNA binding [Source:MGI Symbol;Acc:MGI:2146027]
Dkk3	dickkopf WNT signaling pathway inhibitor 3 [Source:MGI Symbol;Acc:MGI:1354952]
Ednrb	endothelin receptor type B [Source:MGI Symbol;Acc:MGI:102720]
Egfl8	EGF-like domain 8 [Source:MGI Symbol;Acc:MGI:1932094]
Fabp7	fatty acid binding protein 7, brain [Source:MGI Symbol;Acc:MGI:101916]
Fhdc1	FH2 domain containing 1 [Source:MGI Symbol;Acc:MGI:2684972]
Gas2l3	growth arrest-specific 2 like 3 [Source:MGI Symbol;Acc:MGI:1918780]
Gjb1	gap junction protein, beta 1 [Source:MGI Symbol;Acc:MGI:95719]
Gpr37l1	G protein-coupled receptor 37-like 1 [Source:MGI Symbol;Acc:MGI:1928503]
Grik2	glutamate receptor, ionotropic, kainate 2 (beta 2) [Source:MGI Symbol;Acc:MGI:95815]
Grik3	glutamate receptor, ionotropic, kainate 3 [Source:MGI Symbol;Acc:MGI:95816]
Hook1	hook microtubule tethering protein 1 [Source:MGI Symbol;Acc:MGI:1925213]
Igsf11	immunoglobulin superfamily, member 11 [Source:MGI Symbol;Acc:MGI:2388477]
Kcnj10	potassium inwardly-rectifying channel, subfamily J, member 10 [Source:MGI Symbol;Acc:MGI:1194504]
Kif21a	kinesin family member 21A [Source:MGI Symbol;Acc:MGI:109188]
Klrb1a	killer cell lectin-like receptor subfamily B member 1A [Source:MGI Symbol;Acc:MGI:107540]
Ldlrad3	low density lipoprotein receptor class A domain containing 3 [Source:MGI Symbol;Acc:MGI:2138856]
Limch1	LIM and calponin homology domains 1 [Source:MGI Symbol;Acc:MGI:1924819]
Lrrn3	leucine rich repeat protein 3, neuronal [Source:MGI Symbol;Acc:MGI:106036]
Lrrtm4	leucine rich repeat transmembrane neuronal 4 [Source:MGI Symbol;Acc:MGI:2389180]
Mapt	microtubule-associated protein tau [Source:MGI Symbol;Acc:MGI:97180]
Mbp	myelin basic protein [Source:MGI Symbol;Acc:MGI:96925]
Megf10	multiple EGF-like-domains 10 [Source:MGI Symbol;Acc:MGI:2685177]
Mpz	myelin protein zero [Source:MGI Symbol;Acc:MGI:103177]
Nr4a1	nuclear receptor subfamily 4, group A, member 1 [Source:MGI Symbol;Acc:MGI:1352454]
Nr4a2	nuclear receptor subfamily 4, group A, member 2 [Source:MGI Symbol;Acc:MGI:1352456]
Plekha4	pleckstrin homology domain containing, family A (phosphoinositide binding specific) member 4 [Source:MGI Symbol;Acc:MGI:1916467]
Prss12	protease, serine 12 neurotrypsin (motopsin) [Source:MGI Symbol;Acc:MGI:1100881]
Psrc1	proline/serine-rich coiled-coil 1 [Source:MGI Symbol;Acc:MGI:1913099]
Rab38	RAB38, member RAS oncogene family [Source:MGI Symbol;Acc:MGI:1919683]
Scn8a	sodium channel, voltage-gated, type VIII, alpha [Source:MGI Symbol;Acc:MGI:103169]
Slc12a2	solute carrier family 12, member 2 [Source:MGI Symbol;Acc:MGI:101924]
Sostdc1	sclerostin domain containing 1 [Source:MGI Symbol;Acc:MGI:1913292]
Syt4	synaptotagmin IV [Source:MGI Symbol;Acc:MGI:101759]
Tex15	testis expressed gene 15 [Source:MGI Symbol;Acc:MGI:1934816]
Tmprss5	transmembrane protease, serine 5 (spinesin) [Source:MGI Symbol;Acc:MGI:1933407]
Trpm3	transient receptor potential cation channel, subfamily M, member 3 [Source:MGI Symbol;Acc:MGI:2443101]
Zdhhc2	zinc finger, DHHC domain containing 2 [Source:MGI Symbol;Acc:MGI:1923452]
