# Supplementary material for: Failures of nerve regeneration caused by aging or chronic denervation are rescued by restoring Schwann cell c-Jun
Source: eLife. 2021 Jan 21;10:e62232. doi: 10.7554/eLife.62232 (PMC7819709; doi:10.7554/eLife.62232)
Supplement: Supplementary file 4. — Genes expressed at higher levels after chronic denervation are in blue (top), while genes with reduced expression are in red (bottom). [file elife-62232-supp4.xlsx]

## Sheet: Supplementary File 4
Experimental Condition	Gene	Fold Change	log Fold Change	Adjusted p value
	Ighg2b	9720.8	13.2469	0.000345005
	Ighv1-22	953.76	9.89748	0.0015601
	Crybg2	841.492	9.71681	0.00032853
	Myh4	688.911	9.42817	0.0187325
	Igkv6-15	439.079	8.77834	0.00382025
	Igkv8-24	368.46	8.52536	0.0466294
Chronic denervation; 10 weeks vs 1 week	Ighv1-75	310.542	8.27865	0.00306238
	Atp2a1	290.35	8.18165	0.0198366
	Igha	213.518	7.73821	0.00622009
	Xirp2	209.862	7.7133	0.0355989
	Iglc2	198.421	7.63242	1.1697e-05
	Igkv12-98	188.5	7.55842	8.93078e-05
	Prr32	188.456	7.55809	7.44861e-06
	Igkv6-17	184.923	7.53078	0.0372029
	Malrd1	0.000578939	-10.7543	2.97177e-39
